# Supplementary material for: Clustering Pattern and Functional Effect of SNPs in Human miRNA Seed Regions
Source: Int J Genomics. 2018 Mar 6;2018:2456076. doi: 10.1155/2018/2456076 (PMC5859846; doi:10.1155/2018/2456076)
Supplement: Supplementary 2 — Table S1: genome-wide identification of SNPs in human miRNA seed regions. [file 2456076.f2.xls]

## Sheet: Sheet1
Supplemental Table S1. Genome-wide identification of SNPs in human miRNA seed regions.
Index	Mature miRNA name	Chr	Starnd	Precursors name	Clustered miRNA	Number of SNPs in miRNA reed region	Variation ID	Location of Variation (hg38)	Alleles	MAF	Seed positions	miRNA reference sequence	miRNA derived sequence	miRNA sequence for mir2GO	Number of reference targets (targetRank)	Number of derived targets (targetRank)	number of overlapping genes	Percent overlap (cosine similarity)
1	hsa-miR-6859-5p	chr1	-	hsa-mir-6859-1	No	0
2	hsa-miR-6859-3p	chr1	-	hsa-mir-6859-1	No	1	rs201535981	17385	G > A	0.245377	7	UGACCCCCAUGUCGCCUCUGUAG	UGACCCUCAUGUCGCCUCUGUAG	hsa-miR-6859-3p,UGACCC[C/U]CAUGUCGCCUCUGUAG	309	260	21	7.40889
3	hsa-miR-1302	chr1	+	hsa-mir-1302-2	No	0
4	hsa-miR-6859-5p	chr1	-	hsa-mir-6859-2	No	0
5	hsa-miR-6859-3p	chr1	-	hsa-mir-6859-2	No	0
6	hsa-miR-6723-5p	chr1	-	hsa-mir-6723	No	0
7	hsa-miR-200b-5p	chr1	+	hsa-mir-200b	Yes (1167123-1169076:3:homo:hsa-mir-200b/hsa-mir-200a/hsa-mir-429)	0
8	hsa-miR-200b-3p	chr1	+	hsa-mir-200b	Yes (1167123-1169076:3:homo:hsa-mir-200b/hsa-mir-200a/hsa-mir-429)	1	rs370128336	1167167	G > T	1e-05	8	UAAUACUGCCUGGUAAUGAUGA	UAAUACUUCCUGGUAAUGAUGA	hsa-miR-200b-3p,UAAUACU[G/U]CCUGGUAAUGAUGA	1316	1321	683	51.8014
9	hsa-miR-200a-5p	chr1	+	hsa-mir-200a	Yes (1167123-1169076:3:homo:hsa-mir-200b/hsa-mir-200a/hsa-mir-429)	0
10	hsa-miR-200a-3p	chr1	+	hsa-mir-200a	Yes (1167123-1169076:3:homo:hsa-mir-200b/hsa-mir-200a/hsa-mir-429)	0
11	hsa-miR-429	chr1	+	hsa-mir-429	Yes (1167123-1169076:3:homo:hsa-mir-200b/hsa-mir-200a/hsa-mir-429)	2	rs777220333	1169060	C > T	3.4e-05	6	UAAUACUGUCUGGUAAAACCGU	UAAUAUUGUCUGGUAAAACCGU	hsa-miR-429,UAAUA[C/U]UGUCUGGUAAAACCGU	1316	1836	547	35.1903
11	hsa-miR-429	chr1	+	hsa-mir-429	Yes (1167123-1169076:3:homo:hsa-mir-200b/hsa-mir-200a/hsa-mir-429)	2	rs370935426	1169058	T > C	2.6e-05	4	UAAUACUGUCUGGUAAAACCGU	UAACACUGUCUGGUAAAACCGU	hsa-miR-429,UAA[U/C]ACUGUCUGGUAAAACCGU	1316	1115	320	26.4171
12	hsa-miR-6726-5p	chr1	-	hsa-mir-6726	No	2	rs199607738	1296164	C > T	9.1e-05	2	CGGGAGCUGGGGUCUGCAGGU	CAGGAGCUGGGGUCUGCAGGU	hsa-miR-6726-5p,C[G/A]GGAGCUGGGGUCUGCAGGU	399	328	35	9.67486
12	hsa-miR-6726-5p	chr1	-	hsa-mir-6726	No	2	rs749266601	1296162	C > T	1.4e-05	4	CGGGAGCUGGGGUCUGCAGGU	CGGAAGCUGGGGUCUGCAGGU	hsa-miR-6726-5p,CGG[G/A]AGCUGGGGUCUGCAGGU	399	489	39	8.82925
13	hsa-miR-6726-3p	chr1	-	hsa-mir-6726	No	5	rs369338671	1296125	G > A	4.5e-05	5	CUCGCCCUGUCUCCCGCUAG	CUCGUCCUGUCUCCCGCUAG	hsa-miR-6726-3p,CUCG[C/U]CCUGUCUCCCGCUAG	32	30	0	0
13	hsa-miR-6726-3p	chr1	-	hsa-mir-6726	No	5	rs372530591	1296122	A > G	0.000163	8	CUCGCCCUGUCUCCCGCUAG	CUCGCCCCGUCUCCCGCUAG	hsa-miR-6726-3p,CUCGCCC[U/C]GUCUCCCGCUAG	32	33	3	9.23186
13	hsa-miR-6726-3p	chr1	-	hsa-mir-6726	No	5	rs619608	1296127	G > A	0.097847	3	CUCGCCCUGUCUCCCGCUAG	CUUGCCCUGUCUCCCGCUAG	hsa-miR-6726-3p,CU[C/U]GCCCUGUCUCCCGCUAG	32	347	1	0.948987
13	hsa-miR-6726-3p	chr1	-	hsa-mir-6726	No	5	rs752144252	1296126	C > T	2.7e-05	4	CUCGCCCUGUCUCCCGCUAG	CUCACCCUGUCUCCCGCUAG	hsa-miR-6726-3p,CUC[G/A]CCCUGUCUCCCGCUAG	32	349	0	0
13	hsa-miR-6726-3p	chr1	-	hsa-mir-6726	No	5	rs376193058	1296123	G > A	1.8e-05	7	CUCGCCCUGUCUCCCGCUAG	CUCGCCUUGUCUCCCGCUAG	hsa-miR-6726-3p,CUCGCC[C/U]UGUCUCCCGCUAG	32	27	0	0
14	hsa-miR-6727-5p	chr1	-	hsa-mir-6727	No	4	rs202175375	1312559	G > A	0.000931	3	CUCGGGGCAGGCGGCUGGGAGCG	CUUGGGGCAGGCGGCUGGGAGCG	hsa-miR-6727-5p,CU[C/U]GGGGCAGGCGGCUGGGAGCG	55	592	5	2.77094
14	hsa-miR-6727-5p	chr1	-	hsa-mir-6727	No	4	rs774372310	1312558	C > T	5.4e-05	4	CUCGGGGCAGGCGGCUGGGAGCG	CUCAGGGCAGGCGGCUGGGAGCG	hsa-miR-6727-5p,CUC[G/A]GGGCAGGCGGCUGGGAGCG	55	572	5	2.81897
14	hsa-miR-6727-5p	chr1	-	hsa-mir-6727	No	4	rs767350187	1312560	A > G	1.7e-05	2	CUCGGGGCAGGCGGCUGGGAGCG	CCCGGGGCAGGCGGCUGGGAGCG	hsa-miR-6727-5p,C[U/C]CGGGGCAGGCGGCUGGGAGCG	55	123	7	8.51068
14	hsa-miR-6727-5p	chr1	-	hsa-mir-6727	No	4	rs768440905	1312555	C > T	0.000154	7	CUCGGGGCAGGCGGCUGGGAGCG	CUCGGGACAGGCGGCUGGGAGCG	hsa-miR-6727-5p,CUCGGG[G/A]CAGGCGGCUGGGAGCG	55	36	0	0
15	hsa-miR-6727-3p	chr1	-	hsa-mir-6727	No	2	rs755581282	1312520	G > A	2.9e-05	2	UCCUGCCACCUCCUCCGCAG	UUCUGCCACCUCCUCCGCAG	hsa-miR-6727-3p,U[C/U]CUGCCACCUCCUCCGCAG	686	666	85	12.5753
15	hsa-miR-6727-3p	chr1	-	hsa-mir-6727	No	2	rs754385797	1312515	G > A	3e-05	7	UCCUGCCACCUCCUCCGCAG	UCCUGCUACCUCCUCCGCAG	hsa-miR-6727-3p,UCCUGC[C/U]ACCUCCUCCGCAG	686	457	93	16.6097
16	hsa-miR-6808-5p	chr1	-	hsa-mir-6808	No	2	rs200363718	1339702	T > C	0.000539	2	CAGGCAGGGAGGUGGGACCAUG	CGGGCAGGGAGGUGGGACCAUG	hsa-miR-6808-5p,C[A/G]GGCAGGGAGGUGGGACCAUG	1024	1139	258	23.8895
16	hsa-miR-6808-5p	chr1	-	hsa-mir-6808	No	2	rs781187339	1339701	C > T	1.7e-05	3	CAGGCAGGGAGGUGGGACCAUG	CAAGCAGGGAGGUGGGACCAUG	hsa-miR-6808-5p,CA[G/A]GCAGGGAGGUGGGACCAUG	1024	755	149	16.9458
17	hsa-miR-6808-3p	chr1	-	hsa-mir-6808	No	1	rs767910136	1339664	G > C	9e-06	7	GUGUGACCACCGUUCCUGCAG	GUGUGAGCACCGUUCCUGCAG	hsa-miR-6808-3p,GUGUGA[C/G]CACCGUUCCUGCAG	334	358	21	6.07302
18	hsa-miR-4251	chr1	+	hsa-mir-4251	No	1	rs529666453	3128014	G > A	0.0002	6	CCUGAGAAAAGGGCCAA	CCUGAAAAAAGGGCCAA	hsa-miR-4251,CCUGA[G/A]AAAAGGGCCAA	1022	1964	377	26.61
19	hsa-miR-551a	chr1	-	hsa-mir-551a	No	2	rs187195064	3560728	C > T	0.003501	3	GCGACCCACUCUUGGUUUCCA	GCAACCCACUCUUGGUUUCCA	hsa-miR-551a,GC[G/A]ACCCACUCUUGGUUUCCA	18	307	1	1.34522
19	hsa-miR-551a	chr1	-	hsa-mir-551a	No	2	rs748054931	3560726	G > A	9e-06	5	GCGACCCACUCUUGGUUUCCA	GCGAUCCACUCUUGGUUUCCA	hsa-miR-551a,GCGA[C/U]CCACUCUUGGUUUCCA	18	35	0	0
20	hsa-miR-4417	chr1	+	hsa-mir-4417	No	0
21	hsa-miR-4689	chr1	-	hsa-mir-4689	No	0
22	hsa-miR-4252	chr1	-	hsa-mir-4252	No	0
23	hsa-miR-6728-5p	chr1	-	hsa-mir-6728	No	0
24	hsa-miR-6728-3p	chr1	-	hsa-mir-6728	No	1	rs746374398	8866516	G > A	9.9e-05	7	UCUCUGCUCUGCUCUCCCCAG	UCUCUGUUCUGCUCUCCCCAG	hsa-miR-6728-3p,UCUCUG[C/U]UCUGCUCUCCCCAG	732	770	108	14.3854
25	hsa-miR-34a-5p	chr1	-	hsa-mir-34a	No	2	rs756492579	9151754	C > T	8e-06	3	UGGCAGUGUCUUAGCUGGUUGU	UGACAGUGUCUUAGCUGGUUGU	hsa-miR-34a-5p,UG[G/A]CAGUGUCUUAGCUGGUUGU	562	566	69	12.2341
25	hsa-miR-34a-5p	chr1	-	hsa-mir-34a	No	2	rs369892834	9151752	T > C	9.7e-05	5	UGGCAGUGUCUUAGCUGGUUGU	UGGCGGUGUCUUAGCUGGUUGU	hsa-miR-34a-5p,UGGC[A/G]GUGUCUUAGCUGGUUGU	562	60	8	4.35659
26	hsa-miR-34a-3p	chr1	-	hsa-mir-34a	No	1	rs763206520	9151707	G > T	8e-06	8	CAAUCAGCAAGUAUACUGCCCU	CAAUCAGAAAGUAUACUGCCCU	hsa-miR-34a-3p,CAAUCAG[C/A]AAGUAUACUGCCCU	601	859	302	42.0313
27	hsa-miR-5697	chr1	+	hsa-mir-5697	No	0
28	hsa-miR-1273d	chr1	+	hsa-mir-1273d	No	1	rs769185610	10227733	A > G	0.05	7	GAACCCAUGAGGUUGAGGCUGCAGU	GAACCCGUGAGGUUGAGGCUGCAGU	hsa-miR-1273d,GAACCC[A/G]UGAGGUUGAGGCUGCAGU	446	23	2	1.97469
29	hsa-miR-6729-5p	chr1	+	hsa-mir-6729	No	2	rs75036690	12029168	G > A	0.003287	6	UGGGCGAGGGCGGCUGAGCGGC	UGGGCAAGGGCGGCUGAGCGGC	hsa-miR-6729-5p,UGGGC[G/A]AGGGCGGCUGAGCGGC	52	429	4	2.67812
29	hsa-miR-6729-5p	chr1	+	hsa-mir-6729	No	2	rs778378615	12029167	C > T	1.7e-05	5	UGGGCGAGGGCGGCUGAGCGGC	UGGGUGAGGGCGGCUGAGCGGC	hsa-miR-6729-5p,UGGG[C/U]GAGGGCGGCUGAGCGGC	52	419	7	4.7423
30	hsa-miR-6729-3p	chr1	+	hsa-mir-6729	No	1	rs750216315	12029207	C > T	3.4e-05	6	UCAUCCCCCUCGCCCUCUCAG	UCAUCUCCCUCGCCCUCUCAG	hsa-miR-6729-3p,UCAUC[C/U]CCCUCGCCCUCUCAG	480	683	65	11.3523
31	hsa-miR-7846-3p	chr1	+	hsa-mir-7846	No	1	rs5745949	12167017	G > T	0.000399	8	CAGCGGAGCCUGGAGAGAAGG	CAGCGGAUCCUGGAGAGAAGG	hsa-miR-7846-3p,CAGCGGA[G/U]CCUGGAGAGAAGG	18	15	4	24.3432
32	hsa-miR-4632-3p	chr1	+	hsa-mir-4632	No	2	rs758783633	12191758	C > G	9e-06	7	UGCCGCCCUCUCGCUGCUCUAG	UGCCGCGCUCUCGCUGCUCUAG	hsa-miR-4632-3p,UGCCGC[C/G]CUCUCGCUGCUCUAG	78	21	2	4.94166
32	hsa-miR-4632-3p	chr1	+	hsa-mir-4632	No	2	rs372809836	12191755	C > T	0.000253	4	UGCCGCCCUCUCGCUGCUCUAG	UGCUGCCCUCUCGCUGCUCUAG	hsa-miR-4632-3p,UGC[C/U]GCCCUCUCGCUGCUCUAG	78	608	16	7.34718
33	hsa-miR-4632-5p	chr1	+	hsa-mir-4632	No	1	rs759820006	12191720	G > A	1.2e-05	8	GAGGGCAGCGUGGGUGUGGCGGA	GAGGGCAACGUGGGUGUGGCGGA	hsa-miR-4632-5p,GAGGGCA[G/A]CGUGGGUGUGGCGGA	591	571	237	40.7978
34	hsa-miR-6730-5p	chr1	-	hsa-mir-6730	No	0
35	hsa-miR-6730-3p	chr1	-	hsa-mir-6730	No	1	rs749031572	12578975	T > C	9e-06	5	CCUGACACCCCAUCUGCCCUCA	CCUGGCACCCCAUCUGCCCUCA	hsa-miR-6730-3p,CCUG[A/G]CACCCCAUCUGCCCUCA	571	592	72	12.3838
36	hsa-miR-3675-5p	chr1	-	hsa-mir-3675	No	4	rs771338088	16859003	G > A	4e-05	8	UAUGGGGCUUCUGUAGAGAUUUC	UAUGGGGUUUCUGUAGAGAUUUC	hsa-miR-3675-5p,UAUGGGG[C/U]UUCUGUAGAGAUUUC	369	353	136	37.6824
36	hsa-miR-3675-5p	chr1	-	hsa-mir-3675	No	4	rs774834919	16859004	C > T	1e-05	7	UAUGGGGCUUCUGUAGAGAUUUC	UAUGGGACUUCUGUAGAGAUUUC	hsa-miR-3675-5p,UAUGGG[G/A]CUUCUGUAGAGAUUUC	369	318	32	9.34164
36	hsa-miR-3675-5p	chr1	-	hsa-mir-3675	No	4	rs768029583	16859008	A > G	0.000149	3	UAUGGGGCUUCUGUAGAGAUUUC	UACGGGGCUUCUGUAGAGAUUUC	hsa-miR-3675-5p,UA[U/C]GGGGCUUCUGUAGAGAUUUC	369	41	4	3.25203
36	hsa-miR-3675-5p	chr1	-	hsa-mir-3675	No	4	rs202014433	16859005	C > T	0.221968	6	UAUGGGGCUUCUGUAGAGAUUUC	UAUGGAGCUUCUGUAGAGAUUUC	hsa-miR-3675-5p,UAUGG[G/A]GCUUCUGUAGAGAUUUC	369	360	21	5.76176
37	hsa-miR-3675-3p	chr1	-	hsa-mir-3675	No	2	rs758121781	16858978	T > C	3.8e-05	2	CAUCUCUAAGGAACUCCCCCAA	CGUCUCUAAGGAACUCCCCCAA	hsa-miR-3675-3p,C[A/G]UCUCUAAGGAACUCCCCCAA	645	483	58	10.3914
37	hsa-miR-3675-3p	chr1	-	hsa-mir-3675	No	2	rs750057424	16858977	A > G	0.000118	3	CAUCUCUAAGGAACUCCCCCAA	CACCUCUAAGGAACUCCCCCAA	hsa-miR-3675-3p,CA[U/C]CUCUAAGGAACUCCCCCAA	645	391	74	14.7355
38	hsa-miR-3972	chr1	+	hsa-mir-3972	No	0
39	hsa-miR-4695-5p	chr1	-	hsa-mir-4695	No	2	rs527298059	18883269	C > T	1.6e-05	3	CAGGAGGCAGUGGGCGAGCAGG	CAAGAGGCAGUGGGCGAGCAGG	hsa-miR-4695-5p,CA[G/A]GAGGCAGUGGGCGAGCAGG	899	708	122	15.292
39	hsa-miR-4695-5p	chr1	-	hsa-mir-4695	No	2	rs79637190	18883265	C > T	0.005902	7	CAGGAGGCAGUGGGCGAGCAGG	CAGGAGACAGUGGGCGAGCAGG	hsa-miR-4695-5p,CAGGAG[G/A]CAGUGGGCGAGCAGG	899	725	135	16.7219
40	hsa-miR-4695-3p	chr1	-	hsa-mir-4695	No	0
41	hsa-miR-1290	chr1	-	hsa-mir-1290	No	2	rs530117318	18897094	C > T	9e-06	3	UGGAUUUUUGGAUCAGGGA	UGAAUUUUUGGAUCAGGGA	hsa-miR-1290,UG[G/A]AUUUUUGGAUCAGGGA	917	1614	266	21.8648
41	hsa-miR-1290	chr1	-	hsa-mir-1290	No	2	rs764376563	18897093	T > C	3.7e-05	4	UGGAUUUUUGGAUCAGGGA	UGGGUUUUUGGAUCAGGGA	hsa-miR-1290,UGG[A/G]UUUUUGGAUCAGGGA	917	765	129	15.4019
42	hsa-miR-6084	chr1	+	hsa-mir-6084	No	1	rs750146116	20633761	C > T	9e-06	6	UUCCGCCAGUCGGUGGCCGG	UUCCGUCAGUCGGUGGCCGG	hsa-miR-6084,UUCCG[C/U]CAGUCGGUGGCCGG	29	41	1	2.90007
43	hsa-miR-1256	chr1	-	hsa-mir-1256	No	0
44	hsa-miR-4418	chr1	+	hsa-mir-4418	No	0
45	hsa-miR-6127	chr1	-	hsa-mir-6127	No	0
46	hsa-miR-4684-5p	chr1	+	hsa-mir-4684	No	0
47	hsa-miR-4684-3p	chr1	+	hsa-mir-4684	No	0
48	hsa-miR-4253	chr1	-	hsa-mir-4253	No	1	rs770933694	22863183	C > T	8e-06	4	AGGGCAUGUCCAGGGGGU	AGGACAUGUCCAGGGGGU	hsa-miR-4253,AGG[G/A]CAUGUCCAGGGGGU	359	398	31	8.20112
49	hsa-miR-3115	chr1	+	hsa-mir-3115	No	0
50	hsa-miR-4419a	chr1	-	hsa-mir-4419a	No	0
51	hsa-miR-378f	chr1	+	hsa-mir-378f	No	0
52	hsa-miR-6731-5p	chr1	-	hsa-mir-6731	No	1	rs754415804	24919405	T > C	4.1e-05	7	UGGGAGAGCAGGGUAUUGUGGA	UGGGAGGGCAGGGUAUUGUGGA	hsa-miR-6731-5p,UGGGAG[A/G]GCAGGGUAUUGUGGA	948	1486	325	27.3823
53	hsa-miR-6731-3p	chr1	-	hsa-mir-6731	No	0
54	hsa-miR-4425	chr1	+	hsa-mir-4425	No	1	rs542147188	25023555	T > C	0.0002	4	UGUUGGGAUUCAGCAGGACCAU	UGUCGGGAUUCAGCAGGACCAU	hsa-miR-4425,UGU[U/C]GGGAUUCAGCAGGACCAU	384	29	0	0
55	hsa-miR-3917	chr1	-	hsa-mir-3917	No	1	rs775751973	25906400	G > A	0.000206	4	GCUCGGACUGAGCAGGUGGG	GCUUGGACUGAGCAGGUGGG	hsa-miR-3917,GCU[C/U]GGACUGAGCAGGUGGG	36	374	2	1.72363
56	hsa-miR-1976	chr1	+	hsa-mir-1976	No	1	rs765589931	26554577	C > G	9e-06	4	CCUCCUGCCCUCCUUGCUGU	CCUGCUGCCCUCCUUGCUGU	hsa-miR-1976,CCU[C/G]CUGCCCUCCUUGCUGU	944	950	180	19.0075
57	hsa-miR-4420	chr1	-	hsa-mir-4420	No	0
58	hsa-miR-4254	chr1	-	hsa-mir-4254	No	1	rs564274475	31758685	C > T	0.0002	8	GCCUGGAGCUACUCCACCAUCUC	GCCUGGAACUACUCCACCAUCUC	hsa-miR-4254,GCCUGGA[G/A]CUACUCCACCAUCUC	729	741	295	40.1374
59	hsa-miR-5585-5p	chr1	+	hsa-mir-5585	No	0
60	hsa-miR-5585-3p	chr1	+	hsa-mir-5585	No	1	rs141449846	32086991	T > G	0.002396	6	CUGAAUAGCUGGGACUACAGGU	CUGAAGAGCUGGGACUACAGGU	hsa-miR-5585-3p,CUGAA[U/G]AGCUGGGACUACAGGU	747	893	155	18.9778
61	hsa-miR-3605-5p	chr1	-	hsa-mir-3605	No	2	rs577439356	33332467	C > A	0.000114	5	UGAGGAUGGAUAGCAAGGAAGCC	UGAGUAUGGAUAGCAAGGAAGCC	hsa-miR-3605-5p,UGAG[G/U]AUGGAUAGCAAGGAAGCC	409	335	29	7.83455
61	hsa-miR-3605-5p	chr1	-	hsa-mir-3605	No	2	rs750198753	33332465	A > C	2.5e-05	7	UGAGGAUGGAUAGCAAGGAAGCC	UGAGGAGGGAUAGCAAGGAAGCC	hsa-miR-3605-5p,UGAGGA[U/G]GGAUAGCAAGGAAGCC	409	913	62	10.146
62	hsa-miR-3605-3p	chr1	-	hsa-mir-3605	No	1	rs200490191	33332420	C > T	1.6e-05	8	CCUCCGUGUUACCUGUCCUCUAG	CCUCCGUAUUACCUGUCCUCUAG	hsa-miR-3605-3p,CCUCCGU[G/A]UUACCUGUCCUCUAG	55	37	2	4.43351
63	hsa-miR-552-3p	chr1	-	hsa-mir-552	No	0
64	hsa-miR-552-5p	chr1	-	hsa-mir-552	No	2	rs76067517	34669669	A > G	0.003727	2	GUUUAACCUUUUGCCUGUUGG	GCUUAACCUUUUGCCUGUUGG	hsa-miR-552-5p,G[U/C]UUAACCUUUUGCCUGUUGG	1160	428	125	17.7402
64	hsa-miR-552-5p	chr1	-	hsa-mir-552	No	2	rs766113217	34669663	G > A	0.000105	8	GUUUAACCUUUUGCCUGUUGG	GUUUAACUUUUUGCCUGUUGG	hsa-miR-552-5p,GUUUAAC[C/U]UUUUGCCUGUUGG	1160	1357	783	62.4084
65	hsa-miR-4255	chr1	+	hsa-mir-4255	No	0
66	hsa-miR-6732-5p	chr1	+	hsa-mir-6732	No	1	rs372979971	37480238	G > T	9e-06	4	UAGGGGGUGGCAGGCUGGCC	UAGUGGGUGGCAGGCUGGCC	hsa-miR-6732-5p,UAG[G/U]GGGUGGCAGGCUGGCC	341	294	21	6.63237
67	hsa-miR-6732-3p	chr1	+	hsa-mir-6732	No	2	rs375363070	37480274	G > T	9e-06	8	UAACCCUGUCCUCUCCCUCCCAG	UAACCCUUUCCUCUCCCUCCCAG	hsa-miR-6732-3p,UAACCCU[G/U]UCCUCUCCCUCCCAG	384	413	128	32.1417
67	hsa-miR-6732-3p	chr1	+	hsa-mir-6732	No	2	rs746897159	37480270	C > T	3.5e-05	4	UAACCCUGUCCUCUCCCUCCCAG	UAAUCCUGUCCUCUCCCUCCCAG	hsa-miR-6732-3p,UAA[C/U]CCUGUCCUCUCCCUCCCAG	384	546	53	11.5748
68	hsa-miR-5581-5p	chr1	-	hsa-mir-5581	No	0
69	hsa-miR-5581-3p	chr1	-	hsa-mir-5581	No	0
70	hsa-miR-3659	chr1	+	hsa-mir-3659	No	0
71	hsa-miR-30e-5p	chr1	+	hsa-mir-30e	Yes (40754370-40757360:2:homo:hsa-mir-30e/hsa-mir-30c-1)	0
72	hsa-miR-30e-3p	chr1	+	hsa-mir-30e	Yes (40754370-40757360:2:homo:hsa-mir-30e/hsa-mir-30c-1)	2	rs373732123	40754417	C > T	0.000291	5	CUUUCAGUCGGAUGUUUACAGC	CUUUUAGUCGGAUGUUUACAGC	hsa-miR-30e-3p,CUUU[C/U]AGUCGGAUGUUUACAGC	1555	1692	500	30.8251
72	hsa-miR-30e-3p	chr1	+	hsa-mir-30e	Yes (40754370-40757360:2:homo:hsa-mir-30e/hsa-mir-30c-1)	2	rs367890071	40754418	A > G	8e-06	6	CUUUCAGUCGGAUGUUUACAGC	CUUUCGGUCGGAUGUUUACAGC	hsa-miR-30e-3p,CUUUC[A/G]GUCGGAUGUUUACAGC	1555	66	11	3.43365
73	hsa-miR-30c-5p	chr1	+	hsa-mir-30c-1	Yes (40754370-40757360:2:homo:hsa-mir-30e/hsa-mir-30c-1)	0
74	hsa-miR-30c-1-3p	chr1	+	hsa-mir-30c-1	Yes (40754370-40757360:2:homo:hsa-mir-30e/hsa-mir-30c-1)	0
75	hsa-miR-6733-5p	chr1	-	hsa-mir-6733	No	0
76	hsa-miR-6733-3p	chr1	-	hsa-mir-6733	No	2	rs757152736	43171670	G > A	1.7e-05	2	UCAGUGUCUGGAUUUCCUAG	UUAGUGUCUGGAUUUCCUAG	hsa-miR-6733-3p,U[C/U]AGUGUCUGGAUUUCCUAG	616	403	51	10.2359
76	hsa-miR-6733-3p	chr1	-	hsa-mir-6733	No	2	rs749311002	43171664	G > A	8e-06	8	UCAGUGUCUGGAUUUCCUAG	UCAGUGUUUGGAUUUCCUAG	hsa-miR-6733-3p,UCAGUGU[C/U]UGGAUUUCCUAG	616	848	314	43.4452
77	hsa-miR-6734-5p	chr1	-	hsa-mir-6734	No	0
78	hsa-miR-6734-3p	chr1	-	hsa-mir-6734	No	1	rs371478808	43364666	A > G	7.7e-05	5	CCCUUCCCUCACUCUUCUCUCAG	CCCUCCCCUCACUCUUCUCUCAG	hsa-miR-6734-3p,CCCU[U/C]CCCUCACUCUUCUCUCAG	1077	1398	305	24.8564
79	hsa-miR-6735-5p	chr1	+	hsa-mir-6735	No	2	rs772518910	43448546	G > C	8e-06	3	CAGGGCAGAGGGCACAGGAAUCUGA	CACGGCAGAGGGCACAGGAAUCUGA	hsa-miR-6735-5p,CA[G/C]GGCAGAGGGCACAGGAAUCUGA	591	57	3	1.63452
79	hsa-miR-6735-5p	chr1	+	hsa-mir-6735	No	2	rs776091746	43448548	G > T	8e-06	5	CAGGGCAGAGGGCACAGGAAUCUGA	CAGGUCAGAGGGCACAGGAAUCUGA	hsa-miR-6735-5p,CAGG[G/U]CAGAGGGCACAGGAAUCUGA	591	362	34	7.35074
80	hsa-miR-6735-3p	chr1	+	hsa-mir-6735	No	1	rs373864242	43448597	T > C	0.000127	8	AGGCCUGUGGCUCCUCCCUCAG	AGGCCUGCGGCUCCUCCCUCAG	hsa-miR-6735-3p,AGGCCUG[U/C]GGCUCCUCCCUCAG	481	587	273	51.3773
81	hsa-miR-6079	chr1	+	hsa-mir-6079	No	0
82	hsa-miR-5584-5p	chr1	+	hsa-mir-5584	No	0
83	hsa-miR-5584-3p	chr1	+	hsa-mir-5584	No	0
84	hsa-miR-4421	chr1	+	hsa-mir-4421	Yes (51059878-51060092:2:hetero:hsa-mir-4421/hsa-mir-6500)	0
85	hsa-miR-6500-5p	chr1	+	hsa-mir-6500	Yes (51059878-51060092:2:hetero:hsa-mir-4421/hsa-mir-6500)	0
86	hsa-miR-6500-3p	chr1	+	hsa-mir-6500	Yes (51059878-51060092:2:hetero:hsa-mir-4421/hsa-mir-6500)	0
87	hsa-miR-761	chr1	-	hsa-mir-761	No	1	rs745626795	51836392	G > A	8e-06	5	GCAGCAGGGUGAAACUGACACA	GCAGUAGGGUGAAACUGACACA	hsa-miR-761,GCAG[C/U]AGGGUGAAACUGACACA	1071	378	72	11.316
88	hsa-miR-1273f	chr1	+	hsa-mir-1273f	Yes (52928697-52940390:3:HHC:hsa-mir-1273f/hsa-mir-5095/hsa-mir-1273g)	0
89	hsa-miR-5095	chr1	+	hsa-mir-5095	Yes (52928697-52940390:3:HHC:hsa-mir-1273f/hsa-mir-5095/hsa-mir-1273g)	0
90	hsa-miR-1273g-5p	chr1	+	hsa-mir-1273g	Yes (52928697-52940390:3:HHC:hsa-mir-1273f/hsa-mir-5095/hsa-mir-1273g)	0
91	hsa-miR-1273g-3p	chr1	+	hsa-mir-1273g	Yes (52928697-52940390:3:HHC:hsa-mir-1273f/hsa-mir-5095/hsa-mir-1273g)	0
92	hsa-miR-4781-5p	chr1	+	hsa-mir-4781	No	0
93	hsa-miR-4781-3p	chr1	+	hsa-mir-4781	No	2	rs550946107	54054131	G > A	0.0002	8	AAUGUUGGAAUCCUCGCUAGAG	AAUGUUGAAAUCCUCGCUAGAG	hsa-miR-4781-3p,AAUGUUG[G/A]AAUCCUCGCUAGAG	435	584	213	42.2599
93	hsa-miR-4781-3p	chr1	+	hsa-mir-4781	No	2	rs74085143	54054127	G > A	0.117009	4	AAUGUUGGAAUCCUCGCUAGAG	AAUAUUGGAAUCCUCGCUAGAG	hsa-miR-4781-3p,AAU[G/A]UUGGAAUCCUCGCUAGAG	435	548	64	13.1083
94	hsa-miR-4422	chr1	+	hsa-mir-4422	No	0
95	hsa-miR-4711-5p	chr1	-	hsa-mir-4711	No	0
96	hsa-miR-4711-3p	chr1	-	hsa-mir-4711	No	0
97	hsa-miR-3116	chr1	+	hsa-mir-3116-1	No	1	rs192207383	62078831	G > A	0.000459	2	UGCCUGGAACAUAGUAGGGACU	UACCUGGAACAUAGUAGGGACU	hsa-miR-3116,U[G/A]CCUGGAACAUAGUAGGGACU	740	382	57	10.7208
98	hsa-miR-3116	chr1	-	hsa-mir-3116-2	No	1	rs547085593	62078814	C > T	0.000998	2	UGCCUGGAACAUAGUAGGGACU	UACCUGGAACAUAGUAGGGACU	hsa-miR-3116,U[G/A]CCUGGAACAUAGUAGGGACU	740	382	57	10.7208
99	hsa-miR-6068	chr1	-	hsa-mir-6068	No	0
100	hsa-miR-4794	chr1	+	hsa-mir-4794	No	0
101	hsa-miR-3671	chr1	-	hsa-mir-3671	Yes (65057761-65058498:2:hetero:hsa-mir-3671/hsa-mir-101)	1	rs556125315	65057782	A > C	0.000305	2	AUCAAAUAAGGACUAGUCUGCA	AGCAAAUAAGGACUAGUCUGCA	hsa-miR-3671,A[U/G]CAAAUAAGGACUAGUCUGCA	1955	1268	466	29.5974
102	hsa-miR-101-5p	chr1	-	hsa-mir-101-1	Yes (65057761-65058498:2:hetero:hsa-mir-3671/hsa-mir-101)	2	rs777575128	65058491	G > C	8e-06	8	CAGUUAUCACAGUGCUGAUGCU	CAGUUAUGACAGUGCUGAUGCU	hsa-miR-101-5p,CAGUUAU[C/G]ACAGUGCUGAUGCU	585	586	300	51.2383
102	hsa-miR-101-5p	chr1	-	hsa-mir-101-1	Yes (65057761-65058498:2:hetero:hsa-mir-3671/hsa-mir-101)	2	rs746487797	65058492	A > G	1.7e-05	7	CAGUUAUCACAGUGCUGAUGCU	CAGUUACCACAGUGCUGAUGCU	hsa-miR-101-5p,CAGUUA[U/C]CACAGUGCUGAUGCU	585	432	69	13.7255
103	hsa-miR-101-3p	chr1	-	hsa-mir-101-1	Yes (65057761-65058498:2:hetero:hsa-mir-3671/hsa-mir-101)	0
104	hsa-miR-3117-3p	chr1	+	hsa-mir-3117	No	2	rs774064225	66628490	A > G	0.000655	6	AUAGGACUCAUAUAGUGCCAG	AUAGGGCUCAUAUAGUGCCAG	hsa-miR-3117-3p,AUAGG[A/G]CUCAUAUAGUGCCAG	249	196	6	2.71596
104	hsa-miR-3117-3p	chr1	+	hsa-mir-3117	No	2	rs12402181	66628488	G > A	0.27592	4	AUAGGACUCAUAUAGUGCCAG	AUAAGACUCAUAUAGUGCCAG	hsa-miR-3117-3p,AUA[G/A]GACUCAUAUAGUGCCAG	249	583	34	8.9237
105	hsa-miR-3117-5p	chr1	+	hsa-mir-3117	No	0
106	hsa-miR-1262	chr1	-	hsa-mir-1262	No	1	rs758437066	68183591	C > T	9e-06	7	AUGGGUGAAUUUGUAGAAGGAU	AUGGGUAAAUUUGUAGAAGGAU	hsa-miR-1262,AUGGGU[G/A]AAUUUGUAGAAGGAU	441	373	26	6.41061
107	hsa-miR-186-5p	chr1	-	hsa-mir-186	No	1	rs749991806	71067698	C > G	4.3e-05	5	CAAAGAAUUCUCCUUUUGGGCU	CAAACAAUUCUCCUUUUGGGCU	hsa-miR-186-5p,CAAA[G/C]AAUUCUCCUUUUGGGCU	2628	2834	1296	47.4889
108	hsa-miR-186-3p	chr1	-	hsa-mir-186	No	0
109	hsa-miR-7156-5p	chr1	+	hsa-mir-7156	No	0
110	hsa-miR-7156-3p	chr1	+	hsa-mir-7156	No	0
111	hsa-miR-4423-5p	chr1	+	hsa-mir-4423	No	0
112	hsa-miR-4423-3p	chr1	+	hsa-mir-4423	No	1	rs144289108	85133843	T > C	0.002196	2	AUAGGCACCAAAAAGCAACAA	ACAGGCACCAAAAAGCAACAA	hsa-miR-4423-3p,A[U/C]AGGCACCAAAAAGCAACAA	387	842	50	8.75908
113	hsa-miR-7856-5p	chr1	-	hsa-mir-7856	No	0
114	hsa-miR-760	chr1	+	hsa-mir-760	No	3	rs746002336	93846885	C > A	7.5e-05	6	CGGCUCUGGGUCUGUGGGGA	CGGCUAUGGGUCUGUGGGGA	hsa-miR-760,CGGCU[C/A]UGGGUCUGUGGGGA	662	272	30	7.06981
114	hsa-miR-760	chr1	+	hsa-mir-760	No	3	rs777843882	93846883	C > T	0.000126	4	CGGCUCUGGGUCUGUGGGGA	CGGUUCUGGGUCUGUGGGGA	hsa-miR-760,CGG[C/U]UCUGGGUCUGUGGGGA	662	462	47	8.49861
114	hsa-miR-760	chr1	+	hsa-mir-760	No	3	rs569643928	93846886	T > A	0.0002	7	CGGCUCUGGGUCUGUGGGGA	CGGCUCAGGGUCUGUGGGGA	hsa-miR-760,CGGCUC[U/A]GGGUCUGUGGGGA	662	630	75	11.6135
115	hsa-miR-378g	chr1	-	hsa-mir-378g	No	0
116	hsa-miR-2682-5p	chr1	-	hsa-mir-2682	Yes (98045270-98046113:2:hetero:hsa-mir-2682/hsa-mir-137)	0
117	hsa-miR-2682-3p	chr1	-	hsa-mir-2682	Yes (98045270-98046113:2:hetero:hsa-mir-2682/hsa-mir-137)	1	rs74904371	98045291	C > T	0.021819	2	CGCCUCUUCAGCGCUGUCUUCC	CACCUCUUCAGCGCUGUCUUCC	hsa-miR-2682-3p,C[G/A]CCUCUUCAGCGCUGUCUUCC	517	437	48	10.0985
118	hsa-miR-137	chr1	-	hsa-mir-137	Yes (98045270-98046113:2:hetero:hsa-mir-2682/hsa-mir-137)	0
119	hsa-miR-553	chr1	+	hsa-mir-553	No	2	rs755274212	100281260	C > T	1.7e-05	5	AAAACGGUGAGAUUUUGUUUU	AAAAUGGUGAGAUUUUGUUUU	hsa-miR-553,AAAA[C/U]GGUGAGAUUUUGUUUU	70	1176	17	5.92511
119	hsa-miR-553	chr1	+	hsa-mir-553	No	2	rs190622705	100281258	A > G	0.000374	3	AAAACGGUGAGAUUUUGUUUU	AAGACGGUGAGAUUUUGUUUU	hsa-miR-553,AA[A/G]ACGGUGAGAUUUUGUUUU	70	35	1	2.02031
120	hsa-miR-7852-3p	chr1	+	hsa-mir-7852	No	0
121	hsa-miR-197-3p	chr1	+	hsa-mir-197	No	0
122	hsa-miR-197-5p	chr1	+	hsa-mir-197	No	2	rs750451025	109598902	G > A	8e-06	2	CGGGUAGAGAGGGCAGUGGGAGG	CAGGUAGAGAGGGCAGUGGGAGG	hsa-miR-197-5p,C[G/A]GGUAGAGAGGGCAGUGGGAGG	274	379	11	3.41348
122	hsa-miR-197-5p	chr1	+	hsa-mir-197	No	2	rs756216514	109598907	G > C	8e-06	7	CGGGUAGAGAGGGCAGUGGGAGG	CGGGUACAGAGGGCAGUGGGAGG	hsa-miR-197-5p,CGGGUA[G/C]AGAGGGCAGUGGGAGG	274	243	5	1.93772
123	hsa-miR-4256	chr1	-	hsa-mir-4256	No	0
124	hsa-miR-548ac	chr1	-	hsa-mir-548ac	No	1	rs556579863	116560052	G > A	0.0002	8	CAAAAACCGGCAAUUACUUUUG	CAAAAACUGGCAAUUACUUUUG	hsa-miR-548ac,CAAAAAC[C/U]GGCAAUUACUUUUG	2820	2921	2149	74.8766
125	hsa-miR-320b	chr1	+	hsa-mir-320b-1	No	0
126	hsa-miR-942-5p	chr1	+	hsa-mir-942	No	0
127	hsa-miR-942-3p	chr1	+	hsa-mir-942	No	1	rs768381092	117094698	A > G	9e-06	4	CACAUGGCCGAAACAGAGAAGU	CACGUGGCCGAAACAGAGAAGU	hsa-miR-942-3p,CAC[A/G]UGGCCGAAACAGAGAAGU	575	90	8	3.5167
128	hsa-miR-6736-5p	chr1	-	hsa-mir-6736	No	0
129	hsa-miR-6736-3p	chr1	-	hsa-mir-6736	No	4	rs372992145	145850603	> T	9.6e-05	5	UCAGCUCCUCUCUACCCACAG	UCAGAUCCUCUCUACCCACAG	hsa-miR-6736-3p,UCAG[/A]UCCUCUCUACCCACAG	717	339	43	8.72186
129	hsa-miR-6736-3p	chr1	-	hsa-mir-6736	No	4	rs782709755	145850606	> T	8e-06	2	UCAGCUCCUCUCUACCCACAG	UAAGCUCCUCUCUACCCACAG	hsa-miR-6736-3p,U[/A]AGCUCCUCUCUACCCACAG	717	363	38	7.44853
129	hsa-miR-6736-3p	chr1	-	hsa-mir-6736	No	4	rs139309317	145850601	> T	0.000946	7	UCAGCUCCUCUCUACCCACAG	UCAGCUACUCUCUACCCACAG	hsa-miR-6736-3p,UCAGCU[/A]CUCUCUACCCACAG	717	647	72	10.5711
129	hsa-miR-6736-3p	chr1	-	hsa-mir-6736	No	4	rs782751082	145850600	G > C	3.3e-05	8	UCAGCUCCUCUCUACCCACAG	UCAGCUCGUCUCUACCCACAG	hsa-miR-6736-3p,UCAGCUC[C/G]UCUCUACCCACAG	717	266	213	48.773
130	hsa-miR-5087	chr1	-	hsa-mir-5087	No	0
131	hsa-miR-6077	chr1	+	hsa-mir-6077	No	0
132	hsa-miR-6878-5p	chr1	+	hsa-mir-6878	No	1	rs752833046	150492355	G > C	8e-06	6	AGGGAGAAAGCUAGAAGCUGAAG	AGGGACAAAGCUAGAAGCUGAAG	hsa-miR-6878-5p,AGGGA[G/C]AAAGCUAGAAGCUGAAG	1047	518	106	14.3935
133	hsa-miR-6878-3p	chr1	+	hsa-mir-6878	No	1	rs746185664	150492396	T > C	8e-06	7	CUGGCCUCUUCUUUCUCCUAG	CUGGCCCCUUCUUUCUCCUAG	hsa-miR-6878-3p,CUGGCC[U/C]CUUCUUUCUCCUAG	1047	444	74	10.8534
134	hsa-miR-4257	chr1	+	hsa-mir-4257	No	1	rs74743733	150551992	G > A	0.009522	6	CCAGAGGUGGGGACUGAG	CCAGAAGUGGGGACUGAG	hsa-miR-4257,CCAGA[G/A]GUGGGGACUGAG	880	975	173	18.6768
135	hsa-miR-554	chr1	+	hsa-mir-554	No	0
136	hsa-miR-8083	chr1	-	hsa-mir-8083	No	1	rs760506586	153689782	T > C	8e-06	2	CAGGACUUGACGGCUGCAACU	CGGGACUUGACGGCUGCAACU	hsa-miR-8083,C[A/G]GGACUUGACGGCUGCAACU	380	277	19	5.85628
137	hsa-miR-6737-5p	chr1	-	hsa-mir-6737	No	1	rs766338599	153962412	C > A	9e-06	4	UUGGGGUGGUCGGCCCUGGAG	UUGUGGUGGUCGGCCCUGGAG	hsa-miR-6737-5p,UUG[G/U]GGUGGUCGGCCCUGGAG	550	422	43	8.92547
138	hsa-miR-6737-3p	chr1	-	hsa-mir-6737	No	1	rs374574755	153962365	A > G	8e-06	8	UCUGUGCUUCACCCCUACCCAG	UCUGUGCCUCACCCCUACCCAG	hsa-miR-6737-3p,UCUGUGC[U/C]UCACCCCUACCCAG	602	527	201	35.6856
139	hsa-miR-5698	chr1	-	hsa-mir-5698	No	0
140	hsa-miR-190b	chr1	-	hsa-mir-190b	No	0
141	hsa-miR-4258	chr1	+	hsa-mir-4258	No	0
142	hsa-miR-92b-5p	chr1	+	hsa-mir-92b	No	0
143	hsa-miR-92b-3p	chr1	+	hsa-mir-92b	No	0
144	hsa-miR-555	chr1	-	hsa-mir-555	No	0
145	hsa-miR-6738-5p	chr1	-	hsa-mir-6738	No	2	rs747850051	155951330	C > T	1.2e-05	2	CGAGGGGUAGAAGAGCACAGGGG	CAAGGGGUAGAAGAGCACAGGGG	hsa-miR-6738-5p,C[G/A]AGGGGUAGAAGAGCACAGGGG	600	416	76	15.2122
145	hsa-miR-6738-5p	chr1	-	hsa-mir-6738	No	2	rs761926689	155951328	C > G	1.2e-05	4	CGAGGGGUAGAAGAGCACAGGGG	CGACGGGUAGAAGAGCACAGGGG	hsa-miR-6738-5p,CGA[G/C]GGGUAGAAGAGCACAGGGG	600	35	8	5.52052
146	hsa-miR-6738-3p	chr1	-	hsa-mir-6738	No	0
147	hsa-miR-9-5p	chr1	-	hsa-mir-9-1	No	0
148	hsa-miR-9-3p	chr1	-	hsa-mir-9-1	No	0
149	hsa-miR-765	chr1	-	hsa-mir-765	No	1	rs764994469	156936175	C > T	3.3e-05	2	UGGAGGAGAAGGAAGGUGAUG	UAGAGGAGAAGGAAGGUGAUG	hsa-miR-765,U[G/A]GAGGAGAAGGAAGGUGAUG	898	721	164	20.3816
150	hsa-miR-4259	chr1	-	hsa-mir-4259	No	1	rs772339482	159900003	C > T	2.7e-05	8	CAGUUGGGUCUAGGGGUCAGGA	CAGUUGGAUCUAGGGGUCAGGA	hsa-miR-4259,CAGUUGG[G/A]UCUAGGGGUCAGGA	282	334	103	33.5614
151	hsa-miR-5187-5p	chr1	+	hsa-mir-5187	No	1	rs770116729	161227201	G > A	9e-06	7	UGGGAUGAGGGAUUGAAGUGGA	UGGGAUAAGGGAUUGAAGUGGA	hsa-miR-5187-5p,UGGGAU[G/A]AGGGAUUGAAGUGGA	422	328	31	8.33237
152	hsa-miR-5187-3p	chr1	+	hsa-mir-5187	No	0
153	hsa-miR-4654	chr1	+	hsa-mir-4654	No	0
154	hsa-miR-556-5p	chr1	+	hsa-mir-556	No	0
155	hsa-miR-556-3p	chr1	+	hsa-mir-556	No	1	rs750139933	162342607	C > T	3.4e-05	8	AUAUUACCAUUAGCUCAUCUUU	AUAUUACUAUUAGCUCAUCUUU	hsa-miR-556-3p,AUAUUAC[C/U]AUUAGCUCAUCUUU	701	930	378	46.8157
156	hsa-miR-3658	chr1	+	hsa-mir-3658	No	0
157	hsa-miR-921	chr1	-	hsa-mir-921	No	1	rs768428855	166154790	C > T	8e-06	8	CUAGUGAGGGACAGAACCAGGAUUC	CUAGUGAAGGACAGAACCAGGAUUC	hsa-miR-921,CUAGUGA[G/A]GGACAGAACCAGGAUUC	318	540	152	36.6803
158	hsa-miR-1255b-5p	chr1	+	hsa-mir-1255b-2	No	1	rs189709980	167998666	G > C	0.000399	2	CGGAUGAGCAAAGAAAGUGGUU	CCGAUGAGCAAAGAAAGUGGUU	hsa-miR-1255b-5p,C[G/C]GAUGAGCAAAGAAAGUGGUU	340	40	3	2.57248
159	hsa-miR-1255b-2-3p	chr1	+	hsa-mir-1255b-2	No	1	rs765856852	167998702	C > T	0.000468	4	AACCACUUUCUUUGCUCAUCCA	AACUACUUUCUUUGCUCAUCCA	hsa-miR-1255b-2-3p,AAC[C/U]ACUUUCUUUGCUCAUCCA	517	520	78	15.0435
160	hsa-miR-557	chr1	+	hsa-mir-557	No	1	rs78825966	168375591	C > T	0.018392	8	GUUUGCACGGGUGGGCCUUGUCU	GUUUGCAUGGGUGGGCCUUGUCU	hsa-miR-557,GUUUGCA[C/U]GGGUGGGCCUUGUCU	1005	1320	663	57.563
161	hsa-miR-3119	chr1	-	hsa-mir-3119-1	No	1	rs537840374	170151453	C > T	0.000399	2	UGGCUUUUAACUUUGAUGGC	UAGCUUUUAACUUUGAUGGC	hsa-miR-3119,U[G/A]GCUUUUAACUUUGAUGGC	961	1039	182	18.2139
162	hsa-miR-3119	chr1	+	hsa-mir-3119-2	No	0
163	hsa-miR-1295a	chr1	-	hsa-mir-1295a	No	3	rs777212148	171101757	A > C	1.8e-05	2	UUAGGCCGCAGAUCUGGGUGA	UGAGGCCGCAGAUCUGGGUGA	hsa-miR-1295a,U[U/G]AGGCCGCAGAUCUGGGUGA	46	269	3	2.69691
163	hsa-miR-1295a	chr1	-	hsa-mir-1295a	No	3	rs747377208	171101751	C > T	1.8e-05	8	UUAGGCCGCAGAUCUGGGUGA	UUAGGCCACAGAUCUGGGUGA	hsa-miR-1295a,UUAGGCC[G/A]CAGAUCUGGGUGA	46	230	23	22.3607
163	hsa-miR-1295a	chr1	-	hsa-mir-1295a	No	3	rs771267734	171101752	G > A	1.8e-05	7	UUAGGCCGCAGAUCUGGGUGA	UUAGGCUGCAGAUCUGGGUGA	hsa-miR-1295a,UUAGGC[C/U]GCAGAUCUGGGUGA	46	294	5	4.29949
164	hsa-miR-1295b-5p	chr1	+	hsa-mir-1295b	No	1	rs777896523	171101742	C > A	1.8e-05	4	CACCCAGAUCUGCGGCCUAAU	CACACAGAUCUGCGGCCUAAU	hsa-miR-1295b-5p,CAC[C/A]CAGAUCUGCGGCCUAAU	518	1468	139	15.9399
165	hsa-miR-1295b-3p	chr1	+	hsa-mir-1295b	No	2	rs774033099	171101779	T > C	2e-05	3	AAUAGGCCACGGAUCUGGGCAA	AACAGGCCACGGAUCUGGGCAA	hsa-miR-1295b-3p,AA[U/C]AGGCCACGGAUCUGGGCAA	167	457	14	5.06771
165	hsa-miR-1295b-3p	chr1	+	hsa-mir-1295b	No	2	rs373340854	171101780	A > C	2e-05	4	AAUAGGCCACGGAUCUGGGCAA	AAUCGGCCACGGAUCUGGGCAA	hsa-miR-1295b-3p,AAU[A/C]GGCCACGGAUCUGGGCAA	167	22	1	1.6498
166	hsa-miR-214-5p	chr1	-	hsa-mir-214	Yes (172138815-172144614:2:hetero:hsa-mir-214/hsa-mir-199a)	0
167	hsa-miR-214-3p	chr1	-	hsa-mir-214	Yes (172138815-172144614:2:hetero:hsa-mir-214/hsa-mir-199a)	1	rs754055278	172138831	C > T	0.0001	7	ACAGCAGGCACAGACAGGCAGU	ACAGCAAGCACAGACAGGCAGU	hsa-miR-214-3p,ACAGCA[G/A]GCACAGACAGGCAGU	1071	857	167	17.4314
168	hsa-miR-3120-3p	chr1	+	hsa-mir-3120	Yes (172138815-172144614:2:hetero:hsa-mir-214/hsa-mir-199a)	1	rs755676659	172138865	A > G	8.7e-05	8	CACAGCAAGUGUAGACAGGCA	CACAGCAGGUGUAGACAGGCA	hsa-miR-3120-3p,CACAGCA[A/G]GUGUAGACAGGCA	1260	1092	596	50.8101
169	hsa-miR-3120-5p	chr1	+	hsa-mir-3120	Yes (172138815-172144614:2:hetero:hsa-mir-214/hsa-mir-199a)	1	rs750386761	172138827	G > A	0.000106	8	CCUGUCUGUGCCUGCUGUACA	CCUGUCUAUGCCUGCUGUACA	hsa-miR-3120-5p,CCUGUCU[G/A]UGCCUGCUGUACA	638	503	266	46.9556
170	hsa-miR-199a-5p	chr1	-	hsa-mir-199a-2	Yes (172138815-172144614:2:hetero:hsa-mir-214/hsa-mir-199a)	0
171	hsa-miR-199a-3p	chr1	-	hsa-mir-199a-2	Yes (172138815-172144614:2:hetero:hsa-mir-214/hsa-mir-199a)	0
172	hsa-miR-488-5p	chr1	-	hsa-mir-488	No	1	rs199722070	177029428	C > T	1.4e-05	5	CCCAGAUAAUGGCACUCUCAA	CCCAAAUAAUGGCACUCUCAA	hsa-miR-488-5p,CCCA[G/A]AUAAUGGCACUCUCAA	520	1304	128	15.5442
173	hsa-miR-488-3p	chr1	-	hsa-mir-488	No	0
174	hsa-miR-4424	chr1	+	hsa-mir-4424	No	0
175	hsa-miR-3121-3p	chr1	-	hsa-mir-3121	No	0
176	hsa-miR-3121-5p	chr1	-	hsa-mir-3121	No	1	rs567702584	180438377	G > T	0.000309	3	UCCUUUGCCUAUUCUAUUUAAG	UCAUUUGCCUAUUCUAUUUAAG	hsa-miR-3121-5p,UC[C/A]UUUGCCUAUUCUAUUUAAG	669	1036	136	16.336
177	hsa-miR-4426	chr1	+	hsa-mir-4426	No	0
178	hsa-miR-1278	chr1	+	hsa-mir-1278	No	1	rs767883569	193136558	T > C	3.5e-05	7	UAGUACUGUGCAUAUCAUCUAU	UAGUACCGUGCAUAUCAUCUAU	hsa-miR-1278,UAGUAC[U/C]GUGCAUAUCAUCUAU	405	65	9	5.547
179	hsa-miR-4735-5p	chr1	-	hsa-mir-4735	No	0
180	hsa-miR-4735-3p	chr1	-	hsa-mir-4735	No	0
181	hsa-miR-181b-5p	chr1	-	hsa-mir-181b-1	Yes (198858886-198859130:2:homo:hsa-mir-181b/hsa-mir-181a)	0
182	hsa-miR-181b-3p	chr1	-	hsa-mir-181b-1	Yes (198858886-198859130:2:homo:hsa-mir-181b/hsa-mir-181a)	1	rs749178105	198858904	T > C	8e-06	4	CUCACUGAACAAUGAAUGCAA	CUCGCUGAACAAUGAAUGCAA	hsa-miR-181b-3p,CUC[A/G]CUGAACAAUGAAUGCAA	971	41	6	3.00711
183	hsa-miR-181a-5p	chr1	-	hsa-mir-181a-1	Yes (198858886-198859130:2:homo:hsa-mir-181b/hsa-mir-181a)	0
184	hsa-miR-181a-3p	chr1	-	hsa-mir-181a-1	Yes (198858886-198859130:2:homo:hsa-mir-181b/hsa-mir-181a)	0
185	hsa-miR-5191	chr1	+	hsa-mir-5191	No	0
186	hsa-miR-1231	chr1	+	hsa-mir-1231	No	1	rs768024461	201808617	G > A	8e-06	3	GUGUCUGGGCGGACAGCUGC	GUAUCUGGGCGGACAGCUGC	hsa-miR-1231,GU[G/A]UCUGGGCGGACAGCUGC	443	514	56	11.7356
187	hsa-miR-6739-5p	chr1	+	hsa-mir-6739	No	0
188	hsa-miR-6739-3p	chr1	+	hsa-mir-6739	No	2	rs772224959	201863428	T > C	8e-06	2	AUUGUUCUGUCUUUCUCCCAG	ACUGUUCUGUCUUUCUCCCAG	hsa-miR-6739-3p,A[U/C]UGUUCUGUCUUUCUCCCAG	916	588	103	14.0346
188	hsa-miR-6739-3p	chr1	+	hsa-mir-6739	No	2	rs184389099	201863431	T > C	8.8e-05	5	AUUGUUCUGUCUUUCUCCCAG	AUUGCUCUGUCUUUCUCCCAG	hsa-miR-6739-3p,AUUG[U/C]UCUGUCUUUCUCCCAG	916	684	105	13.2652
189	hsa-miR-6740-5p	chr1	+	hsa-mir-6740	No	0
190	hsa-miR-6740-3p	chr1	+	hsa-mir-6740	No	0
191	hsa-miR-135b-5p	chr1	-	hsa-mir-135b	No	0
192	hsa-miR-135b-3p	chr1	-	hsa-mir-135b	No	1	rs754996889	205448343	A > G	8e-06	2	AUGUAGGGCUAAAAGCCAUGGG	ACGUAGGGCUAAAAGCCAUGGG	hsa-miR-135b-3p,A[U/C]GUAGGGCUAAAAGCCAUGGG	257	22	1	1.32991
193	hsa-miR-6769b-5p	chr1	+	hsa-mir-6769b	No	2	rs782195276	206474812	G > A	2e-05	5	UGGUGGGUGGGGAGGAGAAGUGC	UGGUAGGUGGGGAGGAGAAGUGC	hsa-miR-6769b-5p,UGGU[G/A]GGUGGGGAGGAGAAGUGC	732	234	27	6.52379
193	hsa-miR-6769b-5p	chr1	+	hsa-mir-6769b	No	2	rs781854643	206474809	G > C	5.1e-05	2	UGGUGGGUGGGGAGGAGAAGUGC	UCGUGGGUGGGGAGGAGAAGUGC	hsa-miR-6769b-5p,U[G/C]GUGGGUGGGGAGGAGAAGUGC	732	69	15	6.67438
194	hsa-miR-6769b-3p	chr1	+	hsa-mir-6769b	No	3	rs782102173	206474847	T > G	8e-06	4	CCCUCUCUGUCCCACCCAUAG	CCCGCUCUGUCCCACCCAUAG	hsa-miR-6769b-3p,CCC[U/G]CUCUGUCCCACCCAUAG	719	35	6	3.78227
194	hsa-miR-6769b-3p	chr1	+	hsa-mir-6769b	No	3	rs201952639	206474850	C > T	5.7e-05	7	CCCUCUCUGUCCCACCCAUAG	CCCUCUUUGUCCCACCCAUAG	hsa-miR-6769b-3p,CCCUCU[C/U]UGUCCCACCCAUAG	719	820	118	15.3678
194	hsa-miR-6769b-3p	chr1	+	hsa-mir-6769b	No	3	rs555627187	206474846	C > T	8e-06	3	CCCUCUCUGUCCCACCCAUAG	CCUUCUCUGUCCCACCCAUAG	hsa-miR-6769b-3p,CC[C/U]UCUCUGUCCCACCCAUAG	719	1016	135	15.7951
195	hsa-miR-29c-5p	chr1	-	hsa-mir-29c	Yes (207801864-207802513:2:homo:hsa-mir-29c/hsa-mir-29b-2)	1	rs765557367	207801922	T > C	0.001341	3	UGACCGAUUUCUCCUGGUGUUC	UGGCCGAUUUCUCCUGGUGUUC	hsa-miR-29c-5p,UG[A/G]CCGAUUUCUCCUGGUGUUC	12	27	0	0
196	hsa-miR-29c-3p	chr1	-	hsa-mir-29c	Yes (207801864-207802513:2:homo:hsa-mir-29c/hsa-mir-29b-2)	0
197	hsa-miR-29b-3p	chr1	-	hsa-mir-29b-2	Yes (207801864-207802513:2:homo:hsa-mir-29c/hsa-mir-29b-2)	0
198	hsa-miR-29b-2-5p	chr1	-	hsa-mir-29b-2	Yes (207801864-207802513:2:homo:hsa-mir-29c/hsa-mir-29b-2)	0
199	hsa-miR-205-5p	chr1	+	hsa-mir-205	No	0
200	hsa-miR-205-3p	chr1	+	hsa-mir-205	No	1	rs760737889	209432205	T > C	8e-06	3	GAUUUCAGUGGAGUGAAGUUC	GACUUCAGUGGAGUGAAGUUC	hsa-miR-205-3p,GA[U/C]UUCAGUGGAGUGAAGUUC	1968	828	343	26.8699
201	hsa-miR-4260	chr1	-	hsa-mir-4260	No	1	rs372999583	209623499	A > G	7.7e-05	2	CUUGGGGCAUGGAGUCCCA	CCUGGGGCAUGGAGUCCCA	hsa-miR-4260,C[U/C]UGGGGCAUGGAGUCCCA	592	1115	142	17.4779
202	hsa-miR-3122	chr1	+	hsa-mir-3122	No	1	rs774206730	212077623	T > C	0.000708	2	GUUGGGACAAGAGGACGGUCUU	GCUGGGACAAGAGGACGGUCUU	hsa-miR-3122,G[U/C]UGGGACAAGAGGACGGUCUU	516	892	86	12.6763
203	hsa-miR-215-5p	chr1	-	hsa-mir-215	Yes (220117876-220118227:2:hetero:hsa-mir-215/hsa-mir-194)	0
204	hsa-miR-215-3p	chr1	-	hsa-mir-215	Yes (220117876-220118227:2:hetero:hsa-mir-215/hsa-mir-194)	1	rs768393822	220117898	G > A	1.1e-05	2	UCUGUCAUUUCUUUAGGCCAAUA	UUUGUCAUUUCUUUAGGCCAAUA	hsa-miR-215-3p,U[C/U]UGUCAUUUCUUUAGGCCAAUA	673	771	111	15.4095
205	hsa-miR-194-5p	chr1	-	hsa-mir-194-1	Yes (220117876-220118227:2:hetero:hsa-mir-215/hsa-mir-194)	0
206	hsa-miR-664a-5p	chr1	-	hsa-mir-664a	No	0
207	hsa-miR-664a-3p	chr1	-	hsa-mir-664a	No	0
208	hsa-miR-320b	chr1	-	hsa-mir-320b-2	No	1	rs774951709	224257069	T > C	9e-06	2	AAAAGCUGGGUUGAGAGGGCAA	AGAAGCUGGGUUGAGAGGGCAA	hsa-miR-320b,A[A/G]AAGCUGGGUUGAGAGGGCAA	1097	583	129	16.1307
209	hsa-miR-4742-5p	chr1	-	hsa-mir-4742	No	0
210	hsa-miR-4742-3p	chr1	-	hsa-mir-4742	No	0
211	hsa-miR-6741-5p	chr1	-	hsa-mir-6741	No	2	rs142139864	225922135	C > T	0.000276	3	GUGGGUGCUGGUGGGAGCCGUG	GUAGGUGCUGGUGGGAGCCGUG	hsa-miR-6741-5p,GU[G/A]GGUGCUGGUGGGAGCCGUG	382	206	12	4.27776
211	hsa-miR-6741-5p	chr1	-	hsa-mir-6741	No	2	rs751426926	225922131	C > T	8e-06	7	GUGGGUGCUGGUGGGAGCCGUG	GUGGGUACUGGUGGGAGCCGUG	hsa-miR-6741-5p,GUGGGU[G/A]CUGGUGGGAGCCGUG	382	263	12	3.78592
212	hsa-miR-6741-3p	chr1	-	hsa-mir-6741	No	4	rs374893763	225922100	G > A	8e-05	2	UCGGCUCUCUCCCUCACCCUAG	UUGGCUCUCUCCCUCACCCUAG	hsa-miR-6741-3p,U[C/U]GGCUCUCUCCCUCACCCUAG	47	206	2	2.03258
212	hsa-miR-6741-3p	chr1	-	hsa-mir-6741	No	4	rs371412733	225922098	C > A	9e-06	4	UCGGCUCUCUCCCUCACCCUAG	UCGUCUCUCUCCCUCACCCUAG	hsa-miR-6741-3p,UCG[G/U]CUCUCUCCCUCACCCUAG	47	58	0	0
212	hsa-miR-6741-3p	chr1	-	hsa-mir-6741	No	4	rs369106712	225922097	G > A	9e-06	5	UCGGCUCUCUCCCUCACCCUAG	UCGGUUCUCUCCCUCACCCUAG	hsa-miR-6741-3p,UCGG[C/U]UCUCUCCCUCACCCUAG	47	38	1	2.36624
212	hsa-miR-6741-3p	chr1	-	hsa-mir-6741	No	4	rs773608143	225922099	C > T	3.5e-05	3	UCGGCUCUCUCCCUCACCCUAG	UCAGCUCUCUCCCUCACCCUAG	hsa-miR-6741-3p,UC[G/A]GCUCUCUCCCUCACCCUAG	47	593	6	3.59397
213	hsa-miR-5008-5p	chr1	-	hsa-mir-5008	No	0
214	hsa-miR-5008-3p	chr1	-	hsa-mir-5008	No	1	rs573889664	227941625	C > A	0.001198	6	CCUGUGCUCCCAGGGCCUCGC	CCUGUUCUCCCAGGGCCUCGC	hsa-miR-5008-3p,CCUGU[G/U]CUCCCAGGGCCUCGC	602	588	68	11.4294
215	hsa-miR-3620-3p	chr1	+	hsa-mir-3620	No	0
216	hsa-miR-3620-5p	chr1	+	hsa-mir-3620	No	2	rs758944972	228097291	T > C	8e-06	7	GUGGGCUGGGCUGGGCUGGGCC	GUGGGCCGGGCUGGGCUGGGCC	hsa-miR-3620-5p,GUGGGC[U/C]GGGCUGGGCUGGGCC	452	181	25	8.7404
216	hsa-miR-3620-5p	chr1	+	hsa-mir-3620	No	2	rs2070960	228097290	C > T	0.087697	6	GUGGGCUGGGCUGGGCUGGGCC	GUGGGUUGGGCUGGGCUGGGCC	hsa-miR-3620-5p,GUGGG[C/U]UGGGCUGGGCUGGGCC	452	332	36	9.29318
217	hsa-miR-6742-5p	chr1	-	hsa-mir-6742	No	0
218	hsa-miR-6742-3p	chr1	-	hsa-mir-6742	No	1	rs138408187	228397061	C > T	0.001749	7	ACCUGGGUUGUCCCCUCUAG	ACCUGGAUUGUCCCCUCUAG	hsa-miR-6742-3p,ACCUGG[G/A]UUGUCCCCUCUAG	1004	545	127	17.1687
219	hsa-miR-4666a-5p	chr1	+	hsa-mir-4666a	No	1	rs562096649	228462089	G > A	0.0002	7	AUACAUGUCAGAUUGUAUGCC	AUACAUAUCAGAUUGUAUGCC	hsa-miR-4666a-5p,AUACAU[G/A]UCAGAUUGUAUGCC	994	1745	337	25.5882
220	hsa-miR-4666a-3p	chr1	+	hsa-mir-4666a	No	1	rs530848309	228462130	A > G	0.000399	6	CAUACAAUCUGACAUGUAUUU	CAUACGAUCUGACAUGUAUUU	hsa-miR-4666a-3p,CAUAC[A/G]AUCUGACAUGUAUUU	1836	38	29	10.9792
221	hsa-miR-1182	chr1	-	hsa-mir-1182	No	1	rs758349029	231019861	C > G	8e-06	3	GAGGGUCUUGGGAGGGAUGUGAC	GACGGUCUUGGGAGGGAUGUGAC	hsa-miR-1182,GA[G/C]GGUCUUGGGAGGGAUGUGAC	228	28	0	0
222	hsa-miR-4427	chr1	+	hsa-mir-4427	No	0
223	hsa-miR-4671-5p	chr1	+	hsa-mir-4671	No	0
224	hsa-miR-4671-3p	chr1	+	hsa-mir-4671	No	0
225	hsa-miR-4753-5p	chr1	-	hsa-mir-4753	No	1	rs547986869	235190105	T > C	0.0002	3	CAAGGCCAAAGGAAGAGAACAG	CAGGGCCAAAGGAAGAGAACAG	hsa-miR-4753-5p,CA[A/G]GGCCAAAGGAAGAGAACAG	228	333	37	13.428
226	hsa-miR-4753-3p	chr1	-	hsa-mir-4753	No	0
227	hsa-miR-1537-3p	chr1	-	hsa-mir-1537	No	1	rs566982898	235853016	G > A	0.000126	6	AAAACCGUCUAGUUACAGUUGU	AAAACUGUCUAGUUACAGUUGU	hsa-miR-1537-3p,AAAAC[C/U]GUCUAGUUACAGUUGU	64	1324	22	7.55768
228	hsa-miR-1537-5p	chr1	-	hsa-mir-1537	No	1	rs753867118	235853054	C > G	9.3e-05	5	AGCUGUAAUUAGUCAGUUUUCU	AGCUCUAAUUAGUCAGUUUUCU	hsa-miR-1537-5p,AGCU[G/C]UAAUUAGUCAGUUUUCU	462	380	42	10.0239
229	hsa-miR-4428	chr1	+	hsa-mir-4428	No	0
230	hsa-miR-3123	chr1	+	hsa-mir-3123	No	0
231	hsa-miR-4677-5p	chr1	+	hsa-mir-4677	No	0
232	hsa-miR-4677-3p	chr1	+	hsa-mir-4677	No	0
233	hsa-miR-3916	chr1	-	hsa-mir-3916	No	1	rs534993102	247202035	T > C	0.002218	7	AAGAGGAAGAAAUGGCUGGUUCUCAG	AAGAGGGAGAAAUGGCUGGUUCUCAG	hsa-miR-3916,AAGAGG[A/G]AGAAAUGGCUGGUUCUCAG	1043	685	140	16.5631
234	hsa-miR-3124-5p	chr1	+	hsa-mir-3124	No	1	rs12081872	248826385	C > T	0.010628	3	UUCGCGGGCGAAGGCAAAGUC	UUUGCGGGCGAAGGCAAAGUC	hsa-miR-3124-5p,UU[C/U]GCGGGCGAAGGCAAAGUC	8	23	0	0
235	hsa-miR-3124-3p	chr1	+	hsa-mir-3124	No	0
236	hsa-miR-5699-3p	chr10	-	hsa-mir-5699	No	0
237	hsa-miR-5699-5p	chr10	-	hsa-mir-5699	No	0
238	hsa-miR-6072	chr10	-	hsa-mir-6072	No	0
239	hsa-miR-6078	chr10	+	hsa-mir-6078	No	0
240	hsa-miR-3155a	chr10	+	hsa-mir-3155a	No	0
241	hsa-miR-3155b	chr10	-	hsa-mir-3155b	No	0
242	hsa-miR-548ak	chr10	-	hsa-mir-548ak	No	0
243	hsa-miR-4480	chr10	+	hsa-mir-4480	No	0
244	hsa-miR-4481	chr10	-	hsa-mir-4481	No	0
245	hsa-miR-548q	chr10	-	hsa-mir-548q	No	1	rs772722225	12725342	C > G	0.000124	5	GCUGGUGCAAAAGUAAUGGCGG	GCUGCUGCAAAAGUAAUGGCGG	hsa-miR-548q,GCUG[G/C]UGCAAAAGUAAUGGCGG	414	950	90	14.3509
246	hsa-miR-4293	chr10	-	hsa-mir-4293	No	1	rs12220909	14383222	G > C	0.031393	5	CAGCCUGACAGGAACAG	CAGCGUGACAGGAACAG	hsa-miR-4293,CAGC[C/G]UGACAGGAACAG	450	32	1	0.833333
247	hsa-miR-1265	chr10	+	hsa-mir-1265	No	1	rs777480781	14436595	G > A	1.4e-05	7	CAGGAUGUGGUCAAGUGUUGUU	CAGGAUAUGGUCAAGUGUUGUU	hsa-miR-1265,CAGGAU[G/A]UGGUCAAGUGUUGUU	412	454	43	9.94242
248	hsa-miR-511-5p	chr10	+	hsa-mir-511	No	1	rs782165226	17845123	T > C	1.2e-05	2	GUGUCUUUUGCUCUGCAGUCA	GCGUCUUUUGCUCUGCAGUCA	hsa-miR-511-5p,G[U/C]GUCUUUUGCUCUGCAGUCA	1170	91	15	4.59703
249	hsa-miR-511-3p	chr10	+	hsa-mir-511	No	1	rs548691953	17845162	T > A	6.8e-05	3	AAUGUGUAGCAAAAGACAGA	AAAGUGUAGCAAAAGACAGA	hsa-miR-511-3p,AA[U/A]GUGUAGCAAAAGACAGA	820	640	115	15.8745
250	hsa-miR-4675	chr10	+	hsa-mir-4675	No	0
251	hsa-miR-1915-5p	chr10	-	hsa-mir-1915	No	0
252	hsa-miR-1915-3p	chr10	-	hsa-mir-1915	No	0
253	hsa-miR-1254	chr10	+	hsa-mir-1254-2	No	0
254	hsa-miR-603	chr10	+	hsa-mir-603	No	1	rs750318040	24275751	C > A	9e-06	7	CACACACUGCAAUUACUUUUGC	CACACAAUGCAAUUACUUUUGC	hsa-miR-603,CACACA[C/A]UGCAAUUACUUUUGC	1436	1399	400	28.2211
255	hsa-miR-8086	chr10	-	hsa-mir-8086	No	0
256	hsa-miR-604	chr10	-	hsa-mir-604	No	2	rs771176135	29545035	C > G	8e-06	3	AGGCUGCGGAAUUCAGGAC	AGCCUGCGGAAUUCAGGAC	hsa-miR-604,AG[G/C]CUGCGGAAUUCAGGAC	288	172	27	12.1312
256	hsa-miR-604	chr10	-	hsa-mir-604	No	2	rs186844507	29545030	C > T	0.019485	8	AGGCUGCGGAAUUCAGGAC	AGGCUGCAGAAUUCAGGAC	hsa-miR-604,AGGCUGC[G/A]GAAUUCAGGAC	288	533	181	46.1975
257	hsa-miR-938	chr10	-	hsa-mir-938	No	1	rs12416605	29602331	C > T	0.221762	2	UGCCCUUAAAGGUGAACCCAGU	UACCCUUAAAGGUGAACCCAGU	hsa-miR-938,U[G/A]CCCUUAAAGGUGAACCCAGU	289	264	19	6.87864
258	hsa-miR-7162-5p	chr10	-	hsa-mir-7162	No	1	rs769677685	30368658	A > G	1.1e-05	8	UGCUUCCUUUCUCAGCUG	UGCUUCCCUUCUCAGCUG	hsa-miR-7162-5p,UGCUUCC[U/C]UUCUCAGCUG	591	577	202	34.5915
259	hsa-miR-7162-3p	chr10	-	hsa-mir-7162	No	1	rs779741511	30368611	T > C	1.2e-05	5	UCUGAGGUGGAACAGCAGC	UCUGGGGUGGAACAGCAGC	hsa-miR-7162-3p,UCUG[A/G]GGUGGAACAGCAGC	792	907	148	17.4621
260	hsa-miR-3611	chr10	-	hsa-mir-3611	No	1	rs150577768	35079628	A > C	0.0002	2	UUGUGAAGAAAGAAAUUCUUA	UGGUGAAGAAAGAAAUUCUUA	hsa-miR-3611,U[U/G]GUGAAGAAAGAAAUUCUUA	763	462	81	13.6427
261	hsa-miR-4683	chr10	-	hsa-mir-4683	No	2	rs202052786	35641198	T > A	0.001	6	UGGAGAUCCAGUGCUCGCCCGAU	UGGAGUUCCAGUGCUCGCCCGAU	hsa-miR-4683,UGGAG[A/U]UCCAGUGCUCGCCCGAU	309	404	19	5.37754
261	hsa-miR-4683	chr10	-	hsa-mir-4683	No	2	rs151060225	35641196	G > T	7.2e-05	8	UGGAGAUCCAGUGCUCGCCCGAU	UGGAGAUACAGUGCUCGCCCGAU	hsa-miR-4683,UGGAGAU[C/A]CAGUGCUCGCCCGAU	309	383	116	33.7194
262	hsa-miR-5100	chr10	+	hsa-mir-5100	No	0
263	hsa-miR-3156-5p	chr10	+	hsa-mir-3156-1	No	0
264	hsa-miR-3156-3p	chr10	+	hsa-mir-3156-1	No	0
265	hsa-miR-4294	chr10	-	hsa-mir-4294	No	0
266	hsa-miR-605-5p	chr10	+	hsa-mir-605	No	1	rs113212828	51299589	A > G	0.000773	2	UAAAUCCCAUGGUGCCUUCUCCU	UGAAUCCCAUGGUGCCUUCUCCU	hsa-miR-605-5p,U[A/G]AAUCCCAUGGUGCCUUCUCCU	794	317	40	7.97297
267	hsa-miR-605-3p	chr10	+	hsa-mir-605	No	1	rs759219082	51299627	G > A	4.6e-05	5	AGAAGGCACUAUGAGAUUUAGA	AGAAAGCACUAUGAGAUUUAGA	hsa-miR-605-3p,AGAA[G/A]GCACUAUGAGAUUUAGA	674	976	104	12.8227
268	hsa-miR-548f-3p	chr10	-	hsa-mir-548f-1	No	0
269	hsa-miR-548f-5p	chr10	-	hsa-mir-548f-1	No	2	rs776324557	54607944	T > G	9e-06	4	UGCAAAAGUAAUCACAGUUUUU	UGCCAAAGUAAUCACAGUUUUU	hsa-miR-548f-5p,UGC[A/C]AAAGUAAUCACAGUUUUU	1405	635	204	21.5976
269	hsa-miR-548f-5p	chr10	-	hsa-mir-548f-1	No	2	rs762124281	54607945	G > T	9e-06	3	UGCAAAAGUAAUCACAGUUUUU	UGAAAAAGUAAUCACAGUUUUU	hsa-miR-548f-5p,UG[C/A]AAAAGUAAUCACAGUUUUU	1405	3030	765	37.0768
270	hsa-miR-3924	chr10	-	hsa-mir-3924	No	0
271	hsa-miR-1296-5p	chr10	-	hsa-mir-1296	No	0
272	hsa-miR-1296-3p	chr10	-	hsa-mir-1296	No	0
273	hsa-miR-7151-5p	chr10	-	hsa-mir-7151	No	0
274	hsa-miR-7151-3p	chr10	-	hsa-mir-7151	No	1	rs548181540	67403364	G > T	0.000799	8	CUACAGGCUGGAAUGGGCUCA	CUACAGGAUGGAAUGGGCUCA	hsa-miR-7151-3p,CUACAGG[C/A]UGGAAUGGGCUCA	776	644	245	34.6571
275	hsa-miR-1254	chr10	+	hsa-mir-1254-1	No	1	rs138812323	68759336	G > A	0.0002	2	AGCCUGGAAGCUGGAGCCUGCAGU	AACCUGGAAGCUGGAGCCUGCAGU	hsa-miR-1254,A[G/A]CCUGGAAGCUGGAGCCUGCAGU	740	382	57	10.7208
276	hsa-miR-7152-5p	chr10	+	hsa-mir-7152	No	0
277	hsa-miR-7152-3p	chr10	+	hsa-mir-7152	No	0
278	hsa-miR-4676-5p	chr10	+	hsa-mir-4676	No	1	rs183259402	72721042	C > T	0.000998	5	GAGCCAGUGGUGAGACAGUGA	GAGCUAGUGGUGAGACAGUGA	hsa-miR-4676-5p,GAGC[C/U]AGUGGUGAGACAGUGA	513	237	19	5.44905
279	hsa-miR-4676-3p	chr10	+	hsa-mir-4676	No	0
280	hsa-miR-606	chr10	+	hsa-mir-606	No	1	rs770869203	75552522	T > C	2.6e-05	5	AAACUACUGAAAAUCAAAGAU	AAACCACUGAAAAUCAAAGAU	hsa-miR-606,AAAC[U/C]ACUGAAAAUCAAAGAU	567	494	76	14.3601
281	hsa-miR-346	chr10	-	hsa-mir-346	No	0
282	hsa-miR-4678	chr10	+	hsa-mir-4678	No	0
283	hsa-miR-4679	chr10	-	hsa-mir-4679-2	No	0
284	hsa-miR-4679	chr10	+	hsa-mir-4679-1	No	1	rs375215233	89063350	A > T	0.000399	7	UCUGUGAUAGAGAUUCUUUGCU	UCUGUGUUAGAGAUUCUUUGCU	hsa-miR-4679,UCUGUG[A/U]UAGAGAUUCUUUGCU	641	783	100	14.1153
285	hsa-miR-107	chr10	-	hsa-mir-107	No	0
286	hsa-miR-3157-5p	chr10	-	hsa-mir-3157	No	1	rs141770574	96064388	G > A	0.000599	3	UUCAGCCAGGCUAGUGCAGUCU	UUUAGCCAGGCUAGUGCAGUCU	hsa-miR-3157-5p,UU[C/U]AGCCAGGCUAGUGCAGUCU	520	336	30	7.17712
287	hsa-miR-3157-3p	chr10	-	hsa-mir-3157	No	0
288	hsa-miR-607	chr10	-	hsa-mir-607	No	2	rs764451551	96828703	A > G	1e-05	2	GUUCAAAUCCAGAUCUAUAAC	GCUCAAAUCCAGAUCUAUAAC	hsa-miR-607,G[U/C]UCAAAUCCAGAUCUAUAAC	2654	1276	598	32.4957
288	hsa-miR-607	chr10	-	hsa-mir-607	No	2	rs755655286	96828700	T > G	0.000328	5	GUUCAAAUCCAGAUCUAUAAC	GUUCCAAUCCAGAUCUAUAAC	hsa-miR-607,GUUC[A/C]AAUCCAGAUCUAUAAC	2654	1352	658	34.7366
289	hsa-miR-1287-5p	chr10	-	hsa-mir-1287	No	2	rs764565318	98395288	C > A	1.6e-05	5	UGCUGGAUCAGUGGUUCGAGUC	UGCUUGAUCAGUGGUUCGAGUC	hsa-miR-1287-5p,UGCU[G/U]GAUCAGUGGUUCGAGUC	426	337	25	6.59812
289	hsa-miR-1287-5p	chr10	-	hsa-mir-1287	No	2	rs747124418	98395291	C > G	8e-06	2	UGCUGGAUCAGUGGUUCGAGUC	UCCUGGAUCAGUGGUUCGAGUC	hsa-miR-1287-5p,U[G/C]CUGGAUCAGUGGUUCGAGUC	426	545	62	12.8673
290	hsa-miR-1287-3p	chr10	-	hsa-mir-1287	No	0
291	hsa-miR-4685-5p	chr10	-	hsa-mir-4685	No	1	rs554637686	98431352	C > T	0.000147	6	CCCAGGGCUUGGAGUGGGGCAAGGUU	CCCAGAGCUUGGAGUGGGGCAAGGUU	hsa-miR-4685-5p,CCCAG[G/A]GCUUGGAGUGGGGCAAGGUU	1022	757	186	21.1466
292	hsa-miR-4685-3p	chr10	-	hsa-mir-4685	No	0
293	hsa-miR-6507-5p	chr10	-	hsa-mir-6507	No	0
294	hsa-miR-6507-3p	chr10	-	hsa-mir-6507	No	0
295	hsa-miR-608	chr10	+	hsa-mir-608	No	1	rs749799472	100975006	G > A	9e-06	7	AGGGGUGGUGUUGGGACAGCUCCGU	AGGGGUAGUGUUGGGACAGCUCCGU	hsa-miR-608,AGGGGU[G/A]GUGUUGGGACAGCUCCGU	850	249	44	9.56409
296	hsa-miR-3158-3p	chr10	+	hsa-mir-3158-1	No	1	rs548867129	101601469	G > C	4.4e-05	4	AAGGGCUUCCUCUCUGCAGGAC	AAGCGCUUCCUCUCUGCAGGAC	hsa-miR-3158-3p,AAG[G/C]GCUUCCUCUCUGCAGGAC	443	40	2	1.50244
297	hsa-miR-3158-5p	chr10	+	hsa-mir-3158-1	No	0
298	hsa-miR-3158-3p	chr10	-	hsa-mir-3158-2	No	1	rs780888219	101601446	C > T	1.1e-05	3	AAGGGCUUCCUCUCUGCAGGAC	AAAGGCUUCCUCUCUGCAGGAC	hsa-miR-3158-3p,AA[G/A]GGCUUCCUCUCUGCAGGAC	443	717	59	10.4686
299	hsa-miR-3158-5p	chr10	-	hsa-mir-3158-2	No	0
300	hsa-miR-146b-5p	chr10	+	hsa-mir-146b	No	1	rs762226942	102436522	A > G	2.7e-05	3	UGAGAACUGAAUUCCAUAGGCU	UGGGAACUGAAUUCCAUAGGCU	hsa-miR-146b-5p,UG[A/G]GAACUGAAUUCCAUAGGCU	504	340	32	7.73028
301	hsa-miR-146b-3p	chr10	+	hsa-mir-146b	No	0
302	hsa-miR-1307-3p	chr10	-	hsa-mir-1307	No	1	rs781103034	103394321	G > A	1.7e-05	2	ACUCGGCGUGGCGUCGGUCGUG	AUUCGGCGUGGCGUCGGUCGUG	hsa-miR-1307-3p,A[C/U]UCGGCGUGGCGUCGGUCGUG	18	7	1	8.90871
303	hsa-miR-1307-5p	chr10	-	hsa-mir-1307	No	3	rs751122680	103394356	G > A	1.7e-05	6	UCGACCGGACCUCGACCGGCU	UCGACUGGACCUCGACCGGCU	hsa-miR-1307-5p,UCGAC[C/U]GGACCUCGACCGGCU	2	16	0	0
303	hsa-miR-1307-5p	chr10	-	hsa-mir-1307	No	3	rs763490878	103394355	C > T	3.3e-05	7	UCGACCGGACCUCGACCGGCU	UCGACCAGACCUCGACCGGCU	hsa-miR-1307-5p,UCGACC[G/A]GACCUCGACCGGCU	2	15	0	0
303	hsa-miR-1307-5p	chr10	-	hsa-mir-1307	No	3	rs750389441	103394360	G > C	1.7e-05	2	UCGACCGGACCUCGACCGGCU	UGGACCGGACCUCGACCGGCU	hsa-miR-1307-5p,U[C/G]GACCGGACCUCGACCGGCU	2	21	0	0
304	hsa-miR-936	chr10	-	hsa-mir-936	No	2	rs761029315	104048169	C > T	1.6e-05	4	ACAGUAGAGGGAGGAAUCGCAG	ACAAUAGAGGGAGGAAUCGCAG	hsa-miR-936,ACA[G/A]UAGAGGGAGGAAUCGCAG	476	485	51	10.6144
304	hsa-miR-936	chr10	-	hsa-mir-936	No	2	rs79924817	104048170	T > C	0.002328	3	ACAGUAGAGGGAGGAAUCGCAG	ACGGUAGAGGGAGGAAUCGCAG	hsa-miR-936,AC[A/G]GUAGAGGGAGGAAUCGCAG	476	30	1	0.836827
305	hsa-miR-609	chr10	-	hsa-mir-609	No	2	rs762207899	104218863	C > T	1.8e-05	6	AGGGUGUUUCUCUCAUCUCU	AGGGUAUUUCUCUCAUCUCU	hsa-miR-609,AGGGU[G/A]UUUCUCUCAUCUCU	314	275	21	7.14641
305	hsa-miR-609	chr10	-	hsa-mir-609	No	2	rs767903536	104218864	A > C	0.000142	5	AGGGUGUUUCUCUCAUCUCU	AGGGGGUUUCUCUCAUCUCU	hsa-miR-609,AGGG[U/G]GUUUCUCUCAUCUCU	314	433	31	8.40723
306	hsa-miR-4482-5p	chr10	-	hsa-mir-4482	No	1	rs45596840	104268396	G > A	0.177902	3	AACCCAGUGGGCUAUGGAAAUG	AAUCCAGUGGGCUAUGGAAAUG	hsa-miR-4482-5p,AA[C/U]CCAGUGGGCUAUGGAAAUG	453	429	35	7.93945
307	hsa-miR-4482-3p	chr10	-	hsa-mir-4482	No	0
308	hsa-miR-4680-5p	chr10	+	hsa-mir-4680	No	2	rs749729920	110898101	T > C	8e-06	8	AGAACUCUUGCAGUCUUAGAUGU	AGAACUCCUGCAGUCUUAGAUGU	hsa-miR-4680-5p,AGAACUC[U/C]UGCAGUCUUAGAUGU	417	592	148	29.7874
308	hsa-miR-4680-5p	chr10	+	hsa-mir-4680	No	2	rs780271274	110898098	C > G	8e-06	5	AGAACUCUUGCAGUCUUAGAUGU	AGAAGUCUUGCAGUCUUAGAUGU	hsa-miR-4680-5p,AGAA[C/G]UCUUGCAGUCUUAGAUGU	417	514	38	8.20794
309	hsa-miR-4680-3p	chr10	+	hsa-mir-4680	No	0
310	hsa-miR-548e-3p	chr10	+	hsa-mir-548e	No	1	rs757675346	110988982	A > G	1e-05	5	AAAAACUGAGACUACUUUUGCA	AAAAGCUGAGACUACUUUUGCA	hsa-miR-548e-3p,AAAA[A/G]CUGAGACUACUUUUGCA	2137	1097	474	30.958
311	hsa-miR-548e-5p	chr10	+	hsa-mir-548e	No	0
312	hsa-miR-6715a-3p	chr10	+	hsa-mir-6715a	No	1	rs753368507	112299662	A > G	1.8e-05	3	CCAAACCAGUCGUGCCUGUGG	CCGAACCAGUCGUGCCUGUGG	hsa-miR-6715a-3p,CC[A/G]AACCAGUCGUGCCUGUGG	839	23	2	1.43974
313	hsa-miR-6715b-5p	chr10	-	hsa-mir-6715b	No	0
314	hsa-miR-6715b-3p	chr10	-	hsa-mir-6715b	No	1	rs761643095	112299637	G > A	3.4e-05	7	CUCAAACCGGCUGUGCCUGUGG	CUCAAAUCGGCUGUGCCUGUGG	hsa-miR-6715b-3p,CUCAAA[C/U]CGGCUGUGCCUGUGG	825	1489	285	25.7141
315	hsa-miR-4295	chr10	+	hsa-mir-4295	No	0
316	hsa-miR-4483	chr10	-	hsa-mir-4483	No	0
317	hsa-miR-2110	chr10	-	hsa-mir-2110	No	1	rs745914474	114174166	T > C	0.000349	7	UUGGGGAAACGGCCGCUGAGUG	UUGGGGGAACGGCCGCUGAGUG	hsa-miR-2110,UUGGGG[A/G]AACGGCCGCUGAGUG	938	935	204	21.7833
318	hsa-miR-3663-5p	chr10	-	hsa-mir-3663	No	0
319	hsa-miR-3663-3p	chr10	-	hsa-mir-3663	No	0
320	hsa-miR-4681	chr10	+	hsa-mir-4681	No	0
321	hsa-miR-4682	chr10	+	hsa-mir-4682	No	1	rs573264996	119958528	T > A	0.0002	7	UCUGAGUUCCUGGAGCCUGGUCU	UCUGAGAUCCUGGAGCCUGGUCU	hsa-miR-4682,UCUGAG[U/A]UCCUGGAGCCUGGUCU	636	720	106	15.6643
322	hsa-miR-3941	chr10	+	hsa-mir-3941	No	0
323	hsa-miR-4296	chr10	-	hsa-mir-4296	No	1	rs182347826	125032854	C > A	0.000599	7	AUGUGGGCUCAGGCUCA	AUGUGGUCUCAGGCUCA	hsa-miR-4296,AUGUGG[G/U]CUCAGGCUCA	442	409	42	9.87817
324	hsa-miR-4484	chr10	+	hsa-mir-4484	No	1	rs146182954	125819810	G > A	0.000799	8	AAAAGGCGGGAGAAGCCCCA	AAAAGGCAGGAGAAGCCCCA	hsa-miR-4484,AAAAGGC[G/A]GGAGAAGCCCCA	365	1115	312	48.907
325	hsa-miR-4297	chr10	-	hsa-mir-4297	No	0
326	hsa-miR-378c	chr10	-	hsa-mir-378c	No	0
327	hsa-miR-202-5p	chr10	-	hsa-mir-202	No	1	rs777804748	133247589	A > G	4.9e-05	5	UUCCUAUGCAUAUACUUCUUUG	UUCCCAUGCAUAUACUUCUUUG	hsa-miR-202-5p,UUCC[U/C]AUGCAUAUACUUCUUUG	517	640	69	11.9954
328	hsa-miR-202-3p	chr10	-	hsa-mir-202	No	1	rs764929236	133247550	A > C	4.9e-05	8	AGAGGUAUAGGGCAUGGGAA	AGAGGUAGAGGGCAUGGGAA	hsa-miR-202-3p,AGAGGUA[U/G]AGGGCAUGGGAA	371	385	128	33.8682
329	hsa-miR-3944-3p	chr10	-	hsa-mir-3944	No	0
330	hsa-miR-3944-5p	chr10	-	hsa-mir-3944	No	0
331	hsa-miR-6743-5p	chr11	+	hsa-mir-6743	No	0
332	hsa-miR-6743-3p	chr11	+	hsa-mir-6743	No	2	rs377487596	209390	C > T	0.001998	8	AGCCGCUCUUCUCCCUGCCCACA	AGCCGCUUUUCUCCCUGCCCACA	hsa-miR-6743-3p,AGCCGCU[C/U]UUCUCCCUGCCCACA	34	35	7	20.292
332	hsa-miR-6743-3p	chr11	+	hsa-mir-6743	No	2	rs370694209	209387	G > A	2.5e-05	5	AGCCGCUCUUCUCCCUGCCCACA	AGCCACUCUUCUCCCUGCCCACA	hsa-miR-6743-3p,AGCC[G/A]CUCUUCUCCCUGCCCACA	34	417	2	1.67966
333	hsa-miR-210-3p	chr11	-	hsa-mir-210	No	1	rs759616365	568131	C > T	6.4e-05	3	CUGUGCGUGUGACAGCGGCUGA	CUAUGCGUGUGACAGCGGCUGA	hsa-miR-210-3p,CU[G/A]UGCGUGUGACAGCGGCUGA	60	26	0	0
334	hsa-miR-210-5p	chr11	-	hsa-mir-210	No	0
335	hsa-miR-6744-5p	chr11	+	hsa-mir-6744	No	0
336	hsa-miR-6744-3p	chr11	+	hsa-mir-6744	No	0
337	hsa-miR-4298	chr11	-	hsa-mir-4298	No	0
338	hsa-miR-7847-3p	chr11	+	hsa-mir-7847	No	1	rs148042410	1880106	G > A	8.8e-05	2	CGUGGAGGACGAGGAGGAGGC	CAUGGAGGACGAGGAGGAGGC	hsa-miR-7847-3p,C[G/A]UGGAGGACGAGGAGGAGGC	501	407	47	10.4083
339	hsa-miR-675-5p	chr11	-	hsa-mir-675	Yes (64891158-64902450:4:hetero:hsa-mir-192/hsa-mir-194-2/hsa-mir-6750/hsa-mir-6749)	2	rs776309978	1996816	C > T	5.4e-05	7	UGGUGCGGAGAGGGCCCACAGUG	UGGUGCAGAGAGGGCCCACAGUG	hsa-miR-675-5p,UGGUGC[G/A]GAGAGGGCCCACAGUG	21	324	3	3.63696
339	hsa-miR-675-5p	chr11	-	hsa-mir-675	Yes (64891158-64902450:4:hetero:hsa-mir-192/hsa-mir-194-2/hsa-mir-6750/hsa-mir-6749)	2	rs759134214	1996817	G > A	5.5e-05	6	UGGUGCGGAGAGGGCCCACAGUG	UGGUGUGGAGAGGGCCCACAGUG	hsa-miR-675-5p,UGGUG[C/U]GGAGAGGGCCCACAGUG	21	478	2	1.99621
340	hsa-miR-675-3p	chr11	-	hsa-mir-675	Yes (64891158-64902450:4:hetero:hsa-mir-192/hsa-mir-194-2/hsa-mir-6750/hsa-mir-6749)	1	rs771966122	1996786	A > G	9e-06	2	CUGUAUGCCCUCACCGCUCA	CCGUAUGCCCUCACCGCUCA	hsa-miR-675-3p,C[U/C]GUAUGCCCUCACCGCUCA	394	28	1	0.952079
341	hsa-miR-483-5p	chr11	-	hsa-mir-483	No	1	rs768219457	2134197	C > T	6.6e-05	6	AAGACGGGAGGAAAGAAGGGAG	AAGACAGGAGGAAAGAAGGGAG	hsa-miR-483-5p,AAGAC[G/A]GGAGGAAAGAAGGGAG	41	719	7	4.07701
342	hsa-miR-483-3p	chr11	-	hsa-mir-483	No	0
343	hsa-miR-4686	chr11	+	hsa-mir-4686	No	0
344	hsa-miR-4687-5p	chr11	+	hsa-mir-4687	No	1	rs201287316	3856078	C > G	0.001121	6	CAGCCCUCCUCCCGCACCCAAA	CAGCCGUCCUCCCGCACCCAAA	hsa-miR-4687-5p,CAGCC[C/G]UCCUCCCGCACCCAAA	339	18	0	0
345	hsa-miR-4687-3p	chr11	+	hsa-mir-4687	No	0
346	hsa-miR-302e	chr11	+	hsa-mir-302e	No	0
347	hsa-miR-5691	chr11	-	hsa-mir-5691	No	0
348	hsa-miR-4485-3p	chr11	-	hsa-mir-4485	No	0
349	hsa-miR-4485-5p	chr11	-	hsa-mir-4485	No	0
350	hsa-miR-4299	chr11	-	hsa-mir-4299	No	0
351	hsa-miR-8070	chr11	-	hsa-mir-8070	No	1	rs138552125	11783210	C > T	0.009062	3	AUGUGAUUGACGGCUGACUCCA	AUAUGAUUGACGGCUGACUCCA	hsa-miR-8070,AU[G/A]UGAUUGACGGCUGACUCCA	710	785	131	17.5472
352	hsa-miR-6124	chr11	+	hsa-mir-6124	No	0
353	hsa-miR-6073	chr11	-	hsa-mir-6073	No	0
354	hsa-miR-3159	chr11	+	hsa-mir-3159	No	0
355	hsa-miR-4486	chr11	+	hsa-mir-4486	No	0
356	hsa-miR-4694-5p	chr11	-	hsa-mir-4694	No	0
357	hsa-miR-4694-3p	chr11	-	hsa-mir-4694	No	0
358	hsa-miR-8054	chr11	-	hsa-mir-8054	No	0
359	hsa-miR-8087	chr11	-	hsa-mir-8087	No	0
360	hsa-miR-610	chr11	+	hsa-mir-610	No	0
361	hsa-miR-8068	chr11	-	hsa-mir-8068	No	0
362	hsa-miR-1343-3p	chr11	+	hsa-mir-1343	No	0
363	hsa-miR-1343-5p	chr11	+	hsa-mir-1343	No	0
364	hsa-miR-3973	chr11	+	hsa-mir-3973	No	0
365	hsa-miR-670-5p	chr11	+	hsa-mir-670	No	2	rs368534588	43559680	T > C	0.000139	6	GUCCCUGAGUGUAUGUGGUG	GUCCCCGAGUGUAUGUGGUG	hsa-miR-670-5p,GUCCC[U/C]GAGUGUAUGUGGUG	782	59	10	4.65555
365	hsa-miR-670-5p	chr11	+	hsa-mir-670	No	2	rs747480393	43559681	G > C	0.000138	7	GUCCCUGAGUGUAUGUGGUG	GUCCCUCAGUGUAUGUGGUG	hsa-miR-670-5p,GUCCCU[G/C]AGUGUAUGUGGUG	782	644	104	14.655
366	hsa-miR-670-3p	chr11	+	hsa-mir-670	No	0
367	hsa-miR-129-5p	chr11	+	hsa-mir-129-2	No	0
368	hsa-miR-129-2-3p	chr11	+	hsa-mir-129-2	No	1	rs755567849	43581453	C > A	0.000317	4	AAGCCCUUACCCCAAAAAGCAU	AAGACCUUACCCCAAAAAGCAU	hsa-miR-129-2-3p,AAG[C/A]CCUUACCCCAAAAAGCAU	407	309	36	10.1514
369	hsa-miR-7154-5p	chr11	-	hsa-mir-7154	No	0
370	hsa-miR-7154-3p	chr11	-	hsa-mir-7154	No	0
371	hsa-miR-4688	chr11	+	hsa-mir-4688	No	0
372	hsa-miR-3160-3p	chr11	-	hsa-mir-3160-1	No	0
373	hsa-miR-3160-5p	chr11	-	hsa-mir-3160-1	No	0
374	hsa-miR-3160-3p	chr11	+	hsa-mir-3160-2	No	0
375	hsa-miR-3160-5p	chr11	+	hsa-mir-3160-2	No	0
376	hsa-miR-5582-5p	chr11	-	hsa-mir-5582	No	2	rs532729696	46753190	C > T	0.000141	3	UAGGCACACUUAAAGUUAUAGC	UAAGCACACUUAAAGUUAUAGC	hsa-miR-5582-5p,UA[G/A]GCACACUUAAAGUUAUAGC	618	798	100	14.2398
376	hsa-miR-5582-5p	chr11	-	hsa-mir-5582	No	2	rs779737708	46753185	T > C	7.6e-05	8	UAGGCACACUUAAAGUUAUAGC	UAGGCACGCUUAAAGUUAUAGC	hsa-miR-5582-5p,UAGGCAC[A/G]CUUAAAGUUAUAGC	618	227	153	40.8493
377	hsa-miR-5582-3p	chr11	-	hsa-mir-5582	No	0
378	hsa-miR-6745	chr11	-	hsa-mir-6745	No	3	rs753674086	47179634	C > A	1e-05	2	UGGGUGGAAGAAGGUCUGGUU	UUGGUGGAAGAAGGUCUGGUU	hsa-miR-6745,U[G/U]GGUGGAAGAAGGUCUGGUU	749	518	108	17.3388
378	hsa-miR-6745	chr11	-	hsa-mir-6745	No	3	rs763854612	47179631	A > C	0.000289	5	UGGGUGGAAGAAGGUCUGGUU	UGGGGGGAAGAAGGUCUGGUU	hsa-miR-6745,UGGG[U/G]GGAAGAAGGUCUGGUU	749	645	132	18.9912
378	hsa-miR-6745	chr11	-	hsa-mir-6745	No	3	rs760629400	47179629	C > G	9e-06	7	UGGGUGGAAGAAGGUCUGGUU	UGGGUGCAAGAAGGUCUGGUU	hsa-miR-6745,UGGGUG[G/C]AAGAAGGUCUGGUU	749	244	46	10.7602
379	hsa-miR-4487	chr11	+	hsa-mir-4487	No	0
380	hsa-miR-3161	chr11	+	hsa-mir-3161	No	0
381	hsa-miR-6128	chr11	+	hsa-mir-6128	No	1	rs556012686	56743944	C > T	4e-05	2	ACUGGAAUUGGAGUCAAAA	AUUGGAAUUGGAGUCAAAA	hsa-miR-6128,A[C/U]UGGAAUUGGAGUCAAAA	906	1108	186	18.5643
382	hsa-miR-130a-5p	chr11	+	hsa-mir-130a	No	3	rs779670380	57641222	C > T	2e-05	5	UUCACAUUGUGCUACUGUCUGC	UUCAUAUUGUGCUACUGUCUGC	hsa-miR-130a-5p,UUCA[C/U]AUUGUGCUACUGUCUGC	1509	1226	367	26.9821
382	hsa-miR-130a-5p	chr11	+	hsa-mir-130a	No	3	rs746985078	57641223	A > G	2e-05	6	UUCACAUUGUGCUACUGUCUGC	UUCACGUUGUGCUACUGUCUGC	hsa-miR-130a-5p,UUCAC[A/G]UUGUGCUACUGUCUGC	1509	128	35	7.96377
382	hsa-miR-130a-5p	chr11	+	hsa-mir-130a	No	3	rs758215186	57641219	T > G	8e-06	2	UUCACAUUGUGCUACUGUCUGC	UGCACAUUGUGCUACUGUCUGC	hsa-miR-130a-5p,U[U/G]CACAUUGUGCUACUGUCUGC	1509	771	205	19.0056
383	hsa-miR-130a-3p	chr11	+	hsa-mir-130a	No	0
384	hsa-miR-3162-5p	chr11	-	hsa-mir-3162	No	0
385	hsa-miR-3162-3p	chr11	-	hsa-mir-3162	No	1	rs529173844	59595103	A > T	0.001198	5	UCCCUACCCCUCCACUCCCCA	UCCCAACCCCUCCACUCCCCA	hsa-miR-3162-3p,UCCC[U/A]ACCCCUCCACUCCCCA	246	457	12	3.57895
386	hsa-miR-6503-5p	chr11	-	hsa-mir-6503	No	0
387	hsa-miR-6503-3p	chr11	-	hsa-mir-6503	No	1	rs576426751	60209102	C > T	0.0002	3	GGGACUAGGAUGCAGACCUCC	GGAACUAGGAUGCAGACCUCC	hsa-miR-6503-3p,GG[G/A]ACUAGGAUGCAGACCUCC	182	369	13	5.01643
388	hsa-miR-4488	chr11	+	hsa-mir-4488	No	0
389	hsa-miR-611	chr11	-	hsa-mir-611	No	2	rs554037437	61792519	T > C	2.4e-05	4	GCGAGGACCCCUCGGGGUCUGAC	GCGGGGACCCCUCGGGGUCUGAC	hsa-miR-611,GCG[A/G]GGACCCCUCGGGGUCUGAC	52	81	1	1.54083
389	hsa-miR-611	chr11	-	hsa-mir-611	No	2	rs763940890	61792515	G > A	3.3e-05	8	GCGAGGACCCCUCGGGGUCUGAC	GCGAGGAUCCCUCGGGGUCUGAC	hsa-miR-611,GCGAGGA[C/U]CCCUCGGGGUCUGAC	52	23	3	8.67472
390	hsa-miR-1908-5p	chr11	-	hsa-mir-1908	No	0
391	hsa-miR-1908-3p	chr11	-	hsa-mir-1908	No	1	rs533201588	61815187	G > C	0.0002	6	CCGGCCGCCGGCUCCGCCCCG	CCGGCGGCCGGCUCCGCCCCG	hsa-miR-1908-3p,CCGGC[C/G]GCCGGCUCCGCCCCG	17	38	0	0
392	hsa-miR-6746-5p	chr11	-	hsa-mir-6746	No	0
393	hsa-miR-6746-3p	chr11	-	hsa-mir-6746	No	2	rs763757689	61878233	G > A	3.3e-05	5	CAGCCGCCGCCUGUCUCCACAG	CAGCUGCCGCCUGUCUCCACAG	hsa-miR-6746-3p,CAGC[C/U]GCCGCCUGUCUCCACAG	24	509	3	2.71429
393	hsa-miR-6746-3p	chr11	-	hsa-mir-6746	No	2	rs183699473	61878230	G > A	4e-05	8	CAGCCGCCGCCUGUCUCCACAG	CAGCCGCUGCCUGUCUCCACAG	hsa-miR-6746-3p,CAGCCGC[C/U]GCCUGUCUCCACAG	24	31	3	10.9985
394	hsa-miR-6747-5p	chr11	-	hsa-mir-6747	No	0
395	hsa-miR-6747-3p	chr11	-	hsa-mir-6747	No	1	rs763026799	62567026	G > C	2.5e-05	6	UCCUGCCUUCCUCUGCACCAG	UCCUGGCUUCCUCUGCACCAG	hsa-miR-6747-3p,UCCUG[C/G]CUUCCUCUGCACCAG	836	816	177	21.4301
396	hsa-miR-6748-5p	chr11	+	hsa-mir-6748	No	1	rs576628297	62789825	G > A	8.6e-05	6	UGUGGGUGGGAAGGACUGGAUU	UGUGGAUGGGAAGGACUGGAUU	hsa-miR-6748-5p,UGUGG[G/A]UGGGAAGGACUGGAUU	402	324	28	7.75841
397	hsa-miR-6748-3p	chr11	+	hsa-mir-6748	No	2	rs766465616	62789871	C > T	9e-06	7	UCCUGUCCCUGUCUCCUACAG	UCCUGUUCCUGUCUCCUACAG	hsa-miR-6748-3p,UCCUGU[C/U]CCUGUCUCCUACAG	468	490	58	12.1118
397	hsa-miR-6748-3p	chr11	+	hsa-mir-6748	No	2	rs760561540	62789867	C > T	9e-06	3	UCCUGUCCCUGUCUCCUACAG	UCUUGUCCCUGUCUCCUACAG	hsa-miR-6748-3p,UC[C/U]UGUCCCUGUCUCCUACAG	468	423	39	8.7654
398	hsa-miR-6514-5p	chr11	-	hsa-mir-6514	No	1	rs750228447	62792764	A > T	9e-06	8	UAUGGAGUGGACUUUCAGCUGGC	UAUGGAGAGGACUUUCAGCUGGC	hsa-miR-6514-5p,UAUGGAG[U/A]GGACUUUCAGCUGGC	414	571	181	37.2272
399	hsa-miR-6514-3p	chr11	-	hsa-mir-6514	No	1	rs370306415	62792719	G > C	7.7e-05	4	CUGCCUGUUCUUCCACUCCAG	CUGGCUGUUCUUCCACUCCAG	hsa-miR-6514-3p,CUG[C/G]CUGUUCUUCCACUCCAG	551	617	78	13.3775
400	hsa-miR-7155-5p	chr11	-	hsa-mir-7155	No	3	rs753340392	64341897	A > T	2.2e-05	8	UCUGGGGUCUUGGGCCAUC	UCUGGGGACUUGGGCCAUC	hsa-miR-7155-5p,UCUGGGG[U/A]CUUGGGCCAUC	907	1013	548	57.1705
400	hsa-miR-7155-5p	chr11	-	hsa-mir-7155	No	3	rs778974800	64341900	C > T	2e-05	5	UCUGGGGUCUUGGGCCAUC	UCUGAGGUCUUGGGCCAUC	hsa-miR-7155-5p,UCUG[G/A]GGUCUUGGGCCAUC	907	792	148	17.4621
400	hsa-miR-7155-5p	chr11	-	hsa-mir-7155	No	3	rs754884236	64341898	C > T	8.5e-05	7	UCUGGGGUCUUGGGCCAUC	UCUGGGAUCUUGGGCCAUC	hsa-miR-7155-5p,UCUGGG[G/A]UCUUGGGCCAUC	907	903	186	20.5525
401	hsa-miR-7155-3p	chr11	-	hsa-mir-7155	No	0
402	hsa-miR-1237-3p	chr11	+	hsa-mir-1237	No	2	rs756503898	64368690	G > T	8e-06	8	UCCUUCUGCUCCGUCCCCCAG	UCCUUCUUCUCCGUCCCCCAG	hsa-miR-1237-3p,UCCUUCU[G/U]CUCCGUCCCCCAG	815	839	371	44.8657
402	hsa-miR-1237-3p	chr11	+	hsa-mir-1237	No	2	rs572202156	64368688	C > A	5.8e-05	6	UCCUUCUGCUCCGUCCCCCAG	UCCUUAUGCUCCGUCCCCCAG	hsa-miR-1237-3p,UCCUU[C/A]UGCUCCGUCCCCCAG	815	364	45	8.26196
403	hsa-miR-1237-5p	chr11	+	hsa-mir-1237	No	3	rs113909793	64368658	G > A	3.1e-05	8	CGGGGGCGGGGCCGAAGCGCG	CGGGGGCAGGGCCGAAGCGCG	hsa-miR-1237-5p,CGGGGGC[G/A]GGGCCGAAGCGCG	383	583	270	57.1387
403	hsa-miR-1237-5p	chr11	+	hsa-mir-1237	No	3	rs374231034	64368654	G > A	9e-05	4	CGGGGGCGGGGCCGAAGCGCG	CGGAGGCGGGGCCGAAGCGCG	hsa-miR-1237-5p,CGG[G/A]GGCGGGGCCGAAGCGCG	383	386	58	15.0846
403	hsa-miR-1237-5p	chr11	+	hsa-mir-1237	No	3	rs371100689	64368652	G > A	5.9e-05	2	CGGGGGCGGGGCCGAAGCGCG	CAGGGGCGGGGCCGAAGCGCG	hsa-miR-1237-5p,C[G/A]GGGGCGGGGCCGAAGCGCG	383	220	48	16.536
404	hsa-miR-192-5p	chr11	-	hsa-mir-192	Yes (64891158-64902450:4:hetero:hsa-mir-192/hsa-mir-194-2/hsa-mir-6750/hsa-mir-6749)	1	rs750158178	64891220	T > A	0.000107	4	CUGACCUAUGAAUUGACAGCC	CUGUCCUAUGAAUUGACAGCC	hsa-miR-192-5p,CUG[A/U]CCUAUGAAUUGACAGCC	289	436	26	7.32455
405	hsa-miR-192-3p	chr11	-	hsa-mir-192	Yes (64891158-64902450:4:hetero:hsa-mir-192/hsa-mir-194-2/hsa-mir-6750/hsa-mir-6749)	1	rs753214315	64891178	C > T	5.7e-05	3	CUGCCAAUUCCAUAGGUCACAG	CUACCAAUUCCAUAGGUCACAG	hsa-miR-192-3p,CU[G/A]CCAAUUCCAUAGGUCACAG	555	611	84	14.4249
406	hsa-miR-194-5p	chr11	-	hsa-mir-194-2	Yes (64891158-64902450:4:hetero:hsa-mir-192/hsa-mir-194-2/hsa-mir-6750/hsa-mir-6749)	0
407	hsa-miR-194-3p	chr11	-	hsa-mir-194-2	Yes (64891158-64902450:4:hetero:hsa-mir-192/hsa-mir-194-2/hsa-mir-6750/hsa-mir-6749)	1	rs777631483	64891382	C > T	1.6e-05	8	CCAGUGGGGCUGCUGUUAUCUG	CCAGUGGAGCUGCUGUUAUCUG	hsa-miR-194-3p,CCAGUGG[G/A]GCUGCUGUUAUCUG	601	592	274	45.9359
408	hsa-miR-6750-5p	chr11	-	hsa-mir-6750	Yes (64891158-64902450:4:hetero:hsa-mir-192/hsa-mir-194-2/hsa-mir-6750/hsa-mir-6749)	0
409	hsa-miR-6750-3p	chr11	-	hsa-mir-6750	Yes (64891158-64902450:4:hetero:hsa-mir-192/hsa-mir-194-2/hsa-mir-6750/hsa-mir-6749)	0
410	hsa-miR-6749-5p	chr11	-	hsa-mir-6749	Yes (64891158-64902450:4:hetero:hsa-mir-192/hsa-mir-194-2/hsa-mir-6750/hsa-mir-6749)	2	rs769801960	64902448	C > T	9.7e-05	3	UCGGGCCUGGGGUUGGGGGAGC	UCAGGCCUGGGGUUGGGGGAGC	hsa-miR-6749-5p,UC[G/A]GGCCUGGGGUUGGGGGAGC	46	610	11	6.56673
410	hsa-miR-6749-5p	chr11	-	hsa-mir-6749	Yes (64891158-64902450:4:hetero:hsa-mir-192/hsa-mir-194-2/hsa-mir-6750/hsa-mir-6749)	2	rs775452953	64902449	G > A	0.000199	2	UCGGGCCUGGGGUUGGGGGAGC	UUGGGCCUGGGGUUGGGGGAGC	hsa-miR-6749-5p,U[C/U]GGGCCUGGGGUUGGGGGAGC	46	363	8	6.19096
411	hsa-miR-6749-3p	chr11	-	hsa-mir-6749	Yes (64891158-64902450:4:hetero:hsa-mir-192/hsa-mir-194-2/hsa-mir-6750/hsa-mir-6749)	2	rs11607725	64902402	G > A	5.5e-05	6	CUCCUCCCCUGCCUGGCCCAG	CUCCUUCCCUGCCUGGCCCAG	hsa-miR-6749-3p,CUCCU[C/U]CCCUGCCUGGCCCAG	965	1121	221	21.2484
411	hsa-miR-6749-3p	chr11	-	hsa-mir-6749	Yes (64891158-64902450:4:hetero:hsa-mir-192/hsa-mir-194-2/hsa-mir-6750/hsa-mir-6749)	2	rs749606097	64902400	G > A	9e-06	8	CUCCUCCCCUGCCUGGCCCAG	CUCCUCCUCUGCCUGGCCCAG	hsa-miR-6749-3p,CUCCUCC[C/U]CUGCCUGGCCCAG	965	869	413	45.1
412	hsa-miR-6879-5p	chr11	+	hsa-mir-6879	No	2	rs751493254	65018514	G > T	1.3e-05	5	CAGGGCAGGGAAGGUGGGAGAG	CAGGUCAGGGAAGGUGGGAGAG	hsa-miR-6879-5p,CAGG[G/U]CAGGGAAGGUGGGAGAG	591	362	34	7.35074
412	hsa-miR-6879-5p	chr11	+	hsa-mir-6879	No	2	rs764092292	65018513	G > A	1.3e-05	4	CAGGGCAGGGAAGGUGGGAGAG	CAGAGCAGGGAAGGUGGGAGAG	hsa-miR-6879-5p,CAG[G/A]GCAGGGAAGGUGGGAGAG	591	635	71	11.5898
413	hsa-miR-6879-3p	chr11	+	hsa-mir-6879	No	3	rs201379160	65018555	C > T	3.6e-05	6	UGUCACCCGCUCCUUGCCCAG	UGUCAUCCGCUCCUUGCCCAG	hsa-miR-6879-3p,UGUCA[C/U]CCGCUCCUUGCCCAG	532	355	29	6.67311
413	hsa-miR-6879-3p	chr11	+	hsa-mir-6879	No	3	rs74814065	65018557	C > T	0.004391	8	UGUCACCCGCUCCUUGCCCAG	UGUCACCUGCUCCUUGCCCAG	hsa-miR-6879-3p,UGUCACC[C/U]GCUCCUUGCCCAG	532	329	104	24.8588
413	hsa-miR-6879-3p	chr11	+	hsa-mir-6879	No	3	rs755763132	65018553	C > T	1.3e-05	4	UGUCACCCGCUCCUUGCCCAG	UGUUACCCGCUCCUUGCCCAG	hsa-miR-6879-3p,UGU[C/U]ACCCGCUCCUUGCCCAG	532	225	18	5.20266
414	hsa-miR-6751-5p	chr11	-	hsa-mir-6751	No	2	rs758359736	65129968	C > T	1e-05	6	UUGGGGGUGAGGUUGGUGUCUGG	UUGGGAGUGAGGUUGGUGUCUGG	hsa-miR-6751-5p,UUGGG[G/A]GUGAGGUUGGUGUCUGG	721	621	122	18.2325
414	hsa-miR-6751-5p	chr11	-	hsa-mir-6751	No	2	rs377612804	65129967	C > T	3.8e-05	7	UUGGGGGUGAGGUUGGUGUCUGG	UUGGGGAUGAGGUUGGUGUCUGG	hsa-miR-6751-5p,UUGGGG[G/A]UGAGGUUGGUGUCUGG	721	637	130	19.1825
415	hsa-miR-6751-3p	chr11	-	hsa-mir-6751	No	1	rs749989972	65129935	G > A	1.8e-05	2	ACUGAGCCUCUCUCUCUCCAG	AUUGAGCCUCUCUCUCUCCAG	hsa-miR-6751-3p,A[C/U]UGAGCCUCUCUCUCUCCAG	531	325	35	8.42518
416	hsa-miR-612	chr11	+	hsa-mir-612	No	0
417	hsa-miR-4690-5p	chr11	+	hsa-mir-4690	No	2	rs762767645	65636312	G > A	1.2e-05	3	GAGCAGGCGAGGCUGGGCUGAA	GAACAGGCGAGGCUGGGCUGAA	hsa-miR-4690-5p,GA[G/A]CAGGCGAGGCUGGGCUGAA	579	623	85	14.1526
417	hsa-miR-4690-5p	chr11	+	hsa-mir-4690	No	2	rs763979181	65636317	C > T	1.1e-05	8	GAGCAGGCGAGGCUGGGCUGAA	GAGCAGGUGAGGCUGGGCUGAA	hsa-miR-4690-5p,GAGCAGG[C/U]GAGGCUGGGCUGAA	579	521	239	43.5151
418	hsa-miR-4690-3p	chr11	+	hsa-mir-4690	No	2	rs780253227	65636352	C > G	6.4e-05	5	GCAGCCCAGCUGAGGCCUCUG	GCAGGCCAGCUGAGGCCUCUG	hsa-miR-4690-3p,GCAG[C/G]CCAGCUGAGGCCUCUG	637	635	126	19.8113
418	hsa-miR-4690-3p	chr11	+	hsa-mir-4690	No	2	rs749629127	65636353	C > T	9e-06	6	GCAGCCCAGCUGAGGCCUCUG	GCAGCUCAGCUGAGGCCUCUG	hsa-miR-4690-3p,GCAGC[C/U]CAGCUGAGGCCUCUG	637	635	85	13.3648
419	hsa-miR-4489	chr11	+	hsa-mir-4489	No	1	rs573571324	65649203	T > C	0.000229	7	UGGGGCUAGUGAUGCAGGACG	UGGGGCCAGUGAUGCAGGACG	hsa-miR-4489,UGGGGC[U/C]AGUGAUGCAGGACG	465	558	99	19.4353
420	hsa-miR-3163	chr11	-	hsa-mir-3163	No	0
421	hsa-miR-6860	chr11	+	hsa-mir-6860	No	2	rs770083443	67045686	G > T	2.4e-05	4	ACUGGGCAGGGCUGUGGUGAGU	ACUUGGCAGGGCUGUGGUGAGU	hsa-miR-6860,ACU[G/U]GGCAGGGCUGUGGUGAGU	876	570	81	11.4629
421	hsa-miR-6860	chr11	+	hsa-mir-6860	No	2	rs775743331	67045688	G > C	4.7e-05	6	ACUGGGCAGGGCUGUGGUGAGU	ACUGGCCAGGGCUGUGGUGAGU	hsa-miR-6860,ACUGG[G/C]CAGGGCUGUGGUGAGU	876	666	150	19.6382
422	hsa-miR-6752-5p	chr11	+	hsa-mir-6752	No	0
423	hsa-miR-6752-3p	chr11	+	hsa-mir-6752	No	1	rs760443460	67490296	C > G	0.000177	2	UCCCUGCCCCCAUACUCCCAG	UGCCUGCCCCCAUACUCCCAG	hsa-miR-6752-3p,U[C/G]CCUGCCCCCAUACUCCCAG	871	517	113	16.8393
424	hsa-miR-7113-5p	chr11	+	hsa-mir-7113	Yes (68032864-68033971:2:hetero:hsa-mir-7113/hsa-mir-4691)	1	rs536888936	68032868	A > G	0.0002	4	UCCAGGGAGACAGUGUGUGAG	UCCGGGGAGACAGUGUGUGAG	hsa-miR-7113-5p,UCC[A/G]GGGAGACAGUGUGUGAG	903	97	26	8.78504
425	hsa-miR-7113-3p	chr11	+	hsa-mir-7113	Yes (68032864-68033971:2:hetero:hsa-mir-7113/hsa-mir-4691)	0
426	hsa-miR-4691-5p	chr11	+	hsa-mir-4691	Yes (68032864-68033971:2:hetero:hsa-mir-7113/hsa-mir-4691)	0
427	hsa-miR-4691-3p	chr11	+	hsa-mir-4691	Yes (68032864-68033971:2:hetero:hsa-mir-7113/hsa-mir-4691)	1	rs181585480	68033953	C > T	0.000998	5	CCAGCCACGGACUGAGAGUGCAU	CCAGUCACGGACUGAGAGUGCAU	hsa-miR-4691-3p,CCAG[C/U]CACGGACUGAGAGUGCAU	789	656	80	11.1199
428	hsa-miR-6753-5p	chr11	+	hsa-mir-6753	No	1	rs777117289	68044796	C > A	1e-05	3	CACCAGGGCAGAGCAGGGCUGA	CAACAGGGCAGAGCAGGGCUGA	hsa-miR-6753-5p,CA[C/A]CAGGGCAGAGCAGGGCUGA	305	574	38	9.08192
429	hsa-miR-6753-3p	chr11	+	hsa-mir-6753	No	3	rs753872551	68044934	G > A	9e-06	3	UGGUCUGUCUCUGCCCUGGCAC	UGAUCUGUCUCUGCCCUGGCAC	hsa-miR-6753-3p,UG[G/A]UCUGUCUCUGCCCUGGCAC	334	240	12	4.2384
429	hsa-miR-6753-3p	chr11	+	hsa-mir-6753	No	3	rs560771556	68044935	T > A	1.6e-05	4	UGGUCUGUCUCUGCCCUGGCAC	UGGACUGUCUCUGCCCUGGCAC	hsa-miR-6753-3p,UGG[U/A]CUGUCUCUGCCCUGGCAC	334	294	16	5.10591
429	hsa-miR-6753-3p	chr11	+	hsa-mir-6753	No	3	rs542024448	68044933	G > A	3.3e-05	2	UGGUCUGUCUCUGCCCUGGCAC	UAGUCUGUCUCUGCCCUGGCAC	hsa-miR-6753-3p,U[G/A]GUCUGUCUCUGCCCUGGCAC	334	417	27	7.23473
430	hsa-miR-3164	chr11	+	hsa-mir-3164	No	0
431	hsa-miR-548k	chr11	+	hsa-mir-548k	No	0
432	hsa-miR-3664-5p	chr11	-	hsa-mir-3664	No	0
433	hsa-miR-3664-3p	chr11	-	hsa-mir-3664	No	0
434	hsa-miR-6754-5p	chr11	+	hsa-mir-6754	No	2	rs113246861	71473512	G > A	3.7e-05	5	CCAGGGAGGCUGGUUUGGAGGA	CCAGAGAGGCUGGUUUGGAGGA	hsa-miR-6754-5p,CCAG[G/A]GAGGCUGGUUUGGAGGA	828	988	172	19.0167
434	hsa-miR-6754-5p	chr11	+	hsa-mir-6754	No	2	rs781514949	71473510	A > G	9e-06	3	CCAGGGAGGCUGGUUUGGAGGA	CCGGGGAGGCUGGUUUGGAGGA	hsa-miR-6754-5p,CC[A/G]GGGAGGCUGGUUUGGAGGA	828	117	23	7.38958
435	hsa-miR-6754-3p	chr11	+	hsa-mir-6754	No	3	rs772153966	71473552	C > T	2.6e-05	7	UCUUCACCUGCCUCUGCCUGCA	UCUUCAUCUGCCUCUGCCUGCA	hsa-miR-6754-3p,UCUUCA[C/U]CUGCCUCUGCCUGCA	533	850	95	14.114
435	hsa-miR-6754-3p	chr11	+	hsa-mir-6754	No	3	rs748073446	71473551	A > C	0.000215	6	UCUUCACCUGCCUCUGCCUGCA	UCUUCCCCUGCCUCUGCCUGCA	hsa-miR-6754-3p,UCUUC[A/C]CCUGCCUCUGCCUGCA	533	1050	93	12.4315
435	hsa-miR-6754-3p	chr11	+	hsa-mir-6754	No	3	rs778604885	71473550	C > T	9e-06	5	UCUUCACCUGCCUCUGCCUGCA	UCUUUACCUGCCUCUGCCUGCA	hsa-miR-6754-3p,UCUU[C/U]ACCUGCCUCUGCCUGCA	533	553	54	9.94644
436	hsa-miR-3165	chr11	-	hsa-mir-3165	No	0
437	hsa-miR-139-5p	chr11	-	hsa-mir-139	No	0
438	hsa-miR-139-3p	chr11	-	hsa-mir-139	No	4	rs772384436	72615084	C > T	1.5e-05	5	UGGAGACGCGGCCCUGUUGGAGU	UGGAAACGCGGCCCUGUUGGAGU	hsa-miR-139-3p,UGGA[G/A]ACGCGGCCCUGUUGGAGU	186	186	24	12.9032
438	hsa-miR-139-3p	chr11	-	hsa-mir-139	No	4	rs779613892	72615081	C > A	1.5e-05	8	UGGAGACGCGGCCCUGUUGGAGU	UGGAGACUCGGCCCUGUUGGAGU	hsa-miR-139-3p,UGGAGAC[G/U]CGGCCCUGUUGGAGU	186	364	108	41.5065
438	hsa-miR-139-3p	chr11	-	hsa-mir-139	No	4	rs778212293	72615085	T > C	1.5e-05	4	UGGAGACGCGGCCCUGUUGGAGU	UGGGGACGCGGCCCUGUUGGAGU	hsa-miR-139-3p,UGG[A/G]GACGCGGCCCUGUUGGAGU	186	202	17	8.77035
438	hsa-miR-139-3p	chr11	-	hsa-mir-139	No	4	rs748510911	72615082	G > A	7.5e-05	7	UGGAGACGCGGCCCUGUUGGAGU	UGGAGAUGCGGCCCUGUUGGAGU	hsa-miR-139-3p,UGGAGA[C/U]GCGGCCCUGUUGGAGU	186	480	25	8.36687
439	hsa-miR-4692	chr11	+	hsa-mir-4692	No	0
440	hsa-miR-548al	chr11	+	hsa-mir-548al	No	1	rs515924	74399308	A > G	0.184661	8	AACGGCAAUGACUUUUGUACCA	AACGGCAGUGACUUUUGUACCA	hsa-miR-548al,AACGGCA[A/G]UGACUUUUGUACCA	70	57	8	12.665
441	hsa-miR-4696	chr11	-	hsa-mir-4696	No	0
442	hsa-miR-326	chr11	-	hsa-mir-326	No	0
443	hsa-miR-708-5p	chr11	-	hsa-mir-708	No	0
444	hsa-miR-708-3p	chr11	-	hsa-mir-708	No	1	rs770860828	79402049	A > C	4.6e-05	5	CAACUAGACUGUGAGCUUCUAG	CAACGAGACUGUGAGCUUCUAG	hsa-miR-708-3p,CAAC[U/G]AGACUGUGAGCUUCUAG	530	76	3	1.49478
445	hsa-miR-5579-5p	chr11	-	hsa-mir-5579	No	0
446	hsa-miR-5579-3p	chr11	-	hsa-mir-5579	No	0
447	hsa-miR-4300	chr11	-	hsa-mir-4300	No	0
448	hsa-miR-6755-5p	chr11	+	hsa-mir-6755	No	2	rs745839108	86278345	G > A	9e-06	8	UAGGGUAGACACUGACAACGUU	UAGGGUAAACACUGACAACGUU	hsa-miR-6755-5p,UAGGGUA[G/A]ACACUGACAACGUU	228	329	52	18.9862
448	hsa-miR-6755-5p	chr11	+	hsa-mir-6755	No	2	rs781148989	86278342	G > A	9e-06	5	UAGGGUAGACACUGACAACGUU	UAGGAUAGACACUGACAACGUU	hsa-miR-6755-5p,UAGG[G/A]UAGACACUGACAACGUU	228	282	20	7.88748
449	hsa-miR-6755-3p	chr11	+	hsa-mir-6755	No	0
450	hsa-miR-3166	chr11	+	hsa-mir-3166	No	0
451	hsa-miR-4490	chr11	-	hsa-mir-4490	No	0
452	hsa-miR-1261	chr11	-	hsa-mir-1261	No	1	rs752924983	90869197	A > G	9e-06	2	AUGGAUAAGGCUUUGGCUU	ACGGAUAAGGCUUUGGCUU	hsa-miR-1261,A[U/C]GGAUAAGGCUUUGGCUU	525	38	6	4.24795
453	hsa-miR-1304-5p	chr11	-	hsa-mir-1304	No	4	rs79759099	93733743	A > G	0.005636	3	UUUGAGGCUACAGUGAGAUGUG	UUCGAGGCUACAGUGAGAUGUG	hsa-miR-1304-5p,UU[U/C]GAGGCUACAGUGAGAUGUG	515	36	0	0
453	hsa-miR-1304-5p	chr11	-	hsa-mir-1304	No	4	rs779470949	93733739	C > T	1.3e-05	7	UUUGAGGCUACAGUGAGAUGUG	UUUGAGACUACAGUGAGAUGUG	hsa-miR-1304-5p,UUUGAG[G/A]CUACAGUGAGAUGUG	515	929	85	12.2887
453	hsa-miR-1304-5p	chr11	-	hsa-mir-1304	No	4	rs76857625	93733744	A > G	0.5	2	UUUGAGGCUACAGUGAGAUGUG	UCUGAGGCUACAGUGAGAUGUG	hsa-miR-1304-5p,U[U/C]UGAGGCUACAGUGAGAUGUG	515	935	97	13.9786
453	hsa-miR-1304-5p	chr11	-	hsa-mir-1304	No	4	rs748549386	93733740	C > A	1.3e-05	6	UUUGAGGCUACAGUGAGAUGUG	UUUGAUGCUACAGUGAGAUGUG	hsa-miR-1304-5p,UUUGA[G/U]GCUACAGUGAGAUGUG	515	448	38	7.91117
454	hsa-miR-1304-3p	chr11	-	hsa-mir-1304	No	1	rs756791611	93733709	G > T	1e-05	4	UCUCACUGUAGCCUCGAACCCC	UCUAACUGUAGCCUCGAACCCC	hsa-miR-1304-3p,UCU[C/A]ACUGUAGCCUCGAACCCC	644	326	40	8.72988
455	hsa-miR-548l	chr11	-	hsa-mir-548l	No	0
456	hsa-miR-1260b	chr11	+	hsa-mir-1260b	No	0
457	hsa-miR-3920	chr11	-	hsa-mir-3920	No	0
458	hsa-miR-4693-5p	chr11	+	hsa-mir-4693	No	0
459	hsa-miR-4693-3p	chr11	+	hsa-mir-4693	No	0
460	hsa-miR-7641	chr11	+	hsa-mir-7641-1	No	0
461	hsa-miR-4491	chr11	+	hsa-mir-4491	No	1	rs527936256	111347808	G > A	0.0002	7	AAUGUGGACUGGUGUGACCAAA	AAUGUGAACUGGUGUGACCAAA	hsa-miR-4491,AAUGUG[G/A]ACUGGUGUGACCAAA	474	905	87	13.2833
462	hsa-miR-34b-5p	chr11	+	hsa-mir-34b	Yes (111512949-111513505:2:homo:hsa-mir-34b/hsa-mir-34c)	1	rs751488269	111512951	A > G	0.000156	2	UAGGCAGUGUCAUUAGCUGAUUG	UGGGCAGUGUCAUUAGCUGAUUG	hsa-miR-34b-5p,U[A/G]GGCAGUGUCAUUAGCUGAUUG	898	845	184	21.1228
463	hsa-miR-34b-3p	chr11	+	hsa-mir-34b	Yes (111512949-111513505:2:homo:hsa-mir-34b/hsa-mir-34c)	1	rs376886963	111512988	A > G	0.000104	2	CAAUCACUAACUCCACUGCCAU	CGAUCACUAACUCCACUGCCAU	hsa-miR-34b-3p,C[A/G]AUCACUAACUCCACUGCCAU	742	335	52	10.4299
464	hsa-miR-34c-5p	chr11	+	hsa-mir-34c	Yes (111512949-111513505:2:homo:hsa-mir-34b/hsa-mir-34c)	0
465	hsa-miR-34c-3p	chr11	+	hsa-mir-34c	Yes (111512949-111513505:2:homo:hsa-mir-34b/hsa-mir-34c)	0
466	hsa-miR-4301	chr11	-	hsa-mir-4301	No	1	rs184176277	113450077	G > T	0.000399	2	UCCCACUACUUCACUUGUGA	UACCACUACUUCACUUGUGA	hsa-miR-4301,U[C/A]CCACUACUUCACUUGUGA	340	391	39	10.6964
467	hsa-miR-6716-5p	chr11	+	hsa-mir-6716	No	2	rs782434630	118644017	G > C	9e-06	3	UGGGAAUGGGGGUAAGGGCC	UGCGAAUGGGGGUAAGGGCC	hsa-miR-6716-5p,UG[G/C]GAAUGGGGGUAAGGGCC	517	29	2	1.63337
467	hsa-miR-6716-5p	chr11	+	hsa-mir-6716	No	2	rs781828899	118644016	G > A	9e-06	2	UGGGAAUGGGGGUAAGGGCC	UAGGAAUGGGGGUAAGGGCC	hsa-miR-6716-5p,U[G/A]GGAAUGGGGGUAAGGGCC	517	790	82	12.8308
468	hsa-miR-6716-3p	chr11	+	hsa-mir-6716	No	3	rs782371754	118644050	C > T	1.7e-05	3	UCCGAACUCUCCAUUCCUCUGC	UCUGAACUCUCCAUUCCUCUGC	hsa-miR-6716-3p,UC[C/U]GAACUCUCCAUUCCUCUGC	20	543	0	0
468	hsa-miR-6716-3p	chr11	+	hsa-mir-6716	No	3	rs782339650	118644053	A > G	9e-06	6	UCCGAACUCUCCAUUCCUCUGC	UCCGAGCUCUCCAUUCCUCUGC	hsa-miR-6716-3p,UCCGA[A/G]CUCUCCAUUCCUCUGC	20	28	0	0
468	hsa-miR-6716-3p	chr11	+	hsa-mir-6716	No	3	rs567834219	118644051	G > A	0.000108	4	UCCGAACUCUCCAUUCCUCUGC	UCCAAACUCUCCAUUCCUCUGC	hsa-miR-6716-3p,UCC[G/A]AACUCUCCAUUCCUCUGC	20	728	0	0
469	hsa-miR-4492	chr11	+	hsa-mir-4492	No	0
470	hsa-miR-3656	chr11	+	hsa-mir-3656	No	4	rs781847251	119018998	T > G	3.5e-05	7	GGCGGGUGCGGGGGUGG	GGCGGGGGCGGGGGUGG	hsa-miR-3656,GGCGGG[U/G]GCGGGGGUGG	35	175	3	3.83326
470	hsa-miR-3656	chr11	+	hsa-mir-3656	No	4	rs782138817	119018995	G > A	9e-06	4	GGCGGGUGCGGGGGUGG	GGCAGGUGCGGGGGUGG	hsa-miR-3656,GGC[G/A]GGUGCGGGGGUGG	35	470	5	3.89841
470	hsa-miR-3656	chr11	+	hsa-mir-3656	No	4	rs782766600	119018996	G > C	9e-06	5	GGCGGGUGCGGGGGUGG	GGCGCGUGCGGGGGUGG	hsa-miR-3656,GGCG[G/C]GUGCGGGGGUGG	35	17	0	0
470	hsa-miR-3656	chr11	+	hsa-mir-3656	No	4	rs552803376	119018994	C > T	0.0002	3	GGCGGGUGCGGGGGUGG	GGUGGGUGCGGGGGUGG	hsa-miR-3656,GG[C/U]GGGUGCGGGGGUGG	35	402	2	1.6861
471	hsa-miR-6756-5p	chr11	-	hsa-mir-6756	No	0
472	hsa-miR-6756-3p	chr11	-	hsa-mir-6756	No	0
473	hsa-miR-125b-5p	chr11	-	hsa-mir-125b-1	No	0
474	hsa-miR-125b-1-3p	chr11	-	hsa-mir-125b-1	No	1	rs771249128	122099788	C > A	1.7e-05	3	ACGGGUUAGGCUCUUGGGAGCU	ACUGGUUAGGCUCUUGGGAGCU	hsa-miR-125b-1-3p,AC[G/U]GGUUAGGCUCUUGGGAGCU	23	471	3	2.88235
475	hsa-let-7a-5p	chr11	-	hsa-let-7a-2	Yes (122146522-122152296:2:hetero:hsa-let-7a-2/hsa-mir-100)	0
476	hsa-let-7a-2-3p	chr11	-	hsa-let-7a-2	Yes (122146522-122152296:2:hetero:hsa-let-7a-2/hsa-mir-100)	0
477	hsa-miR-100-5p	chr11	-	hsa-mir-100	Yes (122146522-122152296:2:hetero:hsa-let-7a-2/hsa-mir-100)	1	rs777169031	122152293	G > A	8e-06	4	AACCCGUAGAUCCGAACUUGUG	AACUCGUAGAUCCGAACUUGUG	hsa-miR-100-5p,AAC[C/U]CGUAGAUCCGAACUUGUG	31	34	0	0
478	hsa-miR-100-3p	chr11	-	hsa-mir-100	Yes (122146522-122152296:2:hetero:hsa-let-7a-2/hsa-mir-100)	2	rs773933142	122152260	T > G	8e-06	2	CAAGCUUGUAUCUAUAGGUAUG	CCAGCUUGUAUCUAUAGGUAUG	hsa-miR-100-3p,C[A/C]AGCUUGUAUCUAUAGGUAUG	518	605	65	11.611
478	hsa-miR-100-3p	chr11	-	hsa-mir-100	Yes (122146522-122152296:2:hetero:hsa-let-7a-2/hsa-mir-100)	2	rs770590792	122152255	A > G	8e-06	7	CAAGCUUGUAUCUAUAGGUAUG	CAAGCUCGUAUCUAUAGGUAUG	hsa-miR-100-3p,CAAGCU[U/C]GUAUCUAUAGGUAUG	518	131	22	8.44544
479	hsa-miR-4493	chr11	-	hsa-mir-4493	No	0
480	hsa-miR-3167	chr11	-	hsa-mir-3167	No	0
481	hsa-miR-6090	chr11	+	hsa-mir-6090	No	0
482	hsa-miR-8052	chr11	+	hsa-mir-8052	No	0
483	hsa-miR-4697-5p	chr11	-	hsa-mir-4697	No	1	rs549326907	133898571	C > T	0.0002	2	AGGGGGCGCAGUCACUGACGUG	AAGGGGCGCAGUCACUGACGUG	hsa-miR-4697-5p,A[G/A]GGGGCGCAGUCACUGACGUG	383	220	48	16.536
484	hsa-miR-4697-3p	chr11	-	hsa-mir-4697	No	0
485	hsa-miR-3649	chr12	-	hsa-mir-3649	No	0
486	hsa-miR-200c-5p	chr12	+	hsa-mir-200c	Yes (6963702-6964176:2:homo:hsa-mir-200c/hsa-mir-141)	0
487	hsa-miR-200c-3p	chr12	+	hsa-mir-200c	Yes (6963702-6964176:2:homo:hsa-mir-200c/hsa-mir-141)	0
488	hsa-miR-141-5p	chr12	+	hsa-mir-141	Yes (6963702-6964176:2:homo:hsa-mir-200c/hsa-mir-141)	1	rs782509394	6964119	C > T	0.000511	7	CAUCUUCCAGUACAGUGUUGGA	CAUCUUUCAGUACAGUGUUGGA	hsa-miR-141-5p,CAUCUU[C/U]CAGUACAGUGUUGGA	676	1172	160	17.9756
489	hsa-miR-141-3p	chr12	+	hsa-mir-141	Yes (6963702-6964176:2:homo:hsa-mir-200c/hsa-mir-141)	0
490	hsa-miR-1244	chr12	-	hsa-mir-1244-3	No	1	rs757113970	9239490	A > G	8e-06	8	AAGUAGUUGGUUUGUAUGAGAUGGUU	AAGUAGUCGGUUUGUAUGAGAUGGUU	hsa-miR-1244,AAGUAGU[U/C]GGUUUGUAUGAGAUGGUU	499	307	152	38.8351
491	hsa-miR-1244	chr12	+	hsa-mir-1244-4	No	0
492	hsa-miR-613	chr12	+	hsa-mir-613	No	1	rs750266716	12764711	G > C	8e-06	3	AGGAAUGUUCCUUCUUUGCC	AGCAAUGUUCCUUCUUUGCC	hsa-miR-613,AG[G/C]AAUGUUCCUUCUUUGCC	692	532	67	11.0425
493	hsa-miR-614	chr12	+	hsa-mir-614	No	1	rs777853614	12915887	C > T	8e-06	6	GAACGCCUGUUCUUGCCAGGUGG	GAACGUCUGUUCUUGCCAGGUGG	hsa-miR-614,GAACG[C/U]CUGUUCUUGCCAGGUGG	22	51	1	2.98541
494	hsa-miR-3974	chr12	+	hsa-mir-3974	No	0
495	hsa-miR-920	chr12	+	hsa-mir-920	No	2	rs755656192	24212474	G > C	8e-06	4	GGGGAGCUGUGGAAGCAGUA	GGGCAGCUGUGGAAGCAGUA	hsa-miR-920,GGG[G/C]AGCUGUGGAAGCAGUA	399	643	57	11.2534
495	hsa-miR-920	chr12	+	hsa-mir-920	No	2	rs766480187	24212476	G > A	8e-06	6	GGGGAGCUGUGGAAGCAGUA	GGGGAACUGUGGAAGCAGUA	hsa-miR-920,GGGGA[G/A]CUGUGGAAGCAGUA	399	340	24	6.51606
496	hsa-miR-4302	chr12	-	hsa-mir-4302	No	1	rs141960509	25874064	C > T	0.000399	6	CCAGUGUGGCUCAGCGAG	CCAGUAUGGCUCAGCGAG	hsa-miR-4302,CCAGU[G/A]UGGCUCAGCGAG	719	632	80	11.8677
497	hsa-miR-7851-3p	chr12	-	hsa-mir-7851	No	1	rs756751311	42323758	G > A	3.1e-05	4	UACCUGGGAGACUGAGGUUGGA	UACUUGGGAGACUGAGGUUGGA	hsa-miR-7851-3p,UAC[C/U]UGGGAGACUGAGGUUGGA	364	533	38	8.62719
498	hsa-miR-4698	chr12	+	hsa-mir-4698	No	0
499	hsa-miR-4494	chr12	-	hsa-mir-4494	No	0
500	hsa-miR-6505-5p	chr12	+	hsa-mir-6505	No	0
501	hsa-miR-6505-3p	chr12	+	hsa-mir-6505	No	1	rs377146498	48132851	T > A	0.000149	5	UGACUUCUACCUCUUCCAAAG	UGACAUCUACCUCUUCCAAAG	hsa-miR-6505-3p,UGAC[U/A]UCUACCUCUUCCAAAG	483	455	45	9.59916
502	hsa-miR-1291	chr12	-	hsa-mir-1291	No	2	rs749038492	48654512	G > C	8e-06	6	UGGCCCUGACUGAAGACCAGCAGU	UGGCCGUGACUGAAGACCAGCAGU	hsa-miR-1291,UGGCC[C/G]UGACUGAAGACCAGCAGU	515	46	8	5.19766
502	hsa-miR-1291	chr12	-	hsa-mir-1291	No	2	rs779561709	48654511	A > T	1.7e-05	7	UGGCCCUGACUGAAGACCAGCAGU	UGGCCCAGACUGAAGACCAGCAGU	hsa-miR-1291,UGGCCC[U/A]GACUGAAGACCAGCAGU	515	610	74	13.2027
503	hsa-miR-4701-5p	chr12	-	hsa-mir-4701	No	2	rs752304189	48772029	T > C	1.1e-05	7	UUGGCCACCACACCUACCCCUU	UUGGCCGCCACACCUACCCCUU	hsa-miR-4701-5p,UUGGCC[A/G]CCACACCUACCCCUU	654	43	7	4.17422
503	hsa-miR-4701-5p	chr12	-	hsa-mir-4701	No	2	rs758015419	48772033	C > G	8e-06	3	UUGGCCACCACACCUACCCCUU	UUCGCCACCACACCUACCCCUU	hsa-miR-4701-5p,UU[G/C]GCCACCACACCUACCCCUU	654	31	3	2.10694
504	hsa-miR-4701-3p	chr12	-	hsa-mir-4701	No	2	rs761918018	48771994	A > T	1.8e-05	6	AUGGGUGAUGGGUGUGGUGU	AUGGGAGAUGGGUGUGGUGU	hsa-miR-4701-3p,AUGGG[U/A]GAUGGGUGUGGUGU	441	870	81	13.0769
504	hsa-miR-4701-3p	chr12	-	hsa-mir-4701	No	2	rs767887910	48771997	C > A	2.7e-05	3	AUGGGUGAUGGGUGUGGUGU	AUUGGUGAUGGGUGUGGUGU	hsa-miR-4701-3p,AU[G/U]GGUGAUGGGUGUGGUGU	441	519	41	8.57
505	hsa-miR-1293	chr12	-	hsa-mir-1293	No	1	rs762429414	50234199	A > C	0.00179	5	UGGGUGGUCUGGAGAUUUGUGC	UGGGGGGUCUGGAGAUUUGUGC	hsa-miR-1293,UGGG[U/G]GGUCUGGAGAUUUGUGC	615	476	97	17.928
506	hsa-miR-6757-5p	chr12	+	hsa-mir-6757	No	0
507	hsa-miR-6757-3p	chr12	+	hsa-mir-6757	No	2	rs771873045	53056992	C > A	1.3e-05	3	AACACUGGCCUUGCUAUCCCCA	AAAACUGGCCUUGCUAUCCCCA	hsa-miR-6757-3p,AA[C/A]ACUGGCCUUGCUAUCCCCA	710	1107	192	21.657
507	hsa-miR-6757-3p	chr12	+	hsa-mir-6757	No	2	rs747859868	53056991	A > G	3.9e-05	2	AACACUGGCCUUGCUAUCCCCA	AGCACUGGCCUUGCUAUCCCCA	hsa-miR-6757-3p,A[A/G]CACUGGCCUUGCUAUCCCCA	710	449	65	11.5123
508	hsa-miR-196a-5p	chr12	+	hsa-mir-196a-2	No	1	rs767877229	53991765	G > C	1e-05	4	UAGGUAGUUUCAUGUUGUUGGG	UAGCUAGUUUCAUGUUGUUGGG	hsa-miR-196a-5p,UAG[G/C]UAGUUUCAUGUUGUUGGG	300	237	23	8.62567
509	hsa-miR-196a-3p	chr12	+	hsa-mir-196a-2	No	1	rs530949885	53991800	G > A	1.9e-05	2	CGGCAACAAGAAACUGCCUGAG	CAGCAACAAGAAACUGCCUGAG	hsa-miR-196a-3p,C[G/A]GCAACAAGAAACUGCCUGAG	467	670	60	10.7264
510	hsa-miR-615-5p	chr12	+	hsa-mir-615	No	1	rs550225172	54033969	G > T	0.003218	3	GGGGGUCCCCGGUGCUCGGAUC	GGUGGUCCCCGGUGCUCGGAUC	hsa-miR-615-5p,GG[G/U]GGUCCCCGGUGCUCGGAUC	372	292	13	3.9444
511	hsa-miR-615-3p	chr12	+	hsa-mir-615	No	2	rs759124434	54034015	G > A	1.1e-05	6	UCCGAGCCUGGGUCUCCCUCUU	UCCGAACCUGGGUCUCCCUCUU	hsa-miR-615-3p,UCCGA[G/A]CCUGGGUCUCCCUCUU	48	18	1	3.40207
511	hsa-miR-615-3p	chr12	+	hsa-mir-615	No	2	rs539020510	54034013	G > A	0.000239	4	UCCGAGCCUGGGUCUCCCUCUU	UCCAAGCCUGGGUCUCCCUCUU	hsa-miR-615-3p,UCC[G/A]AGCCUGGGUCUCCCUCUU	48	412	2	1.4222
512	hsa-miR-3198	chr12	-	hsa-mir-3198-2	No	0
513	hsa-miR-148b-5p	chr12	+	hsa-mir-148b	No	1	rs774342221	54337241	A > G	1.7e-05	2	AAGUUCUGUUAUACACUCAGGC	AGGUUCUGUUAUACACUCAGGC	hsa-miR-148b-5p,A[A/G]GUUCUGUUAUACACUCAGGC	707	462	65	11.3732
514	hsa-miR-148b-3p	chr12	+	hsa-mir-148b	No	2	rs767601064	54337280	A > C	8e-06	3	UCAGUGCAUCACAGAACUUUGU	UCCGUGCAUCACAGAACUUUGU	hsa-miR-148b-3p,UC[A/C]GUGCAUCACAGAACUUUGU	674	42	5	2.97177
514	hsa-miR-148b-3p	chr12	+	hsa-mir-148b	No	2	rs773312042	54337285	A > G	2.5e-05	8	UCAGUGCAUCACAGAACUUUGU	UCAGUGCGUCACAGAACUUUGU	hsa-miR-148b-3p,UCAGUGC[A/G]UCACAGAACUUUGU	674	201	158	42.9269
515	hsa-miR-1228-5p	chr12	+	hsa-mir-1228	No	1	rs781225025	57194510	G > A	9e-06	7	GUGGGCGGGGGCAGGUGUGUG	GUGGGCAGGGGCAGGUGUGUG	hsa-miR-1228-5p,GUGGGC[G/A]GGGGCAGGUGUGUG	48	607	4	2.34339
516	hsa-miR-1228-3p	chr12	+	hsa-mir-1228	No	2	rs767862207	57194561	C > T	8e-06	7	UCACACCUGCCUCGCCCCCC	UCACACUUGCCUCGCCCCCC	hsa-miR-1228-3p,UCACAC[C/U]UGCCUCGCCCCCC	451	789	71	11.9023
516	hsa-miR-1228-3p	chr12	+	hsa-mir-1228	No	2	rs201449241	57194562	T > G	0.000117	8	UCACACCUGCCUCGCCCCCC	UCACACCGGCCUCGCCCCCC	hsa-miR-1228-3p,UCACACC[U/G]GCCUCGCCCCCC	451	210	144	46.7912
517	hsa-miR-6758-5p	chr12	+	hsa-mir-6758	No	1	rs769731252	57512695	G > C	9e-06	3	UAGAGAGGGGAAGGAUGUGAUGU	UACAGAGGGGAAGGAUGUGAUGU	hsa-miR-6758-5p,UA[G/C]AGAGGGGAAGGAUGUGAUGU	930	937	181	19.3895
518	hsa-miR-6758-3p	chr12	+	hsa-mir-6758	No	1	rs771148854	57512734	C > G	8e-06	4	ACUCAUUCUCCUCUGUCCAG	ACUGAUUCUCCUCUGUCCAG	hsa-miR-6758-3p,ACU[C/G]AUUCUCCUCUGUCCAG	775	722	119	15.9084
519	hsa-miR-616-5p	chr12	-	hsa-mir-616	No	1	rs757888437	57519239	T > C	1e-05	6	ACUCAAAACCCUUCAGUGACUU	ACUCAGAACCCUUCAGUGACUU	hsa-miR-616-5p,ACUCA[A/G]AACCCUUCAGUGACUU	1778	965	270	20.6127
520	hsa-miR-616-3p	chr12	-	hsa-mir-616	No	3	rs755336783	57519200	T > C	8e-06	5	AGUCAUUGGAGGGUUUGAGCAG	AGUCGUUGGAGGGUUUGAGCAG	hsa-miR-616-3p,AGUC[A/G]UUGGAGGGUUUGAGCAG	545	40	6	4.06371
520	hsa-miR-616-3p	chr12	-	hsa-mir-616	No	3	rs377525107	57519198	A > C	4.2e-05	7	AGUCAUUGGAGGGUUUGAGCAG	AGUCAUGGGAGGGUUUGAGCAG	hsa-miR-616-3p,AGUCAU[U/G]GGAGGGUUUGAGCAG	545	315	43	10.378
520	hsa-miR-616-3p	chr12	-	hsa-mir-616	No	3	rs368928238	57519199	A > G	6.7e-05	6	AGUCAUUGGAGGGUUUGAGCAG	AGUCACUGGAGGGUUUGAGCAG	hsa-miR-616-3p,AGUCA[U/C]UGGAGGGUUUGAGCAG	545	525	64	11.9647
521	hsa-miR-6759-5p	chr12	-	hsa-mir-6759	No	0
522	hsa-miR-6759-3p	chr12	-	hsa-mir-6759	No	0
523	hsa-miR-26a-5p	chr12	-	hsa-mir-26a-2	No	0
524	hsa-miR-26a-2-3p	chr12	-	hsa-mir-26a-2	No	1	rs768371795	57824638	T > C	9e-06	4	CCUAUUCUUGAUUACUUGUUUC	CCUGUUCUUGAUUACUUGUUUC	hsa-miR-26a-2-3p,CCU[A/G]UUCUUGAUUACUUGUUUC	533	588	65	11.6108
525	hsa-miR-6125	chr12	+	hsa-mir-6125	No	0
526	hsa-let-7i-5p	chr12	+	hsa-let-7i	No	0
527	hsa-let-7i-3p	chr12	+	hsa-let-7i	No	0
528	hsa-miR-548z	chr12	-	hsa-mir-548z	No	2	rs778859813	64622547	T > G	1.8e-05	6	CAAAAACCGCAAUUACUUUUGCA	CAAAACCCGCAAUUACUUUUGCA	hsa-miR-548z,CAAAA[A/C]CCGCAAUUACUUUUGCA	2820	1459	883	43.532
528	hsa-miR-548z	chr12	-	hsa-mir-548z	No	2	rs540698062	64622545	G > A	1.7e-05	8	CAAAAACCGCAAUUACUUUUGCA	CAAAAACUGCAAUUACUUUUGCA	hsa-miR-548z,CAAAAAC[C/U]GCAAUUACUUUUGCA	2820	2921	2149	74.8766
529	hsa-miR-548c-5p	chr12	+	hsa-mir-548c	No	2	rs374151873	64622540	A > G	1.7e-05	8	AAAAGUAAUUGCGGUUUUUGCC	AAAAGUAGUUGCGGUUUUUGCC	hsa-miR-548c-5p,AAAAGUA[A/G]UUGCGGUUUUUGCC	1737	1267	879	59.2517
529	hsa-miR-548c-5p	chr12	+	hsa-mir-548c	No	2	rs764336601	64622536	A > C	8e-06	4	AAAAGUAAUUGCGGUUUUUGCC	AAACGUAAUUGCGGUUUUUGCC	hsa-miR-548c-5p,AAA[A/C]GUAAUUGCGGUUUUUGCC	1737	114	32	7.19114
530	hsa-miR-548c-3p	chr12	+	hsa-mir-548c	No	0
531	hsa-miR-6074	chr12	-	hsa-mir-6074	No	0
532	hsa-miR-6502-5p	chr12	+	hsa-mir-6502	No	1	rs558348190	66251095	C > G	0.0002	5	AGCUCUAGAAAGAUUGUUGACC	AGCUGUAGAAAGAUUGUUGACC	hsa-miR-6502-5p,AGCU[C/G]UAGAAAGAUUGUUGACC	254	335	29	9.94166
533	hsa-miR-6502-3p	chr12	+	hsa-mir-6502	No	0
534	hsa-miR-1279	chr12	-	hsa-mir-1279	No	2	rs575587234	69273199	A > G	0.000473	6	UCAUAUUGCUUCUUUCU	UCAUACUGCUUCUUUCU	hsa-miR-1279,UCAUA[U/C]UGCUUCUUUCU	872	528	118	17.3903
534	hsa-miR-1279	chr12	-	hsa-mir-1279	No	2	rs781374931	69273201	A > G	9e-06	4	UCAUAUUGCUUCUUUCU	UCACAUUGCUUCUUUCU	hsa-miR-1279,UCA[U/C]AUUGCUUCUUUCU	872	1143	241	24.1399
535	hsa-miR-3913-5p	chr12	-	hsa-mir-3913-1	No	0
536	hsa-miR-3913-3p	chr12	-	hsa-mir-3913-1	No	0
537	hsa-miR-3913-5p	chr12	+	hsa-mir-3913-2	No	0
538	hsa-miR-3913-3p	chr12	+	hsa-mir-3913-2	No	0
539	hsa-miR-1252-5p	chr12	+	hsa-mir-1252	No	1	rs767091047	79419267	A > G	4.5e-05	7	AGAAGGAAAUUGAAUUCAUUUA	AGAAGGGAAUUGAAUUCAUUUA	hsa-miR-1252-5p,AGAAGG[A/G]AAUUGAAUUCAUUUA	1130	810	170	17.7692
540	hsa-miR-1252-3p	chr12	+	hsa-mir-1252	No	2	rs779199694	79419302	A > C	3.9e-05	7	CAAAUGAGCUUAAUUUCCUUUU	CAAAUGCGCUUAAUUUCCUUUU	hsa-miR-1252-3p,CAAAUG[A/C]GCUUAAUUUCCUUUU	1819	643	302	27.9245
540	hsa-miR-1252-3p	chr12	+	hsa-mir-1252	No	2	rs571351754	79419303	G > C	2.5e-05	8	CAAAUGAGCUUAAUUUCCUUUU	CAAAUGACCUUAAUUUCCUUUU	hsa-miR-1252-3p,CAAAUGA[G/C]CUUAAUUUCCUUUU	1819	1828	1233	67.6174
541	hsa-miR-617	chr12	-	hsa-mir-617	No	0
542	hsa-miR-618	chr12	-	hsa-mir-618	No	1	rs780705355	80935812	A > G	6.7e-05	7	AAACUCUACUUGUCCUUCUGAGU	AAACUCCACUUGUCCUUCUGAGU	hsa-miR-618,AAACUC[U/C]ACUUGUCCUUCUGAGU	626	504	78	13.8865
543	hsa-miR-4699-5p	chr12	+	hsa-mir-4699	No	0
544	hsa-miR-4699-3p	chr12	+	hsa-mir-4699	No	0
545	hsa-miR-5700	chr12	+	hsa-mir-5700	No	0
546	hsa-miR-7844-5p	chr12	-	hsa-mir-7844	No	0
547	hsa-miR-492	chr12	+	hsa-mir-492	No	1	rs536669293	94834433	T > C	1.6e-05	7	AGGACCUGCGGGACAAGAUUCUU	AGGACCCGCGGGACAAGAUUCUU	hsa-miR-492,AGGACC[U/C]GCGGGACAAGAUUCUU	205	68	5	4.23486
548	hsa-miR-331-5p	chr12	+	hsa-mir-331	Yes (95308444-95309949:2:hetero:hsa-mir-331/hsa-mir-3685)	0
549	hsa-miR-331-3p	chr12	+	hsa-mir-331	Yes (95308444-95309949:2:hetero:hsa-mir-331/hsa-mir-3685)	1	rs746807094	95308484	C > G	1.3e-05	5	GCCCCUGGGCCUAUCCUAGAA	GCCCGUGGGCCUAUCCUAGAA	hsa-miR-331-3p,GCCC[C/G]UGGGCCUAUCCUAGAA	491	76	9	4.65902
550	hsa-miR-3685	chr12	+	hsa-mir-3685	Yes (95308444-95309949:2:hetero:hsa-mir-331/hsa-mir-3685)	0
551	hsa-miR-1251-5p	chr12	+	hsa-mir-1251	No	1	rs750916143	97491916	C > G	4.2e-05	4	ACUCUAGCUGCCAAAGGCGCU	ACUGUAGCUGCCAAAGGCGCU	hsa-miR-1251-5p,ACU[C/G]UAGCUGCCAAAGGCGCU	299	405	22	6.32207
552	hsa-miR-1251-3p	chr12	+	hsa-mir-1251	No	0
553	hsa-miR-135a-5p	chr12	+	hsa-mir-135a-2	No	0
554	hsa-miR-4495	chr12	-	hsa-mir-4495	No	0
555	hsa-miR-4303	chr12	-	hsa-mir-4303	No	1	rs757370348	97995435	A > T	0.001603	4	UUCUGAGCUGAGGACAG	UUCAGAGCUGAGGACAG	hsa-miR-4303,UUC[U/A]GAGCUGAGGACAG	724	852	110	14.0057
556	hsa-miR-1827	chr12	+	hsa-mir-1827	No	0
557	hsa-miR-3652	chr12	+	hsa-mir-3652	No	1	rs751763590	103930426	G > A	8e-06	2	CGGCUGGAGGUGUGAGGA	CAGCUGGAGGUGUGAGGA	hsa-miR-3652,C[G/A]GCUGGAGGUGUGAGGA	1028	614	149	18.7545
558	hsa-miR-3922-3p	chr12	+	hsa-mir-3922	No	0
559	hsa-miR-3922-5p	chr12	+	hsa-mir-3922	No	0
560	hsa-miR-4496	chr12	+	hsa-mir-4496	No	0
561	hsa-miR-619-3p	chr12	-	hsa-mir-619	No	1	rs565469710	108836941	C > T	2.1e-05	6	GACCUGGACAUGUUUGUGCCCAGU	GACCUAGACAUGUUUGUGCCCAGU	hsa-miR-619-3p,GACCU[G/A]GACAUGUUUGUGCCCAGU	382	245	15	4.90317
562	hsa-miR-619-5p	chr12	-	hsa-mir-619	No	0
563	hsa-miR-4497	chr12	+	hsa-mir-4497	No	0
564	hsa-miR-6760-5p	chr12	+	hsa-mir-6760	No	0
565	hsa-miR-6760-3p	chr12	+	hsa-mir-6760	No	0
566	hsa-miR-6761-5p	chr12	+	hsa-mir-6761	No	0
567	hsa-miR-6761-3p	chr12	+	hsa-mir-6761	No	3	rs376773752	111799888	G > A	0.000105	7	UCCUACGCUGCUCUCUCACUCC	UCCUACACUGCUCUCUCACUCC	hsa-miR-6761-3p,UCCUAC[G/A]CUGCUCUCUCACUCC	16	319	2	2.79946
567	hsa-miR-6761-3p	chr12	+	hsa-mir-6761	No	3	rs200408280	111799887	C > T	0.000194	6	UCCUACGCUGCUCUCUCACUCC	UCCUAUGCUGCUCUCUCACUCC	hsa-miR-6761-3p,UCCUA[C/U]GCUGCUCUCUCACUCC	16	235	0	0
567	hsa-miR-6761-3p	chr12	+	hsa-mir-6761	No	3	rs139552439	111799883	C > T	0.002025	2	UCCUACGCUGCUCUCUCACUCC	UUCUACGCUGCUCUCUCACUCC	hsa-miR-6761-3p,U[C/U]CUACGCUGCUCUCUCACUCC	16	43	0	0
568	hsa-miR-3657	chr12	-	hsa-mir-3657	No	0
569	hsa-miR-6861-5p	chr12	-	hsa-mir-6861	No	1	rs756114700	112163309	T > C	1.6e-05	8	ACUGGGUAGGUGGGGCUCCAGG	ACUGGGUGGGUGGGGCUCCAGG	hsa-miR-6861-5p,ACUGGGU[A/G]GGUGGGGCUCCAGG	480	598	227	42.3696
570	hsa-miR-6861-3p	chr12	-	hsa-mir-6861	No	1	rs367606627	112163281	C > T	2.1e-05	2	UGGACCUCUCCUCCCCAG	UAGACCUCUCCUCCCCAG	hsa-miR-6861-3p,U[G/A]GACCUCUCCUCCCCAG	220	265	8	3.31326
571	hsa-miR-1302	chr12	-	hsa-mir-1302-1	No	1	rs74647838	112695096	G > A	0.021513	7	UUGGGACAUACUUAUGCUAAA	UUGGGAUAUACUUAUGCUAAA	hsa-miR-1302,UUGGGA[C/U]AUACUUAUGCUAAA	360	440	31	7.78904
572	hsa-miR-7106-5p	chr12	-	hsa-mir-7106	No	1	rs748897445	113159165	T > A	9e-06	8	UGGGAGGAGGGGAUCUUGGG	UGGGAGGUGGGGAUCUUGGG	hsa-miR-7106-5p,UGGGAGG[A/U]GGGGAUCUUGGG	1412	1118	795	63.2745
573	hsa-miR-7106-3p	chr12	-	hsa-mir-7106	No	0
574	hsa-miR-6762-5p	chr12	+	hsa-mir-6762	No	1	rs552487208	113291529	G > A	0.000179	2	CGGGGCCAUGGAGCAGCCUGUGU	CAGGGCCAUGGAGCAGCCUGUGU	hsa-miR-6762-5p,C[G/A]GGGCCAUGGAGCAGCCUGUGU	558	333	55	12.7592
575	hsa-miR-6762-3p	chr12	+	hsa-mir-6762	No	2	rs201143266	113291591	G > A	0.001916	6	UGGCUGCUUCCCUUGGUCUCCAG	UGGCUACUUCCCUUGGUCUCCAG	hsa-miR-6762-3p,UGGCU[G/A]CUUCCCUUGGUCUCCAG	561	217	22	6.30538
575	hsa-miR-6762-3p	chr12	+	hsa-mir-6762	No	2	rs765175789	113291588	G > C	1.5e-05	3	UGGCUGCUUCCCUUGGUCUCCAG	UGCCUGCUUCCCUUGGUCUCCAG	hsa-miR-6762-3p,UG[G/C]CUGCUUCCCUUGGUCUCCAG	561	402	48	10.1076
576	hsa-miR-620	chr12	-	hsa-mir-620	No	1	rs746008903	116148588	T > C	9e-06	7	AUGGAGAUAGAUAUAGAAAU	AUGGAGGUAGAUAUAGAAAU	hsa-miR-620,AUGGAG[A/G]UAGAUAUAGAAAU	625	536	79	13.6491
577	hsa-miR-4472	chr12	-	hsa-mir-4472-2	No	2	rs541407415	116428308	C > T	0.000399	4	GGUGGGGGGUGUUGUUUU	GGUAGGGGGUGUUGUUUU	hsa-miR-4472,GGU[G/A]GGGGGUGUUGUUUU	831	45	12	6.20547
577	hsa-miR-4472	chr12	-	hsa-mir-4472-2	No	2	rs11068023	116428309	A > C	0.349641	3	GGUGGGGGGUGUUGUUUU	GGGGGGGGGUGUUGUUUU	hsa-miR-4472,GG[U/G]GGGGGGUGUUGUUUU	831	525	142	21.4985
578	hsa-miR-1178-3p	chr12	-	hsa-mir-1178	No	0
579	hsa-miR-1178-5p	chr12	-	hsa-mir-1178	No	0
580	hsa-miR-4498	chr12	-	hsa-mir-4498	No	2	rs759230413	120155491	C > T	0.000142	4	UGGGCUGGCAGGGCAAGUGCUG	UGGACUGGCAGGGCAAGUGCUG	hsa-miR-4498,UGG[G/A]CUGGCAGGGCAAGUGCUG	944	346	57	9.97357
580	hsa-miR-4498	chr12	-	hsa-mir-4498	No	2	rs774370378	120155487	C > T	1.7e-05	8	UGGGCUGGCAGGGCAAGUGCUG	UGGGCUGACAGGGCAAGUGCUG	hsa-miR-4498,UGGGCUG[G/A]CAGGGCAAGUGCUG	944	742	429	51.2589
581	hsa-miR-4700-5p	chr12	+	hsa-mir-4700	No	0
582	hsa-miR-4700-3p	chr12	+	hsa-mir-4700	No	0
583	hsa-miR-7107-5p	chr12	-	hsa-mir-7107	No	3	rs539127530	121444343	G > A	1.7e-05	5	UCGGCCUGGGGAGGAGGAAGGG	UCGGUCUGGGGAGGAGGAAGGG	hsa-miR-7107-5p,UCGG[C/U]CUGGGGAGGAGGAAGGG	46	40	0	0
583	hsa-miR-7107-5p	chr12	-	hsa-mir-7107	No	3	rs782536354	121444345	C > A	9e-06	3	UCGGCCUGGGGAGGAGGAAGGG	UCUGCCUGGGGAGGAGGAAGGG	hsa-miR-7107-5p,UC[G/U]GCCUGGGGAGGAGGAAGGG	46	817	7	3.61084
583	hsa-miR-7107-5p	chr12	-	hsa-mir-7107	No	3	rs782634189	121444346	G > A	3.5e-05	2	UCGGCCUGGGGAGGAGGAAGGG	UUGGCCUGGGGAGGAGGAAGGG	hsa-miR-7107-5p,U[C/U]GGCCUGGGGAGGAGGAAGGG	46	463	6	4.11133
584	hsa-miR-7107-3p	chr12	-	hsa-mir-7107	No	2	rs782718364	121444304	C > T	4.4e-05	2	UGGUCUGUUCAUUCUCUCUUUUUGGCC	UAGUCUGUUCAUUCUCUCUUUUUGGCC	hsa-miR-7107-3p,U[G/A]GUCUGUUCAUUCUCUCUUUUUGGCC	334	417	27	7.23473
584	hsa-miR-7107-3p	chr12	-	hsa-mir-7107	No	2	rs782095639	121444299	C > G	9e-06	7	UGGUCUGUUCAUUCUCUCUUUUUGGCC	UGGUCUCUUCAUUCUCUCUUUUUGGCC	hsa-miR-7107-3p,UGGUCU[G/C]UUCAUUCUCUCUUUUUGGCC	334	376	21	5.92587
585	hsa-miR-4304	chr12	-	hsa-mir-4304	No	0
586	hsa-miR-8072	chr12	-	hsa-mir-8072	No	0
587	hsa-miR-3908	chr12	+	hsa-mir-3908	No	0
588	hsa-miR-6880-5p	chr12	-	hsa-mir-6880	No	0
589	hsa-miR-6880-3p	chr12	-	hsa-mir-6880	No	1	rs750532115	124337200	G > A	0.000129	2	CCGCCUUCUCUCCUCCCCCAG	CUGCCUUCUCUCCUCCCCCAG	hsa-miR-6880-3p,C[C/U]GCCUUCUCUCCUCCCCCAG	53	677	3	1.58376
590	hsa-miR-5188	chr12	+	hsa-mir-5188	No	0
591	hsa-miR-4419b	chr12	+	hsa-mir-4419b	No	0
592	hsa-miR-3612	chr12	+	hsa-mir-3612	No	0
593	hsa-miR-6763-5p	chr12	+	hsa-mir-6763	No	0
594	hsa-miR-6763-3p	chr12	+	hsa-mir-6763	No	0
595	hsa-miR-4499	chr13	-	hsa-mir-4499	No	0
596	hsa-miR-2276-3p	chr13	+	hsa-mir-2276	No	0
597	hsa-miR-2276-5p	chr13	+	hsa-mir-2276	No	0
598	hsa-miR-4305	chr13	-	hsa-mir-4305	No	2	rs138201016	39664119	G > T	0.011908	7	CCUAGACACCUCCAGUUC	CCUAGAAACCUCCAGUUC	hsa-miR-4305,CCUAGA[C/A]ACCUCCAGUUC	302	1069	71	12.4959
598	hsa-miR-4305	chr13	-	hsa-mir-4305	No	2	rs149597993	39664120	T > C	0.010038	6	CCUAGACACCUCCAGUUC	CCUAGGCACCUCCAGUUC	hsa-miR-4305,CCUAG[A/G]CACCUCCAGUUC	302	270	21	7.35417
599	hsa-miR-320d	chr13	-	hsa-mir-320d-1	No	2	rs535778068	40727842	C > G	0.000164	5	AAAAGCUGGGUUGAGAGGA	AAAACCUGGGUUGAGAGGA	hsa-miR-320d,AAAA[G/C]CUGGGUUGAGAGGA	1097	780	205	22.1617
599	hsa-miR-320d	chr13	-	hsa-mir-320d-1	No	2	rs569951817	40727839	C > T	0.000143	8	AAAAGCUGGGUUGAGAGGA	AAAAGCUAGGUUGAGAGGA	hsa-miR-320d,AAAAGCU[G/A]GGUUGAGAGGA	1097	1132	598	53.663
600	hsa-miR-621	chr13	+	hsa-mir-621	No	1	rs749156194	40810830	A > G	8e-06	5	GGCUAGCAACAGCGCUUACCU	GGCUGGCAACAGCGCUUACCU	hsa-miR-621,GGCU[A/G]GCAACAGCGCUUACCU	168	511	13	4.43689
601	hsa-miR-3168	chr13	-	hsa-mir-3168	No	0
602	hsa-miR-5006-5p	chr13	-	hsa-mir-5006	No	2	rs753832045	41568374	A > G	1.3e-05	2	UUGCCAGGGCAGGAGGUGGAA	UCGCCAGGGCAGGAGGUGGAA	hsa-miR-5006-5p,U[U/C]GCCAGGGCAGGAGGUGGAA	514	38	2	1.43106
602	hsa-miR-5006-5p	chr13	-	hsa-mir-5006	No	2	rs779670354	41568372	G > A	2.6e-05	4	UUGCCAGGGCAGGAGGUGGAA	UUGUCAGGGCAGGAGGUGGAA	hsa-miR-5006-5p,UUG[C/U]CAGGGCAGGAGGUGGAA	514	409	38	8.28782
603	hsa-miR-5006-3p	chr13	-	hsa-mir-5006	No	2	rs776069195	41568323	G > A	2.6e-05	4	UUUCCCUUUCCAUCCUGGCAG	UUUUCCUUUCCAUCCUGGCAG	hsa-miR-5006-3p,UUU[C/U]CCUUUCCAUCCUGGCAG	1243	2426	503	28.9659
603	hsa-miR-5006-3p	chr13	-	hsa-mir-5006	No	2	rs765466007	41568322	G > A	2.6e-05	5	UUUCCCUUUCCAUCCUGGCAG	UUUCUCUUUCCAUCCUGGCAG	hsa-miR-5006-3p,UUUC[C/U]CUUUCCAUCCUGGCAG	1243	1864	380	24.9646
604	hsa-miR-8079	chr13	-	hsa-mir-8079	No	0
605	hsa-miR-3613-5p	chr13	-	hsa-mir-3613	No	0
606	hsa-miR-3613-3p	chr13	-	hsa-mir-3613	No	0
607	hsa-miR-16-5p	chr13	-	hsa-mir-16-1	Yes (50048984-50049188:2:homo:hsa-mir-16-1/hsa-mir-15a)	0
608	hsa-miR-16-1-3p	chr13	-	hsa-mir-16-1	Yes (50048984-50049188:2:homo:hsa-mir-16-1/hsa-mir-15a)	0
609	hsa-miR-15a-5p	chr13	-	hsa-mir-15a	Yes (50048984-50049188:2:homo:hsa-mir-16-1/hsa-mir-15a)	0
610	hsa-miR-15a-3p	chr13	-	hsa-mir-15a	Yes (50048984-50049188:2:homo:hsa-mir-16-1/hsa-mir-15a)	1	rs762130418	50049146	G > T	9e-06	6	CAGGCCAUAUUGUGCUGCCUCA	CAGGCAAUAUUGUGCUGCCUCA	hsa-miR-15a-3p,CAGGC[C/A]AUAUUGUGCUGCCUCA	461	628	47	8.73509
611	hsa-miR-5693	chr13	-	hsa-mir-5693	No	0
612	hsa-miR-4703-5p	chr13	+	hsa-mir-4703	No	0
613	hsa-miR-4703-3p	chr13	+	hsa-mir-4703	No	0
614	hsa-miR-759	chr13	+	hsa-mir-759	No	1	rs144233096	52810074	C > G	0.002775	2	GCAGAGUGCAAACAAUUUUGAC	GGAGAGUGCAAACAAUUUUGAC	hsa-miR-759,G[C/G]AGAGUGCAAACAAUUUUGAC	541	312	31	7.54546
615	hsa-miR-1297	chr13	-	hsa-mir-1297	No	0
616	hsa-miR-5007-5p	chr13	+	hsa-mir-5007	No	1	rs191336981	55174475	A > G	0.0002	2	UAGAGUCUGGCUGAUAUGGUUU	UGGAGUCUGGCUGAUAUGGUUU	hsa-miR-5007-5p,U[A/G]GAGUCUGGCUGAUAUGGUUU	360	347	33	9.3368
617	hsa-miR-5007-3p	chr13	+	hsa-mir-5007	No	1	rs184597603	55174514	A > G	0.0002	6	AUCAUAUGAACCAAACUCUAAU	AUCAUGUGAACCAAACUCUAAU	hsa-miR-5007-3p,AUCAU[A/G]UGAACCAAACUCUAAU	821	657	127	17.2922
618	hsa-miR-3169	chr13	-	hsa-mir-3169	No	0
619	hsa-miR-548x-3p	chr13	-	hsa-mir-548x-2	No	0
620	hsa-miR-4704-5p	chr13	+	hsa-mir-4704	No	0
621	hsa-miR-4704-3p	chr13	+	hsa-mir-4704	No	0
622	hsa-miR-3665	chr13	-	hsa-mir-3665	No	0
623	hsa-miR-4500	chr13	-	hsa-mir-4500	No	0
624	hsa-miR-622	chr13	+	hsa-mir-622	No	3	rs752520667	90231246	T > C	9e-06	5	ACAGUCUGCUGAGGUUGGAGC	ACAGCCUGCUGAGGUUGGAGC	hsa-miR-622,ACAG[U/C]CUGCUGAGGUUGGAGC	588	673	79	12.5583
624	hsa-miR-622	chr13	+	hsa-mir-622	No	3	rs758234334	90231247	C > T	2.6e-05	6	ACAGUCUGCUGAGGUUGGAGC	ACAGUUUGCUGAGGUUGGAGC	hsa-miR-622,ACAGU[C/U]UGCUGAGGUUGGAGC	588	1063	127	16.0638
624	hsa-miR-622	chr13	+	hsa-mir-622	No	3	rs574914997	90231248	T > G	0.000715	7	ACAGUCUGCUGAGGUUGGAGC	ACAGUCGGCUGAGGUUGGAGC	hsa-miR-622,ACAGUC[U/G]GCUGAGGUUGGAGC	588	29	2	1.53159
625	hsa-miR-17-5p	chr13	+	hsa-mir-17	Yes (91350617-91351382:6:HHC:hsa-mir-17/hsa-mir-18a/hsa-mir-19a/hsa-mir-20a/hsa-mir-19b-1/hsa-mir-92a-1)	0
626	hsa-miR-17-3p	chr13	+	hsa-mir-17	Yes (91350617-91351382:6:HHC:hsa-mir-17/hsa-mir-18a/hsa-mir-19a/hsa-mir-20a/hsa-mir-19b-1/hsa-mir-92a-1)	0
627	hsa-miR-18a-5p	chr13	+	hsa-mir-18a	Yes (91350617-91351382:6:HHC:hsa-mir-17/hsa-mir-18a/hsa-mir-19a/hsa-mir-20a/hsa-mir-19b-1/hsa-mir-92a-1)	0
628	hsa-miR-18a-3p	chr13	+	hsa-mir-18a	Yes (91350617-91351382:6:HHC:hsa-mir-17/hsa-mir-18a/hsa-mir-19a/hsa-mir-20a/hsa-mir-19b-1/hsa-mir-92a-1)	0
629	hsa-miR-19a-5p	chr13	+	hsa-mir-19a	Yes (91350617-91351382:6:HHC:hsa-mir-17/hsa-mir-18a/hsa-mir-19a/hsa-mir-20a/hsa-mir-19b-1/hsa-mir-92a-1)	2	rs780315531	91350911	C > T	2.5e-05	8	AGUUUUGCAUAGUUGCACUACA	AGUUUUGUAUAGUUGCACUACA	hsa-miR-19a-5p,AGUUUUG[C/U]AUAGUUGCACUACA	985	1270	600	53.6453
629	hsa-miR-19a-5p	chr13	+	hsa-mir-19a	Yes (91350617-91351382:6:HHC:hsa-mir-17/hsa-mir-18a/hsa-mir-19a/hsa-mir-20a/hsa-mir-19b-1/hsa-mir-92a-1)	2	rs756288295	91350905	G > A	8e-06	2	AGUUUUGCAUAGUUGCACUACA	AAUUUUGCAUAGUUGCACUACA	hsa-miR-19a-5p,A[G/A]UUUUGCAUAGUUGCACUACA	985	1553	297	24.0133
630	hsa-miR-19a-3p	chr13	+	hsa-mir-19a	Yes (91350617-91351382:6:HHC:hsa-mir-17/hsa-mir-18a/hsa-mir-19a/hsa-mir-20a/hsa-mir-19b-1/hsa-mir-92a-1)	1	rs749350150	91350942	G > A	8e-06	4	UGUGCAAAUCUAUGCAAAACUGA	UGUACAAAUCUAUGCAAAACUGA	hsa-miR-19a-3p,UGU[G/A]CAAAUCUAUGCAAAACUGA	947	1406	221	19.1525
631	hsa-miR-20a-5p	chr13	+	hsa-mir-20a	Yes (91350617-91351382:6:HHC:hsa-mir-17/hsa-mir-18a/hsa-mir-19a/hsa-mir-20a/hsa-mir-19b-1/hsa-mir-92a-1)	0
632	hsa-miR-20a-3p	chr13	+	hsa-mir-20a	Yes (91350617-91351382:6:HHC:hsa-mir-17/hsa-mir-18a/hsa-mir-19a/hsa-mir-20a/hsa-mir-19b-1/hsa-mir-92a-1)	2	rs754002158	91351113	A > G	1.7e-05	6	ACUGCAUUAUGAGCACUUAAAG	ACUGCGUUAUGAGCACUUAAAG	hsa-miR-20a-3p,ACUGC[A/G]UUAUGAGCACUUAAAG	850	47	10	5.00313
632	hsa-miR-20a-3p	chr13	+	hsa-mir-20a	Yes (91350617-91351382:6:HHC:hsa-mir-17/hsa-mir-18a/hsa-mir-19a/hsa-mir-20a/hsa-mir-19b-1/hsa-mir-92a-1)	2	rs759748416	91351115	T > C	8e-06	8	ACUGCAUUAUGAGCACUUAAAG	ACUGCAUCAUGAGCACUUAAAG	hsa-miR-20a-3p,ACUGCAU[U/C]AUGAGCACUUAAAG	850	649	312	42.0071
633	hsa-miR-19b-1-5p	chr13	+	hsa-mir-19b-1	Yes (91350617-91351382:6:HHC:hsa-mir-17/hsa-mir-18a/hsa-mir-19a/hsa-mir-20a/hsa-mir-19b-1/hsa-mir-92a-1)	0
634	hsa-miR-19b-3p	chr13	+	hsa-mir-19b-1	Yes (91350617-91351382:6:HHC:hsa-mir-17/hsa-mir-18a/hsa-mir-19a/hsa-mir-20a/hsa-mir-19b-1/hsa-mir-92a-1)	0
635	hsa-miR-92a-1-5p	chr13	+	hsa-mir-92a-1	Yes (91350617-91351382:6:HHC:hsa-mir-17/hsa-mir-18a/hsa-mir-19a/hsa-mir-20a/hsa-mir-19b-1/hsa-mir-92a-1)	0
636	hsa-miR-92a-3p	chr13	+	hsa-mir-92a-1	Yes (91350617-91351382:6:HHC:hsa-mir-17/hsa-mir-18a/hsa-mir-19a/hsa-mir-20a/hsa-mir-19b-1/hsa-mir-92a-1)	0
637	hsa-miR-548as-5p	chr13	+	hsa-mir-548as	No	0
638	hsa-miR-548as-3p	chr13	+	hsa-mir-548as	No	0
639	hsa-miR-4501	chr13	+	hsa-mir-4501	No	0
640	hsa-miR-3170	chr13	+	hsa-mir-3170	No	0
641	hsa-miR-623	chr13	+	hsa-mir-623	No	0
642	hsa-miR-4306	chr13	+	hsa-mir-4306	No	0
643	hsa-miR-2681-5p	chr13	-	hsa-mir-2681	No	0
644	hsa-miR-2681-3p	chr13	-	hsa-mir-2681	No	0
645	hsa-miR-4705	chr13	-	hsa-mir-4705	No	0
646	hsa-miR-1267	chr13	-	hsa-mir-1267	No	0
647	hsa-miR-8073	chr13	+	hsa-mir-8073	No	1	rs200984263	110340972	G > T	0.000399	5	ACCUGGCAGCAGGGAGCGUCGU	ACCUUGCAGCAGGGAGCGUCGU	hsa-miR-8073,ACCU[G/U]GCAGCAGGGAGCGUCGU	716	335	40	8.16735
648	hsa-miR-8075	chr13	+	hsa-mir-8075	No	0
649	hsa-miR-548ar-5p	chr13	+	hsa-mir-548ar	No	0
650	hsa-miR-548ar-3p	chr13	+	hsa-mir-548ar	No	0
651	hsa-miR-4502	chr13	+	hsa-mir-4502	No	0
652	hsa-miR-6717-5p	chr14	-	hsa-mir-6717	No	2	rs150596480	21023372	C > T	0.001362	5	AGGCGAUGUGGGGAUGUAGAGA	AGGCAAUGUGGGGAUGUAGAGA	hsa-miR-6717-5p,AGGC[G/A]AUGUGGGGAUGUAGAGA	37	460	1	0.766514
652	hsa-miR-6717-5p	chr14	-	hsa-mir-6717	No	2	rs117650137	21023373	G > A	0.045922	4	AGGCGAUGUGGGGAUGUAGAGA	AGGUGAUGUGGGGAUGUAGAGA	hsa-miR-6717-5p,AGG[C/U]GAUGUGGGGAUGUAGAGA	37	375	0	0
653	hsa-miR-4707-5p	chr14	-	hsa-mir-4707	No	0
654	hsa-miR-4707-3p	chr14	-	hsa-mir-4707	No	1	rs2273626	22956973	C > A	0.479649	6	AGCCCGCCCCAGCCGAGGUUCU	AGCCCUCCCCAGCCGAGGUUCU	hsa-miR-4707-3p,AGCCC[G/U]CCCCAGCCGAGGUUCU	103	488	12	5.35245
655	hsa-miR-208a-3p	chr14	-	hsa-mir-208a	No	1	rs756125941	23388617	G > A	1.7e-05	7	AUAAGACGAGCAAAAAGCUUGU	AUAAGAUGAGCAAAAAGCUUGU	hsa-miR-208a-3p,AUAAGA[C/U]GAGCAAAAAGCUUGU	242	761	63	14.6805
656	hsa-miR-208a-5p	chr14	-	hsa-mir-208a	No	1	rs747303454	23388655	G > A	3.3e-05	4	GAGCUUUUGGCCCGGGUUAUAC	GAGUUUUUGGCCCGGGUUAUAC	hsa-miR-208a-5p,GAG[C/U]UUUUGGCCCGGGUUAUAC	1039	1820	379	27.561
657	hsa-miR-208b-3p	chr14	-	hsa-mir-208b	No	2	rs529038494	23418011	C > T	1.6e-05	8	AUAAGACGAACAAAAGGUUUGU	AUAAGACAAACAAAAGGUUUGU	hsa-miR-208b-3p,AUAAGAC[G/A]AACAAAAGGUUUGU	242	796	199	45.3408
657	hsa-miR-208b-3p	chr14	-	hsa-mir-208b	No	2	rs748052085	23418012	G > A	0.000116	7	AUAAGACGAACAAAAGGUUUGU	AUAAGAUGAACAAAAGGUUUGU	hsa-miR-208b-3p,AUAAGA[C/U]GAACAAAAGGUUUGU	242	761	63	14.6805
658	hsa-miR-208b-5p	chr14	-	hsa-mir-208b	No	0
659	hsa-miR-7703	chr14	-	hsa-mir-7703	No	2	rs763605434	24143510	A > G	8e-06	2	UUGCACUCUGGCCUUCUCCCAGG	UCGCACUCUGGCCUUCUCCCAGG	hsa-miR-7703,U[U/C]GCACUCUGGCCUUCUCCCAGG	403	20	1	1.11386
659	hsa-miR-7703	chr14	-	hsa-mir-7703	No	2	rs760236481	24143504	G > A	8e-06	8	UUGCACUCUGGCCUUCUCCCAGG	UUGCACUUUGGCCUUCUCCCAGG	hsa-miR-7703,UUGCACU[C/U]UGGCCUUCUCCCAGG	403	623	220	43.9062
660	hsa-miR-4307	chr14	+	hsa-mir-4307	No	0
661	hsa-miR-3171	chr14	-	hsa-mir-3171	No	0
662	hsa-miR-624-5p	chr14	-	hsa-mir-624	No	1	rs778437262	31014725	C > G	9.1e-05	3	UAGUACCAGUACCUUGUGUUCA	UACUACCAGUACCUUGUGUUCA	hsa-miR-624-5p,UA[G/C]UACCAGUACCUUGUGUUCA	297	316	24	7.83411
663	hsa-miR-624-3p	chr14	-	hsa-mir-624	No	0
664	hsa-miR-4503	chr14	-	hsa-mir-4503	No	0
665	hsa-miR-548y	chr14	-	hsa-mir-548y	No	0
666	hsa-miR-6076	chr14	+	hsa-mir-6076	No	1	rs773303605	49966401	C > T	0.033333	3	AGCAUGACAGAGGAGAGGUGG	AGUAUGACAGAGGAGAGGUGG	hsa-miR-6076,AG[C/U]AUGACAGAGGAGAGGUGG	333	294	23	7.35076
667	hsa-miR-4504	chr14	-	hsa-mir-4504	No	0
668	hsa-miR-5580-5p	chr14	-	hsa-mir-5580	No	0
669	hsa-miR-5580-3p	chr14	-	hsa-mir-5580	No	0
670	hsa-miR-4308	chr14	-	hsa-mir-4308	No	0
671	hsa-miR-5586-5p	chr14	-	hsa-mir-5586	No	0
672	hsa-miR-5586-3p	chr14	-	hsa-mir-5586	No	1	rs549666512	59646979	C > T	0.001997	5	CAGAGUGACAAGCUGGUUAAAG	CAGAAUGACAAGCUGGUUAAAG	hsa-miR-5586-3p,CAGA[G/A]UGACAAGCUGGUUAAAG	423	924	75	11.9965
673	hsa-miR-548h-5p	chr14	-	hsa-mir-548h-1	No	0
674	hsa-miR-7855-5p	chr14	-	hsa-mir-7855	No	2	rs757451936	64785681	C > G	8e-06	4	UUGGUGAGGACCCCAAGCUCGG	UUGCUGAGGACCCCAAGCUCGG	hsa-miR-7855-5p,UUG[G/C]UGAGGACCCCAAGCUCGG	434	616	54	10.4438
674	hsa-miR-7855-5p	chr14	-	hsa-mir-7855	No	2	rs575714095	64785683	A > G	0.000111	2	UUGGUGAGGACCCCAAGCUCGG	UCGGUGAGGACCCCAAGCUCGG	hsa-miR-7855-5p,U[U/C]GGUGAGGACCCCAAGCUCGG	434	34	4	3.29288
675	hsa-miR-4706	chr14	+	hsa-mir-4706	No	1	rs72728267	65044703	G > T	0.009281	7	AGCGGGGAGGAAGUGGGCGCUGCUU	AGCGGGUAGGAAGUGGGCGCUGCUU	hsa-miR-4706,AGCGGG[G/U]AGGAAGUGGGCGCUGCUU	109	16	1	2.39457
676	hsa-miR-4708-5p	chr14	-	hsa-mir-4708	No	0
677	hsa-miR-4708-3p	chr14	-	hsa-mir-4708	No	0
678	hsa-miR-625-5p	chr14	+	hsa-mir-625	No	1	rs372863864	65471117	G > A	0.000103	2	AGGGGGAAAGUUCUAUAGUCC	AAGGGGAAAGUUCUAUAGUCC	hsa-miR-625-5p,A[G/A]GGGGAAAGUUCUAUAGUCC	909	782	155	18.3843
679	hsa-miR-625-3p	chr14	+	hsa-mir-625	No	0
680	hsa-miR-5694	chr14	-	hsa-mir-5694	No	0
681	hsa-miR-7843-5p	chr14	+	hsa-mir-7843	No	0
682	hsa-miR-7843-3p	chr14	+	hsa-mir-7843	No	0
683	hsa-miR-4505	chr14	+	hsa-mir-4505	No	0
684	hsa-miR-4709-5p	chr14	-	hsa-mir-4709	No	0
685	hsa-miR-4709-3p	chr14	-	hsa-mir-4709	No	1	rs531138136	74480156	A > G	3.3e-05	2	UUGAAGAGGAGGUGCUCUGUAGC	UCGAAGAGGAGGUGCUCUGUAGC	hsa-miR-4709-3p,U[U/C]GAAGAGGAGGUGCUCUGUAGC	893	54	11	5.00922
686	hsa-miR-7641	chr14	+	hsa-mir-7641-2	No	0
687	hsa-miR-1260a	chr14	+	hsa-mir-1260a	No	1	rs774008120	77266238	C > A	8e-06	8	AUCCCACCUCUGCCACCA	AUCCCACAUCUGCCACCA	hsa-miR-1260a,AUCCCAC[C/A]UCUGCCACCA	703	693	265	37.9666
688	hsa-miR-4506	chr14	-	hsa-mir-4506	No	0
689	hsa-miR-3173-3p	chr14	-	hsa-mir-3173	No	0
690	hsa-miR-3173-5p	chr14	-	hsa-mir-3173	No	0
691	hsa-miR-151b	chr14	-	hsa-mir-151b	No	1	rs530616727	100109454	G > A	0.000333	2	UCGAGGAGCUCACAGUCU	UUGAGGAGCUCACAGUCU	hsa-miR-151b,U[C/U]GAGGAGCUCACAGUCU	49	539	5	3.07665
692	hsa-miR-342-5p	chr14	+	hsa-mir-342	No	1	rs752423769	100109675	G > A	2.1e-05	3	AGGGGUGCUAUCUGUGAUUGA	AGAGGUGCUAUCUGUGAUUGA	hsa-miR-342-5p,AG[G/A]GGUGCUAUCUGUGAUUGA	619	409	55	10.9309
693	hsa-miR-342-3p	chr14	+	hsa-mir-342	No	1	rs560521928	100109722	C > A	0.0002	8	UCUCACACAGAAAUCGCACCCGU	UCUCACAAAGAAAUCGCACCCGU	hsa-miR-342-3p,UCUCACA[C/A]AGAAAUCGCACCCGU	700	750	327	45.1303
694	hsa-miR-6764-5p	chr14	+	hsa-mir-6764	No	0
695	hsa-miR-6764-3p	chr14	+	hsa-mir-6764	No	2	rs775485933	100277404	T > G	8e-06	8	UCUCUGGUCUUUCCUUGACAG	UCUCUGGGCUUUCCUUGACAG	hsa-miR-6764-3p,UCUCUGG[U/G]CUUUCCUUGACAG	663	819	335	45.4617
695	hsa-miR-6764-3p	chr14	+	hsa-mir-6764	No	2	rs770888956	100277399	T > G	8e-06	3	UCUCUGGUCUUUCCUUGACAG	UCGCUGGUCUUUCCUUGACAG	hsa-miR-6764-3p,UC[U/G]CUGGUCUUUCCUUGACAG	663	43	5	2.96128
696	hsa-miR-345-5p	chr14	+	hsa-mir-345	No	0
697	hsa-miR-345-3p	chr14	+	hsa-mir-345	No	0
698	hsa-miR-2392	chr14	+	hsa-mir-2392	No	1	rs118055959	100814555	A > G	0.003195	5	UAGGAUGGGGGUGAGAGGUG	UAGGGUGGGGGUGAGAGGUG	hsa-miR-2392,UAGG[A/G]UGGGGGUGAGAGGUG	452	362	40	9.88864
699	hsa-miR-770-5p	chr14	+	hsa-mir-770	No	2	rs752899126	100852414	T > C	8e-06	6	UCCAGUACCACGUGUCAGGGCCA	UCCAGCACCACGUGUCAGGGCCA	hsa-miR-770-5p,UCCAG[U/C]ACCACGUGUCAGGGCCA	352	821	41	7.62678
699	hsa-miR-770-5p	chr14	+	hsa-mir-770	No	2	rs765420437	100852412	A > G	8e-06	4	UCCAGUACCACGUGUCAGGGCCA	UCCGGUACCACGUGUCAGGGCCA	hsa-miR-770-5p,UCC[A/G]GUACCACGUGUCAGGGCCA	352	18	1	1.2563
700	hsa-miR-493-5p	chr14	+	hsa-mir-493	Yes (100869074-100884771:8:hetero:hsa-mir-493/hsa-mir-337/hsa-mir-665/hsa-mir-431/hsa-mir-433/hsa-mir-127/hsa-mir-432/hsa-mir-136)	2	rs777387640	100869079	A > G	8e-06	5	UUGUACAUGGUAGGCUUUCAUU	UUGUGCAUGGUAGGCUUUCAUU	hsa-miR-493-5p,UUGU[A/G]CAUGGUAGGCUUUCAUU	1168	633	146	16.9797
700	hsa-miR-493-5p	chr14	+	hsa-mir-493	Yes (100869074-100884771:8:hetero:hsa-mir-493/hsa-mir-337/hsa-mir-665/hsa-mir-431/hsa-mir-433/hsa-mir-127/hsa-mir-432/hsa-mir-136)	2	rs746841197	100869082	T > C	1.7e-05	8	UUGUACAUGGUAGGCUUUCAUU	UUGUACACGGUAGGCUUUCAUU	hsa-miR-493-5p,UUGUACA[U/C]GGUAGGCUUUCAUU	1168	879	518	51.1227
701	hsa-miR-493-3p	chr14	+	hsa-mir-493	Yes (100869074-100884771:8:hetero:hsa-mir-493/hsa-mir-337/hsa-mir-665/hsa-mir-431/hsa-mir-433/hsa-mir-127/hsa-mir-432/hsa-mir-136)	2	rs773402656	100869119	A > C	8e-06	4	UGAAGGUCUACUGUGUGCCAGG	UGACGGUCUACUGUGUGCCAGG	hsa-miR-493-3p,UGA[A/C]GGUCUACUGUGUGCCAGG	410	24	0	0
701	hsa-miR-493-3p	chr14	+	hsa-mir-493	Yes (100869074-100884771:8:hetero:hsa-mir-493/hsa-mir-337/hsa-mir-665/hsa-mir-431/hsa-mir-433/hsa-mir-127/hsa-mir-432/hsa-mir-136)	2	rs761081504	100869121	G > T	8e-06	6	UGAAGGUCUACUGUGUGCCAGG	UGAAGUUCUACUGUGUGCCAGG	hsa-miR-493-3p,UGAAG[G/U]UCUACUGUGUGCCAGG	410	631	50	9.83022
702	hsa-miR-337-5p	chr14	+	hsa-mir-337	Yes (100869074-100884771:8:hetero:hsa-mir-493/hsa-mir-337/hsa-mir-665/hsa-mir-431/hsa-mir-433/hsa-mir-127/hsa-mir-432/hsa-mir-136)	1	rs373233398	100874521	C > T	4.8e-05	7	GAACGGCUUCAUACAGGAGUU	GAACGGUUUCAUACAGGAGUU	hsa-miR-337-5p,GAACGG[C/U]UUCAUACAGGAGUU	38	58	0	0
703	hsa-miR-337-3p	chr14	+	hsa-mir-337	Yes (100869074-100884771:8:hetero:hsa-mir-493/hsa-mir-337/hsa-mir-665/hsa-mir-431/hsa-mir-433/hsa-mir-127/hsa-mir-432/hsa-mir-136)	0
704	hsa-miR-665	chr14	+	hsa-mir-665	Yes (100869074-100884771:8:hetero:hsa-mir-493/hsa-mir-337/hsa-mir-665/hsa-mir-431/hsa-mir-433/hsa-mir-127/hsa-mir-432/hsa-mir-136)	1	rs747741348	100875077	C > T	8e-06	3	ACCAGGAGGCUGAGGCCCCU	ACUAGGAGGCUGAGGCCCCU	hsa-miR-665,AC[C/U]AGGAGGCUGAGGCCCCU	877	323	52	9.77017
705	hsa-miR-431-5p	chr14	+	hsa-mir-431	Yes (100869074-100884771:8:hetero:hsa-mir-493/hsa-mir-337/hsa-mir-665/hsa-mir-431/hsa-mir-433/hsa-mir-127/hsa-mir-432/hsa-mir-136)	0
706	hsa-miR-431-3p	chr14	+	hsa-mir-431	Yes (100869074-100884771:8:hetero:hsa-mir-493/hsa-mir-337/hsa-mir-665/hsa-mir-431/hsa-mir-433/hsa-mir-127/hsa-mir-432/hsa-mir-136)	2	rs775741559	100881074	C > T	3.9e-05	6	CAGGUCGUCUUGCAGGGCUUCU	CAGGUUGUCUUGCAGGGCUUCU	hsa-miR-431-3p,CAGGU[C/U]GUCUUGCAGGGCUUCU	13	290	0	0
706	hsa-miR-431-3p	chr14	+	hsa-mir-431	Yes (100869074-100884771:8:hetero:hsa-mir-493/hsa-mir-337/hsa-mir-665/hsa-mir-431/hsa-mir-433/hsa-mir-127/hsa-mir-432/hsa-mir-136)	2	rs763293911	100881075	G > A	2e-05	7	CAGGUCGUCUUGCAGGGCUUCU	CAGGUCAUCUUGCAGGGCUUCU	hsa-miR-431-3p,CAGGUC[G/A]UCUUGCAGGGCUUCU	13	436	0	0
707	hsa-miR-433-3p	chr14	+	hsa-mir-433	Yes (100869074-100884771:8:hetero:hsa-mir-493/hsa-mir-337/hsa-mir-665/hsa-mir-431/hsa-mir-433/hsa-mir-127/hsa-mir-432/hsa-mir-136)	1	rs757633556	100881956	T > A	8e-06	8	AUCAUGAUGGGCUCCUCGGUGU	AUCAUGAAGGGCUCCUCGGUGU	hsa-miR-433-3p,AUCAUGA[U/A]GGGCUCCUCGGUGU	698	902	331	41.7155
708	hsa-miR-433-5p	chr14	+	hsa-mir-433	Yes (100869074-100884771:8:hetero:hsa-mir-493/hsa-mir-337/hsa-mir-665/hsa-mir-431/hsa-mir-433/hsa-mir-127/hsa-mir-432/hsa-mir-136)	2	rs778114790	100881899	C > T	8e-06	3	UACGGUGAGCCUGUCAUUAUUC	UAUGGUGAGCCUGUCAUUAUUC	hsa-miR-433-5p,UA[C/U]GGUGAGCCUGUCAUUAUUC	42	447	9	6.56847
708	hsa-miR-433-5p	chr14	+	hsa-mir-433	Yes (100869074-100884771:8:hetero:hsa-mir-493/hsa-mir-337/hsa-mir-665/hsa-mir-431/hsa-mir-433/hsa-mir-127/hsa-mir-432/hsa-mir-136)	2	rs747305010	100881900	G > A	3.3e-05	4	UACGGUGAGCCUGUCAUUAUUC	UACAGUGAGCCUGUCAUUAUUC	hsa-miR-433-5p,UAC[G/A]GUGAGCCUGUCAUUAUUC	42	914	7	3.57273
709	hsa-miR-127-5p	chr14	+	hsa-mir-127	Yes (100869074-100884771:8:hetero:hsa-mir-493/hsa-mir-337/hsa-mir-665/hsa-mir-431/hsa-mir-433/hsa-mir-127/hsa-mir-432/hsa-mir-136)	0
710	hsa-miR-127-3p	chr14	+	hsa-mir-127	Yes (100869074-100884771:8:hetero:hsa-mir-493/hsa-mir-337/hsa-mir-665/hsa-mir-431/hsa-mir-433/hsa-mir-127/hsa-mir-432/hsa-mir-136)	1	rs779953498	100883037	G > A	8e-06	3	UCGGAUCCGUCUGAGCUUGGCU	UCAGAUCCGUCUGAGCUUGGCU	hsa-miR-127-3p,UC[G/A]GAUCCGUCUGAGCUUGGCU	25	339	0	0
711	hsa-miR-432-5p	chr14	+	hsa-mir-432	Yes (100869074-100884771:8:hetero:hsa-mir-493/hsa-mir-337/hsa-mir-665/hsa-mir-431/hsa-mir-433/hsa-mir-127/hsa-mir-432/hsa-mir-136)	1	rs757061476	100884503	G > A	8e-06	8	UCUUGGAGUAGGUCAUUGGGUGG	UCUUGGAAUAGGUCAUUGGGUGG	hsa-miR-432-5p,UCUUGGA[G/A]UAGGUCAUUGGGUGG	498	700	217	36.7533
712	hsa-miR-432-3p	chr14	+	hsa-mir-432	Yes (100869074-100884771:8:hetero:hsa-mir-493/hsa-mir-337/hsa-mir-665/hsa-mir-431/hsa-mir-433/hsa-mir-127/hsa-mir-432/hsa-mir-136)	1	rs201401049	100884550	G > C	0.001	7	CUGGAUGGCUCCUCCAUGUCU	CUGGAUCGCUCCUCCAUGUCU	hsa-miR-432-3p,CUGGAU[G/C]GCUCCUCCAUGUCU	357	73	7	4.33613
713	hsa-miR-136-5p	chr14	+	hsa-mir-136	Yes (100869074-100884771:8:hetero:hsa-mir-493/hsa-mir-337/hsa-mir-665/hsa-mir-431/hsa-mir-433/hsa-mir-127/hsa-mir-432/hsa-mir-136)	0
714	hsa-miR-136-3p	chr14	+	hsa-mir-136	Yes (100869074-100884771:8:hetero:hsa-mir-493/hsa-mir-337/hsa-mir-665/hsa-mir-431/hsa-mir-433/hsa-mir-127/hsa-mir-432/hsa-mir-136)	3	rs371763274	100884756	C > T	9e-06	7	CAUCAUCGUCUCAAAUGAGUCU	CAUCAUUGUCUCAAAUGAGUCU	hsa-miR-136-3p,CAUCAU[C/U]GUCUCAAAUGAGUCU	225	736	31	7.61783
714	hsa-miR-136-3p	chr14	+	hsa-mir-136	Yes (100869074-100884771:8:hetero:hsa-mir-493/hsa-mir-337/hsa-mir-665/hsa-mir-431/hsa-mir-433/hsa-mir-127/hsa-mir-432/hsa-mir-136)	3	rs147448304	100884751	A > C	1.7e-05	2	CAUCAUCGUCUCAAAUGAGUCU	CCUCAUCGUCUCAAAUGAGUCU	hsa-miR-136-3p,C[A/C]UCAUCGUCUCAAAUGAGUCU	225	161	10	5.25407
714	hsa-miR-136-3p	chr14	+	hsa-mir-136	Yes (100869074-100884771:8:hetero:hsa-mir-493/hsa-mir-337/hsa-mir-665/hsa-mir-431/hsa-mir-433/hsa-mir-127/hsa-mir-432/hsa-mir-136)	3	rs775059932	100884757	G > A	9e-06	8	CAUCAUCGUCUCAAAUGAGUCU	CAUCAUCAUCUCAAAUGAGUCU	hsa-miR-136-3p,CAUCAUC[G/A]UCUCAAAUGAGUCU	225	658	188	48.86
715	hsa-miR-370-3p	chr14	+	hsa-mir-370	No	1	rs751960148	100911188	C > T	1.7e-05	3	GCCUGCUGGGGUGGAACCUGGU	GCUUGCUGGGGUGGAACCUGGU	hsa-miR-370-3p,GC[C/U]UGCUGGGGUGGAACCUGGU	676	593	74	11.6878
716	hsa-miR-370-5p	chr14	+	hsa-mir-370	No	1	rs370330514	100911158	C > T	1.7e-05	8	CAGGUCACGUCUCUGCAGUUAC	CAGGUCAUGUCUCUGCAGUUAC	hsa-miR-370-5p,CAGGUCA[C/U]GUCUCUGCAGUUAC	401	436	166	39.7002
717	hsa-miR-379-5p	chr14	+	hsa-mir-379	Yes (101022070-101066786:42:HHC:hsa-mir-379/hsa-mir-411/hsa-mir-299/hsa-mir-380/hsa-mir-1197/hsa-mir-323a/hsa-mir-758/hsa-mir-329-1/hsa-mir-329-2/hsa-mir-494/hsa-mir-1193/hsa-mir-543/hsa-mir-495/hsa-mir-376c/hsa-mir-376a-2/hsa-mir-654/hsa-mir-376b/hsa-mir-376a-1/hsa-mir-300/hsa-mir-1185-1/hsa-mir-1185-2/hsa-mir-381/hsa-mir-487b/hsa-mir-539/hsa-mir-889/hsa-mir-544a/hsa-mir-655/hsa-mir-487a/hsa-mir…	2	rs61991156	101022077	A > G	0.5	7	UGGUAGACUAUGGAACGUAGG	UGGUAGGCUAUGGAACGUAGG	hsa-miR-379-5p,UGGUAG[A/G]CUAUGGAACGUAGG	203	202	10	4.93829
717	hsa-miR-379-5p	chr14	+	hsa-mir-379	Yes (101022070-101066786:42:HHC:hsa-mir-379/hsa-mir-411/hsa-mir-299/hsa-mir-380/hsa-mir-1197/hsa-mir-323a/hsa-mir-758/hsa-mir-329-1/hsa-mir-329-2/hsa-mir-494/hsa-mir-1193/hsa-mir-543/hsa-mir-495/hsa-mir-376c/hsa-mir-376a-2/hsa-mir-654/hsa-mir-376b/hsa-mir-376a-1/hsa-mir-300/hsa-mir-1185-1/hsa-mir-1185-2/hsa-mir-381/hsa-mir-487b/hsa-mir-539/hsa-mir-889/hsa-mir-544a/hsa-mir-655/hsa-mir-487a/hsa-mir…	2	rs775428399	101022073	G > A	8e-06	3	UGGUAGACUAUGGAACGUAGG	UGAUAGACUAUGGAACGUAGG	hsa-miR-379-5p,UG[G/A]UAGACUAUGGAACGUAGG	203	232	11	5.06875
718	hsa-miR-379-3p	chr14	+	hsa-mir-379	Yes (101022070-101066786:42:HHC:hsa-mir-379/hsa-mir-411/hsa-mir-299/hsa-mir-380/hsa-mir-1197/hsa-mir-323a/hsa-mir-758/hsa-mir-329-1/hsa-mir-329-2/hsa-mir-494/hsa-mir-1193/hsa-mir-543/hsa-mir-495/hsa-mir-376c/hsa-mir-376a-2/hsa-mir-654/hsa-mir-376b/hsa-mir-376a-1/hsa-mir-300/hsa-mir-1185-1/hsa-mir-1185-2/hsa-mir-381/hsa-mir-487b/hsa-mir-539/hsa-mir-889/hsa-mir-544a/hsa-mir-655/hsa-mir-487a/hsa-mir…	0
719	hsa-miR-411-5p	chr14	+	hsa-mir-411	Yes (101022070-101066786:42:HHC:hsa-mir-379/hsa-mir-411/hsa-mir-299/hsa-mir-380/hsa-mir-1197/hsa-mir-323a/hsa-mir-758/hsa-mir-329-1/hsa-mir-329-2/hsa-mir-494/hsa-mir-1193/hsa-mir-543/hsa-mir-495/hsa-mir-376c/hsa-mir-376a-2/hsa-mir-654/hsa-mir-376b/hsa-mir-376a-1/hsa-mir-300/hsa-mir-1185-1/hsa-mir-1185-2/hsa-mir-381/hsa-mir-487b/hsa-mir-539/hsa-mir-889/hsa-mir-544a/hsa-mir-655/hsa-mir-487a/hsa-mir…	1	rs753033941	101023343	T > C	8e-06	4	UAGUAGACCGUAUAGCGUACG	UAGCAGACCGUAUAGCGUACG	hsa-miR-411-5p,UAG[U/C]AGACCGUAUAGCGUACG	322	583	62	14.3097
720	hsa-miR-411-3p	chr14	+	hsa-mir-411	Yes (101022070-101066786:42:HHC:hsa-mir-379/hsa-mir-411/hsa-mir-299/hsa-mir-380/hsa-mir-1197/hsa-mir-323a/hsa-mir-758/hsa-mir-329-1/hsa-mir-329-2/hsa-mir-494/hsa-mir-1193/hsa-mir-543/hsa-mir-495/hsa-mir-376c/hsa-mir-376a-2/hsa-mir-654/hsa-mir-376b/hsa-mir-376a-1/hsa-mir-300/hsa-mir-1185-1/hsa-mir-1185-2/hsa-mir-381/hsa-mir-487b/hsa-mir-539/hsa-mir-889/hsa-mir-544a/hsa-mir-655/hsa-mir-487a/hsa-mir…	1	rs111835650	101023377	T > C	0.5	3	UAUGUAACACGGUCCACUAACC	UACGUAACACGGUCCACUAACC	hsa-miR-411-3p,UA[U/C]GUAACACGGUCCACUAACC	1031	83	20	6.83694
721	hsa-miR-299-5p	chr14	+	hsa-mir-299	Yes (101022070-101066786:42:HHC:hsa-mir-379/hsa-mir-411/hsa-mir-299/hsa-mir-380/hsa-mir-1197/hsa-mir-323a/hsa-mir-758/hsa-mir-329-1/hsa-mir-329-2/hsa-mir-494/hsa-mir-1193/hsa-mir-543/hsa-mir-495/hsa-mir-376c/hsa-mir-376a-2/hsa-mir-654/hsa-mir-376b/hsa-mir-376a-1/hsa-mir-300/hsa-mir-1185-1/hsa-mir-1185-2/hsa-mir-381/hsa-mir-487b/hsa-mir-539/hsa-mir-889/hsa-mir-544a/hsa-mir-655/hsa-mir-487a/hsa-mir…	0
722	hsa-miR-299-3p	chr14	+	hsa-mir-299	Yes (101022070-101066786:42:HHC:hsa-mir-379/hsa-mir-411/hsa-mir-299/hsa-mir-380/hsa-mir-1197/hsa-mir-323a/hsa-mir-758/hsa-mir-329-1/hsa-mir-329-2/hsa-mir-494/hsa-mir-1193/hsa-mir-543/hsa-mir-495/hsa-mir-376c/hsa-mir-376a-2/hsa-mir-654/hsa-mir-376b/hsa-mir-376a-1/hsa-mir-300/hsa-mir-1185-1/hsa-mir-1185-2/hsa-mir-381/hsa-mir-487b/hsa-mir-539/hsa-mir-889/hsa-mir-544a/hsa-mir-655/hsa-mir-487a/hsa-mir…	1	rs768725045	101023835	G > T	8e-06	4	UAUGUGGGAUGGUAAACCGCUU	UAUUUGGGAUGGUAAACCGCUU	hsa-miR-299-3p,UAU[G/U]UGGGAUGGUAAACCGCUU	395	792	53	9.47577
723	hsa-miR-380-5p	chr14	+	hsa-mir-380	Yes (101022070-101066786:42:HHC:hsa-mir-379/hsa-mir-411/hsa-mir-299/hsa-mir-380/hsa-mir-1197/hsa-mir-323a/hsa-mir-758/hsa-mir-329-1/hsa-mir-329-2/hsa-mir-494/hsa-mir-1193/hsa-mir-543/hsa-mir-495/hsa-mir-376c/hsa-mir-376a-2/hsa-mir-654/hsa-mir-376b/hsa-mir-376a-1/hsa-mir-300/hsa-mir-1185-1/hsa-mir-1185-2/hsa-mir-381/hsa-mir-487b/hsa-mir-539/hsa-mir-889/hsa-mir-544a/hsa-mir-655/hsa-mir-487a/hsa-mir…	0
724	hsa-miR-380-3p	chr14	+	hsa-mir-380	Yes (101022070-101066786:42:HHC:hsa-mir-379/hsa-mir-411/hsa-mir-299/hsa-mir-380/hsa-mir-1197/hsa-mir-323a/hsa-mir-758/hsa-mir-329-1/hsa-mir-329-2/hsa-mir-494/hsa-mir-1193/hsa-mir-543/hsa-mir-495/hsa-mir-376c/hsa-mir-376a-2/hsa-mir-654/hsa-mir-376b/hsa-mir-376a-1/hsa-mir-300/hsa-mir-1185-1/hsa-mir-1185-2/hsa-mir-381/hsa-mir-487b/hsa-mir-539/hsa-mir-889/hsa-mir-544a/hsa-mir-655/hsa-mir-487a/hsa-mir…	0
725	hsa-miR-1197	chr14	+	hsa-mir-1197	Yes (101022070-101066786:42:HHC:hsa-mir-379/hsa-mir-411/hsa-mir-299/hsa-mir-380/hsa-mir-1197/hsa-mir-323a/hsa-mir-758/hsa-mir-329-1/hsa-mir-329-2/hsa-mir-494/hsa-mir-1193/hsa-mir-543/hsa-mir-495/hsa-mir-376c/hsa-mir-376a-2/hsa-mir-654/hsa-mir-376b/hsa-mir-376a-1/hsa-mir-300/hsa-mir-1185-1/hsa-mir-1185-2/hsa-mir-381/hsa-mir-487b/hsa-mir-539/hsa-mir-889/hsa-mir-544a/hsa-mir-655/hsa-mir-487a/hsa-mir…	1	rs768095977	101025627	C > T	8e-06	8	UAGGACACAUGGUCUACUUCU	UAGGACAUAUGGUCUACUUCU	hsa-miR-1197,UAGGACA[C/U]AUGGUCUACUUCU	631	573	274	45.5679
726	hsa-miR-323a-5p	chr14	+	hsa-mir-323a	Yes (101022070-101066786:42:HHC:hsa-mir-379/hsa-mir-411/hsa-mir-299/hsa-mir-380/hsa-mir-1197/hsa-mir-323a/hsa-mir-758/hsa-mir-329-1/hsa-mir-329-2/hsa-mir-494/hsa-mir-1193/hsa-mir-543/hsa-mir-495/hsa-mir-376c/hsa-mir-376a-2/hsa-mir-654/hsa-mir-376b/hsa-mir-376a-1/hsa-mir-300/hsa-mir-1185-1/hsa-mir-1185-2/hsa-mir-381/hsa-mir-487b/hsa-mir-539/hsa-mir-889/hsa-mir-544a/hsa-mir-655/hsa-mir-487a/hsa-mir…	0
727	hsa-miR-323a-3p	chr14	+	hsa-mir-323a	Yes (101022070-101066786:42:HHC:hsa-mir-379/hsa-mir-411/hsa-mir-299/hsa-mir-380/hsa-mir-1197/hsa-mir-323a/hsa-mir-758/hsa-mir-329-1/hsa-mir-329-2/hsa-mir-494/hsa-mir-1193/hsa-mir-543/hsa-mir-495/hsa-mir-376c/hsa-mir-376a-2/hsa-mir-654/hsa-mir-376b/hsa-mir-376a-1/hsa-mir-300/hsa-mir-1185-1/hsa-mir-1185-2/hsa-mir-381/hsa-mir-487b/hsa-mir-539/hsa-mir-889/hsa-mir-544a/hsa-mir-655/hsa-mir-487a/hsa-mir…	1	rs376870645	101025783	A > C	6.6e-05	2	CACAUUACACGGUCGACCUCU	CCCAUUACACGGUCGACCUCU	hsa-miR-323a-3p,C[A/C]CAUUACACGGUCGACCUCU	1161	517	149	19.232
728	hsa-miR-758-3p	chr14	+	hsa-mir-758	Yes (101022070-101066786:42:HHC:hsa-mir-379/hsa-mir-411/hsa-mir-299/hsa-mir-380/hsa-mir-1197/hsa-mir-323a/hsa-mir-758/hsa-mir-329-1/hsa-mir-329-2/hsa-mir-494/hsa-mir-1193/hsa-mir-543/hsa-mir-495/hsa-mir-376c/hsa-mir-376a-2/hsa-mir-654/hsa-mir-376b/hsa-mir-376a-1/hsa-mir-300/hsa-mir-1185-1/hsa-mir-1185-2/hsa-mir-381/hsa-mir-487b/hsa-mir-539/hsa-mir-889/hsa-mir-544a/hsa-mir-655/hsa-mir-487a/hsa-mir…	0
729	hsa-miR-758-5p	chr14	+	hsa-mir-758	Yes (101022070-101066786:42:HHC:hsa-mir-379/hsa-mir-411/hsa-mir-299/hsa-mir-380/hsa-mir-1197/hsa-mir-323a/hsa-mir-758/hsa-mir-329-1/hsa-mir-329-2/hsa-mir-494/hsa-mir-1193/hsa-mir-543/hsa-mir-495/hsa-mir-376c/hsa-mir-376a-2/hsa-mir-654/hsa-mir-376b/hsa-mir-376a-1/hsa-mir-300/hsa-mir-1185-1/hsa-mir-1185-2/hsa-mir-381/hsa-mir-487b/hsa-mir-539/hsa-mir-889/hsa-mir-544a/hsa-mir-655/hsa-mir-487a/hsa-mir…	1	rs748092616	101026035	A > G	8e-06	2	GAUGGUUGACCAGAGAGCACAC	GGUGGUUGACCAGAGAGCACAC	hsa-miR-758-5p,G[A/G]UGGUUGACCAGAGAGCACAC	370	404	31	8.01808
730	hsa-miR-329-3p	chr14	+	hsa-mir-329-1	Yes (101022070-101066786:42:HHC:hsa-mir-379/hsa-mir-411/hsa-mir-299/hsa-mir-380/hsa-mir-1197/hsa-mir-323a/hsa-mir-758/hsa-mir-329-1/hsa-mir-329-2/hsa-mir-494/hsa-mir-1193/hsa-mir-543/hsa-mir-495/hsa-mir-376c/hsa-mir-376a-2/hsa-mir-654/hsa-mir-376b/hsa-mir-376a-1/hsa-mir-300/hsa-mir-1185-1/hsa-mir-1185-2/hsa-mir-381/hsa-mir-487b/hsa-mir-539/hsa-mir-889/hsa-mir-544a/hsa-mir-655/hsa-mir-487a/hsa-mir…	0
731	hsa-miR-329-5p	chr14	+	hsa-mir-329-1	Yes (101022070-101066786:42:HHC:hsa-mir-379/hsa-mir-411/hsa-mir-299/hsa-mir-380/hsa-mir-1197/hsa-mir-323a/hsa-mir-758/hsa-mir-329-1/hsa-mir-329-2/hsa-mir-494/hsa-mir-1193/hsa-mir-543/hsa-mir-495/hsa-mir-376c/hsa-mir-376a-2/hsa-mir-654/hsa-mir-376b/hsa-mir-376a-1/hsa-mir-300/hsa-mir-1185-1/hsa-mir-1185-2/hsa-mir-381/hsa-mir-487b/hsa-mir-539/hsa-mir-889/hsa-mir-544a/hsa-mir-655/hsa-mir-487a/hsa-mir…	1	rs765828605	101026804	T > C	8e-06	8	GAGGUUUUCUGGGUUUCUGUUUC	GAGGUUUCCUGGGUUUCUGUUUC	hsa-miR-329-5p,GAGGUUU[U/C]CUGGGUUUCUGUUUC	940	724	352	42.6687
732	hsa-miR-329-3p	chr14	+	hsa-mir-329-2	Yes (101022070-101066786:42:HHC:hsa-mir-379/hsa-mir-411/hsa-mir-299/hsa-mir-380/hsa-mir-1197/hsa-mir-323a/hsa-mir-758/hsa-mir-329-1/hsa-mir-329-2/hsa-mir-494/hsa-mir-1193/hsa-mir-543/hsa-mir-495/hsa-mir-376c/hsa-mir-376a-2/hsa-mir-654/hsa-mir-376b/hsa-mir-376a-1/hsa-mir-300/hsa-mir-1185-1/hsa-mir-1185-2/hsa-mir-381/hsa-mir-487b/hsa-mir-539/hsa-mir-889/hsa-mir-544a/hsa-mir-655/hsa-mir-487a/hsa-mir…	2	rs763867095	101027157	C > G	8e-06	7	AACACACCUGGUUAACCUCUUU	AACACAGCUGGUUAACCUCUUU	hsa-miR-329-3p,AACACA[C/G]CUGGUUAACCUCUUU	1290	1248	346	27.2693
732	hsa-miR-329-3p	chr14	+	hsa-mir-329-2	Yes (101022070-101066786:42:HHC:hsa-mir-379/hsa-mir-411/hsa-mir-299/hsa-mir-380/hsa-mir-1197/hsa-mir-323a/hsa-mir-758/hsa-mir-329-1/hsa-mir-329-2/hsa-mir-494/hsa-mir-1193/hsa-mir-543/hsa-mir-495/hsa-mir-376c/hsa-mir-376a-2/hsa-mir-654/hsa-mir-376b/hsa-mir-376a-1/hsa-mir-300/hsa-mir-1185-1/hsa-mir-1185-2/hsa-mir-381/hsa-mir-487b/hsa-mir-539/hsa-mir-889/hsa-mir-544a/hsa-mir-655/hsa-mir-487a/hsa-mir…	2	rs762603030	101027156	A > G	8e-06	6	AACACACCUGGUUAACCUCUUU	AACACGCCUGGUUAACCUCUUU	hsa-miR-329-3p,AACAC[A/G]CCUGGUUAACCUCUUU	1290	58	25	9.13968
733	hsa-miR-329-5p	chr14	+	hsa-mir-329-2	Yes (101022070-101066786:42:HHC:hsa-mir-379/hsa-mir-411/hsa-mir-299/hsa-mir-380/hsa-mir-1197/hsa-mir-323a/hsa-mir-758/hsa-mir-329-1/hsa-mir-329-2/hsa-mir-494/hsa-mir-1193/hsa-mir-543/hsa-mir-495/hsa-mir-376c/hsa-mir-376a-2/hsa-mir-654/hsa-mir-376b/hsa-mir-376a-1/hsa-mir-300/hsa-mir-1185-1/hsa-mir-1185-2/hsa-mir-381/hsa-mir-487b/hsa-mir-539/hsa-mir-889/hsa-mir-544a/hsa-mir-655/hsa-mir-487a/hsa-mir…	0
734	hsa-miR-494-3p	chr14	+	hsa-mir-494	Yes (101022070-101066786:42:HHC:hsa-mir-379/hsa-mir-411/hsa-mir-299/hsa-mir-380/hsa-mir-1197/hsa-mir-323a/hsa-mir-758/hsa-mir-329-1/hsa-mir-329-2/hsa-mir-494/hsa-mir-1193/hsa-mir-543/hsa-mir-495/hsa-mir-376c/hsa-mir-376a-2/hsa-mir-654/hsa-mir-376b/hsa-mir-376a-1/hsa-mir-300/hsa-mir-1185-1/hsa-mir-1185-2/hsa-mir-381/hsa-mir-487b/hsa-mir-539/hsa-mir-889/hsa-mir-544a/hsa-mir-655/hsa-mir-487a/hsa-mir…	0
735	hsa-miR-494-5p	chr14	+	hsa-mir-494	Yes (101022070-101066786:42:HHC:hsa-mir-379/hsa-mir-411/hsa-mir-299/hsa-mir-380/hsa-mir-1197/hsa-mir-323a/hsa-mir-758/hsa-mir-329-1/hsa-mir-329-2/hsa-mir-494/hsa-mir-1193/hsa-mir-543/hsa-mir-495/hsa-mir-376c/hsa-mir-376a-2/hsa-mir-654/hsa-mir-376b/hsa-mir-376a-1/hsa-mir-300/hsa-mir-1185-1/hsa-mir-1185-2/hsa-mir-381/hsa-mir-487b/hsa-mir-539/hsa-mir-889/hsa-mir-544a/hsa-mir-655/hsa-mir-487a/hsa-mir…	0
736	hsa-miR-1193	chr14	+	hsa-mir-1193	Yes (101022070-101066786:42:HHC:hsa-mir-379/hsa-mir-411/hsa-mir-299/hsa-mir-380/hsa-mir-1197/hsa-mir-323a/hsa-mir-758/hsa-mir-329-1/hsa-mir-329-2/hsa-mir-494/hsa-mir-1193/hsa-mir-543/hsa-mir-495/hsa-mir-376c/hsa-mir-376a-2/hsa-mir-654/hsa-mir-376b/hsa-mir-376a-1/hsa-mir-300/hsa-mir-1185-1/hsa-mir-1185-2/hsa-mir-381/hsa-mir-487b/hsa-mir-539/hsa-mir-889/hsa-mir-544a/hsa-mir-655/hsa-mir-487a/hsa-mir…	0
737	hsa-miR-543	chr14	+	hsa-mir-543	Yes (101022070-101066786:42:HHC:hsa-mir-379/hsa-mir-411/hsa-mir-299/hsa-mir-380/hsa-mir-1197/hsa-mir-323a/hsa-mir-758/hsa-mir-329-1/hsa-mir-329-2/hsa-mir-494/hsa-mir-1193/hsa-mir-543/hsa-mir-495/hsa-mir-376c/hsa-mir-376a-2/hsa-mir-654/hsa-mir-376b/hsa-mir-376a-1/hsa-mir-300/hsa-mir-1185-1/hsa-mir-1185-2/hsa-mir-381/hsa-mir-487b/hsa-mir-539/hsa-mir-889/hsa-mir-544a/hsa-mir-655/hsa-mir-487a/hsa-mir…	1	rs772064768	101032040	C > T	2.5e-05	8	AAACAUUCGCGGUGCACUUCUU	AAACAUUUGCGGUGCACUUCUU	hsa-miR-543,AAACAUU[C/U]GCGGUGCACUUCUU	1692	2423	1221	60.303
738	hsa-miR-495-3p	chr14	+	hsa-mir-495	Yes (101022070-101066786:42:HHC:hsa-mir-379/hsa-mir-411/hsa-mir-299/hsa-mir-380/hsa-mir-1197/hsa-mir-323a/hsa-mir-758/hsa-mir-329-1/hsa-mir-329-2/hsa-mir-494/hsa-mir-1193/hsa-mir-543/hsa-mir-495/hsa-mir-376c/hsa-mir-376a-2/hsa-mir-654/hsa-mir-376b/hsa-mir-376a-1/hsa-mir-300/hsa-mir-1185-1/hsa-mir-1185-2/hsa-mir-381/hsa-mir-487b/hsa-mir-539/hsa-mir-889/hsa-mir-544a/hsa-mir-655/hsa-mir-487a/hsa-mir…	1	rs761362302	101033811	C > T	2.8e-05	8	AAACAAACAUGGUGCACUUCUU	AAACAAAUAUGGUGCACUUCUU	hsa-miR-495-3p,AAACAAA[C/U]AUGGUGCACUUCUU	2677	2797	2062	75.3561
739	hsa-miR-495-5p	chr14	+	hsa-mir-495	Yes (101022070-101066786:42:HHC:hsa-mir-379/hsa-mir-411/hsa-mir-299/hsa-mir-380/hsa-mir-1197/hsa-mir-323a/hsa-mir-758/hsa-mir-329-1/hsa-mir-329-2/hsa-mir-494/hsa-mir-1193/hsa-mir-543/hsa-mir-495/hsa-mir-376c/hsa-mir-376a-2/hsa-mir-654/hsa-mir-376b/hsa-mir-376a-1/hsa-mir-300/hsa-mir-1185-1/hsa-mir-1185-2/hsa-mir-381/hsa-mir-487b/hsa-mir-539/hsa-mir-889/hsa-mir-544a/hsa-mir-655/hsa-mir-487a/hsa-mir…	2	rs374356706	101033775	C > T	7.8e-05	8	GAAGUUGCCCAUGUUAUUUUCG	GAAGUUGUCCAUGUUAUUUUCG	hsa-miR-495-5p,GAAGUUG[C/U]CCAUGUUAUUUUCG	490	616	202	36.7674
739	hsa-miR-495-5p	chr14	+	hsa-mir-495	Yes (101022070-101066786:42:HHC:hsa-mir-379/hsa-mir-411/hsa-mir-299/hsa-mir-380/hsa-mir-1197/hsa-mir-323a/hsa-mir-758/hsa-mir-329-1/hsa-mir-329-2/hsa-mir-494/hsa-mir-1193/hsa-mir-543/hsa-mir-495/hsa-mir-376c/hsa-mir-376a-2/hsa-mir-654/hsa-mir-376b/hsa-mir-376a-1/hsa-mir-300/hsa-mir-1185-1/hsa-mir-1185-2/hsa-mir-381/hsa-mir-487b/hsa-mir-539/hsa-mir-889/hsa-mir-544a/hsa-mir-655/hsa-mir-487a/hsa-mir…	2	rs778897748	101033771	G > A	1.7e-05	4	GAAGUUGCCCAUGUUAUUUUCG	GAAAUUGCCCAUGUUAUUUUCG	hsa-miR-495-5p,GAA[G/A]UUGCCCAUGUUAUUUUCG	490	990	116	16.6549
740	hsa-miR-376c-3p	chr14	+	hsa-mir-376c	Yes (101022070-101066786:42:HHC:hsa-mir-379/hsa-mir-411/hsa-mir-299/hsa-mir-380/hsa-mir-1197/hsa-mir-323a/hsa-mir-758/hsa-mir-329-1/hsa-mir-329-2/hsa-mir-494/hsa-mir-1193/hsa-mir-543/hsa-mir-495/hsa-mir-376c/hsa-mir-376a-2/hsa-mir-654/hsa-mir-376b/hsa-mir-376a-1/hsa-mir-300/hsa-mir-1185-1/hsa-mir-1185-2/hsa-mir-381/hsa-mir-487b/hsa-mir-539/hsa-mir-889/hsa-mir-544a/hsa-mir-655/hsa-mir-487a/hsa-mir…	0
741	hsa-miR-376c-5p	chr14	+	hsa-mir-376c	Yes (101022070-101066786:42:HHC:hsa-mir-379/hsa-mir-411/hsa-mir-299/hsa-mir-380/hsa-mir-1197/hsa-mir-323a/hsa-mir-758/hsa-mir-329-1/hsa-mir-329-2/hsa-mir-494/hsa-mir-1193/hsa-mir-543/hsa-mir-495/hsa-mir-376c/hsa-mir-376a-2/hsa-mir-654/hsa-mir-376b/hsa-mir-376a-1/hsa-mir-300/hsa-mir-1185-1/hsa-mir-1185-2/hsa-mir-381/hsa-mir-487b/hsa-mir-539/hsa-mir-889/hsa-mir-544a/hsa-mir-655/hsa-mir-487a/hsa-mir…	0
742	hsa-miR-376a-3p	chr14	+	hsa-mir-376a-2	Yes (101022070-101066786:42:HHC:hsa-mir-379/hsa-mir-411/hsa-mir-299/hsa-mir-380/hsa-mir-1197/hsa-mir-323a/hsa-mir-758/hsa-mir-329-1/hsa-mir-329-2/hsa-mir-494/hsa-mir-1193/hsa-mir-543/hsa-mir-495/hsa-mir-376c/hsa-mir-376a-2/hsa-mir-654/hsa-mir-376b/hsa-mir-376a-1/hsa-mir-300/hsa-mir-1185-1/hsa-mir-1185-2/hsa-mir-381/hsa-mir-487b/hsa-mir-539/hsa-mir-889/hsa-mir-544a/hsa-mir-655/hsa-mir-487a/hsa-mir…	1	rs370241280	101040123	A > T	9.7e-05	6	AUCAUAGAGGAAAAUCCACGU	AUCAUUGAGGAAAAUCCACGU	hsa-miR-376a-3p,AUCAU[A/U]GAGGAAAAUCCACGU	613	603	67	11.0201
743	hsa-miR-376a-2-5p	chr14	+	hsa-mir-376a-2	Yes (101022070-101066786:42:HHC:hsa-mir-379/hsa-mir-411/hsa-mir-299/hsa-mir-380/hsa-mir-1197/hsa-mir-323a/hsa-mir-758/hsa-mir-329-1/hsa-mir-329-2/hsa-mir-494/hsa-mir-1193/hsa-mir-543/hsa-mir-495/hsa-mir-376c/hsa-mir-376a-2/hsa-mir-654/hsa-mir-376b/hsa-mir-376a-1/hsa-mir-300/hsa-mir-1185-1/hsa-mir-1185-2/hsa-mir-381/hsa-mir-487b/hsa-mir-539/hsa-mir-889/hsa-mir-544a/hsa-mir-655/hsa-mir-487a/hsa-mir…	0
744	hsa-miR-654-5p	chr14	+	hsa-mir-654	Yes (101022070-101066786:42:HHC:hsa-mir-379/hsa-mir-411/hsa-mir-299/hsa-mir-380/hsa-mir-1197/hsa-mir-323a/hsa-mir-758/hsa-mir-329-1/hsa-mir-329-2/hsa-mir-494/hsa-mir-1193/hsa-mir-543/hsa-mir-495/hsa-mir-376c/hsa-mir-376a-2/hsa-mir-654/hsa-mir-376b/hsa-mir-376a-1/hsa-mir-300/hsa-mir-1185-1/hsa-mir-1185-2/hsa-mir-381/hsa-mir-487b/hsa-mir-539/hsa-mir-889/hsa-mir-544a/hsa-mir-655/hsa-mir-487a/hsa-mir…	1	rs533933068	101040240	G > A	4e-05	7	UGGUGGGCCGCAGAACAUGUGC	UGGUGGACCGCAGAACAUGUGC	hsa-miR-654-5p,UGGUGG[G/A]CCGCAGAACAUGUGC	883	344	72	13.0639
745	hsa-miR-654-3p	chr14	+	hsa-mir-654	Yes (101022070-101066786:42:HHC:hsa-mir-379/hsa-mir-411/hsa-mir-299/hsa-mir-380/hsa-mir-1197/hsa-mir-323a/hsa-mir-758/hsa-mir-329-1/hsa-mir-329-2/hsa-mir-494/hsa-mir-1193/hsa-mir-543/hsa-mir-495/hsa-mir-376c/hsa-mir-376a-2/hsa-mir-654/hsa-mir-376b/hsa-mir-376a-1/hsa-mir-300/hsa-mir-1185-1/hsa-mir-1185-2/hsa-mir-381/hsa-mir-487b/hsa-mir-539/hsa-mir-889/hsa-mir-544a/hsa-mir-655/hsa-mir-487a/hsa-mir…	2	rs371699284	101040271	T > C	6.7e-05	3	UAUGUCUGCUGACCAUCACCUU	UACGUCUGCUGACCAUCACCUU	hsa-miR-654-3p,UA[U/C]GUCUGCUGACCAUCACCUU	582	59	8	4.3172
745	hsa-miR-654-3p	chr14	+	hsa-mir-654	Yes (101022070-101066786:42:HHC:hsa-mir-379/hsa-mir-411/hsa-mir-299/hsa-mir-380/hsa-mir-1197/hsa-mir-323a/hsa-mir-758/hsa-mir-329-1/hsa-mir-329-2/hsa-mir-494/hsa-mir-1193/hsa-mir-543/hsa-mir-495/hsa-mir-376c/hsa-mir-376a-2/hsa-mir-654/hsa-mir-376b/hsa-mir-376a-1/hsa-mir-300/hsa-mir-1185-1/hsa-mir-1185-2/hsa-mir-381/hsa-mir-487b/hsa-mir-539/hsa-mir-889/hsa-mir-544a/hsa-mir-655/hsa-mir-487a/hsa-mir…	2	rs764342883	101040276	G > A	8e-06	8	UAUGUCUGCUGACCAUCACCUU	UAUGUCUACUGACCAUCACCUU	hsa-miR-654-3p,UAUGUCU[G/A]CUGACCAUCACCUU	582	535	248	44.444
746	hsa-miR-376b-3p	chr14	+	hsa-mir-376b	Yes (101022070-101066786:42:HHC:hsa-mir-379/hsa-mir-411/hsa-mir-299/hsa-mir-380/hsa-mir-1197/hsa-mir-323a/hsa-mir-758/hsa-mir-329-1/hsa-mir-329-2/hsa-mir-494/hsa-mir-1193/hsa-mir-543/hsa-mir-495/hsa-mir-376c/hsa-mir-376a-2/hsa-mir-654/hsa-mir-376b/hsa-mir-376a-1/hsa-mir-300/hsa-mir-1185-1/hsa-mir-1185-2/hsa-mir-381/hsa-mir-487b/hsa-mir-539/hsa-mir-889/hsa-mir-544a/hsa-mir-655/hsa-mir-487a/hsa-mir…	3	rs376094470	101040501	T > C	9.7e-05	5	AUCAUAGAGGAAAAUCCAUGUU	AUCACAGAGGAAAAUCCAUGUU	hsa-miR-376b-3p,AUCA[U/C]AGAGGAAAAUCCAUGUU	613	1235	118	13.5618
746	hsa-miR-376b-3p	chr14	+	hsa-mir-376b	Yes (101022070-101066786:42:HHC:hsa-mir-379/hsa-mir-411/hsa-mir-299/hsa-mir-380/hsa-mir-1197/hsa-mir-323a/hsa-mir-758/hsa-mir-329-1/hsa-mir-329-2/hsa-mir-494/hsa-mir-1193/hsa-mir-543/hsa-mir-495/hsa-mir-376c/hsa-mir-376a-2/hsa-mir-654/hsa-mir-376b/hsa-mir-376a-1/hsa-mir-300/hsa-mir-1185-1/hsa-mir-1185-2/hsa-mir-381/hsa-mir-487b/hsa-mir-539/hsa-mir-889/hsa-mir-544a/hsa-mir-655/hsa-mir-487a/hsa-mir…	3	rs767876987	101040500	A > T	1.1e-05	4	AUCAUAGAGGAAAAUCCAUGUU	AUCUUAGAGGAAAAUCCAUGUU	hsa-miR-376b-3p,AUC[A/U]UAGAGGAAAAUCCAUGUU	613	697	90	13.7688
746	hsa-miR-376b-3p	chr14	+	hsa-mir-376b	Yes (101022070-101066786:42:HHC:hsa-mir-379/hsa-mir-411/hsa-mir-299/hsa-mir-380/hsa-mir-1197/hsa-mir-323a/hsa-mir-758/hsa-mir-329-1/hsa-mir-329-2/hsa-mir-494/hsa-mir-1193/hsa-mir-543/hsa-mir-495/hsa-mir-376c/hsa-mir-376a-2/hsa-mir-654/hsa-mir-376b/hsa-mir-376a-1/hsa-mir-300/hsa-mir-1185-1/hsa-mir-1185-2/hsa-mir-381/hsa-mir-487b/hsa-mir-539/hsa-mir-889/hsa-mir-544a/hsa-mir-655/hsa-mir-487a/hsa-mir…	3	rs762103583	101040498	T > C	8e-06	2	AUCAUAGAGGAAAAUCCAUGUU	ACCAUAGAGGAAAAUCCAUGUU	hsa-miR-376b-3p,A[U/C]CAUAGAGGAAAAUCCAUGUU	613	345	32	6.95841
747	hsa-miR-376b-5p	chr14	+	hsa-mir-376b	Yes (101022070-101066786:42:HHC:hsa-mir-379/hsa-mir-411/hsa-mir-299/hsa-mir-380/hsa-mir-1197/hsa-mir-323a/hsa-mir-758/hsa-mir-329-1/hsa-mir-329-2/hsa-mir-494/hsa-mir-1193/hsa-mir-543/hsa-mir-495/hsa-mir-376c/hsa-mir-376a-2/hsa-mir-654/hsa-mir-376b/hsa-mir-376a-1/hsa-mir-300/hsa-mir-1185-1/hsa-mir-1185-2/hsa-mir-381/hsa-mir-487b/hsa-mir-539/hsa-mir-889/hsa-mir-544a/hsa-mir-655/hsa-mir-487a/hsa-mir…	0
748	hsa-miR-376a-5p	chr14	+	hsa-mir-376a-1	Yes (101022070-101066786:42:HHC:hsa-mir-379/hsa-mir-411/hsa-mir-299/hsa-mir-380/hsa-mir-1197/hsa-mir-323a/hsa-mir-758/hsa-mir-329-1/hsa-mir-329-2/hsa-mir-494/hsa-mir-1193/hsa-mir-543/hsa-mir-495/hsa-mir-376c/hsa-mir-376a-2/hsa-mir-654/hsa-mir-376b/hsa-mir-376a-1/hsa-mir-300/hsa-mir-1185-1/hsa-mir-1185-2/hsa-mir-381/hsa-mir-487b/hsa-mir-539/hsa-mir-889/hsa-mir-544a/hsa-mir-655/hsa-mir-487a/hsa-mir…	0
749	hsa-miR-376a-3p	chr14	+	hsa-mir-376a-1	Yes (101022070-101066786:42:HHC:hsa-mir-379/hsa-mir-411/hsa-mir-299/hsa-mir-380/hsa-mir-1197/hsa-mir-323a/hsa-mir-758/hsa-mir-329-1/hsa-mir-329-2/hsa-mir-494/hsa-mir-1193/hsa-mir-543/hsa-mir-495/hsa-mir-376c/hsa-mir-376a-2/hsa-mir-654/hsa-mir-376b/hsa-mir-376a-1/hsa-mir-300/hsa-mir-1185-1/hsa-mir-1185-2/hsa-mir-381/hsa-mir-487b/hsa-mir-539/hsa-mir-889/hsa-mir-544a/hsa-mir-655/hsa-mir-487a/hsa-mir…	0
750	hsa-miR-300	chr14	+	hsa-mir-300	Yes (101022070-101066786:42:HHC:hsa-mir-379/hsa-mir-411/hsa-mir-299/hsa-mir-380/hsa-mir-1197/hsa-mir-323a/hsa-mir-758/hsa-mir-329-1/hsa-mir-329-2/hsa-mir-494/hsa-mir-1193/hsa-mir-543/hsa-mir-495/hsa-mir-376c/hsa-mir-376a-2/hsa-mir-654/hsa-mir-376b/hsa-mir-376a-1/hsa-mir-300/hsa-mir-1185-1/hsa-mir-1185-2/hsa-mir-381/hsa-mir-487b/hsa-mir-539/hsa-mir-889/hsa-mir-544a/hsa-mir-655/hsa-mir-487a/hsa-mir…	2	rs771323440	101041418	C > T	8e-06	5	UAUACAAGGGCAGACUCUCUCU	UAUAUAAGGGCAGACUCUCUCU	hsa-miR-300,UAUA[C/U]AAGGGCAGACUCUCUCU	1590	1641	572	35.4114
750	hsa-miR-300	chr14	+	hsa-mir-300	Yes (101022070-101066786:42:HHC:hsa-mir-379/hsa-mir-411/hsa-mir-299/hsa-mir-380/hsa-mir-1197/hsa-mir-323a/hsa-mir-758/hsa-mir-329-1/hsa-mir-329-2/hsa-mir-494/hsa-mir-1193/hsa-mir-543/hsa-mir-495/hsa-mir-376c/hsa-mir-376a-2/hsa-mir-654/hsa-mir-376b/hsa-mir-376a-1/hsa-mir-300/hsa-mir-1185-1/hsa-mir-1185-2/hsa-mir-381/hsa-mir-487b/hsa-mir-539/hsa-mir-889/hsa-mir-544a/hsa-mir-655/hsa-mir-487a/hsa-mir…	2	rs780443253	101041417	A > G	1.7e-05	4	UAUACAAGGGCAGACUCUCUCU	UAUGCAAGGGCAGACUCUCUCU	hsa-miR-300,UAU[A/G]CAAGGGCAGACUCUCUCU	1590	707	255	24.0509
751	hsa-miR-1185-5p	chr14	+	hsa-mir-1185-1	Yes (101022070-101066786:42:HHC:hsa-mir-379/hsa-mir-411/hsa-mir-299/hsa-mir-380/hsa-mir-1197/hsa-mir-323a/hsa-mir-758/hsa-mir-329-1/hsa-mir-329-2/hsa-mir-494/hsa-mir-1193/hsa-mir-543/hsa-mir-495/hsa-mir-376c/hsa-mir-376a-2/hsa-mir-654/hsa-mir-376b/hsa-mir-376a-1/hsa-mir-300/hsa-mir-1185-1/hsa-mir-1185-2/hsa-mir-381/hsa-mir-487b/hsa-mir-539/hsa-mir-889/hsa-mir-544a/hsa-mir-655/hsa-mir-487a/hsa-mir…	0
752	hsa-miR-1185-1-3p	chr14	+	hsa-mir-1185-1	Yes (101022070-101066786:42:HHC:hsa-mir-379/hsa-mir-411/hsa-mir-299/hsa-mir-380/hsa-mir-1197/hsa-mir-323a/hsa-mir-758/hsa-mir-329-1/hsa-mir-329-2/hsa-mir-494/hsa-mir-1193/hsa-mir-543/hsa-mir-495/hsa-mir-376c/hsa-mir-376a-2/hsa-mir-654/hsa-mir-376b/hsa-mir-376a-1/hsa-mir-300/hsa-mir-1185-1/hsa-mir-1185-2/hsa-mir-381/hsa-mir-487b/hsa-mir-539/hsa-mir-889/hsa-mir-544a/hsa-mir-655/hsa-mir-487a/hsa-mir…	2	rs369414498	101043032	T > C	9e-06	4	AUAUACAGGGGGAGACUCUUAU	AUACACAGGGGGAGACUCUUAU	hsa-miR-1185-1-3p,AUA[U/C]ACAGGGGGAGACUCUUAU	1451	1302	405	29.4656
752	hsa-miR-1185-1-3p	chr14	+	hsa-mir-1185-1	Yes (101022070-101066786:42:HHC:hsa-mir-379/hsa-mir-411/hsa-mir-299/hsa-mir-380/hsa-mir-1197/hsa-mir-323a/hsa-mir-758/hsa-mir-329-1/hsa-mir-329-2/hsa-mir-494/hsa-mir-1193/hsa-mir-543/hsa-mir-495/hsa-mir-376c/hsa-mir-376a-2/hsa-mir-654/hsa-mir-376b/hsa-mir-376a-1/hsa-mir-300/hsa-mir-1185-1/hsa-mir-1185-2/hsa-mir-381/hsa-mir-487b/hsa-mir-539/hsa-mir-889/hsa-mir-544a/hsa-mir-655/hsa-mir-487a/hsa-mir…	2	rs774958411	101043035	A > T	9e-06	7	AUAUACAGGGGGAGACUCUUAU	AUAUACUGGGGGAGACUCUUAU	hsa-miR-1185-1-3p,AUAUAC[A/U]GGGGGAGACUCUUAU	1451	783	265	24.8617
753	hsa-miR-1185-5p	chr14	+	hsa-mir-1185-2	Yes (101022070-101066786:42:HHC:hsa-mir-379/hsa-mir-411/hsa-mir-299/hsa-mir-380/hsa-mir-1197/hsa-mir-323a/hsa-mir-758/hsa-mir-329-1/hsa-mir-329-2/hsa-mir-494/hsa-mir-1193/hsa-mir-543/hsa-mir-495/hsa-mir-376c/hsa-mir-376a-2/hsa-mir-654/hsa-mir-376b/hsa-mir-376a-1/hsa-mir-300/hsa-mir-1185-1/hsa-mir-1185-2/hsa-mir-381/hsa-mir-487b/hsa-mir-539/hsa-mir-889/hsa-mir-544a/hsa-mir-655/hsa-mir-487a/hsa-mir…	0
754	hsa-miR-1185-2-3p	chr14	+	hsa-mir-1185-2	Yes (101022070-101066786:42:HHC:hsa-mir-379/hsa-mir-411/hsa-mir-299/hsa-mir-380/hsa-mir-1197/hsa-mir-323a/hsa-mir-758/hsa-mir-329-1/hsa-mir-329-2/hsa-mir-494/hsa-mir-1193/hsa-mir-543/hsa-mir-495/hsa-mir-376c/hsa-mir-376a-2/hsa-mir-654/hsa-mir-376b/hsa-mir-376a-1/hsa-mir-300/hsa-mir-1185-1/hsa-mir-1185-2/hsa-mir-381/hsa-mir-487b/hsa-mir-539/hsa-mir-889/hsa-mir-544a/hsa-mir-655/hsa-mir-487a/hsa-mir…	0
755	hsa-miR-381-3p	chr14	+	hsa-mir-381	Yes (101022070-101066786:42:HHC:hsa-mir-379/hsa-mir-411/hsa-mir-299/hsa-mir-380/hsa-mir-1197/hsa-mir-323a/hsa-mir-758/hsa-mir-329-1/hsa-mir-329-2/hsa-mir-494/hsa-mir-1193/hsa-mir-543/hsa-mir-495/hsa-mir-376c/hsa-mir-376a-2/hsa-mir-654/hsa-mir-376b/hsa-mir-376a-1/hsa-mir-300/hsa-mir-1185-1/hsa-mir-1185-2/hsa-mir-381/hsa-mir-487b/hsa-mir-539/hsa-mir-889/hsa-mir-544a/hsa-mir-655/hsa-mir-487a/hsa-mir…	0
756	hsa-miR-381-5p	chr14	+	hsa-mir-381	Yes (101022070-101066786:42:HHC:hsa-mir-379/hsa-mir-411/hsa-mir-299/hsa-mir-380/hsa-mir-1197/hsa-mir-323a/hsa-mir-758/hsa-mir-329-1/hsa-mir-329-2/hsa-mir-494/hsa-mir-1193/hsa-mir-543/hsa-mir-495/hsa-mir-376c/hsa-mir-376a-2/hsa-mir-654/hsa-mir-376b/hsa-mir-376a-1/hsa-mir-300/hsa-mir-1185-1/hsa-mir-1185-2/hsa-mir-381/hsa-mir-487b/hsa-mir-539/hsa-mir-889/hsa-mir-544a/hsa-mir-655/hsa-mir-487a/hsa-mir…	1	rs748900773	101045934	T > C	6.2e-05	8	AGCGAGGUUGCCCUUUGUAUAU	AGCGAGGCUGCCCUUUGUAUAU	hsa-miR-381-5p,AGCGAGG[U/C]UGCCCUUUGUAUAU	26	79	3	6.61944
757	hsa-miR-487b-3p	chr14	+	hsa-mir-487b	Yes (101022070-101066786:42:HHC:hsa-mir-379/hsa-mir-411/hsa-mir-299/hsa-mir-380/hsa-mir-1197/hsa-mir-323a/hsa-mir-758/hsa-mir-329-1/hsa-mir-329-2/hsa-mir-494/hsa-mir-1193/hsa-mir-543/hsa-mir-495/hsa-mir-376c/hsa-mir-376a-2/hsa-mir-654/hsa-mir-376b/hsa-mir-376a-1/hsa-mir-300/hsa-mir-1185-1/hsa-mir-1185-2/hsa-mir-381/hsa-mir-487b/hsa-mir-539/hsa-mir-889/hsa-mir-544a/hsa-mir-655/hsa-mir-487a/hsa-mir…	2	rs749314196	101046509	G > T	8e-06	5	AAUCGUACAGGGUCAUCCACUU	AAUCUUACAGGGUCAUCCACUU	hsa-miR-487b-3p,AAUC[G/U]UACAGGGUCAUCCACUU	36	654	4	2.60687
757	hsa-miR-487b-3p	chr14	+	hsa-mir-487b	Yes (101022070-101066786:42:HHC:hsa-mir-379/hsa-mir-411/hsa-mir-299/hsa-mir-380/hsa-mir-1197/hsa-mir-323a/hsa-mir-758/hsa-mir-329-1/hsa-mir-329-2/hsa-mir-494/hsa-mir-1193/hsa-mir-543/hsa-mir-495/hsa-mir-376c/hsa-mir-376a-2/hsa-mir-654/hsa-mir-376b/hsa-mir-376a-1/hsa-mir-300/hsa-mir-1185-1/hsa-mir-1185-2/hsa-mir-381/hsa-mir-487b/hsa-mir-539/hsa-mir-889/hsa-mir-544a/hsa-mir-655/hsa-mir-487a/hsa-mir…	2	rs781217032	101046507	T > C	8e-06	3	AAUCGUACAGGGUCAUCCACUU	AACCGUACAGGGUCAUCCACUU	hsa-miR-487b-3p,AA[U/C]CGUACAGGGUCAUCCACUU	36	30	1	3.0429
758	hsa-miR-487b-5p	chr14	+	hsa-mir-487b	Yes (101022070-101066786:42:HHC:hsa-mir-379/hsa-mir-411/hsa-mir-299/hsa-mir-380/hsa-mir-1197/hsa-mir-323a/hsa-mir-758/hsa-mir-329-1/hsa-mir-329-2/hsa-mir-494/hsa-mir-1193/hsa-mir-543/hsa-mir-495/hsa-mir-376c/hsa-mir-376a-2/hsa-mir-654/hsa-mir-376b/hsa-mir-376a-1/hsa-mir-300/hsa-mir-1185-1/hsa-mir-1185-2/hsa-mir-381/hsa-mir-487b/hsa-mir-539/hsa-mir-889/hsa-mir-544a/hsa-mir-655/hsa-mir-487a/hsa-mir…	0
759	hsa-miR-539-5p	chr14	+	hsa-mir-539	Yes (101022070-101066786:42:HHC:hsa-mir-379/hsa-mir-411/hsa-mir-299/hsa-mir-380/hsa-mir-1197/hsa-mir-323a/hsa-mir-758/hsa-mir-329-1/hsa-mir-329-2/hsa-mir-494/hsa-mir-1193/hsa-mir-543/hsa-mir-495/hsa-mir-376c/hsa-mir-376a-2/hsa-mir-654/hsa-mir-376b/hsa-mir-376a-1/hsa-mir-300/hsa-mir-1185-1/hsa-mir-1185-2/hsa-mir-381/hsa-mir-487b/hsa-mir-539/hsa-mir-889/hsa-mir-544a/hsa-mir-655/hsa-mir-487a/hsa-mir…	0
760	hsa-miR-539-3p	chr14	+	hsa-mir-539	Yes (101022070-101066786:42:HHC:hsa-mir-379/hsa-mir-411/hsa-mir-299/hsa-mir-380/hsa-mir-1197/hsa-mir-323a/hsa-mir-758/hsa-mir-329-1/hsa-mir-329-2/hsa-mir-494/hsa-mir-1193/hsa-mir-543/hsa-mir-495/hsa-mir-376c/hsa-mir-376a-2/hsa-mir-654/hsa-mir-376b/hsa-mir-376a-1/hsa-mir-300/hsa-mir-1185-1/hsa-mir-1185-2/hsa-mir-381/hsa-mir-487b/hsa-mir-539/hsa-mir-889/hsa-mir-544a/hsa-mir-655/hsa-mir-487a/hsa-mir…	1	rs760174615	101047374	A > G	8e-06	6	AUCAUACAAGGACAAUUUCUUU	AUCAUGCAAGGACAAUUUCUUU	hsa-miR-539-3p,AUCAU[A/G]CAAGGACAAUUUCUUU	762	577	92	13.8747
761	hsa-miR-889-3p	chr14	+	hsa-mir-889	Yes (101022070-101066786:42:HHC:hsa-mir-379/hsa-mir-411/hsa-mir-299/hsa-mir-380/hsa-mir-1197/hsa-mir-323a/hsa-mir-758/hsa-mir-329-1/hsa-mir-329-2/hsa-mir-494/hsa-mir-1193/hsa-mir-543/hsa-mir-495/hsa-mir-376c/hsa-mir-376a-2/hsa-mir-654/hsa-mir-376b/hsa-mir-376a-1/hsa-mir-300/hsa-mir-1185-1/hsa-mir-1185-2/hsa-mir-381/hsa-mir-487b/hsa-mir-539/hsa-mir-889/hsa-mir-544a/hsa-mir-655/hsa-mir-487a/hsa-mir…	2	rs758345659	101047954	A > G	9e-06	6	UUAAUAUCGGACAACCAUUGU	UUAAUGUCGGACAACCAUUGU	hsa-miR-889-3p,UUAAU[A/G]UCGGACAACCAUUGU	1266	774	241	24.3461
761	hsa-miR-889-3p	chr14	+	hsa-mir-889	Yes (101022070-101066786:42:HHC:hsa-mir-379/hsa-mir-411/hsa-mir-299/hsa-mir-380/hsa-mir-1197/hsa-mir-323a/hsa-mir-758/hsa-mir-329-1/hsa-mir-329-2/hsa-mir-494/hsa-mir-1193/hsa-mir-543/hsa-mir-495/hsa-mir-376c/hsa-mir-376a-2/hsa-mir-654/hsa-mir-376b/hsa-mir-376a-1/hsa-mir-300/hsa-mir-1185-1/hsa-mir-1185-2/hsa-mir-381/hsa-mir-487b/hsa-mir-539/hsa-mir-889/hsa-mir-544a/hsa-mir-655/hsa-mir-487a/hsa-mir…	2	rs377265045	101047956	C > T	3.5e-05	8	UUAAUAUCGGACAACCAUUGU	UUAAUAUUGGACAACCAUUGU	hsa-miR-889-3p,UUAAUAU[C/U]GGACAACCAUUGU	1266	1893	955	61.6895
762	hsa-miR-889-5p	chr14	+	hsa-mir-889	Yes (101022070-101066786:42:HHC:hsa-mir-379/hsa-mir-411/hsa-mir-299/hsa-mir-380/hsa-mir-1197/hsa-mir-323a/hsa-mir-758/hsa-mir-329-1/hsa-mir-329-2/hsa-mir-494/hsa-mir-1193/hsa-mir-543/hsa-mir-495/hsa-mir-376c/hsa-mir-376a-2/hsa-mir-654/hsa-mir-376b/hsa-mir-376a-1/hsa-mir-300/hsa-mir-1185-1/hsa-mir-1185-2/hsa-mir-381/hsa-mir-487b/hsa-mir-539/hsa-mir-889/hsa-mir-544a/hsa-mir-655/hsa-mir-487a/hsa-mir…	0
763	hsa-miR-544a	chr14	+	hsa-mir-544a	Yes (101022070-101066786:42:HHC:hsa-mir-379/hsa-mir-411/hsa-mir-299/hsa-mir-380/hsa-mir-1197/hsa-mir-323a/hsa-mir-758/hsa-mir-329-1/hsa-mir-329-2/hsa-mir-494/hsa-mir-1193/hsa-mir-543/hsa-mir-495/hsa-mir-376c/hsa-mir-376a-2/hsa-mir-654/hsa-mir-376b/hsa-mir-376a-1/hsa-mir-300/hsa-mir-1185-1/hsa-mir-1185-2/hsa-mir-381/hsa-mir-487b/hsa-mir-539/hsa-mir-889/hsa-mir-544a/hsa-mir-655/hsa-mir-487a/hsa-mir…	0
764	hsa-miR-655-3p	chr14	+	hsa-mir-655	Yes (101022070-101066786:42:HHC:hsa-mir-379/hsa-mir-411/hsa-mir-299/hsa-mir-380/hsa-mir-1197/hsa-mir-323a/hsa-mir-758/hsa-mir-329-1/hsa-mir-329-2/hsa-mir-494/hsa-mir-1193/hsa-mir-543/hsa-mir-495/hsa-mir-376c/hsa-mir-376a-2/hsa-mir-654/hsa-mir-376b/hsa-mir-376a-1/hsa-mir-300/hsa-mir-1185-1/hsa-mir-1185-2/hsa-mir-381/hsa-mir-487b/hsa-mir-539/hsa-mir-889/hsa-mir-544a/hsa-mir-655/hsa-mir-487a/hsa-mir…	0
765	hsa-miR-655-5p	chr14	+	hsa-mir-655	Yes (101022070-101066786:42:HHC:hsa-mir-379/hsa-mir-411/hsa-mir-299/hsa-mir-380/hsa-mir-1197/hsa-mir-323a/hsa-mir-758/hsa-mir-329-1/hsa-mir-329-2/hsa-mir-494/hsa-mir-1193/hsa-mir-543/hsa-mir-495/hsa-mir-376c/hsa-mir-376a-2/hsa-mir-654/hsa-mir-376b/hsa-mir-376a-1/hsa-mir-300/hsa-mir-1185-1/hsa-mir-1185-2/hsa-mir-381/hsa-mir-487b/hsa-mir-539/hsa-mir-889/hsa-mir-544a/hsa-mir-655/hsa-mir-487a/hsa-mir…	2	rs754023562	101049576	G > T	8e-06	5	AGAGGUUAUCCGUGUUAUGUUC	AGAGUUUAUCCGUGUUAUGUUC	hsa-miR-655-5p,AGAG[G/U]UUAUCCGUGUUAUGUUC	412	708	47	8.70227
765	hsa-miR-655-5p	chr14	+	hsa-mir-655	Yes (101022070-101066786:42:HHC:hsa-mir-379/hsa-mir-411/hsa-mir-299/hsa-mir-380/hsa-mir-1197/hsa-mir-323a/hsa-mir-758/hsa-mir-329-1/hsa-mir-329-2/hsa-mir-494/hsa-mir-1193/hsa-mir-543/hsa-mir-495/hsa-mir-376c/hsa-mir-376a-2/hsa-mir-654/hsa-mir-376b/hsa-mir-376a-1/hsa-mir-300/hsa-mir-1185-1/hsa-mir-1185-2/hsa-mir-381/hsa-mir-487b/hsa-mir-539/hsa-mir-889/hsa-mir-544a/hsa-mir-655/hsa-mir-487a/hsa-mir…	2	rs766575622	101049575	G > A	8e-06	4	AGAGGUUAUCCGUGUUAUGUUC	AGAAGUUAUCCGUGUUAUGUUC	hsa-miR-655-5p,AGA[G/A]GUUAUCCGUGUUAUGUUC	412	736	61	11.0775
766	hsa-miR-487a-3p	chr14	+	hsa-mir-487a	Yes (101022070-101066786:42:HHC:hsa-mir-379/hsa-mir-411/hsa-mir-299/hsa-mir-380/hsa-mir-1197/hsa-mir-323a/hsa-mir-758/hsa-mir-329-1/hsa-mir-329-2/hsa-mir-494/hsa-mir-1193/hsa-mir-543/hsa-mir-495/hsa-mir-376c/hsa-mir-376a-2/hsa-mir-654/hsa-mir-376b/hsa-mir-376a-1/hsa-mir-300/hsa-mir-1185-1/hsa-mir-1185-2/hsa-mir-381/hsa-mir-487b/hsa-mir-539/hsa-mir-889/hsa-mir-544a/hsa-mir-655/hsa-mir-487a/hsa-mir…	1	rs769864586	101052501	C > T	8e-06	8	AAUCAUACAGGGACAUCCAGUU	AAUCAUAUAGGGACAUCCAGUU	hsa-miR-487a-3p,AAUCAUA[C/U]AGGGACAUCCAGUU	636	810	344	47.9278
767	hsa-miR-487a-5p	chr14	+	hsa-mir-487a	Yes (101022070-101066786:42:HHC:hsa-mir-379/hsa-mir-411/hsa-mir-299/hsa-mir-380/hsa-mir-1197/hsa-mir-323a/hsa-mir-758/hsa-mir-329-1/hsa-mir-329-2/hsa-mir-494/hsa-mir-1193/hsa-mir-543/hsa-mir-495/hsa-mir-376c/hsa-mir-376a-2/hsa-mir-654/hsa-mir-376b/hsa-mir-376a-1/hsa-mir-300/hsa-mir-1185-1/hsa-mir-1185-2/hsa-mir-381/hsa-mir-487b/hsa-mir-539/hsa-mir-889/hsa-mir-544a/hsa-mir-655/hsa-mir-487a/hsa-mir…	0
768	hsa-miR-382-5p	chr14	+	hsa-mir-382	Yes (101022070-101066786:42:HHC:hsa-mir-379/hsa-mir-411/hsa-mir-299/hsa-mir-380/hsa-mir-1197/hsa-mir-323a/hsa-mir-758/hsa-mir-329-1/hsa-mir-329-2/hsa-mir-494/hsa-mir-1193/hsa-mir-543/hsa-mir-495/hsa-mir-376c/hsa-mir-376a-2/hsa-mir-654/hsa-mir-376b/hsa-mir-376a-1/hsa-mir-300/hsa-mir-1185-1/hsa-mir-1185-2/hsa-mir-381/hsa-mir-487b/hsa-mir-539/hsa-mir-889/hsa-mir-544a/hsa-mir-655/hsa-mir-487a/hsa-mir…	1	rs192719529	101054320	T > C	1.8e-05	5	GAAGUUGUUCGUGGUGGAUUCG	GAAGCUGUUCGUGGUGGAUUCG	hsa-miR-382-5p,GAAG[U/C]UGUUCGUGGUGGAUUCG	616	597	76	12.5325
769	hsa-miR-382-3p	chr14	+	hsa-mir-382	Yes (101022070-101066786:42:HHC:hsa-mir-379/hsa-mir-411/hsa-mir-299/hsa-mir-380/hsa-mir-1197/hsa-mir-323a/hsa-mir-758/hsa-mir-329-1/hsa-mir-329-2/hsa-mir-494/hsa-mir-1193/hsa-mir-543/hsa-mir-495/hsa-mir-376c/hsa-mir-376a-2/hsa-mir-654/hsa-mir-376b/hsa-mir-376a-1/hsa-mir-300/hsa-mir-1185-1/hsa-mir-1185-2/hsa-mir-381/hsa-mir-487b/hsa-mir-539/hsa-mir-889/hsa-mir-544a/hsa-mir-655/hsa-mir-487a/hsa-mir…	1	rs370422247	101054354	T > G	9e-06	3	AAUCAUUCACGGACAACACUU	AAGCAUUCACGGACAACACUU	hsa-miR-382-3p,AA[U/G]CAUUCACGGACAACACUU	894	772	195	23.4724
770	hsa-miR-134-5p	chr14	+	hsa-mir-134	Yes (101022070-101066786:42:HHC:hsa-mir-379/hsa-mir-411/hsa-mir-299/hsa-mir-380/hsa-mir-1197/hsa-mir-323a/hsa-mir-758/hsa-mir-329-1/hsa-mir-329-2/hsa-mir-494/hsa-mir-1193/hsa-mir-543/hsa-mir-495/hsa-mir-376c/hsa-mir-376a-2/hsa-mir-654/hsa-mir-376b/hsa-mir-376a-1/hsa-mir-300/hsa-mir-1185-1/hsa-mir-1185-2/hsa-mir-381/hsa-mir-487b/hsa-mir-539/hsa-mir-889/hsa-mir-544a/hsa-mir-655/hsa-mir-487a/hsa-mir…	1	rs781762860	101054695	G > C	1.7e-05	2	UGUGACUGGUUGACCAGAGGGG	UCUGACUGGUUGACCAGAGGGG	hsa-miR-134-5p,U[G/C]UGACUGGUUGACCAGAGGGG	436	445	35	7.94593
771	hsa-miR-134-3p	chr14	+	hsa-mir-134	Yes (101022070-101066786:42:HHC:hsa-mir-379/hsa-mir-411/hsa-mir-299/hsa-mir-380/hsa-mir-1197/hsa-mir-323a/hsa-mir-758/hsa-mir-329-1/hsa-mir-329-2/hsa-mir-494/hsa-mir-1193/hsa-mir-543/hsa-mir-495/hsa-mir-376c/hsa-mir-376a-2/hsa-mir-654/hsa-mir-376b/hsa-mir-376a-1/hsa-mir-300/hsa-mir-1185-1/hsa-mir-1185-2/hsa-mir-381/hsa-mir-487b/hsa-mir-539/hsa-mir-889/hsa-mir-544a/hsa-mir-655/hsa-mir-487a/hsa-mir…	2	rs773121278	101054738	G > A	1.7e-05	7	CCUGUGGGCCACCUAGUCACCAA	CCUGUGAGCCACCUAGUCACCAA	hsa-miR-134-3p,CCUGUG[G/A]GCCACCUAGUCACCAA	639	591	72	11.7162
771	hsa-miR-134-3p	chr14	+	hsa-mir-134	Yes (101022070-101066786:42:HHC:hsa-mir-379/hsa-mir-411/hsa-mir-299/hsa-mir-380/hsa-mir-1197/hsa-mir-323a/hsa-mir-758/hsa-mir-329-1/hsa-mir-329-2/hsa-mir-494/hsa-mir-1193/hsa-mir-543/hsa-mir-495/hsa-mir-376c/hsa-mir-376a-2/hsa-mir-654/hsa-mir-376b/hsa-mir-376a-1/hsa-mir-300/hsa-mir-1185-1/hsa-mir-1185-2/hsa-mir-381/hsa-mir-487b/hsa-mir-539/hsa-mir-889/hsa-mir-544a/hsa-mir-655/hsa-mir-487a/hsa-mir…	2	rs760717795	101054739	G > A	8e-06	8	CCUGUGGGCCACCUAGUCACCAA	CCUGUGGACCACCUAGUCACCAA	hsa-miR-134-3p,CCUGUGG[G/A]CCACCUAGUCACCAA	639	657	275	42.4424
772	hsa-miR-668-3p	chr14	+	hsa-mir-668	Yes (101022070-101066786:42:HHC:hsa-mir-379/hsa-mir-411/hsa-mir-299/hsa-mir-380/hsa-mir-1197/hsa-mir-323a/hsa-mir-758/hsa-mir-329-1/hsa-mir-329-2/hsa-mir-494/hsa-mir-1193/hsa-mir-543/hsa-mir-495/hsa-mir-376c/hsa-mir-376a-2/hsa-mir-654/hsa-mir-376b/hsa-mir-376a-1/hsa-mir-300/hsa-mir-1185-1/hsa-mir-1185-2/hsa-mir-381/hsa-mir-487b/hsa-mir-539/hsa-mir-889/hsa-mir-544a/hsa-mir-655/hsa-mir-487a/hsa-mir…	2	rs377555530	101055305	C > T	4.1e-05	6	UGUCACUCGGCUCGGCCCACUAC	UGUCAUUCGGCUCGGCCCACUAC	hsa-miR-668-3p,UGUCA[C/U]UCGGCUCGGCCCACUAC	374	637	49	10.039
772	hsa-miR-668-3p	chr14	+	hsa-mir-668	Yes (101022070-101066786:42:HHC:hsa-mir-379/hsa-mir-411/hsa-mir-299/hsa-mir-380/hsa-mir-1197/hsa-mir-323a/hsa-mir-758/hsa-mir-329-1/hsa-mir-329-2/hsa-mir-494/hsa-mir-1193/hsa-mir-543/hsa-mir-495/hsa-mir-376c/hsa-mir-376a-2/hsa-mir-654/hsa-mir-376b/hsa-mir-376a-1/hsa-mir-300/hsa-mir-1185-1/hsa-mir-1185-2/hsa-mir-381/hsa-mir-487b/hsa-mir-539/hsa-mir-889/hsa-mir-544a/hsa-mir-655/hsa-mir-487a/hsa-mir…	2	rs777430170	101055307	C > T	3.3e-05	8	UGUCACUCGGCUCGGCCCACUAC	UGUCACUUGGCUCGGCCCACUAC	hsa-miR-668-3p,UGUCACU[C/U]GGCUCGGCCCACUAC	374	515	151	34.4063
773	hsa-miR-668-5p	chr14	+	hsa-mir-668	Yes (101022070-101066786:42:HHC:hsa-mir-379/hsa-mir-411/hsa-mir-299/hsa-mir-380/hsa-mir-1197/hsa-mir-323a/hsa-mir-758/hsa-mir-329-1/hsa-mir-329-2/hsa-mir-494/hsa-mir-1193/hsa-mir-543/hsa-mir-495/hsa-mir-376c/hsa-mir-376a-2/hsa-mir-654/hsa-mir-376b/hsa-mir-376a-1/hsa-mir-300/hsa-mir-1185-1/hsa-mir-1185-2/hsa-mir-381/hsa-mir-487b/hsa-mir-539/hsa-mir-889/hsa-mir-544a/hsa-mir-655/hsa-mir-487a/hsa-mir…	1	rs750767425	101055267	G > A	6.7e-05	4	UGCGCCUCGGGUGAGCAUG	UGCACCUCGGGUGAGCAUG	hsa-miR-668-5p,UGC[G/A]CCUCGGGUGAGCAUG	36	316	0	0
774	hsa-miR-485-5p	chr14	+	hsa-mir-485	Yes (101022070-101066786:42:HHC:hsa-mir-379/hsa-mir-411/hsa-mir-299/hsa-mir-380/hsa-mir-1197/hsa-mir-323a/hsa-mir-758/hsa-mir-329-1/hsa-mir-329-2/hsa-mir-494/hsa-mir-1193/hsa-mir-543/hsa-mir-495/hsa-mir-376c/hsa-mir-376a-2/hsa-mir-654/hsa-mir-376b/hsa-mir-376a-1/hsa-mir-300/hsa-mir-1185-1/hsa-mir-1185-2/hsa-mir-381/hsa-mir-487b/hsa-mir-539/hsa-mir-889/hsa-mir-544a/hsa-mir-655/hsa-mir-487a/hsa-mir…	0
775	hsa-miR-485-3p	chr14	+	hsa-mir-485	Yes (101022070-101066786:42:HHC:hsa-mir-379/hsa-mir-411/hsa-mir-299/hsa-mir-380/hsa-mir-1197/hsa-mir-323a/hsa-mir-758/hsa-mir-329-1/hsa-mir-329-2/hsa-mir-494/hsa-mir-1193/hsa-mir-543/hsa-mir-495/hsa-mir-376c/hsa-mir-376a-2/hsa-mir-654/hsa-mir-376b/hsa-mir-376a-1/hsa-mir-300/hsa-mir-1185-1/hsa-mir-1185-2/hsa-mir-381/hsa-mir-487b/hsa-mir-539/hsa-mir-889/hsa-mir-544a/hsa-mir-655/hsa-mir-487a/hsa-mir…	0
776	hsa-miR-323b-5p	chr14	+	hsa-mir-323b	Yes (101022070-101066786:42:HHC:hsa-mir-379/hsa-mir-411/hsa-mir-299/hsa-mir-380/hsa-mir-1197/hsa-mir-323a/hsa-mir-758/hsa-mir-329-1/hsa-mir-329-2/hsa-mir-494/hsa-mir-1193/hsa-mir-543/hsa-mir-495/hsa-mir-376c/hsa-mir-376a-2/hsa-mir-654/hsa-mir-376b/hsa-mir-376a-1/hsa-mir-300/hsa-mir-1185-1/hsa-mir-1185-2/hsa-mir-381/hsa-mir-487b/hsa-mir-539/hsa-mir-889/hsa-mir-544a/hsa-mir-655/hsa-mir-487a/hsa-mir…	3	rs768984660	101056238	G > T	8e-06	6	AGGUUGUCCGUGGUGAGUUCGCA	AGGUUUUCCGUGGUGAGUUCGCA	hsa-miR-323b-5p,AGGUU[G/U]UCCGUGGUGAGUUCGCA	256	1145	43	7.94229
776	hsa-miR-323b-5p	chr14	+	hsa-mir-323b	Yes (101022070-101066786:42:HHC:hsa-mir-379/hsa-mir-411/hsa-mir-299/hsa-mir-380/hsa-mir-1197/hsa-mir-323a/hsa-mir-758/hsa-mir-329-1/hsa-mir-329-2/hsa-mir-494/hsa-mir-1193/hsa-mir-543/hsa-mir-495/hsa-mir-376c/hsa-mir-376a-2/hsa-mir-654/hsa-mir-376b/hsa-mir-376a-1/hsa-mir-300/hsa-mir-1185-1/hsa-mir-1185-2/hsa-mir-381/hsa-mir-487b/hsa-mir-539/hsa-mir-889/hsa-mir-544a/hsa-mir-655/hsa-mir-487a/hsa-mir…	3	rs763328182	101056235	G > A	8e-06	3	AGGUUGUCCGUGGUGAGUUCGCA	AGAUUGUCCGUGGUGAGUUCGCA	hsa-miR-323b-5p,AG[G/A]UUGUCCGUGGUGAGUUCGCA	256	297	10	3.62662
776	hsa-miR-323b-5p	chr14	+	hsa-mir-323b	Yes (101022070-101066786:42:HHC:hsa-mir-379/hsa-mir-411/hsa-mir-299/hsa-mir-380/hsa-mir-1197/hsa-mir-323a/hsa-mir-758/hsa-mir-329-1/hsa-mir-329-2/hsa-mir-494/hsa-mir-1193/hsa-mir-543/hsa-mir-495/hsa-mir-376c/hsa-mir-376a-2/hsa-mir-654/hsa-mir-376b/hsa-mir-376a-1/hsa-mir-300/hsa-mir-1185-1/hsa-mir-1185-2/hsa-mir-381/hsa-mir-487b/hsa-mir-539/hsa-mir-889/hsa-mir-544a/hsa-mir-655/hsa-mir-487a/hsa-mir…	3	rs774925833	101056239	T > C	8e-06	7	AGGUUGUCCGUGGUGAGUUCGCA	AGGUUGCCCGUGGUGAGUUCGCA	hsa-miR-323b-5p,AGGUUG[U/C]CCGUGGUGAGUUCGCA	256	198	9	3.99751
777	hsa-miR-323b-3p	chr14	+	hsa-mir-323b	Yes (101022070-101066786:42:HHC:hsa-mir-379/hsa-mir-411/hsa-mir-299/hsa-mir-380/hsa-mir-1197/hsa-mir-323a/hsa-mir-758/hsa-mir-329-1/hsa-mir-329-2/hsa-mir-494/hsa-mir-1193/hsa-mir-543/hsa-mir-495/hsa-mir-376c/hsa-mir-376a-2/hsa-mir-654/hsa-mir-376b/hsa-mir-376a-1/hsa-mir-300/hsa-mir-1185-1/hsa-mir-1185-2/hsa-mir-381/hsa-mir-487b/hsa-mir-539/hsa-mir-889/hsa-mir-544a/hsa-mir-655/hsa-mir-487a/hsa-mir…	0
778	hsa-miR-154-5p	chr14	+	hsa-mir-154	Yes (101022070-101066786:42:HHC:hsa-mir-379/hsa-mir-411/hsa-mir-299/hsa-mir-380/hsa-mir-1197/hsa-mir-323a/hsa-mir-758/hsa-mir-329-1/hsa-mir-329-2/hsa-mir-494/hsa-mir-1193/hsa-mir-543/hsa-mir-495/hsa-mir-376c/hsa-mir-376a-2/hsa-mir-654/hsa-mir-376b/hsa-mir-376a-1/hsa-mir-300/hsa-mir-1185-1/hsa-mir-1185-2/hsa-mir-381/hsa-mir-487b/hsa-mir-539/hsa-mir-889/hsa-mir-544a/hsa-mir-655/hsa-mir-487a/hsa-mir…	0
779	hsa-miR-154-3p	chr14	+	hsa-mir-154	Yes (101022070-101066786:42:HHC:hsa-mir-379/hsa-mir-411/hsa-mir-299/hsa-mir-380/hsa-mir-1197/hsa-mir-323a/hsa-mir-758/hsa-mir-329-1/hsa-mir-329-2/hsa-mir-494/hsa-mir-1193/hsa-mir-543/hsa-mir-495/hsa-mir-376c/hsa-mir-376a-2/hsa-mir-654/hsa-mir-376b/hsa-mir-376a-1/hsa-mir-300/hsa-mir-1185-1/hsa-mir-1185-2/hsa-mir-381/hsa-mir-487b/hsa-mir-539/hsa-mir-889/hsa-mir-544a/hsa-mir-655/hsa-mir-487a/hsa-mir…	0
780	hsa-miR-496	chr14	+	hsa-mir-496	Yes (101022070-101066786:42:HHC:hsa-mir-379/hsa-mir-411/hsa-mir-299/hsa-mir-380/hsa-mir-1197/hsa-mir-323a/hsa-mir-758/hsa-mir-329-1/hsa-mir-329-2/hsa-mir-494/hsa-mir-1193/hsa-mir-543/hsa-mir-495/hsa-mir-376c/hsa-mir-376a-2/hsa-mir-654/hsa-mir-376b/hsa-mir-376a-1/hsa-mir-300/hsa-mir-1185-1/hsa-mir-1185-2/hsa-mir-381/hsa-mir-487b/hsa-mir-539/hsa-mir-889/hsa-mir-544a/hsa-mir-655/hsa-mir-487a/hsa-mir…	0
781	hsa-miR-377-5p	chr14	+	hsa-mir-377	Yes (101022070-101066786:42:HHC:hsa-mir-379/hsa-mir-411/hsa-mir-299/hsa-mir-380/hsa-mir-1197/hsa-mir-323a/hsa-mir-758/hsa-mir-329-1/hsa-mir-329-2/hsa-mir-494/hsa-mir-1193/hsa-mir-543/hsa-mir-495/hsa-mir-376c/hsa-mir-376a-2/hsa-mir-654/hsa-mir-376b/hsa-mir-376a-1/hsa-mir-300/hsa-mir-1185-1/hsa-mir-1185-2/hsa-mir-381/hsa-mir-487b/hsa-mir-539/hsa-mir-889/hsa-mir-544a/hsa-mir-655/hsa-mir-487a/hsa-mir…	1	rs770711613	101062059	G > T	8e-06	4	AGAGGUUGCCCUUGGUGAAUUC	AGAUGUUGCCCUUGGUGAAUUC	hsa-miR-377-5p,AGA[G/U]GUUGCCCUUGGUGAAUUC	321	411	27	7.43345
782	hsa-miR-377-3p	chr14	+	hsa-mir-377	Yes (101022070-101066786:42:HHC:hsa-mir-379/hsa-mir-411/hsa-mir-299/hsa-mir-380/hsa-mir-1197/hsa-mir-323a/hsa-mir-758/hsa-mir-329-1/hsa-mir-329-2/hsa-mir-494/hsa-mir-1193/hsa-mir-543/hsa-mir-495/hsa-mir-376c/hsa-mir-376a-2/hsa-mir-654/hsa-mir-376b/hsa-mir-376a-1/hsa-mir-300/hsa-mir-1185-1/hsa-mir-1185-2/hsa-mir-381/hsa-mir-487b/hsa-mir-539/hsa-mir-889/hsa-mir-544a/hsa-mir-655/hsa-mir-487a/hsa-mir…	1	rs767804025	101062096	C > T	8e-06	3	AUCACACAAAGGCAACUUUUGU	AUUACACAAAGGCAACUUUUGU	hsa-miR-377-3p,AU[C/U]ACACAAAGGCAACUUUUGU	955	1143	183	17.5157
783	hsa-miR-541-5p	chr14	+	hsa-mir-541	Yes (101022070-101066786:42:HHC:hsa-mir-379/hsa-mir-411/hsa-mir-299/hsa-mir-380/hsa-mir-1197/hsa-mir-323a/hsa-mir-758/hsa-mir-329-1/hsa-mir-329-2/hsa-mir-494/hsa-mir-1193/hsa-mir-543/hsa-mir-495/hsa-mir-376c/hsa-mir-376a-2/hsa-mir-654/hsa-mir-376b/hsa-mir-376a-1/hsa-mir-300/hsa-mir-1185-1/hsa-mir-1185-2/hsa-mir-381/hsa-mir-487b/hsa-mir-539/hsa-mir-889/hsa-mir-544a/hsa-mir-655/hsa-mir-487a/hsa-mir…	1	rs748290671	101064505	A > G	8e-06	2	AAAGGAUUCUGCUGUCGGUCCCACU	AGAGGAUUCUGCUGUCGGUCCCACU	hsa-miR-541-5p,A[A/G]AGGAUUCUGCUGUCGGUCCCACU	665	394	55	10.7449
784	hsa-miR-541-3p	chr14	+	hsa-mir-541	Yes (101022070-101066786:42:HHC:hsa-mir-379/hsa-mir-411/hsa-mir-299/hsa-mir-380/hsa-mir-1197/hsa-mir-323a/hsa-mir-758/hsa-mir-329-1/hsa-mir-329-2/hsa-mir-494/hsa-mir-1193/hsa-mir-543/hsa-mir-495/hsa-mir-376c/hsa-mir-376a-2/hsa-mir-654/hsa-mir-376b/hsa-mir-376a-1/hsa-mir-300/hsa-mir-1185-1/hsa-mir-1185-2/hsa-mir-381/hsa-mir-487b/hsa-mir-539/hsa-mir-889/hsa-mir-544a/hsa-mir-655/hsa-mir-487a/hsa-mir…	0
785	hsa-miR-409-5p	chr14	+	hsa-mir-409	Yes (101022070-101066786:42:HHC:hsa-mir-379/hsa-mir-411/hsa-mir-299/hsa-mir-380/hsa-mir-1197/hsa-mir-323a/hsa-mir-758/hsa-mir-329-1/hsa-mir-329-2/hsa-mir-494/hsa-mir-1193/hsa-mir-543/hsa-mir-495/hsa-mir-376c/hsa-mir-376a-2/hsa-mir-654/hsa-mir-376b/hsa-mir-376a-1/hsa-mir-300/hsa-mir-1185-1/hsa-mir-1185-2/hsa-mir-381/hsa-mir-487b/hsa-mir-539/hsa-mir-889/hsa-mir-544a/hsa-mir-655/hsa-mir-487a/hsa-mir…	2	rs546934024	101065317	T > A	1.6e-05	4	AGGUUACCCGAGCAACUUUGCAU	AGGAUACCCGAGCAACUUUGCAU	hsa-miR-409-5p,AGG[U/A]UACCCGAGCAACUUUGCAU	243	183	7	3.31947
785	hsa-miR-409-5p	chr14	+	hsa-mir-409	Yes (101022070-101066786:42:HHC:hsa-mir-379/hsa-mir-411/hsa-mir-299/hsa-mir-380/hsa-mir-1197/hsa-mir-323a/hsa-mir-758/hsa-mir-329-1/hsa-mir-329-2/hsa-mir-494/hsa-mir-1193/hsa-mir-543/hsa-mir-495/hsa-mir-376c/hsa-mir-376a-2/hsa-mir-654/hsa-mir-376b/hsa-mir-376a-1/hsa-mir-300/hsa-mir-1185-1/hsa-mir-1185-2/hsa-mir-381/hsa-mir-487b/hsa-mir-539/hsa-mir-889/hsa-mir-544a/hsa-mir-655/hsa-mir-487a/hsa-mir…	2	rs773873342	101065320	C > A	0.008455	7	AGGUUACCCGAGCAACUUUGCAU	AGGUUAACCGAGCAACUUUGCAU	hsa-miR-409-5p,AGGUUA[C/A]CCGAGCAACUUUGCAU	243	411	29	9.17643
786	hsa-miR-409-3p	chr14	+	hsa-mir-409	Yes (101022070-101066786:42:HHC:hsa-mir-379/hsa-mir-411/hsa-mir-299/hsa-mir-380/hsa-mir-1197/hsa-mir-323a/hsa-mir-758/hsa-mir-329-1/hsa-mir-329-2/hsa-mir-494/hsa-mir-1193/hsa-mir-543/hsa-mir-495/hsa-mir-376c/hsa-mir-376a-2/hsa-mir-654/hsa-mir-376b/hsa-mir-376a-1/hsa-mir-300/hsa-mir-1185-1/hsa-mir-1185-2/hsa-mir-381/hsa-mir-487b/hsa-mir-539/hsa-mir-889/hsa-mir-544a/hsa-mir-655/hsa-mir-487a/hsa-mir…	0
787	hsa-miR-412-3p	chr14	+	hsa-mir-412	Yes (101022070-101066786:42:HHC:hsa-mir-379/hsa-mir-411/hsa-mir-299/hsa-mir-380/hsa-mir-1197/hsa-mir-323a/hsa-mir-758/hsa-mir-329-1/hsa-mir-329-2/hsa-mir-494/hsa-mir-1193/hsa-mir-543/hsa-mir-495/hsa-mir-376c/hsa-mir-376a-2/hsa-mir-654/hsa-mir-376b/hsa-mir-376a-1/hsa-mir-300/hsa-mir-1185-1/hsa-mir-1185-2/hsa-mir-381/hsa-mir-487b/hsa-mir-539/hsa-mir-889/hsa-mir-544a/hsa-mir-655/hsa-mir-487a/hsa-mir…	0
788	hsa-miR-412-5p	chr14	+	hsa-mir-412	Yes (101022070-101066786:42:HHC:hsa-mir-379/hsa-mir-411/hsa-mir-299/hsa-mir-380/hsa-mir-1197/hsa-mir-323a/hsa-mir-758/hsa-mir-329-1/hsa-mir-329-2/hsa-mir-494/hsa-mir-1193/hsa-mir-543/hsa-mir-495/hsa-mir-376c/hsa-mir-376a-2/hsa-mir-654/hsa-mir-376b/hsa-mir-376a-1/hsa-mir-300/hsa-mir-1185-1/hsa-mir-1185-2/hsa-mir-381/hsa-mir-487b/hsa-mir-539/hsa-mir-889/hsa-mir-544a/hsa-mir-655/hsa-mir-487a/hsa-mir…	4	rs115831106	101065469	C > T	0.00116	5	UGGUCGACCAGUUGGAAAGUAAU	UGGUUGACCAGUUGGAAAGUAAU	hsa-miR-412-5p,UGGU[C/U]GACCAGUUGGAAAGUAAU	14	216	2	3.63696
788	hsa-miR-412-5p	chr14	+	hsa-mir-412	Yes (101022070-101066786:42:HHC:hsa-mir-379/hsa-mir-411/hsa-mir-299/hsa-mir-380/hsa-mir-1197/hsa-mir-323a/hsa-mir-758/hsa-mir-329-1/hsa-mir-329-2/hsa-mir-494/hsa-mir-1193/hsa-mir-543/hsa-mir-495/hsa-mir-376c/hsa-mir-376a-2/hsa-mir-654/hsa-mir-376b/hsa-mir-376a-1/hsa-mir-300/hsa-mir-1185-1/hsa-mir-1185-2/hsa-mir-381/hsa-mir-487b/hsa-mir-539/hsa-mir-889/hsa-mir-544a/hsa-mir-655/hsa-mir-487a/hsa-mir…	4	rs748703043	101065466	G > T	1.7e-05	2	UGGUCGACCAGUUGGAAAGUAAU	UUGUCGACCAGUUGGAAAGUAAU	hsa-miR-412-5p,U[G/U]GUCGACCAGUUGGAAAGUAAU	14	13	1	7.41249
788	hsa-miR-412-5p	chr14	+	hsa-mir-412	Yes (101022070-101066786:42:HHC:hsa-mir-379/hsa-mir-411/hsa-mir-299/hsa-mir-380/hsa-mir-1197/hsa-mir-323a/hsa-mir-758/hsa-mir-329-1/hsa-mir-329-2/hsa-mir-494/hsa-mir-1193/hsa-mir-543/hsa-mir-495/hsa-mir-376c/hsa-mir-376a-2/hsa-mir-654/hsa-mir-376b/hsa-mir-376a-1/hsa-mir-300/hsa-mir-1185-1/hsa-mir-1185-2/hsa-mir-381/hsa-mir-487b/hsa-mir-539/hsa-mir-889/hsa-mir-544a/hsa-mir-655/hsa-mir-487a/hsa-mir…	4	rs371868426	101065472	C > A	1.7e-05	8	UGGUCGACCAGUUGGAAAGUAAU	UGGUCGAACAGUUGGAAAGUAAU	hsa-miR-412-5p,UGGUCGA[C/A]CAGUUGGAAAGUAAU	14	15	1	6.90066
788	hsa-miR-412-5p	chr14	+	hsa-mir-412	Yes (101022070-101066786:42:HHC:hsa-mir-379/hsa-mir-411/hsa-mir-299/hsa-mir-380/hsa-mir-1197/hsa-mir-323a/hsa-mir-758/hsa-mir-329-1/hsa-mir-329-2/hsa-mir-494/hsa-mir-1193/hsa-mir-543/hsa-mir-495/hsa-mir-376c/hsa-mir-376a-2/hsa-mir-654/hsa-mir-376b/hsa-mir-376a-1/hsa-mir-300/hsa-mir-1185-1/hsa-mir-1185-2/hsa-mir-381/hsa-mir-487b/hsa-mir-539/hsa-mir-889/hsa-mir-544a/hsa-mir-655/hsa-mir-487a/hsa-mir…	4	rs777368153	101065470	G > A	8e-06	6	UGGUCGACCAGUUGGAAAGUAAU	UGGUCAACCAGUUGGAAAGUAAU	hsa-miR-412-5p,UGGUC[G/A]ACCAGUUGGAAAGUAAU	14	278	0	0
789	hsa-miR-369-5p	chr14	+	hsa-mir-369	Yes (101022070-101066786:42:HHC:hsa-mir-379/hsa-mir-411/hsa-mir-299/hsa-mir-380/hsa-mir-1197/hsa-mir-323a/hsa-mir-758/hsa-mir-329-1/hsa-mir-329-2/hsa-mir-494/hsa-mir-1193/hsa-mir-543/hsa-mir-495/hsa-mir-376c/hsa-mir-376a-2/hsa-mir-654/hsa-mir-376b/hsa-mir-376a-1/hsa-mir-300/hsa-mir-1185-1/hsa-mir-1185-2/hsa-mir-381/hsa-mir-487b/hsa-mir-539/hsa-mir-889/hsa-mir-544a/hsa-mir-655/hsa-mir-487a/hsa-mir…	1	rs772067346	101065611	G > A	8e-06	6	AGAUCGACCGUGUUAUAUUCGC	AGAUCAACCGUGUUAUAUUCGC	hsa-miR-369-5p,AGAUC[G/A]ACCGUGUUAUAUUCGC	17	336	3	3.96942
790	hsa-miR-369-3p	chr14	+	hsa-mir-369	Yes (101022070-101066786:42:HHC:hsa-mir-379/hsa-mir-411/hsa-mir-299/hsa-mir-380/hsa-mir-1197/hsa-mir-323a/hsa-mir-758/hsa-mir-329-1/hsa-mir-329-2/hsa-mir-494/hsa-mir-1193/hsa-mir-543/hsa-mir-495/hsa-mir-376c/hsa-mir-376a-2/hsa-mir-654/hsa-mir-376b/hsa-mir-376a-1/hsa-mir-300/hsa-mir-1185-1/hsa-mir-1185-2/hsa-mir-381/hsa-mir-487b/hsa-mir-539/hsa-mir-889/hsa-mir-544a/hsa-mir-655/hsa-mir-487a/hsa-mir…	0
791	hsa-miR-410-3p	chr14	+	hsa-mir-410	Yes (101022070-101066786:42:HHC:hsa-mir-379/hsa-mir-411/hsa-mir-299/hsa-mir-380/hsa-mir-1197/hsa-mir-323a/hsa-mir-758/hsa-mir-329-1/hsa-mir-329-2/hsa-mir-494/hsa-mir-1193/hsa-mir-543/hsa-mir-495/hsa-mir-376c/hsa-mir-376a-2/hsa-mir-654/hsa-mir-376b/hsa-mir-376a-1/hsa-mir-300/hsa-mir-1185-1/hsa-mir-1185-2/hsa-mir-381/hsa-mir-487b/hsa-mir-539/hsa-mir-889/hsa-mir-544a/hsa-mir-655/hsa-mir-487a/hsa-mir…	1	rs753277476	101065968	C > A	1.7e-05	8	AAUAUAACACAGAUGGCCUGU	AAUAUAAAACAGAUGGCCUGU	hsa-miR-410-3p,AAUAUAA[C/A]ACAGAUGGCCUGU	1694	2798	1420	65.2241
792	hsa-miR-410-5p	chr14	+	hsa-mir-410	Yes (101022070-101066786:42:HHC:hsa-mir-379/hsa-mir-411/hsa-mir-299/hsa-mir-380/hsa-mir-1197/hsa-mir-323a/hsa-mir-758/hsa-mir-329-1/hsa-mir-329-2/hsa-mir-494/hsa-mir-1193/hsa-mir-543/hsa-mir-495/hsa-mir-376c/hsa-mir-376a-2/hsa-mir-654/hsa-mir-376b/hsa-mir-376a-1/hsa-mir-300/hsa-mir-1185-1/hsa-mir-1185-2/hsa-mir-381/hsa-mir-487b/hsa-mir-539/hsa-mir-889/hsa-mir-544a/hsa-mir-655/hsa-mir-487a/hsa-mir…	0
793	hsa-miR-656-3p	chr14	+	hsa-mir-656	Yes (101022070-101066786:42:HHC:hsa-mir-379/hsa-mir-411/hsa-mir-299/hsa-mir-380/hsa-mir-1197/hsa-mir-323a/hsa-mir-758/hsa-mir-329-1/hsa-mir-329-2/hsa-mir-494/hsa-mir-1193/hsa-mir-543/hsa-mir-495/hsa-mir-376c/hsa-mir-376a-2/hsa-mir-654/hsa-mir-376b/hsa-mir-376a-1/hsa-mir-300/hsa-mir-1185-1/hsa-mir-1185-2/hsa-mir-381/hsa-mir-487b/hsa-mir-539/hsa-mir-889/hsa-mir-544a/hsa-mir-655/hsa-mir-487a/hsa-mir…	3	rs767470396	101066773	T > C	1.7e-05	8	AAUAUUAUACAGUCAACCUCU	AAUAUUACACAGUCAACCUCU	hsa-miR-656-3p,AAUAUUA[U/C]ACAGUCAACCUCU	1673	1456	997	63.8802
793	hsa-miR-656-3p	chr14	+	hsa-mir-656	Yes (101022070-101066786:42:HHC:hsa-mir-379/hsa-mir-411/hsa-mir-299/hsa-mir-380/hsa-mir-1197/hsa-mir-323a/hsa-mir-758/hsa-mir-329-1/hsa-mir-329-2/hsa-mir-494/hsa-mir-1193/hsa-mir-543/hsa-mir-495/hsa-mir-376c/hsa-mir-376a-2/hsa-mir-654/hsa-mir-376b/hsa-mir-376a-1/hsa-mir-300/hsa-mir-1185-1/hsa-mir-1185-2/hsa-mir-381/hsa-mir-487b/hsa-mir-539/hsa-mir-889/hsa-mir-544a/hsa-mir-655/hsa-mir-487a/hsa-mir…	3	rs774217405	101066767	A > C	8e-06	2	AAUAUUAUACAGUCAACCUCU	ACUAUUAUACAGUCAACCUCU	hsa-miR-656-3p,A[A/C]UAUUAUACAGUCAACCUCU	1673	736	310	27.9367
793	hsa-miR-656-3p	chr14	+	hsa-mir-656	Yes (101022070-101066786:42:HHC:hsa-mir-379/hsa-mir-411/hsa-mir-299/hsa-mir-380/hsa-mir-1197/hsa-mir-323a/hsa-mir-758/hsa-mir-329-1/hsa-mir-329-2/hsa-mir-494/hsa-mir-1193/hsa-mir-543/hsa-mir-495/hsa-mir-376c/hsa-mir-376a-2/hsa-mir-654/hsa-mir-376b/hsa-mir-376a-1/hsa-mir-300/hsa-mir-1185-1/hsa-mir-1185-2/hsa-mir-381/hsa-mir-487b/hsa-mir-539/hsa-mir-889/hsa-mir-544a/hsa-mir-655/hsa-mir-487a/hsa-mir…	3	rs761669303	101066772	A > G	3.3e-05	7	AAUAUUAUACAGUCAACCUCU	AAUAUUGUACAGUCAACCUCU	hsa-miR-656-3p,AAUAUU[A/G]UACAGUCAACCUCU	1673	782	283	24.742
794	hsa-miR-656-5p	chr14	+	hsa-mir-656	Yes (101022070-101066786:42:HHC:hsa-mir-379/hsa-mir-411/hsa-mir-299/hsa-mir-380/hsa-mir-1197/hsa-mir-323a/hsa-mir-758/hsa-mir-329-1/hsa-mir-329-2/hsa-mir-494/hsa-mir-1193/hsa-mir-543/hsa-mir-495/hsa-mir-376c/hsa-mir-376a-2/hsa-mir-654/hsa-mir-376b/hsa-mir-376a-1/hsa-mir-300/hsa-mir-1185-1/hsa-mir-1185-2/hsa-mir-381/hsa-mir-487b/hsa-mir-539/hsa-mir-889/hsa-mir-544a/hsa-mir-655/hsa-mir-487a/hsa-mir…	0
795	hsa-miR-1247-5p	chr14	-	hsa-mir-1247	No	0
796	hsa-miR-1247-3p	chr14	-	hsa-mir-1247	No	0
797	hsa-miR-4309	chr14	+	hsa-mir-4309	No	1	rs570600995	102539661	C > T	0.0002	8	CUGGAGUCUAGGAUUCCA	CUGGAGUUUAGGAUUCCA	hsa-miR-4309,CUGGAGU[C/U]UAGGAUUCCA	483	516	200	40.0619
798	hsa-miR-203a-3p	chr14	+	hsa-mir-203a	No	0
799	hsa-miR-203a-5p	chr14	+	hsa-mir-203a	No	0
800	hsa-miR-203b-5p	chr14	-	hsa-mir-203b	No	0
801	hsa-miR-203b-3p	chr14	-	hsa-mir-203b	No	0
802	hsa-miR-4710	chr14	-	hsa-mir-4710	No	0
803	hsa-miR-6765-5p	chr14	-	hsa-mir-6765	No	2	rs777325572	105150859	C > T	2.8e-05	6	GUGAGGCGGGGCCAGGAGGGUGUGU	GUGAGACGGGGCCAGGAGGGUGUGU	hsa-miR-6765-5p,GUGAG[G/A]CGGGGCCAGGAGGGUGUGU	172	222	17	8.69978
803	hsa-miR-6765-5p	chr14	-	hsa-mir-6765	No	2	rs368185909	105150858	G > A	0.000101	7	GUGAGGCGGGGCCAGGAGGGUGUGU	GUGAGGUGGGGCCAGGAGGGUGUGU	hsa-miR-6765-5p,GUGAGG[C/U]GGGGCCAGGAGGGUGUGU	172	406	21	7.9468
804	hsa-miR-6765-3p	chr14	-	hsa-mir-6765	No	0
805	hsa-miR-8071	chr14	+	hsa-mir-8071-1	No	0
806	hsa-miR-8071	chr14	+	hsa-mir-8071-2	No	0
807	hsa-miR-4539	chr14	-	hsa-mir-4539	Yes (105857512-105859553:4:hetero:hsa-mir-4539/hsa-mir-4507/hsa-mir-4538/hsa-mir-4537)	2	rs565481385	105857528	G > C	0.0002	7	GCUGAACUGGGCUGAGCUGGGC	GCUGAAGUGGGCUGAGCUGGGC	hsa-miR-4539,GCUGAA[C/G]UGGGCUGAGCUGGGC	543	896	95	13.6198
807	hsa-miR-4539	chr14	-	hsa-mir-4539	Yes (105857512-105859553:4:hetero:hsa-mir-4539/hsa-mir-4507/hsa-mir-4538/hsa-mir-4537)	2	rs532839024	105857531	C > T	0.0002	4	GCUGAACUGGGCUGAGCUGGGC	GCUAAACUGGGCUGAGCUGGGC	hsa-miR-4539,GCU[G/A]AACUGGGCUGAGCUGGGC	543	581	64	11.3944
808	hsa-miR-4507	chr14	-	hsa-mir-4507	Yes (105857512-105859553:4:hetero:hsa-mir-4539/hsa-mir-4507/hsa-mir-4538/hsa-mir-4537)	0
809	hsa-miR-4538	chr14	-	hsa-mir-4538	Yes (105857512-105859553:4:hetero:hsa-mir-4539/hsa-mir-4507/hsa-mir-4538/hsa-mir-4537)	1	rs111207015	105858237	A > C	0.5	6	GAGCUUGGAUGAGCUGGGCUGA	GAGCUGGGAUGAGCUGGGCUGA	hsa-miR-4538,GAGCU[U/G]GGAUGAGCUGGGCUGA	290	978	45	8.44975
810	hsa-miR-4537	chr14	-	hsa-mir-4537	Yes (105857512-105859553:4:hetero:hsa-mir-4539/hsa-mir-4507/hsa-mir-4538/hsa-mir-4537)	2	rs562157419	105859552	C > G	0.000599	2	UGAGCCGAGCUGAGCUUAGCUG	UCAGCCGAGCUGAGCUUAGCUG	hsa-miR-4537,U[G/C]AGCCGAGCUGAGCUUAGCUG	37	32	0	0
810	hsa-miR-4537	chr14	-	hsa-mir-4537	Yes (105857512-105859553:4:hetero:hsa-mir-4539/hsa-mir-4507/hsa-mir-4538/hsa-mir-4537)	2	rs547029685	105859550	C > G	0.000399	4	UGAGCCGAGCUGAGCUUAGCUG	UGACCCGAGCUGAGCUUAGCUG	hsa-miR-4537,UGA[G/C]CCGAGCUGAGCUUAGCUG	37	21	0	0
811	hsa-miR-5195-5p	chr14	-	hsa-mir-5195	No	4	rs563365821	106850957	T > C	0.0002	8	AACCCCUAAGGCAACUGGAUGG	AACCCCUGAGGCAACUGGAUGG	hsa-miR-5195-5p,AACCCCU[A/G]AGGCAACUGGAUGG	205	247	61	27.1084
811	hsa-miR-5195-5p	chr14	-	hsa-mir-5195	No	4	rs552695450	106850961	G > A	0.0002	4	AACCCCUAAGGCAACUGGAUGG	AACUCCUAAGGCAACUGGAUGG	hsa-miR-5195-5p,AAC[C/U]CCUAAGGCAACUGGAUGG	205	342	16	6.04269
811	hsa-miR-5195-5p	chr14	-	hsa-mir-5195	No	4	rs531012313	106850958	A > G	0.0002	7	AACCCCUAAGGCAACUGGAUGG	AACCCCCAAGGCAACUGGAUGG	hsa-miR-5195-5p,AACCCC[U/C]AAGGCAACUGGAUGG	205	448	12	3.95973
811	hsa-miR-5195-5p	chr14	-	hsa-mir-5195	No	4	rs570950090	106850962	G > A	0.000399	3	AACCCCUAAGGCAACUGGAUGG	AAUCCCUAAGGCAACUGGAUGG	hsa-miR-5195-5p,AA[C/U]CCCUAAGGCAACUGGAUGG	205	341	15	5.67332
812	hsa-miR-5195-3p	chr14	-	hsa-mir-5195	No	1	rs548320156	106850928	G > A	0.0002	3	AUCCAGUUCUCUGAGGGGGCU	AUUCAGUUCUCUGAGGGGGCU	hsa-miR-5195-3p,AU[C/U]CAGUUCUCUGAGGGGGCU	854	1378	219	20.1879
813	hsa-miR-3118	chr15	+	hsa-mir-3118-2	No	1	rs370569866	20832843	C > G	0.164634	6	UGUGACUGCAUUAUGAAAAUUCU	UGUGAGUGCAUUAUGAAAAUUCU	hsa-miR-3118,UGUGA[C/G]UGCAUUAUGAAAAUUCU	436	378	32	7.88244
814	hsa-miR-5701	chr15	+	hsa-mir-5701-1	No	0
815	hsa-miR-3118	chr15	+	hsa-mir-3118-3	No	1	rs7167371	21406433	C > G	0.5	6	UGUGACUGCAUUAUGAAAAUUCU	UGUGAGUGCAUUAUGAAAAUUCU	hsa-miR-3118,UGUGA[C/G]UGCAUUAUGAAAAUUCU	436	378	32	7.88244
816	hsa-miR-5701	chr15	+	hsa-mir-5701-2	No	0
817	hsa-miR-3118	chr15	+	hsa-mir-3118-4	No	0
818	hsa-miR-5701	chr15	+	hsa-mir-5701-3	No	0
819	hsa-miR-1268a	chr15	-	hsa-mir-1268a	No	2	rs537950017	22225324	C > T	0.0002	2	CGGGCGUGGUGGUGGGGG	CAGGCGUGGUGGUGGGGG	hsa-miR-1268a,C[G/A]GGCGUGGUGGUGGGGG	59	46	0	0
819	hsa-miR-1268a	chr15	-	hsa-mir-1268a	No	2	rs28599926	22225320	C > T	0.184211	6	CGGGCGUGGUGGUGGGGG	CGGGCAUGGUGGUGGGGG	hsa-miR-1268a,CGGGC[G/A]UGGUGGUGGGGG	59	359	0	0
820	hsa-miR-4509	chr15	+	hsa-mir-4509-1	No	0
821	hsa-miR-4508	chr15	-	hsa-mir-4508	No	0
822	hsa-miR-4715-5p	chr15	-	hsa-mir-4715	No	0
823	hsa-miR-4715-3p	chr15	-	hsa-mir-4715	No	0
824	hsa-miR-4509	chr15	+	hsa-mir-4509-2	No	0
825	hsa-miR-4509	chr15	-	hsa-mir-4509-3	No	0
826	hsa-miR-211-5p	chr15	-	hsa-mir-211	No	0
827	hsa-miR-211-3p	chr15	-	hsa-mir-211	No	0
828	hsa-miR-1233-3p	chr15	-	hsa-mir-1233-1	No	0
829	hsa-miR-1233-5p	chr15	-	hsa-mir-1233-1	No	0
830	hsa-miR-1233-3p	chr15	-	hsa-mir-1233-2	No	0
831	hsa-miR-1233-5p	chr15	-	hsa-mir-1233-2	No	0
832	hsa-miR-3942-5p	chr15	-	hsa-mir-3942	No	0
833	hsa-miR-3942-3p	chr15	-	hsa-mir-3942	No	0
834	hsa-miR-4510	chr15	+	hsa-mir-4510	No	0
835	hsa-miR-8063	chr15	-	hsa-mir-8063	No	0
836	hsa-miR-626	chr15	+	hsa-mir-626	No	0
837	hsa-miR-4310	chr15	-	hsa-mir-4310	No	0
838	hsa-miR-627-5p	chr15	-	hsa-mir-627	No	1	rs2620381	42199650	A > C	0.059271	2	GUGAGUCUCUAAGAAAAGAGGA	GGGAGUCUCUAAGAAAAGAGGA	hsa-miR-627-5p,G[U/G]GAGUCUCUAAGAAAAGAGGA	317	347	15	4.52269
839	hsa-miR-627-3p	chr15	-	hsa-mir-627	No	0
840	hsa-miR-1282	chr15	-	hsa-mir-1282	No	0
841	hsa-miR-147b	chr15	+	hsa-mir-147b	No	2	rs753817843	45433103	C > T	8e-06	6	GUGUGCGGAAAUGCUUCUGCUA	GUGUGUGGAAAUGCUUCUGCUA	hsa-miR-147b,GUGUG[C/U]GGAAAUGCUUCUGCUA	36	932	10	5.45935
841	hsa-miR-147b	chr15	+	hsa-mir-147b	No	2	rs376183261	45433101	T > G	1.7e-05	4	GUGUGCGGAAAUGCUUCUGCUA	GUGGGCGGAAAUGCUUCUGCUA	hsa-miR-147b,GUG[U/G]GCGGAAAUGCUUCUGCUA	36	48	0	0
842	hsa-miR-4716-5p	chr15	-	hsa-mir-4716	No	0
843	hsa-miR-4716-3p	chr15	-	hsa-mir-4716	No	0
844	hsa-miR-4712-5p	chr15	+	hsa-mir-4712	No	0
845	hsa-miR-4712-3p	chr15	+	hsa-mir-4712	No	0
846	hsa-miR-4713-5p	chr15	+	hsa-mir-4713	No	1	rs564915684	51242207	A > G	0.0002	8	UUCUCCCACUACCAGGCUCCCA	UUCUCCCGCUACCAGGCUCCCA	hsa-miR-4713-5p,UUCUCCC[A/G]CUACCAGGCUCCCA	816	393	309	54.5654
847	hsa-miR-4713-3p	chr15	+	hsa-mir-4713	No	0
848	hsa-miR-7973	chr15	-	hsa-mir-7973-2	No	0
849	hsa-miR-7973	chr15	+	hsa-mir-7973-1	No	1	rs549183896	51314039	C > A	0.000399	6	UGUGACCCUAGAAUAAUUAC	UGUGAACCUAGAAUAAUUAC	hsa-miR-7973,UGUGA[C/A]CCUAGAAUAAUUAC	270	297	14	4.94388
850	hsa-miR-1266-5p	chr15	-	hsa-mir-1266	No	2	rs768512100	52277187	G > C	8e-06	2	CCUCAGGGCUGUAGAACAGGGCU	CGUCAGGGCUGUAGAACAGGGCU	hsa-miR-1266-5p,C[C/G]UCAGGGCUGUAGAACAGGGCU	700	396	64	12.1558
850	hsa-miR-1266-5p	chr15	-	hsa-mir-1266	No	2	rs746719581	52277185	G > A	0.000187	4	CCUCAGGGCUGUAGAACAGGGCU	CCUUAGGGCUGUAGAACAGGGCU	hsa-miR-1266-5p,CCU[C/U]AGGGCUGUAGAACAGGGCU	700	307	31	6.68719
851	hsa-miR-1266-3p	chr15	-	hsa-mir-1266	No	1	rs372226863	52277148	C > T	0.000411	5	CCCUGUUCUAUGCCCUGAGGGA	CCCUAUUCUAUGCCCUGAGGGA	hsa-miR-1266-3p,CCCU[G/A]UUCUAUGCCCUGAGGGA	490	442	44	9.45461
852	hsa-miR-628-5p	chr15	-	hsa-mir-628	No	1	rs761527552	55373005	G > A	8e-06	8	AUGCUGACAUAUUUACUAGAGG	AUGCUGAUAUAUUUACUAGAGG	hsa-miR-628-5p,AUGCUGA[C/U]AUAUUUACUAGAGG	551	561	248	44.6061
853	hsa-miR-628-3p	chr15	-	hsa-mir-628	No	0
854	hsa-miR-2116-5p	chr15	-	hsa-mir-2116	No	0
855	hsa-miR-2116-3p	chr15	-	hsa-mir-2116	No	0
856	hsa-miR-8067	chr15	-	hsa-mir-8067	No	0
857	hsa-miR-6085	chr15	+	hsa-mir-6085	No	0
858	hsa-miR-190a-5p	chr15	+	hsa-mir-190a	No	0
859	hsa-miR-190a-3p	chr15	+	hsa-mir-190a	No	1	rs771043955	62824015	T > C	1.1e-05	8	CUAUAUAUCAAACAUAUUCCU	CUAUAUACCAAACAUAUUCCU	hsa-miR-190a-3p,CUAUAUA[U/C]CAAACAUAUUCCU	2422	2220	1716	74.0037
860	hsa-miR-422a	chr15	-	hsa-mir-422a	No	2	rs765174411	63871008	A > C	8e-06	3	ACUGGACUUAGGGUCAGAAGGC	ACGGGACUUAGGGUCAGAAGGC	hsa-miR-422a,AC[U/G]GGACUUAGGGUCAGAAGGC	374	26	0	0
860	hsa-miR-422a	chr15	-	hsa-mir-422a	No	2	rs372682021	63871006	C > T	8e-06	5	ACUGGACUUAGGGUCAGAAGGC	ACUGAACUUAGGGUCAGAAGGC	hsa-miR-422a,ACUG[G/A]ACUUAGGGUCAGAAGGC	374	543	43	9.54185
861	hsa-miR-1272	chr15	-	hsa-mir-1272	No	1	rs758065584	64762489	T > A	2.5e-05	8	GAUGAUGAUGGCAGCAAAUUCUGAAA	GAUGAUGUUGGCAGCAAAUUCUGAAA	hsa-miR-1272,GAUGAUG[A/U]UGGCAGCAAAUUCUGAAA	580	520	201	36.5999
862	hsa-miR-4511	chr15	-	hsa-mir-4511	No	0
863	hsa-miR-4311	chr15	+	hsa-mir-4311	No	0
864	hsa-miR-4512	chr15	-	hsa-mir-4512	No	0
865	hsa-miR-4312	chr15	-	hsa-mir-4312	No	0
866	hsa-miR-629-5p	chr15	-	hsa-mir-629	No	1	rs758022155	70079444	C > A	1e-05	4	UGGGUUUACGUUGGGAGAACU	UGGUUUUACGUUGGGAGAACU	hsa-miR-629-5p,UGG[G/U]UUUACGUUGGGAGAACU	512	1157	150	19.489
867	hsa-miR-629-3p	chr15	-	hsa-mir-629	No	1	rs557636399	70079401	G > C	7.6e-05	8	GUUCUCCCAACGUAAGCCCAGC	GUUCUCCGAACGUAAGCCCAGC	hsa-miR-629-3p,GUUCUCC[C/G]AACGUAAGCCCAGC	1138	562	499	62.3966
868	hsa-miR-630	chr15	+	hsa-mir-630	No	0
869	hsa-miR-6881-5p	chr15	-	hsa-mir-6881	No	2	rs751798959	74411424	C > G	1e-05	4	UGGGGUAAGGAUAGGAGGGUCA	UGGCGUAAGGAUAGGAGGGUCA	hsa-miR-6881-5p,UGG[G/C]GUAAGGAUAGGAGGGUCA	255	19	0	0
869	hsa-miR-6881-5p	chr15	-	hsa-mir-6881	No	2	rs752883889	74411423	C > T	9.8e-05	5	UGGGGUAAGGAUAGGAGGGUCA	UGGGAUAAGGAUAGGAGGGUCA	hsa-miR-6881-5p,UGGG[G/A]UAAGGAUAGGAGGGUCA	255	328	18	6.22394
870	hsa-miR-6881-3p	chr15	-	hsa-mir-6881	No	0
871	hsa-miR-4513	chr15	-	hsa-mir-4513	No	0
872	hsa-miR-6882-5p	chr15	-	hsa-mir-6882	No	0
873	hsa-miR-6882-3p	chr15	-	hsa-mir-6882	No	0
874	hsa-miR-631	chr15	-	hsa-mir-631	No	0
875	hsa-miR-4313	chr15	-	hsa-mir-4313	No	0
876	hsa-miR-3713	chr15	+	hsa-mir-3713	No	0
877	hsa-miR-184	chr15	+	hsa-mir-184	No	0
878	hsa-miR-5572	chr15	+	hsa-mir-5572	No	1	rs778246346	80581184	G > T	9e-06	6	GUUGGGGUGCAGGGGUCUGCU	GUUGGUGUGCAGGGGUCUGCU	hsa-miR-5572,GUUGG[G/U]GUGCAGGGGUCUGCU	580	540	57	10.1851
879	hsa-miR-549a	chr15	-	hsa-mir-549a	No	0
880	hsa-miR-4514	chr15	-	hsa-mir-4514	No	0
881	hsa-miR-4515	chr15	+	hsa-mir-4515	No	0
882	hsa-miR-7706	chr15	+	hsa-mir-7706	No	1	rs549230124	85380646	C > G	0.0002	8	UGAAGCGCCUGUGCUCUGCCGAGA	UGAAGCGGCUGUGCUCUGCCGAGA	hsa-miR-7706,UGAAGCG[C/G]CUGUGCUCUGCCGAGA	40	41	1	2.46932
883	hsa-miR-1276	chr15	-	hsa-mir-1276	No	3	rs750237476	85770564	T > C	9e-06	4	UAAAGAGCCCUGUGGAGACA	UAAGGAGCCCUGUGGAGACA	hsa-miR-1276,UAA[A/G]GAGCCCUGUGGAGACA	1043	624	161	19.9568
883	hsa-miR-1276	chr15	-	hsa-mir-1276	No	3	rs769744052	85770560	G > A	9e-06	8	UAAAGAGCCCUGUGGAGACA	UAAAGAGUCCUGUGGAGACA	hsa-miR-1276,UAAAGAG[C/U]CCUGUGGAGACA	1043	1093	613	57.4127
883	hsa-miR-1276	chr15	-	hsa-mir-1276	No	3	rs764239400	85770562	T > C	9e-06	6	UAAAGAGCCCUGUGGAGACA	UAAAGGGCCCUGUGGAGACA	hsa-miR-1276,UAAAG[A/G]GCCCUGUGGAGACA	1043	730	171	19.5971
884	hsa-miR-548ap-5p	chr15	+	hsa-mir-548ap	No	1	rs186097449	85825659	G > C	0.000599	5	AAAAGUAAUUGCGGUCUUU	AAAACUAAUUGCGGUCUUU	hsa-miR-548ap-5p,AAAA[G/C]UAAUUGCGGUCUUU	1737	1374	537	34.7601
885	hsa-miR-548ap-3p	chr15	+	hsa-mir-548ap	No	1	rs150751643	85825698	C > A	0.000399	7	AAAAACCACAAUUACUUUU	AAAAACAACAAUUACUUUU	hsa-miR-548ap-3p,AAAAAC[C/A]ACAAUUACUUUU	1885	4281	1236	43.5101
886	hsa-miR-1179	chr15	+	hsa-mir-1179	Yes (88608120-88611917:2:hetero:hsa-mir-1179/hsa-mir-7-2)	1	rs568494694	88608123	G > A	2.4e-05	3	AAGCAUUCUUUCAUUGGUUGG	AAACAUUCUUUCAUUGGUUGG	hsa-miR-1179,AA[G/A]CAUUCUUUCAUUGGUUGG	772	1692	306	26.774
887	hsa-miR-7-5p	chr15	+	hsa-mir-7-2	Yes (88608120-88611917:2:hetero:hsa-mir-1179/hsa-mir-7-2)	0
888	hsa-miR-7-2-3p	chr15	+	hsa-mir-7-2	Yes (88608120-88611917:2:hetero:hsa-mir-1179/hsa-mir-7-2)	1	rs748388180	88611897	A > G	1.3e-05	2	CAACAAAUCCCAGUCUACCUAA	CGACAAAUCCCAGUCUACCUAA	hsa-miR-7-2-3p,C[A/G]ACAAAUCCCAGUCUACCUAA	2797	1039	542	31.794
889	hsa-miR-3529-5p	chr15	-	hsa-mir-3529	Yes (88608120-88611917:2:hetero:hsa-mir-1179/hsa-mir-7-2)	1	rs777738449	88611914	C > A	2.8e-05	2	AGGUAGACUGGGAUUUGUUGUU	AUGUAGACUGGGAUUUGUUGUU	hsa-miR-3529-5p,A[G/U]GUAGACUGGGAUUUGUUGUU	203	394	21	7.42546
890	hsa-miR-3529-3p	chr15	-	hsa-mir-3529	Yes (88608120-88611917:2:hetero:hsa-mir-1179/hsa-mir-7-2)	1	rs761252497	88611877	G > T	1.2e-05	3	AACAACAAAAUCACUAGUCUUCCA	AAAAACAAAAUCACUAGUCUUCCA	hsa-miR-3529-3p,AA[C/A]AACAAAAUCACUAGUCUUCCA	1422	4281	953	38.6252
891	hsa-miR-6766-5p	chr15	-	hsa-mir-6766	No	2	rs753263530	89326804	C > T	8e-06	2	CGGGUGGGAGCAGAUCUUAUUGAG	CAGGUGGGAGCAGAUCUUAUUGAG	hsa-miR-6766-5p,C[G/A]GGUGGGAGCAGAUCUUAUUGAG	991	541	140	19.1202
891	hsa-miR-6766-5p	chr15	-	hsa-mir-6766	No	2	rs765900559	89326801	A > G	8e-06	5	CGGGUGGGAGCAGAUCUUAUUGAG	CGGGCGGGAGCAGAUCUUAUUGAG	hsa-miR-6766-5p,CGGG[U/C]GGGAGCAGAUCUUAUUGAG	991	177	57	13.6098
892	hsa-miR-6766-3p	chr15	-	hsa-mir-6766	No	1	rs768707883	89326758	C > T	8e-06	6	UGAUUGUCUUCCCCCACCCUCA	UGAUUAUCUUCCCCCACCCUCA	hsa-miR-6766-3p,UGAUU[G/A]UCUUCCCCCACCCUCA	297	488	37	9.71882
893	hsa-miR-9-5p	chr15	+	hsa-mir-9-3	No	0
894	hsa-miR-9-3p	chr15	+	hsa-mir-9-3	No	0
895	hsa-miR-5094	chr15	-	hsa-mir-5094	No	0
896	hsa-miR-5009-5p	chr15	-	hsa-mir-5009	No	0
897	hsa-miR-5009-3p	chr15	-	hsa-mir-5009	No	0
898	hsa-miR-3174	chr15	+	hsa-mir-3174	No	0
899	hsa-miR-3175	chr15	+	hsa-mir-3175	No	1	rs563454166	92904413	A > G	0.004992	6	CGGGGAGAGAACGCAGUGACGU	CGGGGGGAGAACGCAGUGACGU	hsa-miR-3175,CGGGG[A/G]GAGAACGCAGUGACGU	1088	645	176	21.0096
900	hsa-miR-1469	chr15	+	hsa-mir-1469	No	1	rs540212013	96333267	G > C	0.008962	7	CUCGGCGCGGGGCGCGGGCUCC	CUCGGCCCGGGGCGCGGGCUCC	hsa-miR-1469,CUCGGC[G/C]CGGGGCGCGGGCUCC	4	43	0	0
901	hsa-miR-4714-5p	chr15	+	hsa-mir-4714	No	0
902	hsa-miR-4714-3p	chr15	+	hsa-mir-4714	No	0
903	hsa-miR-1302	chr15	-	hsa-mir-1302-10	No	0
904	hsa-miR-6859-5p	chr15	+	hsa-mir-6859-3	No	0
905	hsa-miR-6859-3p	chr15	+	hsa-mir-6859-3	No	0
906	hsa-miR-6859-5p	chr16	-	hsa-mir-6859-4	No	0
907	hsa-miR-6859-3p	chr16	-	hsa-mir-6859-4	No	2	rs749488123	17068	G > A	0.000133	7	UGACCCCCAUGUCGCCUCUGUAG	UGACCCUCAUGUCGCCUCUGUAG	hsa-miR-6859-3p,UGACCC[C/U]CAUGUCGCCUCUGUAG	309	260	21	7.40889
907	hsa-miR-6859-3p	chr16	-	hsa-mir-6859-4	No	2	rs755286844	17069	G > T	6.7e-05	6	UGACCCCCAUGUCGCCUCUGUAG	UGACCACCAUGUCGCCUCUGUAG	hsa-miR-6859-3p,UGACC[C/A]CCAUGUCGCCUCUGUAG	309	271	13	4.49241
908	hsa-miR-5587-5p	chr16	+	hsa-mir-5587	Yes (535315-543354:2:hetero:hsa-mir-5587/hsa-mir-3176)	0
909	hsa-miR-5587-3p	chr16	+	hsa-mir-5587	Yes (535315-543354:2:hetero:hsa-mir-5587/hsa-mir-3176)	1	rs558030490	535352	C > T	0.0002	5	GCCCCGGGCAGUGUGAUCAUC	GCCCUGGGCAGUGUGAUCAUC	hsa-miR-5587-3p,GCCC[C/U]GGGCAGUGUGAUCAUC	100	920	27	8.90164
910	hsa-miR-3176	chr16	+	hsa-mir-3176	Yes (535315-543354:2:hetero:hsa-mir-5587/hsa-mir-3176)	0
911	hsa-miR-662	chr16	+	hsa-mir-662	No	4	rs771424473	770250	T > C	1.1e-05	8	UCCCACGUUGUGGCCCAGCAG	UCCCACGCUGUGGCCCAGCAG	hsa-miR-662,UCCCACG[U/C]UGUGGCCCAGCAG	89	86	9	10.2872
911	hsa-miR-662	chr16	+	hsa-mir-662	No	4	rs9745376	770249	G > A	0.054313	7	UCCCACGUUGUGGCCCAGCAG	UCCCACAUUGUGGCCCAGCAG	hsa-miR-662,UCCCAC[G/A]UUGUGGCCCAGCAG	89	636	10	4.20316
911	hsa-miR-662	chr16	+	hsa-mir-662	No	4	rs748927219	770246	C > T	2.2e-05	4	UCCCACGUUGUGGCCCAGCAG	UCCUACGUUGUGGCCCAGCAG	hsa-miR-662,UCC[C/U]ACGUUGUGGCCCAGCAG	89	36	0	0
911	hsa-miR-662	chr16	+	hsa-mir-662	No	4	rs779711046	770244	C > T	1.1e-05	2	UCCCACGUUGUGGCCCAGCAG	UUCCACGUUGUGGCCCAGCAG	hsa-miR-662,U[C/U]CCACGUUGUGGCCCAGCAG	89	77	1	1.20798
912	hsa-miR-3177-3p	chr16	+	hsa-mir-3177	No	1	rs555543222	1735041	A > G	0.000399	4	UGCACGGCACUGGGGACACGU	UGCGCGGCACUGGGGACACGU	hsa-miR-3177-3p,UGC[A/G]CGGCACUGGGGACACGU	63	31	0	0
913	hsa-miR-3177-5p	chr16	+	hsa-mir-3177	No	0
914	hsa-miR-1225-5p	chr16	-	hsa-mir-1225	No	1	rs761540241	2090282	C > G	9e-06	3	GUGGGUACGGCCCAGUGGGGGG	GUCGGUACGGCCCAGUGGGGGG	hsa-miR-1225-5p,GU[G/C]GGUACGGCCCAGUGGGGGG	263	34	2	2.11501
915	hsa-miR-1225-3p	chr16	-	hsa-mir-1225	No	1	rs765015291	2090210	G > C	9e-06	7	UGAGCCCCUGUGCCGCCCCCAG	UGAGCCGCUGUGCCGCCCCCAG	hsa-miR-1225-3p,UGAGCC[C/G]CUGUGCCGCCCCCAG	389	38	3	2.46749
916	hsa-miR-6511b-5p	chr16	-	hsa-mir-6511b-1	No	0
917	hsa-miR-6511b-3p	chr16	-	hsa-mir-6511b-1	No	2	rs551972801	2106696	G > C	8.5e-05	6	CCUCACCACCCCUUCUGCCUGCA	CCUCAGCACCCCUUCUGCCUGCA	hsa-miR-6511b-3p,CCUCA[C/G]CACCCCUUCUGCCUGCA	439	494	42	9.0189
917	hsa-miR-6511b-3p	chr16	-	hsa-mir-6511b-1	No	2	rs745502224	2106697	T > A	6.3e-05	5	CCUCACCACCCCUUCUGCCUGCA	CCUCUCCACCCCUUCUGCCUGCA	hsa-miR-6511b-3p,CCUC[A/U]CCACCCCUUCUGCCUGCA	439	899	77	12.2568
918	hsa-miR-4516	chr16	+	hsa-mir-4516	No	0
919	hsa-miR-3180	chr16	-	hsa-mir-3180-5	No	0
920	hsa-miR-3677-3p	chr16	+	hsa-mir-3677	Yes (2270714-2274681:3:hetero:hsa-mir-3677/hsa-mir-940/hsa-mir-4717)	1	rs138871259	2270754	G > A	0.000399	4	CUCGUGGGCUCUGGCCACGGCC	CUCAUGGGCUCUGGCCACGGCC	hsa-miR-3677-3p,CUC[G/A]UGGGCUCUGGCCACGGCC	54	436	7	4.56203
921	hsa-miR-3677-5p	chr16	+	hsa-mir-3677	Yes (2270714-2274681:3:hetero:hsa-mir-3677/hsa-mir-940/hsa-mir-4717)	0
922	hsa-miR-940	chr16	+	hsa-mir-940	Yes (2270714-2274681:3:hetero:hsa-mir-3677/hsa-mir-940/hsa-mir-4717)	2	rs754447586	2271810	C > T	1.1e-05	5	AAGGCAGGGCCCCCGCUCCCC	AAGGUAGGGCCCCCGCUCCCC	hsa-miR-940,AAGG[C/U]AGGGCCCCCGCUCCCC	1024	279	56	10.477
922	hsa-miR-940	chr16	+	hsa-mir-940	Yes (2270714-2274681:3:hetero:hsa-mir-3677/hsa-mir-940/hsa-mir-4717)	2	rs149527765	2271808	G > A	2e-05	3	AAGGCAGGGCCCCCGCUCCCC	AAAGCAGGGCCCCCGCUCCCC	hsa-miR-940,AA[G/A]GCAGGGCCCCCGCUCCCC	1024	755	149	16.9458
923	hsa-miR-4717-5p	chr16	+	hsa-mir-4717	Yes (2270714-2274681:3:hetero:hsa-mir-3677/hsa-mir-940/hsa-mir-4717)	0
924	hsa-miR-4717-3p	chr16	+	hsa-mir-4717	Yes (2270714-2274681:3:hetero:hsa-mir-3677/hsa-mir-940/hsa-mir-4717)	0
925	hsa-miR-6767-5p	chr16	+	hsa-mir-6767	No	3	rs781152137	2445401	A > C	9e-06	5	UCGCAGACAGGGACACAUGGAGA	UCGCCGACAGGGACACAUGGAGA	hsa-miR-6767-5p,UCGC[A/C]GACAGGGACACAUGGAGA	31	4	0	0
925	hsa-miR-6767-5p	chr16	+	hsa-mir-6767	No	3	rs754757995	2445399	G > A	8.1e-05	3	UCGCAGACAGGGACACAUGGAGA	UCACAGACAGGGACACAUGGAGA	hsa-miR-6767-5p,UC[G/A]CAGACAGGGACACAUGGAGA	31	1113	3	1.61508
925	hsa-miR-6767-5p	chr16	+	hsa-mir-6767	No	3	rs113675906	2445398	C > T	0.000208	2	UCGCAGACAGGGACACAUGGAGA	UUGCAGACAGGGACACAUGGAGA	hsa-miR-6767-5p,U[C/U]GCAGACAGGGACACAUGGAGA	31	599	5	3.66924
926	hsa-miR-6767-3p	chr16	+	hsa-mir-6767	No	1	rs368889723	2445440	G > A	2.5e-05	5	CCACGUGCUUCUCUUUCCGCAG	CCACAUGCUUCUCUUUCCGCAG	hsa-miR-6767-3p,CCAC[G/A]UGCUUCUCUUUCCGCAG	101	717	19	7.06047
927	hsa-miR-6768-5p	chr16	+	hsa-mir-6768	No	0
928	hsa-miR-6768-3p	chr16	+	hsa-mir-6768	No	3	rs375499936	2464013	A > G	1e-05	3	CAAAGGCCACAUUCUCCUGUGCAC	CAGAGGCCACAUUCUCCUGUGCAC	hsa-miR-6768-3p,CA[A/G]AGGCCACAUUCUCCUGUGCAC	728	535	80	12.8188
928	hsa-miR-6768-3p	chr16	+	hsa-mir-6768	No	3	rs757893316	2464017	C > G	3.8e-05	7	CAAAGGCCACAUUCUCCUGUGCAC	CAAAGGGCACAUUCUCCUGUGCAC	hsa-miR-6768-3p,CAAAGG[C/G]CACAUUCUCCUGUGCAC	728	730	130	17.8327
928	hsa-miR-6768-3p	chr16	+	hsa-mir-6768	No	3	rs754371523	2464016	G > C	9e-06	6	CAAAGGCCACAUUCUCCUGUGCAC	CAAAGCCCACAUUCUCCUGUGCAC	hsa-miR-6768-3p,CAAAG[G/C]CCACAUUCUCCUGUGCAC	728	684	109	15.4466
929	hsa-miR-3178	chr16	-	hsa-mir-3178	No	1	rs532000967	2531991	G > T	0.0002	5	GGGGCGCGGCCGGAUCG	GGGGAGCGGCCGGAUCG	hsa-miR-3178,GGGG[C/A]GCGGCCGGAUCG	32	204	2	2.47537
930	hsa-miR-6126	chr16	-	hsa-mir-6126	No	0
931	hsa-miR-6769a-5p	chr16	+	hsa-mir-6769a	No	1	rs771547820	4671329	G > T	9e-06	7	AGGUGGGUAUGGAGGAGCCCU	AGGUGGUUAUGGAGGAGCCCU	hsa-miR-6769a-5p,AGGUGG[G/U]UAUGGAGGAGCCCU	732	443	52	9.13158
932	hsa-miR-6769a-3p	chr16	+	hsa-mir-6769a	No	2	rs779432863	4671376	C > T	1.7e-05	7	GAGCCCCUCUCUGCUCUCCAG	GAGCCCUUCUCUGCUCUCCAG	hsa-miR-6769a-3p,GAGCCC[C/U]UCUCUGCUCUCCAG	348	407	35	9.29996
932	hsa-miR-6769a-3p	chr16	+	hsa-mir-6769a	No	2	rs758008974	4671375	C > G	8e-06	6	GAGCCCCUCUCUGCUCUCCAG	GAGCCGCUCUCUGCUCUCCAG	hsa-miR-6769a-3p,GAGCC[C/G]CUCUCUGCUCUCCAG	348	31	2	1.92557
933	hsa-miR-8065	chr16	+	hsa-mir-8065	No	1	rs190290362	5632536	A > G	0.0002	4	UGUAGGAACAGUUGAAUUUUGGCU	UGUGGGAACAGUUGAAUUUUGGCU	hsa-miR-8065,UGU[A/G]GGAACAGUUGAAUUUUGGCU	455	611	41	7.77602
934	hsa-miR-548h-5p	chr16	-	hsa-mir-548h-2	No	0
935	hsa-miR-4718	chr16	+	hsa-mir-4718	No	0
936	hsa-miR-193b-5p	chr16	+	hsa-mir-193b	Yes (14303979-14309361:2:hetero:hsa-mir-193b/hsa-mir-365a)	1	rs769824339	14303981	G > C	3.3e-05	2	CGGGGUUUUGAGGGCGAGAUGA	CCGGGUUUUGAGGGCGAGAUGA	hsa-miR-193b-5p,C[G/C]GGGUUUUGAGGGCGAGAUGA	468	40	1	0.730882
937	hsa-miR-193b-3p	chr16	+	hsa-mir-193b	Yes (14303979-14309361:2:hetero:hsa-mir-193b/hsa-mir-365a)	1	rs775353503	14304018	A > G	8e-06	2	AACUGGCCCUCAAAGUCCCGCU	AGCUGGCCCUCAAAGUCCCGCU	hsa-miR-193b-3p,A[A/G]CUGGCCCUCAAAGUCCCGCU	364	546	39	8.74818
938	hsa-miR-365a-3p	chr16	+	hsa-mir-365a	Yes (14303979-14309361:2:hetero:hsa-mir-193b/hsa-mir-365a)	1	rs753261308	14309347	C > T	8e-06	8	UAAUGCCCCUAAAAAUCCUUAU	UAAUGCCUCUAAAAAUCCUUAU	hsa-miR-365a-3p,UAAUGCC[C/U]CUAAAAAUCCUUAU	409	522	168	36.359
939	hsa-miR-365a-5p	chr16	+	hsa-mir-365a	Yes (14303979-14309361:2:hetero:hsa-mir-193b/hsa-mir-365a)	1	rs773834113	14309301	G > C	8e-06	2	AGGGACUUUUGGGGGCAGAUGUG	ACGGACUUUUGGGGGCAGAUGUG	hsa-miR-365a-5p,A[G/C]GGACUUUUGGGGGCAGAUGUG	277	19	1	1.37843
940	hsa-miR-3179	chr16	+	hsa-mir-3179-1	Yes (14901558-14911302:3:hetero:hsa-mir-3179-1/hsa-mir-3670-1/hsa-mir-3180-1)	0
941	hsa-miR-3670	chr16	+	hsa-mir-3670-1	Yes (14901558-14911302:3:hetero:hsa-mir-3179-1/hsa-mir-3670-1/hsa-mir-3180-1)	0
942	hsa-miR-3180-5p	chr16	+	hsa-mir-3180-1	Yes (14901558-14911302:3:hetero:hsa-mir-3179-1/hsa-mir-3670-1/hsa-mir-3180-1)	0
943	hsa-miR-3180-3p	chr16	+	hsa-mir-3180-1	Yes (14901558-14911302:3:hetero:hsa-mir-3179-1/hsa-mir-3670-1/hsa-mir-3180-1)	0
944	hsa-miR-6511a-5p	chr16	+	hsa-mir-6511a-1	Yes (14925940-14930879:2:hetero:hsa-mir-6511a/hsa-mir-6770)	0
945	hsa-miR-6511a-3p	chr16	+	hsa-mir-6511a-1	Yes (14925940-14930879:2:hetero:hsa-mir-6511a/hsa-mir-6770)	0
946	hsa-miR-6770-5p	chr16	+	hsa-mir-6770-1	Yes (14925940-14930879:2:hetero:hsa-mir-6511a/hsa-mir-6770)	0
947	hsa-miR-6770-3p	chr16	+	hsa-mir-6770-1	Yes (14925940-14930879:2:hetero:hsa-mir-6511a/hsa-mir-6770)	0
948	hsa-miR-1972	chr16	-	hsa-mir-1972-1	No	0
949	hsa-miR-6511b-5p	chr16	-	hsa-mir-6511b-2	No	0
950	hsa-miR-6511b-3p	chr16	-	hsa-mir-6511b-2	No	1	rs538162642	15134093	G > A	0.000708	6	CCUCACCACCCCUUCUGCCUGCA	CCUCAUCACCCCUUCUGCCUGCA	hsa-miR-6511b-3p,CCUCA[C/U]CACCCCUUCUGCCUGCA	439	494	42	9.0189
951	hsa-miR-3180	chr16	-	hsa-mir-3180-4	No	0
952	hsa-miR-6506-5p	chr16	-	hsa-mir-6506	No	1	rs781637855	15611093	G > A	1.7e-05	2	ACUGGGAUGUCACUGAAUAUGGU	AUUGGGAUGUCACUGAAUAUGGU	hsa-miR-6506-5p,A[C/U]UGGGAUGUCACUGAAUAUGGU	903	588	94	12.9002
953	hsa-miR-6506-3p	chr16	-	hsa-mir-6506	No	2	rs762560820	15611045	T > C	8e-06	8	UCGUAUCAGAGAUUCCAGACAC	UCGUAUCGGAGAUUCCAGACAC	hsa-miR-6506-3p,UCGUAUC[A/G]GAGAUUCCAGACAC	47	6	1	5.95491
953	hsa-miR-6506-3p	chr16	-	hsa-mir-6506	No	2	rs368752613	15611051	G > A	2.5e-05	2	UCGUAUCAGAGAUUCCAGACAC	UUGUAUCAGAGAUUCCAGACAC	hsa-miR-6506-3p,U[C/U]GUAUCAGAGAUUCCAGACAC	47	533	9	5.6863
954	hsa-miR-484	chr16	+	hsa-mir-484	No	0
955	hsa-miR-3179	chr16	+	hsa-mir-3179-2	Yes (16300209-16309957:3:hetero:hsa-mir-3179-2/hsa-mir-3670-2/hsa-mir-3180-2)	0
956	hsa-miR-3670	chr16	+	hsa-mir-3670-2	Yes (16300209-16309957:3:hetero:hsa-mir-3179-2/hsa-mir-3670-2/hsa-mir-3180-2)	0
957	hsa-miR-3180-5p	chr16	+	hsa-mir-3180-2	Yes (16300209-16309957:3:hetero:hsa-mir-3179-2/hsa-mir-3670-2/hsa-mir-3180-2)	0
958	hsa-miR-3180-3p	chr16	+	hsa-mir-3180-2	Yes (16300209-16309957:3:hetero:hsa-mir-3179-2/hsa-mir-3670-2/hsa-mir-3180-2)	0
959	hsa-miR-6511a-5p	chr16	+	hsa-mir-6511a-2	Yes (16324591-16329364:2:hetero:hsa-mir-6511a/hsa-mir-6770)	0
960	hsa-miR-6511a-3p	chr16	+	hsa-mir-6511a-2	Yes (16324591-16329364:2:hetero:hsa-mir-6511a/hsa-mir-6770)	0
961	hsa-miR-6770-5p	chr16	+	hsa-mir-6770-2	Yes (16324591-16329364:2:hetero:hsa-mir-6511a/hsa-mir-6770)	0
962	hsa-miR-6770-3p	chr16	+	hsa-mir-6770-2	Yes (16324591-16329364:2:hetero:hsa-mir-6511a/hsa-mir-6770)	0
963	hsa-miR-6511a-5p	chr16	+	hsa-mir-6511a-3	No	0
964	hsa-miR-6511a-3p	chr16	+	hsa-mir-6511a-3	No	0
965	hsa-miR-6511a-5p	chr16	-	hsa-mir-6511a-4	No	0
966	hsa-miR-6511a-3p	chr16	-	hsa-mir-6511a-4	No	0
967	hsa-miR-6770-5p	chr16	-	hsa-mir-6770-3	No	0
968	hsa-miR-6770-3p	chr16	-	hsa-mir-6770-3	No	0
969	hsa-miR-3180-5p	chr16	-	hsa-mir-3180-3	Yes (18402188-18411926:3:hetero:hsa-mir-3180-3/hsa-mir-3670-3/hsa-mir-3179-3)	0
970	hsa-miR-3180-3p	chr16	-	hsa-mir-3180-3	Yes (18402188-18411926:3:hetero:hsa-mir-3180-3/hsa-mir-3670-3/hsa-mir-3179-3)	0
971	hsa-miR-3670	chr16	-	hsa-mir-3670-3	Yes (18402188-18411926:3:hetero:hsa-mir-3180-3/hsa-mir-3670-3/hsa-mir-3179-3)	0
972	hsa-miR-3179	chr16	-	hsa-mir-3179-3	Yes (18402188-18411926:3:hetero:hsa-mir-3180-3/hsa-mir-3670-3/hsa-mir-3179-3)	0
973	hsa-miR-3670	chr16	-	hsa-mir-3670-4	Yes (18488302-18494525:2:hetero:hsa-mir-3670/hsa-mir-3179)	0
974	hsa-miR-3179	chr16	-	hsa-mir-3179-4	Yes (18488302-18494525:2:hetero:hsa-mir-3670/hsa-mir-3179)	0
975	hsa-miR-3680-5p	chr16	-	hsa-mir-3680-1	No	1	rs539479172	21506116	G > A	0.0002	7	GACUCACUCACAGGAUUGUGCA	GACUCAUUCACAGGAUUGUGCA	hsa-miR-3680-5p,GACUCA[C/U]UCACAGGAUUGUGCA	306	660	56	12.4611
976	hsa-miR-3680-3p	chr16	-	hsa-mir-3680-1	No	0
977	hsa-miR-1273h-5p	chr16	+	hsa-mir-1273h	No	0
978	hsa-miR-1273h-3p	chr16	+	hsa-mir-1273h	No	0
979	hsa-miR-548w	chr16	+	hsa-mir-548w	No	1	rs573018690	26025249	A > G	0.0002	4	AAAAGUAACUGCGGUUUUUGCCU	AAAGGUAACUGCGGUUUUUGCCU	hsa-miR-548w,AAA[A/G]GUAACUGCGGUUUUUGCCU	1737	765	283	24.5502
980	hsa-miR-6862-5p	chr16	-	hsa-mir-6862-1	No	0
981	hsa-miR-6862-3p	chr16	-	hsa-mir-6862-1	No	0
982	hsa-miR-6862-5p	chr16	+	hsa-mir-6862-2	No	0
983	hsa-miR-6862-3p	chr16	+	hsa-mir-6862-2	No	0
984	hsa-miR-4721	chr16	-	hsa-mir-4721	No	1	rs568012742	28843941	A > C	4.8e-05	8	UGAGGGCUCCAGGUGACGGUGG	UGAGGGCGCCAGGUGACGGUGG	hsa-miR-4721,UGAGGGC[U/G]CCAGGUGACGGUGG	431	224	148	47.632
985	hsa-miR-4517	chr16	+	hsa-mir-4517	No	1	rs151214931	28958592	T > C	0.001062	6	AAAUAUGAUGAAACUCACAGCUGAG	AAAUACGAUGAAACUCACAGCUGAG	hsa-miR-4517,AAAUA[U/C]GAUGAAACUCACAGCUGAG	1165	87	24	7.53856
986	hsa-miR-3680-5p	chr16	-	hsa-mir-3680-2	No	0
987	hsa-miR-3680-3p	chr16	-	hsa-mir-3680-2	No	0
988	hsa-miR-4518	chr16	+	hsa-mir-4518	No	0
989	hsa-miR-4519	chr16	-	hsa-mir-4519	No	0
990	hsa-miR-762	chr16	+	hsa-mir-762	No	1	rs750763225	30893954	G > C	1e-05	4	GGGGCUGGGGCCGGGGCCGAGC	GGGCCUGGGGCCGGGGCCGAGC	hsa-miR-762,GGG[G/C]CUGGGGCCGGGGCCGAGC	944	707	187	22.89
991	hsa-miR-6771-5p	chr16	+	hsa-mir-6771	No	3	rs370769719	50292628	G > C	9e-06	8	CUCGGGAGGGCAUGGGCCAGGC	CUCGGGACGGCAUGGGCCAGGC	hsa-miR-6771-5p,CUCGGGA[G/C]GGCAUGGGCCAGGC	41	36	5	13.0145
991	hsa-miR-6771-5p	chr16	+	hsa-mir-6771	No	3	rs750560507	50292623	C > T	2.7e-05	3	CUCGGGAGGGCAUGGGCCAGGC	CUUGGGAGGGCAUGGGCCAGGC	hsa-miR-6771-5p,CU[C/U]GGGAGGGCAUGGGCCAGGC	41	726	3	1.73885
991	hsa-miR-6771-5p	chr16	+	hsa-mir-6771	No	3	rs756387130	50292624	G > A	9e-06	4	CUCGGGAGGGCAUGGGCCAGGC	CUCAGGAGGGCAUGGGCCAGGC	hsa-miR-6771-5p,CUC[G/A]GGAGGGCAUGGGCCAGGC	41	728	5	2.89409
992	hsa-miR-6771-3p	chr16	+	hsa-mir-6771	No	0
993	hsa-miR-3181	chr16	+	hsa-mir-3181	No	0
994	hsa-miR-3935	chr16	+	hsa-mir-3935	No	0
995	hsa-miR-138-5p	chr16	+	hsa-mir-138-2	No	0
996	hsa-miR-138-2-3p	chr16	+	hsa-mir-138-2	No	0
997	hsa-miR-6863	chr16	+	hsa-mir-6863	No	2	rs12708966	56904332	G > A	0.03194	6	UAGACGUGGUGAAGGAUUGAGUG	UAGACAUGGUGAAGGAUUGAGUG	hsa-miR-6863,UAGAC[G/A]UGGUGAAGGAUUGAGUG	62	572	4	2.12406
997	hsa-miR-6863	chr16	+	hsa-mir-6863	No	2	rs751805544	56904331	C > T	8e-06	5	UAGACGUGGUGAAGGAUUGAGUG	UAGAUGUGGUGAAGGAUUGAGUG	hsa-miR-6863,UAGA[C/U]GUGGUGAAGGAUUGAGUG	62	508	4	2.25389
998	hsa-miR-6772-5p	chr16	-	hsa-mir-6772	No	0
999	hsa-miR-6772-3p	chr16	-	hsa-mir-6772	No	1	rs548914102	57772309	G > A	0.000218	4	UUGCUCCUGACUCUGUGCCCACA	UUGUUCCUGACUCUGUGCCCACA	hsa-miR-6772-3p,UUG[C/U]UCCUGACUCUGUGCCCACA	439	545	41	8.38211
1000	hsa-miR-328-3p	chr16	-	hsa-mir-328	No	1	rs773654475	67202346	C > G	8e-06	3	CUGGCCCUCUCUGCCCUUCCGU	CUCGCCCUCUCUGCCCUUCCGU	hsa-miR-328-3p,CU[G/C]GCCCUCUCUGCCCUUCCGU	337	32	0	0
1001	hsa-miR-328-5p	chr16	-	hsa-mir-328	No	2	rs755480131	67202383	C > T	8e-06	7	GGGGGGGCAGGAGGGGCUCAGGG	GGGGGGACAGGAGGGGCUCAGGG	hsa-miR-328-5p,GGGGGG[G/A]CAGGAGGGGCUCAGGG	606	615	123	20.148
1001	hsa-miR-328-5p	chr16	-	hsa-mir-328	No	2	rs765423113	67202384	C > A	1.7e-05	6	GGGGGGGCAGGAGGGGCUCAGGG	GGGGGUGCAGGAGGGGCUCAGGG	hsa-miR-328-5p,GGGGG[G/U]GCAGGAGGGGCUCAGGG	606	619	113	18.45
1002	hsa-miR-6773-5p	chr16	-	hsa-mir-6773	No	2	rs750917108	68233491	C > T	9e-06	4	UUGGGCCCAGGAGUAAACAGGAU	UUGAGCCCAGGAGUAAACAGGAU	hsa-miR-6773-5p,UUG[G/A]GCCCAGGAGUAAACAGGAU	419	390	27	6.6792
1002	hsa-miR-6773-5p	chr16	-	hsa-mir-6773	No	2	rs768081426	68233489	G > A	9e-06	6	UUGGGCCCAGGAGUAAACAGGAU	UUGGGUCCAGGAGUAAACAGGAU	hsa-miR-6773-5p,UUGGG[C/U]CCAGGAGUAAACAGGAU	419	262	23	6.94177
1003	hsa-miR-6773-3p	chr16	-	hsa-mir-6773	No	1	rs776568531	68233446	G > A	8e-06	2	ACUGUCACUUCUCUGCCCAUAG	AUUGUCACUUCUCUGCCCAUAG	hsa-miR-6773-3p,A[C/U]UGUCACUUCUCUGCCCAUAG	648	680	110	16.5711
1004	hsa-miR-1538	chr16	-	hsa-mir-1538	No	0
1005	hsa-miR-140-5p	chr16	+	hsa-mir-140	No	0
1006	hsa-miR-140-3p	chr16	+	hsa-mir-140	No	0
1007	hsa-miR-1972	chr16	+	hsa-mir-1972-2	No	0
1008	hsa-miR-4719	chr16	+	hsa-mir-4719	No	0
1009	hsa-miR-4720-5p	chr16	+	hsa-mir-4720	No	1	rs532921899	81385025	G > C	0.0002	5	CCUGGCAUAUUUGGUAUAACUU	CCUGCCAUAUUUGGUAUAACUU	hsa-miR-4720-5p,CCUG[G/C]CAUAUUUGGUAUAACUU	572	653	91	14.8897
1010	hsa-miR-4720-3p	chr16	+	hsa-mir-4720	No	0
1011	hsa-miR-7854-3p	chr16	+	hsa-mir-7854	No	0
1012	hsa-miR-6504-5p	chr16	+	hsa-mir-6504	No	0
1013	hsa-miR-6504-3p	chr16	+	hsa-mir-6504	No	0
1014	hsa-miR-8058	chr16	+	hsa-mir-8058	No	1	rs577407518	82688989	T > C	0.0002	2	CUGGACUUUGAUCUUGCCAUAA	CCGGACUUUGAUCUUGCCAUAA	hsa-miR-8058,C[U/C]GGACUUUGAUCUUGCCAUAA	372	19	1	1.18947
1015	hsa-miR-3182	chr16	+	hsa-mir-3182	No	0
1016	hsa-miR-5093	chr16	-	hsa-mir-5093	No	0
1017	hsa-miR-1910-5p	chr16	-	hsa-mir-1910	No	1	rs767396428	85741684	G > T	0.00011	6	CCAGUCCUGUGCCUGCCGCCU	CCAGUACUGUGCCUGCCGCCU	hsa-miR-1910-5p,CCAGU[C/A]CUGUGCCUGCCGCCU	446	399	24	5.68928
1018	hsa-miR-1910-3p	chr16	-	hsa-mir-1910	No	1	rs374138328	85741648	C > G	0.00011	3	GAGGCAGAAGCAGGAUGACA	GACGCAGAAGCAGGAUGACA	hsa-miR-1910-3p,GA[G/C]GCAGAAGCAGGAUGACA	1012	53	7	3.02252
1019	hsa-miR-6774-5p	chr16	+	hsa-mir-6774	No	1	rs767707170	85918353	C > T	9e-06	2	ACUUGGGCAGGAGGGACCCUGUAUG	AUUUGGGCAGGAGGGACCCUGUAUG	hsa-miR-6774-5p,A[C/U]UUGGGCAGGAGGGACCCUGUAUG	509	569	56	10.4057
1020	hsa-miR-6774-3p	chr16	+	hsa-mir-6774	No	1	rs185056029	85918398	G > A	0.000257	3	UCGUGUCCCUCUUGUCCACAG	UCAUGUCCCUCUUGUCCACAG	hsa-miR-6774-3p,UC[G/A]UGUCCCUCUUGUCCACAG	45	421	3	2.17959
1021	hsa-miR-6775-5p	chr16	-	hsa-mir-6775	No	2	rs551796757	87834654	G > A	8.2e-05	2	UCGGGGCAUGGGGGAGGGAGGCUGG	UUGGGGCAUGGGGGAGGGAGGCUGG	hsa-miR-6775-5p,U[C/U]GGGGCAUGGGGGAGGGAGGCUGG	87	545	11	5.05167
1021	hsa-miR-6775-5p	chr16	-	hsa-mir-6775	No	2	rs758317194	87834650	C > A	0.000254	6	UCGGGGCAUGGGGGAGGGAGGCUGG	UCGGGUCAUGGGGGAGGGAGGCUGG	hsa-miR-6775-5p,UCGGG[G/U]CAUGGGGGAGGGAGGCUGG	87	20	0	0
1022	hsa-miR-6775-3p	chr16	-	hsa-mir-6775	No	0
1023	hsa-miR-5189-5p	chr16	+	hsa-mir-5189	No	0
1024	hsa-miR-5189-3p	chr16	+	hsa-mir-5189	No	1	rs755177359	88468991	C > G	0.000344	8	UGCCAACCGUCAGAGCCCAGA	UGCCAACGGUCAGAGCCCAGA	hsa-miR-5189-3p,UGCCAAC[C/G]GUCAGAGCCCAGA	258	112	71	41.7676
1025	hsa-miR-4722-5p	chr16	-	hsa-mir-4722	No	1	rs774516383	88716335	G > A	8.3e-05	3	GGCAGGAGGGCUGUGCCAGGUUG	GGUAGGAGGGCUGUGCCAGGUUG	hsa-miR-4722-5p,GG[C/U]AGGAGGGCUGUGCCAGGUUG	704	256	33	7.77334
1026	hsa-miR-4722-3p	chr16	-	hsa-mir-4722	No	0
1027	hsa-miR-3183	chr17	-	hsa-mir-3183	No	0
1028	hsa-miR-22-5p	chr17	-	hsa-mir-22	No	0
1029	hsa-miR-22-3p	chr17	-	hsa-mir-22	No	0
1030	hsa-miR-132-5p	chr17	-	hsa-mir-132	Yes (2049928-2050350:2:homo:hsa-mir-132/hsa-mir-212)	0
1031	hsa-miR-132-3p	chr17	-	hsa-mir-132	Yes (2049928-2050350:2:homo:hsa-mir-132/hsa-mir-212)	0
1032	hsa-miR-212-3p	chr17	-	hsa-mir-212	Yes (2049928-2050350:2:homo:hsa-mir-132/hsa-mir-212)	0
1033	hsa-miR-212-5p	chr17	-	hsa-mir-212	Yes (2049928-2050350:2:homo:hsa-mir-132/hsa-mir-212)	2	rs775995138	2050344	C > G	2.4e-05	7	ACCUUGGCUCUAGACUGCUUACU	ACCUUGCCUCUAGACUGCUUACU	hsa-miR-212-5p,ACCUUG[G/C]CUCUAGACUGCUUACU	584	366	50	10.8149
1033	hsa-miR-212-5p	chr17	-	hsa-mir-212	Yes (2049928-2050350:2:homo:hsa-mir-132/hsa-mir-212)	2	rs547555046	2050343	G > A	0.000939	8	ACCUUGGCUCUAGACUGCUUACU	ACCUUGGUUCUAGACUGCUUACU	hsa-miR-212-5p,ACCUUGG[C/U]UCUAGACUGCUUACU	584	479	208	39.3268
1034	hsa-miR-6776-5p	chr17	-	hsa-mir-6776	No	1	rs534533016	2692911	C > G	0.0002	4	UCUGGGUGCAGUGGGGGUU	UCUCGGUGCAGUGGGGGUU	hsa-miR-6776-5p,UCU[G/C]GGUGCAGUGGGGGUU	598	40	0	0
1035	hsa-miR-6776-3p	chr17	-	hsa-mir-6776	No	0
1036	hsa-miR-1253	chr17	-	hsa-mir-1253	No	1	rs772015030	2748158	C > T	4.4e-05	2	AGAGAAGAAGAUCAGCCUGCA	AAAGAAGAAGAUCAGCCUGCA	hsa-miR-1253,A[G/A]AGAAGAAGAUCAGCCUGCA	930	1119	235	23.0362
1037	hsa-miR-6864-5p	chr17	-	hsa-mir-6864	Yes (4969701-4970145:2:hetero:hsa-mir-6864/hsa-mir-6865)	1	rs758390424	4969759	C > T	8e-06	8	UUGAAGGGACAAGUCAGAUAUGCC	UUGAAGGAACAAGUCAGAUAUGCC	hsa-miR-6864-5p,UUGAAGG[G/A]ACAAGUCAGAUAUGCC	560	736	260	40.4986
1038	hsa-miR-6864-3p	chr17	-	hsa-mir-6864	Yes (4969701-4970145:2:hetero:hsa-mir-6864/hsa-mir-6865)	0
1039	hsa-miR-6865-5p	chr17	-	hsa-mir-6865	Yes (4969701-4970145:2:hetero:hsa-mir-6864/hsa-mir-6865)	2	rs780680742	4970144	T > C	9e-06	2	UAGGUGGCAGAGGAGGGACUUCA	UGGGUGGCAGAGGAGGGACUUCA	hsa-miR-6865-5p,U[A/G]GGUGGCAGAGGAGGGACUUCA	501	741	97	15.92
1039	hsa-miR-6865-5p	chr17	-	hsa-mir-6865	Yes (4969701-4970145:2:hetero:hsa-mir-6864/hsa-mir-6865)	2	rs772430030	4970143	C > T	9e-06	3	UAGGUGGCAGAGGAGGGACUUCA	UAAGUGGCAGAGGAGGGACUUCA	hsa-miR-6865-5p,UA[G/A]GUGGCAGAGGAGGGACUUCA	501	470	59	12.1586
1040	hsa-miR-6865-3p	chr17	-	hsa-mir-6865	Yes (4969701-4970145:2:hetero:hsa-mir-6864/hsa-mir-6865)	1	rs753494379	4970108	G > A	1.7e-05	4	ACACCCUCUUUCCCUACCGCC	ACAUCCUCUUUCCCUACCGCC	hsa-miR-6865-3p,ACA[C/U]CCUCUUUCCCUACCGCC	492	565	49	9.29371
1041	hsa-miR-4520-5p	chr17	-	hsa-mir-4520-1	No	0
1042	hsa-miR-4520-3p	chr17	-	hsa-mir-4520-1	No	0
1043	hsa-miR-4520-5p	chr17	+	hsa-mir-4520-2	No	0
1044	hsa-miR-4520-2-3p	chr17	+	hsa-mir-4520-2	No	0
1045	hsa-miR-195-5p	chr17	-	hsa-mir-195	Yes (7017627-7017999:2:homo:hsa-mir-195/hsa-mir-497)	0
1046	hsa-miR-195-3p	chr17	-	hsa-mir-195	Yes (7017627-7017999:2:homo:hsa-mir-195/hsa-mir-497)	2	rs769526119	7017646	T > C	1.4e-05	4	CCAAUAUUGGCUGUGCUGCUCC	CCAGUAUUGGCUGUGCUGCUCC	hsa-miR-195-3p,CCA[A/G]UAUUGGCUGUGCUGCUCC	1279	915	263	24.3114
1046	hsa-miR-195-3p	chr17	-	hsa-mir-195	Yes (7017627-7017999:2:homo:hsa-mir-195/hsa-mir-497)	2	rs748112857	7017643	A > G	1.3e-05	7	CCAAUAUUGGCUGUGCUGCUCC	CCAAUACUGGCUGUGCUGCUCC	hsa-miR-195-3p,CCAAUA[U/C]UGGCUGUGCUGCUCC	1279	618	195	21.9334
1047	hsa-miR-497-5p	chr17	-	hsa-mir-497	Yes (7017627-7017999:2:homo:hsa-mir-195/hsa-mir-497)	0
1048	hsa-miR-497-3p	chr17	-	hsa-mir-497	Yes (7017627-7017999:2:homo:hsa-mir-195/hsa-mir-497)	0
1049	hsa-miR-324-5p	chr17	-	hsa-mir-324	No	1	rs771412719	7223363	C > T	3.4e-05	2	CGCAUCCCCUAGGGCAUUGGUGU	CACAUCCCCUAGGGCAUUGGUGU	hsa-miR-324-5p,C[G/A]CAUCCCCUAGGGCAUUGGUGU	309	367	23	6.82992
1050	hsa-miR-324-3p	chr17	-	hsa-mir-324	No	2	rs769542848	7223323	G > A	0.000108	5	ACUGCCCCAGGUGCUGCUGG	ACUGUCCCAGGUGCUGCUGG	hsa-miR-324-3p,ACUG[C/U]CCCAGGUGCUGCUGG	866	660	112	14.8145
1050	hsa-miR-324-3p	chr17	-	hsa-mir-324	No	2	rs377743856	7223321	G > A	9.7e-05	7	ACUGCCCCAGGUGCUGCUGG	ACUGCCUCAGGUGCUGCUGG	hsa-miR-324-3p,ACUGCC[C/U]CAGGUGCUGCUGG	866	1008	191	20.443
1051	hsa-miR-4314	chr17	+	hsa-mir-4314	No	0
1052	hsa-miR-6883-5p	chr17	-	hsa-mir-6883	No	4	rs775493098	8145063	C > T	1e-05	4	AGGGAGGGUGUGGUAUGGAUGU	AGGAAGGGUGUGGUAUGGAUGU	hsa-miR-6883-5p,AGG[G/A]AGGGUGUGGUAUGGAUGU	1486	1034	336	27.1063
1052	hsa-miR-6883-5p	chr17	-	hsa-mir-6883	No	4	rs767634216	8145062	T > G	1e-05	5	AGGGAGGGUGUGGUAUGGAUGU	AGGGCGGGUGUGGUAUGGAUGU	hsa-miR-6883-5p,AGGG[A/C]GGGUGUGGUAUGGAUGU	1486	177	71	13.844
1052	hsa-miR-6883-5p	chr17	-	hsa-mir-6883	No	4	rs191969970	8145059	C > A	0.002051	8	AGGGAGGGUGUGGUAUGGAUGU	AGGGAGGUUGUGGUAUGGAUGU	hsa-miR-6883-5p,AGGGAGG[G/U]UGUGGUAUGGAUGU	1486	1118	789	61.2134
1052	hsa-miR-6883-5p	chr17	-	hsa-mir-6883	No	4	rs759845479	8145060	C > T	1e-05	7	AGGGAGGGUGUGGUAUGGAUGU	AGGGAGAGUGUGGUAUGGAUGU	hsa-miR-6883-5p,AGGGAG[G/A]GUGUGGUAUGGAUGU	1486	948	325	27.3823
1053	hsa-miR-6883-3p	chr17	-	hsa-mir-6883	No	1	rs745542336	8145013	G > A	1.9e-05	3	UUCCCUAUCUCACUCUCCUCAG	UUUCCUAUCUCACUCUCCUCAG	hsa-miR-6883-3p,UU[C/U]CCUAUCUCACUCUCCUCAG	388	972	87	14.1668
1054	hsa-miR-4521	chr17	+	hsa-mir-4521	No	0
1055	hsa-miR-744-5p	chr17	+	hsa-mir-744	No	1	rs748252260	12081912	G > A	1e-05	4	UGCGGGGCUAGGGCUAACAGCA	UGCAGGGCUAGGGCUAACAGCA	hsa-miR-744-5p,UGC[G/A]GGGCUAGGGCUAACAGCA	151	939	45	11.9506
1056	hsa-miR-744-3p	chr17	+	hsa-mir-744	No	1	rs370545796	12081970	T > G	1e-05	5	CUGUUGCCACUAACCUCAACCU	CUGUGGCCACUAACCUCAACCU	hsa-miR-744-3p,CUGU[U/G]GCCACUAACCUCAACCU	405	422	29	7.01478
1057	hsa-miR-1269b	chr17	-	hsa-mir-1269b	No	1	rs7210937	12917329	G > C	0.352073	6	CUGGACUGAGCCAUGCUACUGG	CUGGAGUGAGCCAUGCUACUGG	hsa-miR-1269b,CUGGA[C/G]UGAGCCAUGCUACUGG	315	404	34	9.53088
1058	hsa-miR-548h-5p	chr17	-	hsa-mir-548h-3	No	0
1059	hsa-miR-4731-5p	chr17	-	hsa-mir-4731	No	0
1060	hsa-miR-4731-3p	chr17	-	hsa-mir-4731	No	1	rs66507245	15251649	T > A	0.43131	7	CACACAAGUGGCCCCCAACACU	CACACAUGUGGCCCCCAACACU	hsa-miR-4731-3p,CACACA[A/U]GUGGCCCCCAACACU	1178	1201	325	27.3237
1061	hsa-miR-1288-3p	chr17	+	hsa-mir-1288	No	0
1062	hsa-miR-1288-5p	chr17	+	hsa-mir-1288	No	3	rs775987417	16282033	T > C	1.6e-05	6	GCAGAUCAGGACUGUAACUCACC	GCAGACCAGGACUGUAACUCACC	hsa-miR-1288-5p,GCAGA[U/C]CAGGACUGUAACUCACC	426	390	20	4.90674
1062	hsa-miR-1288-5p	chr17	+	hsa-mir-1288	No	3	rs761135812	16282034	C > T	1.6e-05	7	GCAGAUCAGGACUGUAACUCACC	GCAGAUUAGGACUGUAACUCACC	hsa-miR-1288-5p,GCAGAU[C/U]AGGACUGUAACUCACC	426	737	60	10.7081
1062	hsa-miR-1288-5p	chr17	+	hsa-mir-1288	No	3	rs770474728	16282031	G > C	1.6e-05	4	GCAGAUCAGGACUGUAACUCACC	GCACAUCAGGACUGUAACUCACC	hsa-miR-1288-5p,GCA[G/C]AUCAGGACUGUAACUCACC	426	695	49	9.00531
1063	hsa-miR-6777-5p	chr17	-	hsa-mir-6777	Yes (17813479-17813916:2:hetero:hsa-mir-6777/hsa-mir-33b)	4	rs760352664	17813538	C > T	4.4e-05	3	ACGGGGAGUCAGGCAGUGGUGGA	ACAGGGAGUCAGGCAGUGGUGGA	hsa-miR-6777-5p,AC[G/A]GGGAGUCAGGCAGUGGUGGA	117	828	23	7.38958
1063	hsa-miR-6777-5p	chr17	-	hsa-mir-6777	Yes (17813479-17813916:2:hetero:hsa-mir-6777/hsa-mir-33b)	4	rs775467840	17813537	C > G	2.2e-05	4	ACGGGGAGUCAGGCAGUGGUGGA	ACGCGGAGUCAGGCAGUGGUGGA	hsa-miR-6777-5p,ACG[G/C]GGAGUCAGGCAGUGGUGGA	117	8	0	0
1063	hsa-miR-6777-5p	chr17	-	hsa-mir-6777	Yes (17813479-17813916:2:hetero:hsa-mir-6777/hsa-mir-33b)	4	rs56155608	17813539	G > A	0.00979	2	ACGGGGAGUCAGGCAGUGGUGGA	AUGGGGAGUCAGGCAGUGGUGGA	hsa-miR-6777-5p,A[C/U]GGGGAGUCAGGCAGUGGUGGA	117	849	21	6.66304
1063	hsa-miR-6777-5p	chr17	-	hsa-mir-6777	Yes (17813479-17813916:2:hetero:hsa-mir-6777/hsa-mir-33b)	4	rs767433200	17813535	C > G	2.2e-05	6	ACGGGGAGUCAGGCAGUGGUGGA	ACGGGCAGUCAGGCAGUGGUGGA	hsa-miR-6777-5p,ACGGG[G/C]AGUCAGGCAGUGGUGGA	117	53	2	2.5398
1064	hsa-miR-6777-3p	chr17	-	hsa-mir-6777	Yes (17813479-17813916:2:hetero:hsa-mir-6777/hsa-mir-33b)	1	rs191900683	17813493	G > A	0.0002	7	UCCACUCUCCUGGCCCCCAG	UCCACUUUCCUGGCCCCCAG	hsa-miR-6777-3p,UCCACU[C/U]UCCUGGCCCCCAG	410	739	56	10.1736
1065	hsa-miR-33b-5p	chr17	-	hsa-mir-33b	Yes (17813479-17813916:2:hetero:hsa-mir-6777/hsa-mir-33b)	0
1066	hsa-miR-33b-3p	chr17	-	hsa-mir-33b	Yes (17813479-17813916:2:hetero:hsa-mir-6777/hsa-mir-33b)	0
1067	hsa-miR-6778-5p	chr17	-	hsa-mir-6778	No	0
1068	hsa-miR-6778-3p	chr17	-	hsa-mir-6778	No	1	rs764805351	18340831	G > C	8.4e-05	4	UGCCUCCCUGACAUUCCACAG	UGCGUCCCUGACAUUCCACAG	hsa-miR-6778-3p,UGC[C/G]UCCCUGACAUUCCACAG	816	38	3	1.70367
1069	hsa-miR-1180-3p	chr17	-	hsa-mir-1180	No	0
1070	hsa-miR-1180-5p	chr17	-	hsa-mir-1180	No	0
1071	hsa-miR-4522	chr17	-	hsa-mir-4522	No	0
1072	hsa-miR-4723-5p	chr17	+	hsa-mir-4723	No	2	rs782263442	28360661	G > C	8e-06	2	UGGGGGAGCCAUGAGAUAAGAGCA	UCGGGGAGCCAUGAGAUAAGAGCA	hsa-miR-4723-5p,U[G/C]GGGGAGCCAUGAGAUAAGAGCA	808	117	20	6.50476
1072	hsa-miR-4723-5p	chr17	+	hsa-mir-4723	No	2	rs782346574	28360665	G > A	1.7e-05	6	UGGGGGAGCCAUGAGAUAAGAGCA	UGGGGAAGCCAUGAGAUAAGAGCA	hsa-miR-4723-5p,UGGGG[G/A]AGCCAUGAGAUAAGAGCA	808	981	200	22.4641
1073	hsa-miR-4723-3p	chr17	+	hsa-mir-4723	No	0
1074	hsa-miR-451a	chr17	-	hsa-mir-451a	Yes (28861376-28861722:3:hetero:hsa-mir-451a/hsa-mir-144/hsa-mir-4732)	1	rs747864207	28861417	A > C	5.9e-05	8	AAACCGUUACCAUUACUGAGUU	AAACCGUGACCAUUACUGAGUU	hsa-miR-451a,AAACCGU[U/G]ACCAUUACUGAGUU	60	46	3	5.7104
1075	hsa-miR-451b	chr17	+	hsa-mir-451b	Yes (28861376-28861722:3:hetero:hsa-mir-451a/hsa-mir-144/hsa-mir-4732)	0
1076	hsa-miR-144-5p	chr17	-	hsa-mir-144	Yes (28861376-28861722:3:hetero:hsa-mir-451a/hsa-mir-144/hsa-mir-4732)	2	rs758282333	28861599	A > G	9e-06	6	GGAUAUCAUCAUAUACUGUAAG	GGAUACCAUCAUAUACUGUAAG	hsa-miR-144-5p,GGAUA[U/C]CAUCAUAUACUGUAAG	311	270	16	5.52151
1076	hsa-miR-144-5p	chr17	-	hsa-mir-144	Yes (28861376-28861722:3:hetero:hsa-mir-451a/hsa-mir-144/hsa-mir-4732)	2	rs777558980	28861600	T > C	2.8e-05	5	GGAUAUCAUCAUAUACUGUAAG	GGAUGUCAUCAUAUACUGUAAG	hsa-miR-144-5p,GGAU[A/G]UCAUCAUAUACUGUAAG	311	400	24	6.80458
1077	hsa-miR-144-3p	chr17	-	hsa-mir-144	Yes (28861376-28861722:3:hetero:hsa-mir-451a/hsa-mir-144/hsa-mir-4732)	0
1078	hsa-miR-4732-5p	chr17	-	hsa-mir-4732	Yes (28861376-28861722:3:hetero:hsa-mir-451a/hsa-mir-144/hsa-mir-4732)	1	rs758352089	28861718	C > T	0.000199	5	UGUAGAGCAGGGAGCAGGAAGCU	UGUAAAGCAGGGAGCAGGAAGCU	hsa-miR-4732-5p,UGUA[G/A]AGCAGGGAGCAGGAAGCU	210	575	19	5.46777
1079	hsa-miR-4732-3p	chr17	-	hsa-mir-4732	Yes (28861376-28861722:3:hetero:hsa-mir-451a/hsa-mir-144/hsa-mir-4732)	2	rs764671964	28861687	G > A	3.4e-05	2	GCCCUGACCUGUCCUGUUCUG	GUCCUGACCUGUCCUGUUCUG	hsa-miR-4732-3p,G[C/U]CCUGACCUGUCCUGUUCUG	471	645	64	11.6115
1079	hsa-miR-4732-3p	chr17	-	hsa-mir-4732	Yes (28861376-28861722:3:hetero:hsa-mir-451a/hsa-mir-144/hsa-mir-4732)	2	rs759206735	28861686	G > A	3.3e-05	3	GCCCUGACCUGUCCUGUUCUG	GCUCUGACCUGUCCUGUUCUG	hsa-miR-4732-3p,GC[C/U]CUGACCUGUCCUGUUCUG	471	614	54	10.0415
1080	hsa-miR-4523	chr17	+	hsa-mir-4523	No	0
1081	hsa-miR-423-5p	chr17	+	hsa-mir-423	No	1	rs766187585	30117100	G > A	3.1e-05	6	UGAGGGGCAGAGAGCGAGACUUU	UGAGGAGCAGAGAGCGAGACUUU	hsa-miR-423-5p,UGAGG[G/A]GCAGAGAGCGAGACUUU	871	726	155	19.4919
1082	hsa-miR-423-3p	chr17	+	hsa-mir-423	No	0
1083	hsa-miR-3184-5p	chr17	-	hsa-mir-3184	No	2	rs758570527	30117146	C > T	3.7e-05	6	UGAGGGGCCUCAGACCGAGCUUUU	UGAGGAGCCUCAGACCGAGCUUUU	hsa-miR-3184-5p,UGAGG[G/A]GCCUCAGACCGAGCUUUU	871	726	155	19.4919
1083	hsa-miR-3184-5p	chr17	-	hsa-mir-3184	No	2	rs764015534	30117148	C > A	3.7e-05	4	UGAGGGGCCUCAGACCGAGCUUUU	UGAUGGGCCUCAGACCGAGCUUUU	hsa-miR-3184-5p,UGA[G/U]GGGCCUCAGACCGAGCUUUU	871	358	66	11.8193
1084	hsa-miR-3184-3p	chr17	-	hsa-mir-3184	No	0
1085	hsa-miR-4733-5p	chr17	-	hsa-mir-4733	No	1	rs529859631	31094415	T > C	0.0002	2	AAUCCCAAUGCUAGACCCGGUG	AGUCCCAAUGCUAGACCCGGUG	hsa-miR-4733-5p,A[A/G]UCCCAAUGCUAGACCCGGUG	573	396	43	9.027
1086	hsa-miR-4733-3p	chr17	-	hsa-mir-4733	No	0
1087	hsa-miR-4724-5p	chr17	+	hsa-mir-4724	No	0
1088	hsa-miR-4724-3p	chr17	+	hsa-mir-4724	No	0
1089	hsa-miR-193a-5p	chr17	+	hsa-mir-193a	No	4	rs749647122	31560017	G > C	1.2e-05	2	UGGGUCUUUGCGGGCGAGAUGA	UCGGUCUUUGCGGGCGAGAUGA	hsa-miR-193a-5p,U[G/C]GGUCUUUGCGGGCGAGAUGA	310	38	0	0
1089	hsa-miR-193a-5p	chr17	+	hsa-mir-193a	No	4	rs774856420	31560019	G > A	1.2e-05	4	UGGGUCUUUGCGGGCGAGAUGA	UGGAUCUUUGCGGGCGAGAUGA	hsa-miR-193a-5p,UGG[G/A]UCUUUGCGGGCGAGAUGA	310	303	17	5.54685
1089	hsa-miR-193a-5p	chr17	+	hsa-mir-193a	No	4	rs769175200	31560018	G > C	1.2e-05	3	UGGGUCUUUGCGGGCGAGAUGA	UGCGUCUUUGCGGGCGAGAUGA	hsa-miR-193a-5p,UG[G/C]GUCUUUGCGGGCGAGAUGA	310	33	0	0
1089	hsa-miR-193a-5p	chr17	+	hsa-mir-193a	No	4	rs748616583	31560021	C > T	1.2e-05	6	UGGGUCUUUGCGGGCGAGAUGA	UGGGUUUUUGCGGGCGAGAUGA	hsa-miR-193a-5p,UGGGU[C/U]UUUGCGGGCGAGAUGA	310	765	42	8.62458
1090	hsa-miR-193a-3p	chr17	+	hsa-mir-193a	No	0
1091	hsa-miR-4725-5p	chr17	+	hsa-mir-4725	Yes (31575280-31575499:2:hetero:hsa-mir-4725/hsa-mir-365b)	2	rs768818964	31575284	C > T	9e-06	4	AGACCCUGCAGCCUUCCCACC	AGAUCCUGCAGCCUUCCCACC	hsa-miR-4725-5p,AGA[C/U]CCUGCAGCCUUCCCACC	294	254	15	5.48909
1091	hsa-miR-4725-5p	chr17	+	hsa-mir-4725	Yes (31575280-31575499:2:hetero:hsa-mir-4725/hsa-mir-365b)	2	rs773138185	31575285	C > T	9e-06	5	AGACCCUGCAGCCUUCCCACC	AGACUCUGCAGCCUUCCCACC	hsa-miR-4725-5p,AGAC[C/U]CUGCAGCCUUCCCACC	294	327	13	4.19272
1092	hsa-miR-4725-3p	chr17	+	hsa-mir-4725	Yes (31575280-31575499:2:hetero:hsa-mir-4725/hsa-mir-365b)	0
1093	hsa-miR-365b-5p	chr17	+	hsa-mir-365b	Yes (31575280-31575499:2:hetero:hsa-mir-4725/hsa-mir-365b)	0
1094	hsa-miR-365b-3p	chr17	+	hsa-mir-365b	Yes (31575280-31575499:2:hetero:hsa-mir-4725/hsa-mir-365b)	1	rs781117282	31575484	C > T	8e-06	7	UAAUGCCCCUAAAAAUCCUUAU	UAAUGCUCCUAAAAAUCCUUAU	hsa-miR-365b-3p,UAAUGC[C/U]CCUAAAAAUCCUUAU	409	702	67	12.5039
1095	hsa-miR-632	chr17	+	hsa-mir-632	No	4	rs748314663	32350175	G > A	9e-06	7	GUGUCUGCUUCCUGUGGGA	GUGUCUACUUCCUGUGGGA	hsa-miR-632,GUGUCU[G/A]CUUCCUGUGGGA	542	444	47	9.58091
1095	hsa-miR-632	chr17	+	hsa-mir-632	No	4	rs768608675	32350173	C > T	9e-06	5	GUGUCUGCUUCCUGUGGGA	GUGUUUGCUUCCUGUGGGA	hsa-miR-632,GUGU[C/U]UGCUUCCUGUGGGA	542	898	101	14.4772
1095	hsa-miR-632	chr17	+	hsa-mir-632	No	4	rs772438699	32350176	C > T	9e-06	8	GUGUCUGCUUCCUGUGGGA	GUGUCUGUUUCCUGUGGGA	hsa-miR-632,GUGUCUG[C/U]UUCCUGUGGGA	542	601	229	40.1235
1095	hsa-miR-632	chr17	+	hsa-mir-632	No	4	rs774557910	32350174	T > C	9e-06	6	GUGUCUGCUUCCUGUGGGA	GUGUCCGCUUCCUGUGGGA	hsa-miR-632,GUGUC[U/C]GCUUCCUGUGGGA	542	22	3	2.74733
1096	hsa-miR-2909	chr17	+	hsa-mir-2909	No	1	rs187707102	37033754	G > A	0.0002	7	GUUAGGGCCAACAUCUCUUGG	GUUAGGACCAACAUCUCUUGG	hsa-miR-2909,GUUAGG[G/A]CCAACAUCUCUUGG	308	489	41	10.5646
1097	hsa-miR-378j	chr17	-	hsa-mir-378j	No	0
1098	hsa-miR-4734	chr17	-	hsa-mir-4734	No	0
1099	hsa-miR-4726-5p	chr17	+	hsa-mir-4726	No	0
1100	hsa-miR-4726-3p	chr17	+	hsa-mir-4726	No	1	rs781466704	38719733	G > A	4.8e-05	7	ACCCAGGUUCCCUCUGGCCGCA	ACCCAGAUUCCCUCUGGCCGCA	hsa-miR-4726-3p,ACCCAG[G/A]UUCCCUCUGGCCGCA	1158	668	158	17.9645
1101	hsa-miR-4727-5p	chr17	+	hsa-mir-4727	No	0
1102	hsa-miR-4727-3p	chr17	+	hsa-mir-4727	No	0
1103	hsa-miR-6779-5p	chr17	+	hsa-mir-6779	No	1	rs764535924	38914985	T > A	9e-06	2	CUGGGAGGGGCUGGGUUUGGC	CAGGGAGGGGCUGGGUUUGGC	hsa-miR-6779-5p,C[U/A]GGGAGGGGCUGGGUUUGGC	996	849	186	20.2269
1104	hsa-miR-6779-3p	chr17	+	hsa-mir-6779	No	0
1105	hsa-miR-4728-5p	chr17	+	hsa-mir-4728	No	2	rs748675090	39726501	G > C	8e-06	6	UGGGAGGGGAGAGGCAGCAAGCA	UGGGACGGGAGAGGCAGCAAGCA	hsa-miR-4728-5p,UGGGA[G/C]GGGAGAGGCAGCAAGCA	1486	63	25	8.17072
1105	hsa-miR-4728-5p	chr17	+	hsa-mir-4728	No	2	rs778443386	39726497	G > C	1.9e-05	2	UGGGAGGGGAGAGGCAGCAAGCA	UCGGAGGGGAGAGGCAGCAAGCA	hsa-miR-4728-5p,U[G/C]GGAGGGGAGAGGCAGCAAGCA	1486	57	22	7.5592
1106	hsa-miR-4728-3p	chr17	+	hsa-mir-4728	No	0
1107	hsa-miR-6884-5p	chr17	-	hsa-mir-6884	No	0
1108	hsa-miR-6884-3p	chr17	-	hsa-mir-6884	No	0
1109	hsa-miR-6866-5p	chr17	+	hsa-mir-6866	No	1	rs749791660	40161945	C > G	8e-06	8	UUAGAGGCUGGAAUAGAGAUUCU	UUAGAGGGUGGAAUAGAGAUUCU	hsa-miR-6866-5p,UUAGAGG[C/G]UGGAAUAGAGAUUCU	339	265	100	33.3639
1110	hsa-miR-6866-3p	chr17	+	hsa-mir-6866	No	1	rs760418928	40161984	C > T	2.5e-05	5	GAUCCCUUUAUCUGUCCUCUAG	GAUCUCUUUAUCUGUCCUCUAG	hsa-miR-6866-3p,GAUC[C/U]CUUUAUCUGUCCUCUAG	392	756	74	13.5934
1111	hsa-miR-6867-5p	chr17	+	hsa-mir-6867	No	1	rs761981564	40193606	T > A	8e-06	5	UGUGUGUGUAGAGGAAGAAGGGA	UGUGAGUGUAGAGGAAGAAGGGA	hsa-miR-6867-5p,UGUG[U/A]GUGUAGAGGAAGAAGGGA	1187	378	107	15.974
1112	hsa-miR-6867-3p	chr17	+	hsa-mir-6867	No	2	rs202050374	40193646	T > C	0.000744	4	CUCUCCCUCUUUACCCACUAG	CUCCCCCUCUUUACCCACUAG	hsa-miR-6867-3p,CUC[U/C]CCCUCUUUACCCACUAG	831	572	108	15.6648
1112	hsa-miR-6867-3p	chr17	+	hsa-mir-6867	No	2	rs367842831	40193647	C > G	2.5e-05	5	CUCUCCCUCUUUACCCACUAG	CUCUGCCUCUUUACCCACUAG	hsa-miR-6867-3p,CUCU[C/G]CCUCUUUACCCACUAG	831	670	115	15.412
1113	hsa-miR-6510-5p	chr17	-	hsa-mir-6510	No	0
1114	hsa-miR-6510-3p	chr17	-	hsa-mir-6510	No	3	rs755047239	41517180	G > A	3.3e-05	7	CACCGACUCUGUCUCCUGCAG	CACCGAUUCUGUCUCCUGCAG	hsa-miR-6510-3p,CACCGA[C/U]UCUGUCUCCUGCAG	23	36	0	0
1114	hsa-miR-6510-3p	chr17	-	hsa-mir-6510	No	3	rs752820664	41517183	G > A	1.7e-05	4	CACCGACUCUGUCUCCUGCAG	CACUGACUCUGUCUCCUGCAG	hsa-miR-6510-3p,CAC[C/U]GACUCUGUCUCCUGCAG	23	439	1	0.995185
1114	hsa-miR-6510-3p	chr17	-	hsa-mir-6510	No	3	rs779216899	41517182	C > T	5.9e-05	5	CACCGACUCUGUCUCCUGCAG	CACCAACUCUGUCUCCUGCAG	hsa-miR-6510-3p,CACC[G/A]ACUCUGUCUCCUGCAG	23	378	1	1.07248
1115	hsa-miR-548at-5p	chr17	+	hsa-mir-548at	No	2	rs541543333	42494777	G > A	0.0002	5	AAAAGUUAUUGCGGUUUUGGCU	AAAAAUUAUUGCGGUUUUGGCU	hsa-miR-548at-5p,AAAA[G/A]UUAUUGCGGUUUUGGCU	1608	3630	1065	44.0812
1115	hsa-miR-548at-5p	chr17	+	hsa-mir-548at	No	2	rs758271704	42494780	A > G	1.3e-05	8	AAAAGUUAUUGCGGUUUUGGCU	AAAAGUUGUUGCGGUUUUGGCU	hsa-miR-548at-5p,AAAAGUU[A/G]UUGCGGUUUUGGCU	1608	1313	909	62.5588
1116	hsa-miR-548at-3p	chr17	+	hsa-mir-548at	No	2	rs547833442	42494817	G > A	0.000182	8	CAAAACCGCAGUAACUUUUGU	CAAAACCACAGUAACUUUUGU	hsa-miR-548at-3p,CAAAACC[G/A]CAGUAACUUUUGU	791	1885	704	57.6539
1116	hsa-miR-548at-3p	chr17	+	hsa-mir-548at	No	2	rs548508717	42494816	C > T	0.0002	7	CAAAACCGCAGUAACUUUUGU	CAAAACUGCAGUAACUUUUGU	hsa-miR-548at-3p,CAAAAC[C/U]GCAGUAACUUUUGU	791	2137	381	29.3045
1117	hsa-miR-5010-5p	chr17	+	hsa-mir-5010	No	2	rs780975569	42514211	G > A	0.000127	4	AGGGGGAUGGCAGAGCAAAAUU	AGGAGGAUGGCAGAGCAAAAUU	hsa-miR-5010-5p,AGG[G/A]GGAUGGCAGAGCAAAAUU	475	566	79	15.236
1117	hsa-miR-5010-5p	chr17	+	hsa-mir-5010	No	2	rs757149539	42514210	G > A	9e-06	3	AGGGGGAUGGCAGAGCAAAAUU	AGAGGGAUGGCAGAGCAAAAUU	hsa-miR-5010-5p,AG[G/A]GGGAUGGCAGAGCAAAAUU	475	521	65	13.0662
1118	hsa-miR-5010-3p	chr17	+	hsa-mir-5010	No	2	rs767051541	42514270	T > G	3.6e-05	4	UUUUGUGUCUCCCAUUCCCCAG	UUUGGUGUCUCCCAUUCCCCAG	hsa-miR-5010-3p,UUU[U/G]GUGUCUCCCAUUCCCCAG	1145	540	135	17.1686
1118	hsa-miR-5010-3p	chr17	+	hsa-mir-5010	No	2	rs777273555	42514273	G > A	9e-06	7	UUUUGUGUCUCCCAUUCCCCAG	UUUUGUAUCUCCCAUUCCCCAG	hsa-miR-5010-3p,UUUUGU[G/A]UCUCCCAUUCCCCAG	1145	1630	353	25.8391
1119	hsa-miR-6780a-5p	chr17	-	hsa-mir-6780a	No	0
1120	hsa-miR-6780a-3p	chr17	-	hsa-mir-6780a	No	2	rs200279579	42708103	A > G	0.000114	2	CUCCUCUGUUUUCUUUCCUAG	CCCCUCUGUUUUCUUUCCUAG	hsa-miR-6780a-3p,C[U/C]CCUCUGUUUUCUUUCCUAG	940	660	122	15.489
1120	hsa-miR-6780a-3p	chr17	-	hsa-mir-6780a	No	2	rs555460978	42708097	C > G	0.0002	8	CUCCUCUGUUUUCUUUCCUAG	CUCCUCUCUUUUCUUUCCUAG	hsa-miR-6780a-3p,CUCCUCU[G/C]UUUUCUUUCCUAG	940	951	505	53.4118
1121	hsa-miR-6781-5p	chr17	-	hsa-mir-6781	No	4	rs780973261	42823936	C > T	1.4e-05	3	CGGGCCGGAGGUCAAGGGCGU	CGAGCCGGAGGUCAAGGGCGU	hsa-miR-6781-5p,CG[G/A]GCCGGAGGUCAAGGGCGU	87	32	1	1.89525
1121	hsa-miR-6781-5p	chr17	-	hsa-mir-6781	No	4	rs746862490	42823933	G > A	1.3e-05	6	CGGGCCGGAGGUCAAGGGCGU	CGGGCUGGAGGUCAAGGGCGU	hsa-miR-6781-5p,CGGGC[C/U]GGAGGUCAAGGGCGU	87	944	25	8.72357
1121	hsa-miR-6781-5p	chr17	-	hsa-mir-6781	No	4	rs757056784	42823934	G > A	1.3e-05	5	CGGGCCGGAGGUCAAGGGCGU	CGGGUCGGAGGUCAAGGGCGU	hsa-miR-6781-5p,CGGG[C/U]CGGAGGUCAAGGGCGU	87	22	1	2.28575
1121	hsa-miR-6781-5p	chr17	-	hsa-mir-6781	No	4	rs113788577	42823937	C > T	0.5	2	CGGGCCGGAGGUCAAGGGCGU	CAGGCCGGAGGUCAAGGGCGU	hsa-miR-6781-5p,C[G/A]GGCCGGAGGUCAAGGGCGU	87	34	1	1.83866
1122	hsa-miR-6781-3p	chr17	-	hsa-mir-6781	No	1	rs761119224	42823894	A > C	9e-06	8	UGCCUCUUUUCCACGGCCUCAG	UGCCUCUGUUCCACGGCCUCAG	hsa-miR-6781-3p,UGCCUCU[U/G]UUCCACGGCCUCAG	517	594	213	38.4363
1123	hsa-miR-2117	chr17	+	hsa-mir-2117	No	0
1124	hsa-miR-6782-5p	chr17	-	hsa-mir-6782	No	1	rs750793680	44207829	C > A	1.7e-05	6	UAGGGGUGGGGGAAUUCAGGGGUGU	UAGGGUUGGGGGAAUUCAGGGGUGU	hsa-miR-6782-5p,UAGGG[G/U]UGGGGGAAUUCAGGGGUGU	317	260	16	5.57319
1125	hsa-miR-6782-3p	chr17	-	hsa-mir-6782	No	2	rs534624276	44207787	C > T	0.000403	8	CACCUUUGUGUCCCCAUCCUGCA	CACCUUUAUGUCCCCAUCCUGCA	hsa-miR-6782-3p,CACCUUU[G/A]UGUCCCCAUCCUGCA	612	774	337	48.9648
1125	hsa-miR-6782-3p	chr17	-	hsa-mir-6782	No	2	rs760484477	44207791	G > A	1.6e-05	4	CACCUUUGUGUCCCCAUCCUGCA	CACUUUUGUGUCCCCAUCCUGCA	hsa-miR-6782-3p,CAC[C/U]UUUGUGUCCCCAUCCUGCA	612	1494	227	23.7397
1126	hsa-miR-6783-5p	chr17	-	hsa-mir-6783	No	0
1127	hsa-miR-6783-3p	chr17	-	hsa-mir-6783	No	0
1128	hsa-miR-6784-5p	chr17	-	hsa-mir-6784	No	1	rs745767250	45114425	C > T	0.000193	4	GCCGGGGCUUUGGGUGAGGG	GCCAGGGCUUUGGGUGAGGG	hsa-miR-6784-5p,GCC[G/A]GGGCUUUGGGUGAGGG	123	1022	34	9.58961
1129	hsa-miR-6784-3p	chr17	-	hsa-mir-6784	No	2	rs779377583	45114384	T > A	5.1e-05	5	UCUCACCCCAACUCUGCCCCAG	UCUCUCCCCAACUCUGCCCCAG	hsa-miR-6784-3p,UCUC[A/U]CCCCAACUCUGCCCCAG	431	1012	92	13.9303
1129	hsa-miR-6784-3p	chr17	-	hsa-mir-6784	No	2	rs748541214	45114385	G > C	5.1e-05	4	UCUCACCCCAACUCUGCCCCAG	UCUGACCCCAACUCUGCCCCAG	hsa-miR-6784-3p,UCU[C/G]ACCCCAACUCUGCCCCAG	431	387	34	8.32501
1130	hsa-miR-4315	chr17	-	hsa-mir-4315-1	No	3	rs375872306	45475422	G > A	1.7e-05	4	CCGCUUUCUGAGCUGGAC	CCGUUUUCUGAGCUGGAC	hsa-miR-4315,CCG[C/U]UUUCUGAGCUGGAC	64	130	0	0
1130	hsa-miR-4315	chr17	-	hsa-mir-4315-1	No	3	rs147167801	45475424	G > A	2.5e-05	2	CCGCUUUCUGAGCUGGAC	CUGCUUUCUGAGCUGGAC	hsa-miR-4315,C[C/U]GCUUUCUGAGCUGGAC	64	1504	14	4.51247
1130	hsa-miR-4315	chr17	-	hsa-mir-4315-1	No	3	rs143523766	45475423	C > T	0.0005	3	CCGCUUUCUGAGCUGGAC	CCACUUUCUGAGCUGGAC	hsa-miR-4315,CC[G/A]CUUUCUGAGCUGGAC	64	1136	16	5.93391
1131	hsa-miR-5089-5p	chr17	+	hsa-mir-5089	No	0
1132	hsa-miR-5089-3p	chr17	+	hsa-mir-5089	No	0
1133	hsa-miR-152-3p	chr17	-	hsa-mir-152	No	0
1134	hsa-miR-152-5p	chr17	-	hsa-mir-152	No	0
1135	hsa-miR-1203	chr17	-	hsa-mir-1203	No	2	rs764824939	48156503	C > T	1.7e-05	4	CCCGGAGCCAGGAUGCAGCUC	CCCAGAGCCAGGAUGCAGCUC	hsa-miR-1203,CCC[G/A]GAGCCAGGAUGCAGCUC	48	757	4	2.09842
1135	hsa-miR-1203	chr17	-	hsa-mir-1203	No	2	rs547972348	48156504	G > A	0.000355	3	CCCGGAGCCAGGAUGCAGCUC	CCUGGAGCCAGGAUGCAGCUC	hsa-miR-1203,CC[C/U]GGAGCCAGGAUGCAGCUC	48	733	6	3.19874
1136	hsa-miR-10a-5p	chr17	-	hsa-mir-10a	No	1	rs770328167	48579924	G > A	9e-06	3	UACCCUGUAGAUCCGAAUUUGUG	UAUCCUGUAGAUCCGAAUUUGUG	hsa-miR-10a-5p,UA[C/U]CCUGUAGAUCCGAAUUUGUG	334	449	35	9.03799
1137	hsa-miR-10a-3p	chr17	-	hsa-mir-10a	No	1	rs768238280	48579878	C > T	9e-06	8	CAAAUUCGUAUCUAGGGGAAUA	CAAAUUCAUAUCUAGGGGAAUA	hsa-miR-10a-3p,CAAAUUC[G/A]UAUCUAGGGGAAUA	838	1848	786	63.1611
1138	hsa-miR-196a-5p	chr17	-	hsa-mir-196a-1	No	0
1139	hsa-miR-3185	chr17	-	hsa-mir-3185	No	2	rs757069417	48724462	T > G	0.000644	7	AGAAGAAGGCGGUCGGUCUGCGG	AGAAGACGGCGGUCGGUCUGCGG	hsa-miR-3185,AGAAGA[A/C]GGCGGUCGGUCUGCGG	1143	296	78	13.4099
1139	hsa-miR-3185	chr17	-	hsa-mir-3185	No	2	rs781039600	48724463	T > C	0.000643	6	AGAAGAAGGCGGUCGGUCUGCGG	AGAAGGAGGCGGUCGGUCUGCGG	hsa-miR-3185,AGAAG[A/G]AGGCGGUCGGUCUGCGG	1143	774	193	20.5194
1140	hsa-miR-6129	chr17	-	hsa-mir-6129	No	0
1141	hsa-miR-6165	chr17	+	hsa-mir-6165	No	0
1142	hsa-miR-8059	chr17	+	hsa-mir-8059	No	0
1143	hsa-miR-3614-5p	chr17	-	hsa-mir-3614	No	1	rs533715139	56891339	T > C	0.000346	3	CCACUUGGAUCUGAAGGCUGCCC	CCGCUUGGAUCUGAAGGCUGCCC	hsa-miR-3614-5p,CC[A/G]CUUGGAUCUGAAGGCUGCCC	481	36	5	3.79967
1144	hsa-miR-3614-3p	chr17	-	hsa-mir-3614	No	0
1145	hsa-miR-142-5p	chr17	-	hsa-mir-142	Yes (58331244-58336022:2:hetero:hsa-mir-142/hsa-mir-4736)	0
1146	hsa-miR-142-3p	chr17	-	hsa-mir-142	Yes (58331244-58336022:2:hetero:hsa-mir-142/hsa-mir-4736)	2	rs756348475	58331260	A > G	8e-06	8	UGUAGUGUUUCCUACUUUAUGGA	UGUAGUGCUUCCUACUUUAUGGA	hsa-miR-142-3p,UGUAGUG[U/C]UUCCUACUUUAUGGA	292	246	81	30.2222
1146	hsa-miR-142-3p	chr17	-	hsa-mir-142	Yes (58331244-58336022:2:hetero:hsa-mir-142/hsa-mir-4736)	2	rs562696473	58331264	T > G	0.0002	4	UGUAGUGUUUCCUACUUUAUGGA	UGUCGUGUUUCCUACUUUAUGGA	hsa-miR-142-3p,UGU[A/C]GUGUUUCCUACUUUAUGGA	292	30	1	1.06843
1147	hsa-miR-4736	chr17	-	hsa-mir-4736	Yes (58331244-58336022:2:hetero:hsa-mir-142/hsa-mir-4736)	0
1148	hsa-miR-454-5p	chr17	-	hsa-mir-454	No	1	rs769524485	59137845	A > G	8e-06	5	ACCCUAUCAAUAUUGUCUCUGC	ACCCCAUCAAUAUUGUCUCUGC	hsa-miR-454-5p,ACCC[U/C]AUCAAUAUUGUCUCUGC	213	613	24	6.64188
1149	hsa-miR-454-3p	chr17	-	hsa-mir-454	No	2	rs772555392	59137806	A > G	8e-06	4	UAGUGCAAUAUUGCUUAUAGGGU	UAGCGCAAUAUUGCUUAUAGGGU	hsa-miR-454-3p,UAG[U/C]GCAAUAUUGCUUAUAGGGU	728	39	4	2.3739
1149	hsa-miR-454-3p	chr17	-	hsa-mir-454	No	2	rs555225543	59137803	T > G	1.6e-05	7	UAGUGCAAUAUUGCUUAUAGGGU	UAGUGCCAUAUUGCUUAUAGGGU	hsa-miR-454-3p,UAGUGC[A/C]AUAUUGCUUAUAGGGU	728	301	57	12.1766
1150	hsa-miR-301a-3p	chr17	-	hsa-mir-301a	No	1	rs773052028	59151164	T > C	1.7e-05	8	CAGUGCAAUAGUAUUGUCAAAGC	CAGUGCAGUAGUAUUGUCAAAGC	hsa-miR-301a-3p,CAGUGCA[A/G]UAGUAUUGUCAAAGC	728	653	273	39.595
1151	hsa-miR-301a-5p	chr17	-	hsa-mir-301a	No	1	rs759528408	59151204	A > G	1.8e-05	5	GCUCUGACUUUAUUGCACUACU	GCUCCGACUUUAUUGCACUACU	hsa-miR-301a-5p,GCUC[U/C]GACUUUAUUGCACUACU	614	36	4	2.69045
1152	hsa-miR-4729	chr17	+	hsa-mir-4729	No	0
1153	hsa-miR-21-5p	chr17	+	hsa-mir-21	Yes (2049928-2050350:2:homo:hsa-mir-132/hsa-mir-212)	0
1154	hsa-miR-21-3p	chr17	+	hsa-mir-21	Yes (2049928-2050350:2:homo:hsa-mir-132/hsa-mir-212)	2	rs540457553	59841317	C > T	1.6e-05	7	CAACACCAGUCGAUGGGCUGU	CAACACUAGUCGAUGGGCUGU	hsa-miR-21-3p,CAACAC[C/U]AGUCGAUGGGCUGU	602	895	128	17.4381
1154	hsa-miR-21-3p	chr17	+	hsa-mir-21	Yes (2049928-2050350:2:homo:hsa-mir-132/hsa-mir-212)	2	rs772365223	59841316	C > G	8e-06	6	CAACACCAGUCGAUGGGCUGU	CAACAGCAGUCGAUGGGCUGU	hsa-miR-21-3p,CAACA[C/G]CAGUCGAUGGGCUGU	602	1053	136	17.0815
1155	hsa-miR-4737	chr17	-	hsa-mir-4737	No	2	rs111365058	60043095	A > G	0.020967	2	AUGCGAGGAUGCUGACAGUG	ACGCGAGGAUGCUGACAGUG	hsa-miR-4737,A[U/C]GCGAGGAUGCUGACAGUG	28	9	0	0
1155	hsa-miR-4737	chr17	-	hsa-mir-4737	No	2	rs528487423	60043092	C > T	0.0002	5	AUGCGAGGAUGCUGACAGUG	AUGCAAGGAUGCUGACAGUG	hsa-miR-4737,AUGC[G/A]AGGAUGCUGACAGUG	28	440	4	3.60375
1156	hsa-miR-633	chr17	+	hsa-mir-633	No	1	rs760939460	62944279	T > C	1.1e-05	5	CUAAUAGUAUCUACCACAAUAAA	CUAACAGUAUCUACCACAAUAAA	hsa-miR-633,CUAA[U/C]AGUAUCUACCACAAUAAA	723	941	148	17.9431
1157	hsa-miR-1273e	chr17	-	hsa-mir-1273e	No	0
1158	hsa-miR-3064-5p	chr17	-	hsa-mir-3064	Yes (64500774-64501250:2:hetero:hsa-mir-3064/hsa-mir-5047)	0
1159	hsa-miR-3064-3p	chr17	-	hsa-mir-3064	Yes (64500774-64501250:2:hetero:hsa-mir-3064/hsa-mir-5047)	0
1160	hsa-miR-5047	chr17	-	hsa-mir-5047	Yes (64500774-64501250:2:hetero:hsa-mir-3064/hsa-mir-5047)	0
1161	hsa-miR-6080	chr17	+	hsa-mir-6080	No	0
1162	hsa-miR-4315	chr17	-	hsa-mir-4315-2	No	2	rs769415631	64822091	G > A	8e-06	2	CCGCUUUCUGAGCUGGAC	CUGCUUUCUGAGCUGGAC	hsa-miR-4315,C[C/U]GCUUUCUGAGCUGGAC	64	1504	14	4.51247
1162	hsa-miR-4315	chr17	-	hsa-mir-4315-2	No	2	rs748118619	64822090	C > T	0.000777	3	CCGCUUUCUGAGCUGGAC	CCACUUUCUGAGCUGGAC	hsa-miR-4315,CC[G/A]CUUUCUGAGCUGGAC	64	1136	16	5.93391
1163	hsa-miR-634	chr17	+	hsa-mir-634	No	0
1164	hsa-miR-548d-5p	chr17	-	hsa-mir-548d-2	No	1	rs768094101	67471554	T > G	1.1e-05	8	AAAAGUAAUUGUGGUUUUUGCC	AAAAGUACUUGUGGUUUUUGCC	hsa-miR-548d-5p,AAAAGUA[A/C]UUGUGGUUUUUGCC	1737	1341	884	57.9213
1165	hsa-miR-548d-3p	chr17	-	hsa-mir-548d-2	No	2	rs755063467	67471518	G > A	3.2e-05	8	CAAAAACCACAGUUUCUUUUGC	CAAAAACUACAGUUUCUUUUGC	hsa-miR-548d-3p,CAAAAAC[C/U]ACAGUUUCUUUUGC	2820	2921	2149	74.8766
1165	hsa-miR-548d-3p	chr17	-	hsa-mir-548d-2	No	2	rs777868440	67471520	T > G	3e-05	6	CAAAAACCACAGUUUCUUUUGC	CAAAACCCACAGUUUCUUUUGC	hsa-miR-548d-3p,CAAAA[A/C]CCACAGUUUCUUUUGC	2820	1459	883	43.532
1166	hsa-miR-548aa	chr17	+	hsa-mir-548aa-2	No	2	rs771797645	67471545	A > G	1.3e-05	3	AAAAACCACAAUUACUUUUGCACCA	AAGAACCACAAUUACUUUUGCACCA	hsa-miR-548aa,AA[A/G]AACCACAAUUACUUUUGCACCA	1885	491	173	17.9825
1166	hsa-miR-548aa	chr17	+	hsa-mir-548aa-2	No	2	rs149172942	67471549	C > T	2.2e-05	7	AAAAACCACAAUUACUUUUGCACCA	AAAAACUACAAUUACUUUUGCACCA	hsa-miR-548aa,AAAAAC[C/U]ACAAUUACUUUUGCACCA	1885	2146	737	36.6435
1167	hsa-miR-635	chr17	-	hsa-mir-635	No	0
1168	hsa-miR-4524b-5p	chr17	+	hsa-mir-4524b	No	1	rs533917606	69099574	C > T	0.0002	5	AUAGCAGCAUAAGCCUGUCUC	AUAGUAGCAUAAGCCUGUCUC	hsa-miR-4524b-5p,AUAG[C/U]AGCAUAAGCCUGUCUC	501	285	34	8.99783
1169	hsa-miR-4524b-3p	chr17	+	hsa-mir-4524b	No	0
1170	hsa-miR-4524a-5p	chr17	-	hsa-mir-4524a	No	0
1171	hsa-miR-4524a-3p	chr17	-	hsa-mir-4524a	No	0
1172	hsa-miR-3615	chr17	+	hsa-mir-3615	No	1	rs112977728	74748666	C > T	0.002396	4	UCUCUCGGCUCCUCGCGGCUC	UCUUUCGGCUCCUCGCGGCUC	hsa-miR-3615,UCU[C/U]UCGGCUCCUCGCGGCUC	61	45	0	0
1173	hsa-miR-3678-5p	chr17	+	hsa-mir-3678	No	0
1174	hsa-miR-3678-3p	chr17	+	hsa-mir-3678	No	0
1175	hsa-miR-6785-5p	chr17	+	hsa-mir-6785	No	0
1176	hsa-miR-6785-3p	chr17	+	hsa-mir-6785	No	3	rs569282879	75498612	C > T	8.1e-05	5	ACAUCGCCCCACCUUCCCCAG	ACAUUGCCCCACCUUCCCCAG	hsa-miR-6785-3p,ACAU[C/U]GCCCCACCUUCCCCAG	30	381	1	0.935356
1176	hsa-miR-6785-3p	chr17	+	hsa-mir-6785	No	3	rs375090254	75498613	G > A	0.000154	6	ACAUCGCCCCACCUUCCCCAG	ACAUCACCCCACCUUCCCCAG	hsa-miR-6785-3p,ACAUC[G/A]CCCCACCUUCCCCAG	30	511	3	2.42298
1176	hsa-miR-6785-3p	chr17	+	hsa-mir-6785	No	3	rs370314987	75498610	A > G	3.4e-05	3	ACAUCGCCCCACCUUCCCCAG	ACGUCGCCCCACCUUCCCCAG	hsa-miR-6785-3p,AC[A/G]UCGCCCCACCUUCCCCAG	30	6	0	0
1177	hsa-miR-4738-5p	chr17	-	hsa-mir-4738	No	1	rs755323050	75784587	G > C	5e-05	2	ACCAGCGCGUUUUCAGUUUCAU	AGCAGCGCGUUUUCAGUUUCAU	hsa-miR-4738-5p,A[C/G]CAGCGCGUUUUCAGUUUCAU	54	62	2	3.45651
1178	hsa-miR-4738-3p	chr17	-	hsa-mir-4738	No	2	rs144216044	75784546	G > A	0.002022	6	UGAAACUGGAGCGCCUGGAGGA	UGAAAUUGGAGCGCCUGGAGGA	hsa-miR-4738-3p,UGAAA[C/U]UGGAGCGCCUGGAGGA	890	1111	234	23.5323
1178	hsa-miR-4738-3p	chr17	-	hsa-mir-4738	No	2	rs548799194	75784544	C > T	0.0002	8	UGAAACUGGAGCGCCUGGAGGA	UGAAACUAGAGCGCCUGGAGGA	hsa-miR-4738-3p,UGAAACU[G/A]GAGCGCCUGGAGGA	890	822	423	49.4549
1179	hsa-miR-6868-5p	chr17	-	hsa-mir-6868	No	1	rs745531322	76098068	C > T	3.2e-05	4	ACUGGCAGAACACUGAAGCAGC	ACUAGCAGAACACUGAAGCAGC	hsa-miR-6868-5p,ACU[G/A]GCAGAACACUGAAGCAGC	607	335	32	7.09632
1180	hsa-miR-6868-3p	chr17	-	hsa-mir-6868	No	0
1181	hsa-miR-636	chr17	-	hsa-mir-636	No	2	rs377063669	76736487	C > T	4.4e-05	2	UGUGCUUGCUCGUCCCGCCCGCA	UAUGCUUGCUCGUCCCGCCCGCA	hsa-miR-636,U[G/A]UGCUUGCUCGUCCCGCCCGCA	515	601	74	13.3012
1181	hsa-miR-636	chr17	-	hsa-mir-636	No	2	rs772803565	76736482	A > G	9e-06	7	UGUGCUUGCUCGUCCCGCCCGCA	UGUGCUCGCUCGUCCCGCCCGCA	hsa-miR-636,UGUGCU[U/C]GCUCGUCCCGCCCGCA	515	110	18	7.56262
1182	hsa-miR-6516-5p	chr17	+	hsa-mir-6516	No	0
1183	hsa-miR-6516-3p	chr17	+	hsa-mir-6516	No	3	rs778958991	77089471	C > G	9e-06	3	AUCAUGUAUGAUACUGCAAACA	AUGAUGUAUGAUACUGCAAACA	hsa-miR-6516-3p,AU[C/G]AUGUAUGAUACUGCAAACA	734	526	88	14.1626
1183	hsa-miR-6516-3p	chr17	+	hsa-mir-6516	No	3	rs201524670	77089472	A > G	1.7e-05	4	AUCAUGUAUGAUACUGCAAACA	AUCGUGUAUGAUACUGCAAACA	hsa-miR-6516-3p,AUC[A/G]UGUAUGAUACUGCAAACA	734	43	7	3.94018
1183	hsa-miR-6516-3p	chr17	+	hsa-mir-6516	No	3	rs771695677	77089475	T > C	9e-06	7	AUCAUGUAUGAUACUGCAAACA	AUCAUGCAUGAUACUGCAAACA	hsa-miR-6516-3p,AUCAUG[U/C]AUGAUACUGCAAACA	734	577	103	15.8271
1184	hsa-miR-4316	chr17	-	hsa-mir-4316	No	0
1185	hsa-miR-4739	chr17	-	hsa-mir-4739	No	0
1186	hsa-miR-1268b	chr17	+	hsa-mir-1268b	No	1	rs532706583	80098836	G > A	0.0002	6	CGGGCGUGGUGGUGGGGGUG	CGGGCAUGGUGGUGGGGGUG	hsa-miR-1268b,CGGGC[G/A]UGGUGGUGGGGGUG	59	359	0	0
1187	hsa-miR-4730	chr17	+	hsa-mir-4730	No	1	rs534052840	80419431	C > T	0.000573	5	CUGGCGGAGCCCAUUCCAUGCCA	CUGGUGGAGCCCAUUCCAUGCCA	hsa-miR-4730,CUGG[C/U]GGAGCCCAUUCCAUGCCA	33	518	2	1.52971
1188	hsa-miR-657	chr17	-	hsa-mir-657	Yes (81125290-81133285:3:hetero:hsa-mir-657/hsa-mir-338/hsa-mir-1250)	0
1189	hsa-miR-3065-5p	chr17	+	hsa-mir-3065	Yes (81125290-81133285:3:hetero:hsa-mir-657/hsa-mir-338/hsa-mir-1250)	0
1190	hsa-miR-3065-3p	chr17	+	hsa-mir-3065	Yes (81125290-81133285:3:hetero:hsa-mir-657/hsa-mir-338/hsa-mir-1250)	0
1191	hsa-miR-338-5p	chr17	-	hsa-mir-338	Yes (81125290-81133285:3:hetero:hsa-mir-657/hsa-mir-338/hsa-mir-1250)	1	rs766400159	81125938	T > C	9e-06	7	AACAAUAUCCUGGUGCUGAGUG	AACAAUGUCCUGGUGCUGAGUG	hsa-miR-338-5p,AACAAU[A/G]UCCUGGUGCUGAGUG	1541	1001	333	26.8118
1192	hsa-miR-338-3p	chr17	-	hsa-mir-338	Yes (81125290-81133285:3:hetero:hsa-mir-657/hsa-mir-338/hsa-mir-1250)	0
1193	hsa-miR-1250-5p	chr17	-	hsa-mir-1250	Yes (81125290-81133285:3:hetero:hsa-mir-657/hsa-mir-338/hsa-mir-1250)	2	rs373160603	81133283	C > T	5.9e-05	3	ACGGUGCUGGAUGUGGCCUUU	ACAGUGCUGGAUGUGGCCUUU	hsa-miR-1250-5p,AC[G/A]GUGCUGGAUGUGGCCUUU	45	579	5	3.09759
1193	hsa-miR-1250-5p	chr17	-	hsa-mir-1250	Yes (81125290-81133285:3:hetero:hsa-mir-657/hsa-mir-338/hsa-mir-1250)	2	rs376611669	81133284	G > A	0.000273	2	ACGGUGCUGGAUGUGGCCUUU	AUGGUGCUGGAUGUGGCCUUU	hsa-miR-1250-5p,A[C/U]GGUGCUGGAUGUGGCCUUU	45	311	2	1.69061
1194	hsa-miR-1250-3p	chr17	-	hsa-mir-1250	Yes (81125290-81133285:3:hetero:hsa-mir-657/hsa-mir-338/hsa-mir-1250)	0
1195	hsa-miR-4740-5p	chr17	-	hsa-mir-4740	No	0
1196	hsa-miR-4740-3p	chr17	-	hsa-mir-4740	No	0
1197	hsa-miR-3186-5p	chr17	-	hsa-mir-3186	No	1	rs782159392	81451168	C > T	0.000695	6	CAGGCGUCUGUCUACGUGGCUU	CAGGCAUCUGUCUACGUGGCUU	hsa-miR-3186-5p,CAGGC[G/A]UCUGUCUACGUGGCUU	31	416	2	1.76117
1198	hsa-miR-3186-3p	chr17	-	hsa-mir-3186	No	0
1199	hsa-miR-6786-5p	chr17	+	hsa-mir-6786	No	2	rs561199538	81693811	G > A	3.5e-05	3	GCGGUGGGGCCGGAGGGGCGU	GCAGUGGGGCCGGAGGGGCGU	hsa-miR-6786-5p,GC[G/A]GUGGGGCCGGAGGGGCGU	56	601	5	2.72545
1199	hsa-miR-6786-5p	chr17	+	hsa-mir-6786	No	2	rs751003627	81693810	C > T	4.1e-05	2	GCGGUGGGGCCGGAGGGGCGU	GUGGUGGGGCCGGAGGGGCGU	hsa-miR-6786-5p,G[C/U]GGUGGGGCCGGAGGGGCGU	56	585	8	4.41996
1200	hsa-miR-6786-3p	chr17	+	hsa-mir-6786	No	1	rs768786503	81693848	G > A	0.000144	5	UGACGCCCCUUCUGAUUCUGCCU	UGACACCCCUUCUGAUUCUGCCU	hsa-miR-6786-3p,UGAC[G/A]CCCCUUCUGAUUCUGCCU	33	282	0	0
1201	hsa-miR-6787-5p	chr17	+	hsa-mir-6787	No	2	rs760060985	82236680	G > A	1.8e-05	8	UGGCGGGGGUAGAGCUGGCUGC	UGGCGGGAGUAGAGCUGGCUGC	hsa-miR-6787-5p,UGGCGGG[G/A]GUAGAGCUGGCUGC	216	119	66	41.1665
1201	hsa-miR-6787-5p	chr17	+	hsa-mir-6787	No	2	rs776925052	82236679	G > T	9e-06	7	UGGCGGGGGUAGAGCUGGCUGC	UGGCGGUGGUAGAGCUGGCUGC	hsa-miR-6787-5p,UGGCGG[G/U]GGUAGAGCUGGCUGC	216	60	3	2.63523
1202	hsa-miR-6787-3p	chr17	+	hsa-mir-6787	No	4	rs528876687	82236710	C > G	1.6e-05	4	UCUCAGCUGCUGCCCUCUCCAG	UCUGAGCUGCUGCCCUCUCCAG	hsa-miR-6787-3p,UCU[C/G]AGCUGCUGCCCUCUCCAG	709	502	68	11.3981
1202	hsa-miR-6787-3p	chr17	+	hsa-mir-6787	No	4	rs750093533	82236709	T > C	9e-06	3	UCUCAGCUGCUGCCCUCUCCAG	UCCCAGCUGCUGCCCUCUCCAG	hsa-miR-6787-3p,UC[U/C]CAGCUGCUGCCCUCUCCAG	709	1369	189	19.1839
1202	hsa-miR-6787-3p	chr17	+	hsa-mir-6787	No	4	rs780015175	82236711	A > T	1.7e-05	5	UCUCAGCUGCUGCCCUCUCCAG	UCUCUGCUGCUGCCCUCUCCAG	hsa-miR-6787-3p,UCUC[A/U]GCUGCUGCCCUCUCCAG	709	732	102	14.1586
1202	hsa-miR-6787-3p	chr17	+	hsa-mir-6787	No	4	rs12941300	82236708	C > A	0.001894	2	UCUCAGCUGCUGCCCUCUCCAG	UAUCAGCUGCUGCCCUCUCCAG	hsa-miR-6787-3p,U[C/A]UCAGCUGCUGCCCUCUCCAG	709	403	46	8.60562
1203	hsa-miR-4525	chr17	-	hsa-mir-4525	No	0
1204	hsa-miR-8078	chr18	-	hsa-mir-8078	No	2	rs781412688	112284	A > T	0.003031	5	GGUCUAGGCCCGGUGAGAGACUC	GGUCAAGGCCCGGUGAGAGACUC	hsa-miR-8078,GGUC[U/A]AGGCCCGGUGAGAGACUC	190	367	12	4.54435
1204	hsa-miR-8078	chr18	-	hsa-mir-8078	No	2	rs777486458	112282	C > A	0.000863	7	GGUCUAGGCCCGGUGAGAGACUC	GGUCUAUGCCCGGUGAGAGACUC	hsa-miR-8078,GGUCUA[G/U]GCCCGGUGAGAGACUC	190	301	10	4.18158
1205	hsa-miR-6718-5p	chr18	+	hsa-mir-6718	No	0
1206	hsa-miR-3976	chr18	+	hsa-mir-3976	No	0
1207	hsa-miR-4317	chr18	-	hsa-mir-4317	No	0
1208	hsa-miR-6788-5p	chr18	-	hsa-mir-6788	No	0
1209	hsa-miR-6788-3p	chr18	-	hsa-mir-6788	No	2	rs767013597	10759602	C > T	5.1e-05	4	UUCGCCACUUCCCUCCCUGCAG	UUCACCACUUCCCUCCCUGCAG	hsa-miR-6788-3p,UUC[G/A]CCACUUCCCUCCCUGCAG	31	549	1	0.766537
1209	hsa-miR-6788-3p	chr18	-	hsa-mir-6788	No	2	rs115219828	10759603	G > A	0.001739	3	UUCGCCACUUCCCUCCCUGCAG	UUUGCCACUUCCCUCCCUGCAG	hsa-miR-6788-3p,UU[C/U]GCCACUUCCCUCCCUGCAG	31	618	3	2.16744
1210	hsa-miR-7153-5p	chr18	-	hsa-mir-7153	No	0
1211	hsa-miR-7153-3p	chr18	-	hsa-mir-7153	No	1	rs537894004	11654898	T > C	0.000399	5	CACCAUGGACGGUUUACC	CACCGUGGACGGUUUACC	hsa-miR-7153-3p,CACC[A/G]UGGACGGUUUACC	392	33	4	3.5169
1212	hsa-miR-5190	chr18	+	hsa-mir-5190	No	0
1213	hsa-miR-4526	chr18	+	hsa-mir-4526	No	0
1214	hsa-miR-3156-5p	chr18	+	hsa-mir-3156-2	No	0
1215	hsa-miR-3156-3p	chr18	+	hsa-mir-3156-2	No	0
1216	hsa-miR-320c	chr18	+	hsa-mir-320c-1	No	1	rs748166297	21683564	C > G	8e-06	6	AAAAGCUGGGUUGAGAGGGU	AAAAGGUGGGUUGAGAGGGU	hsa-miR-320c,AAAAG[C/G]UGGGUUGAGAGGGU	1097	777	180	19.4966
1217	hsa-miR-133a-3p	chr18	-	hsa-mir-133a-1	Yes (21825711-21829036:2:hetero:hsa-mir-133a/hsa-mir-1)	0
1218	hsa-miR-133a-5p	chr18	-	hsa-mir-133a-1	Yes (21825711-21829036:2:hetero:hsa-mir-133a/hsa-mir-1)	0
1219	hsa-miR-1-3p	chr18	-	hsa-mir-1-2	Yes (21825711-21829036:2:hetero:hsa-mir-133a/hsa-mir-1)	0
1220	hsa-miR-4741	chr18	+	hsa-mir-4741	No	4	rs7227168	22933411	C > T	0.142173	5	CGGGCUGUCCGGAGGGGUCGGCU	CGGGUUGUCCGGAGGGGUCGGCU	hsa-miR-4741,CGGG[C/U]UGUCCGGAGGGGUCGGCU	666	233	24	6.09251
1220	hsa-miR-4741	chr18	+	hsa-mir-4741	No	4	rs115479920	22933413	G > A	0.002796	7	CGGGCUGUCCGGAGGGGUCGGCU	CGGGCUAUCCGGAGGGGUCGGCU	hsa-miR-4741,CGGGCU[G/A]UCCGGAGGGGUCGGCU	666	200	21	5.75396
1220	hsa-miR-4741	chr18	+	hsa-mir-4741	No	4	rs561516318	22933414	T > G	0.000599	8	CGGGCUGUCCGGAGGGGUCGGCU	CGGGCUGGCCGGAGGGGUCGGCU	hsa-miR-4741,CGGGCUG[U/G]CCGGAGGGGUCGGCU	666	944	423	53.3479
1220	hsa-miR-4741	chr18	+	hsa-mir-4741	No	4	rs559384120	22933408	G > T	0.0002	2	CGGGCUGUCCGGAGGGGUCGGCU	CUGGCUGUCCGGAGGGGUCGGCU	hsa-miR-4741,C[G/U]GGCUGUCCGGAGGGGUCGGCU	666	617	107	16.6918
1221	hsa-miR-320c	chr18	+	hsa-mir-320c-2	No	0
1222	hsa-miR-8057	chr18	-	hsa-mir-8057	No	0
1223	hsa-miR-302f	chr18	+	hsa-mir-302f	No	0
1224	hsa-miR-3975	chr18	+	hsa-mir-3975	No	1	rs532276633	35591785	G > A	0.001198	4	UGAGGCUAAUGCACUACUUCAC	UGAAGCUAAUGCACUACUUCAC	hsa-miR-3975,UGA[G/A]GCUAAUGCACUACUUCAC	450	475	39	8.43551
1225	hsa-miR-187-5p	chr18	-	hsa-mir-187	No	1	rs765955640	35904886	T > C	2.8e-05	7	GGCUACAACACAGGACCCGGGC	GGCUACGACACAGGACCCGGGC	hsa-miR-187-5p,GGCUAC[A/G]ACACAGGACCCGGGC	577	30	2	1.52013
1226	hsa-miR-187-3p	chr18	-	hsa-mir-187	No	1	rs775590170	35904854	C > T	3.3e-05	3	UCGUGUCUUGUGUUGCAGCCGG	UCAUGUCUUGUGUUGCAGCCGG	hsa-miR-187-3p,UC[G/A]UGUCUUGUGUUGCAGCCGG	56	460	8	4.98445
1227	hsa-miR-3929	chr18	-	hsa-mir-3929	No	0
1228	hsa-miR-4318	chr18	+	hsa-mir-4318	No	1	rs753426994	37657192	T > C	0.000192	4	CACUGUGGGUACAUGCU	CACCGUGGGUACAUGCU	hsa-miR-4318,CAC[U/C]GUGGGUACAUGCU	569	33	4	2.91909
1229	hsa-miR-924	chr18	-	hsa-mir-924	No	0
1230	hsa-miR-5583-5p	chr18	-	hsa-mir-5583-2	No	0
1231	hsa-miR-5583-3p	chr18	-	hsa-mir-5583-2	No	0
1232	hsa-miR-5583-5p	chr18	+	hsa-mir-5583-1	No	0
1233	hsa-miR-5583-3p	chr18	+	hsa-mir-5583-1	No	0
1234	hsa-miR-4319	chr18	-	hsa-mir-4319	No	1	rs572003295	44970152	A > G	0.0002	5	UCCCUGAGCAAAGCCAC	UCCCCGAGCAAAGCCAC	hsa-miR-4319,UCCC[U/C]GAGCAAAGCCAC	549	74	5	2.48066
1235	hsa-miR-4527	chr18	+	hsa-mir-4527	No	0
1236	hsa-miR-4743-5p	chr18	+	hsa-mir-4743	No	2	rs777856459	48670607	G > A	1.8e-05	6	UGGCCGGAUGGGACAGGAGGCAU	UGGCCAGAUGGGACAGGAGGCAU	hsa-miR-4743-5p,UGGCC[G/A]GAUGGGACAGGAGGCAU	70	737	10	4.40268
1236	hsa-miR-4743-5p	chr18	+	hsa-mir-4743	No	2	rs141766192	48670606	C > T	0.001034	5	UGGCCGGAUGGGACAGGAGGCAU	UGGCUGGAUGGGACAGGAGGCAU	hsa-miR-4743-5p,UGGC[C/U]GGAUGGGACAGGAGGCAU	70	1028	22	8.20119
1237	hsa-miR-4743-3p	chr18	+	hsa-mir-4743	No	2	rs772903719	48670652	T > C	8e-06	5	UUUCUGUCUUUUCUGGUCCAG	UUUCCGUCUUUUCUGGUCCAG	hsa-miR-4743-3p,UUUC[U/C]GUCUUUUCUGGUCCAG	1189	67	11	3.8973
1237	hsa-miR-4743-3p	chr18	+	hsa-mir-4743	No	2	rs771863567	48670651	C > T	1.6e-05	4	UUUCUGUCUUUUCUGGUCCAG	UUUUUGUCUUUUCUGGUCCAG	hsa-miR-4743-3p,UUU[C/U]UGUCUUUUCUGGUCCAG	1189	1844	434	29.3102
1238	hsa-miR-4744	chr18	-	hsa-mir-4744	No	0
1239	hsa-miR-1539	chr18	+	hsa-mir-1539	No	1	rs574136841	49487407	C > T	0.00055	6	UCCUGCGCGUCCCAGAUGCCC	UCCUGUGCGUCCCAGAUGCCC	hsa-miR-1539,UCCUG[C/U]GCGUCCCAGAUGCCC	55	497	10	6.0484
1240	hsa-miR-4320	chr18	-	hsa-mir-4320	No	0
1241	hsa-miR-4528	chr18	+	hsa-mir-4528	No	0
1242	hsa-miR-4529-5p	chr18	+	hsa-mir-4529	No	0
1243	hsa-miR-4529-3p	chr18	+	hsa-mir-4529	No	1	rs111734691	55479274	G > A	0.5	5	AUUGGACUGCUGAUGGCCCGU	AUUGAACUGCUGAUGGCCCGU	hsa-miR-4529-3p,AUUG[G/A]ACUGCUGAUGGCCCGU	350	584	46	10.1746
1244	hsa-miR-122-5p	chr18	+	hsa-mir-122	No	0
1245	hsa-miR-122-3p	chr18	+	hsa-mir-122	No	3	rs41292412	58451126	C > T	0.007755	3	AACGCCAUUAUCACACUAAAUA	AAUGCCAUUAUCACACUAAAUA	hsa-miR-122-3p,AA[C/U]GCCAUUAUCACACUAAAUA	33	549	4	2.97178
1245	hsa-miR-122-3p	chr18	+	hsa-mir-122	No	3	rs554204767	58451127	G > A	0.000397	4	AACGCCAUUAUCACACUAAAUA	AACACCAUUAUCACACUAAAUA	hsa-miR-122-3p,AAC[G/A]CCAUUAUCACACUAAAUA	33	524	4	3.04185
1245	hsa-miR-122-3p	chr18	+	hsa-mir-122	No	3	rs755220609	58451130	A > G	1.6e-05	7	AACGCCAUUAUCACACUAAAUA	AACGCCGUUAUCACACUAAAUA	hsa-miR-122-3p,AACGCC[A/G]UUAUCACACUAAAUA	33	3	0	0
1246	hsa-miR-3591-5p	chr18	-	hsa-mir-3591	No	0
1247	hsa-miR-3591-3p	chr18	-	hsa-mir-3591	No	0
1248	hsa-miR-5011-5p	chr18	+	hsa-mir-5011	No	1	rs536289369	67081613	T > C	0.0002	7	UAUAUAUACAGCCAUGCACUC	UAUAUACACAGCCAUGCACUC	hsa-miR-5011-5p,UAUAUA[U/C]ACAGCCAUGCACUC	2580	1927	1000	44.8486
1249	hsa-miR-5011-3p	chr18	+	hsa-mir-5011	No	0
1250	hsa-miR-548av-5p	chr18	-	hsa-mir-548av	No	0
1251	hsa-miR-548av-3p	chr18	-	hsa-mir-548av	No	0
1252	hsa-miR-1302	chr19	+	hsa-mir-1302-11	No	0
1253	hsa-miR-4745-5p	chr19	+	hsa-mir-4745	Yes (804940-813646:2:hetero:hsa-mir-4745/hsa-mir-3187)	1	rs569478349	804947	G > C	4e-05	7	UGAGUGGGGCUCCCGGGACGGCG	UGAGUGCGGCUCCCGGGACGGCG	hsa-miR-4745-5p,UGAGUG[G/C]GGCUCCCGGGACGGCG	395	84	3	1.64696
1254	hsa-miR-4745-3p	chr19	+	hsa-mir-4745	Yes (804940-813646:2:hetero:hsa-mir-4745/hsa-mir-3187)	1	rs780895451	804982	C > T	2.5e-05	6	UGGCCCGGCGACGUCUCACGGUC	UGGCCUGGCGACGUCUCACGGUC	hsa-miR-4745-3p,UGGCC[C/U]GGCGACGUCUCACGGUC	64	707	8	3.76089
1255	hsa-miR-3187-3p	chr19	+	hsa-mir-3187	Yes (804940-813646:2:hetero:hsa-mir-4745/hsa-mir-3187)	0
1256	hsa-miR-3187-5p	chr19	+	hsa-mir-3187	Yes (804940-813646:2:hetero:hsa-mir-4745/hsa-mir-3187)	1	rs756868110	813595	G > A	7.4e-05	6	CCUGGGCAGCGUGUGGCUGAAGG	CCUGGACAGCGUGUGGCUGAAGG	hsa-miR-3187-5p,CCUGG[G/A]CAGCGUGUGGCUGAAGG	876	434	70	11.3528
1257	hsa-miR-1909-5p	chr19	-	hsa-mir-1909	No	1	rs369050526	1816216	G > A	7e-05	8	UGAGUGCCGGUGCCUGCCCUG	UGAGUGCUGGUGCCUGCCCUG	hsa-miR-1909-5p,UGAGUGC[C/U]GGUGCCUGCCCUG	259	266	76	28.955
1258	hsa-miR-1909-3p	chr19	-	hsa-mir-1909	No	1	rs562400060	1816189	C > T	4.4e-05	2	CGCAGGGGCCGGGUGCUCACCG	CACAGGGGCCGGGUGCUCACCG	hsa-miR-1909-3p,C[G/A]CAGGGGCCGGGUGCUCACCG	854	454	106	17.0235
1259	hsa-miR-1227-3p	chr19	-	hsa-mir-1227	Yes (2234061-2235922:2:hetero:hsa-mir-1227/hsa-mir-6789)	3	rs752507244	2234074	G > A	8e-06	8	CGUGCCACCCUUUUCCCCAG	CGUGCCAUCCUUUUCCCCAG	hsa-miR-1227-3p,CGUGCCA[C/U]CCUUUUCCCCAG	408	379	129	32.805
1259	hsa-miR-1227-3p	chr19	-	hsa-mir-1227	Yes (2234061-2235922:2:hetero:hsa-mir-1227/hsa-mir-6789)	3	rs778090233	2234080	C > T	8e-06	2	CGUGCCACCCUUUUCCCCAG	CAUGCCACCCUUUUCCCCAG	hsa-miR-1227-3p,C[G/A]UGCCACCCUUUUCCCCAG	408	525	35	7.56238
1259	hsa-miR-1227-3p	chr19	-	hsa-mir-1227	Yes (2234061-2235922:2:hetero:hsa-mir-1227/hsa-mir-6789)	3	rs756001884	2234079	A > G	8e-06	3	CGUGCCACCCUUUUCCCCAG	CGCGCCACCCUUUUCCCCAG	hsa-miR-1227-3p,CG[U/C]GCCACCCUUUUCCCCAG	408	45	2	1.47602
1260	hsa-miR-1227-5p	chr19	-	hsa-mir-1227	Yes (2234061-2235922:2:hetero:hsa-mir-1227/hsa-mir-6789)	3	rs371224445	2234144	C > A	8e-06	6	GUGGGGCCAGGCGGUGG	GUGGGUCCAGGCGGUGG	hsa-miR-1227-5p,GUGGG[G/U]CCAGGCGGUGG	571	262	33	8.53189
1260	hsa-miR-1227-5p	chr19	-	hsa-mir-1227	Yes (2234061-2235922:2:hetero:hsa-mir-1227/hsa-mir-6789)	3	rs112440628	2234147	C > G	0.5	3	GUGGGGCCAGGCGGUGG	GUCGGGCCAGGCGGUGG	hsa-miR-1227-5p,GU[G/C]GGGCCAGGCGGUGG	571	45	4	2.49537
1260	hsa-miR-1227-5p	chr19	-	hsa-mir-1227	Yes (2234061-2235922:2:hetero:hsa-mir-1227/hsa-mir-6789)	3	rs753732760	2234145	C > T	8e-06	5	GUGGGGCCAGGCGGUGG	GUGGAGCCAGGCGGUGG	hsa-miR-1227-5p,GUGG[G/A]GCCAGGCGGUGG	571	345	52	11.7159
1261	hsa-miR-6789-5p	chr19	-	hsa-mir-6789	Yes (2234061-2235922:2:hetero:hsa-mir-1227/hsa-mir-6789)	1	rs777715341	2235915	G > A	1.3e-05	8	GUAGGGGCGUCCCGGGCGCGCGGG	GUAGGGGUGUCCCGGGCGCGCGGG	hsa-miR-6789-5p,GUAGGGG[C/U]GUCCCGGGCGCGCGGG	203	180	56	29.2957
1262	hsa-miR-6789-3p	chr19	-	hsa-mir-6789	Yes (2234061-2235922:2:hetero:hsa-mir-1227/hsa-mir-6789)	1	rs768296809	2235842	G > T	9e-06	8	CGGCGCCCGUGUCUCCUCCAG	CGGCGCCAGUGUCUCCUCCAG	hsa-miR-6789-3p,CGGCGCC[C/A]GUGUCUCCUCCAG	53	48	4	7.93052
1263	hsa-miR-4321	chr19	+	hsa-mir-4321	No	3	rs754626804	2250692	C > T	8.2e-05	5	UUAGCGGUGGACCGCCCUGCG	UUAGUGGUGGACCGCCCUGCG	hsa-miR-4321,UUAG[C/U]GGUGGACCGCCCUGCG	15	306	0	0
1263	hsa-miR-4321	chr19	+	hsa-mir-4321	No	3	rs533710645	2250693	G > T	0.0002	6	UUAGCGGUGGACCGCCCUGCG	UUAGCUGUGGACCGCCCUGCG	hsa-miR-4321,UUAGC[G/U]GUGGACCGCCCUGCG	15	429	2	2.49319
1263	hsa-miR-4321	chr19	+	hsa-mir-4321	No	3	rs750827494	2250690	A > G	8.2e-05	3	UUAGCGGUGGACCGCCCUGCG	UUGGCGGUGGACCGCCCUGCG	hsa-miR-4321,UU[A/G]GCGGUGGACCGCCCUGCG	15	30	0	0
1264	hsa-miR-7108-5p	chr19	-	hsa-mir-7108	No	2	rs375918278	2434993	G > A	0.000717	8	GUGUGGCCGGCAGGCGGGUGG	GUGUGGCUGGCAGGCGGGUGG	hsa-miR-7108-5p,GUGUGGC[C/U]GGCAGGCGGGUGG	422	449	139	31.9327
1264	hsa-miR-7108-5p	chr19	-	hsa-mir-7108	No	2	rs760544062	2434995	C > A	9e-06	6	GUGUGGCCGGCAGGCGGGUGG	GUGUGUCCGGCAGGCGGGUGG	hsa-miR-7108-5p,GUGUG[G/U]CCGGCAGGCGGGUGG	422	417	25	5.95958
1265	hsa-miR-7108-3p	chr19	-	hsa-mir-7108	No	3	rs753974434	2434932	G > A	1.1e-05	2	ACCCGCCCGUCUCCCCACAG	AUCCGCCCGUCUCCCCACAG	hsa-miR-7108-3p,A[C/U]CCGCCCGUCUCCCCACAG	156	43	4	4.88386
1265	hsa-miR-7108-3p	chr19	-	hsa-mir-7108	No	3	rs777712102	2434930	G > A	0.000152	4	ACCCGCCCGUCUCCCCACAG	ACCUGCCCGUCUCCCCACAG	hsa-miR-7108-3p,ACC[C/U]GCCCGUCUCCCCACAG	156	931	44	11.5456
1265	hsa-miR-7108-3p	chr19	-	hsa-mir-7108	No	3	rs370425122	2434927	G > C	0.000342	7	ACCCGCCCGUCUCCCCACAG	ACCCGCGCGUCUCCCCACAG	hsa-miR-7108-3p,ACCCGC[C/G]CGUCUCCCCACAG	156	29	3	4.46026
1266	hsa-miR-7850-5p	chr19	+	hsa-mir-7850	No	0
1267	hsa-miR-637	chr19	-	hsa-mir-637	No	1	rs200224173	3961449	C > G	0.000482	4	ACUGGGGGCUUUCGGGCUCUGCGU	ACUCGGGGCUUUCGGGCUCUGCGU	hsa-miR-637,ACU[G/C]GGGGCUUUCGGGCUCUGCGU	1042	83	27	9.18102
1268	hsa-miR-4746-5p	chr19	+	hsa-mir-4746	No	2	rs762277377	4445989	G > A	1e-05	3	CCGGUCCCAGGAGAACCUGCAGA	CCAGUCCCAGGAGAACCUGCAGA	hsa-miR-4746-5p,CC[G/A]GUCCCAGGAGAACCUGCAGA	53	492	3	1.85781
1268	hsa-miR-4746-5p	chr19	+	hsa-mir-4746	No	2	rs777012898	4445988	C > T	1e-05	2	CCGGUCCCAGGAGAACCUGCAGA	CUGGUCCCAGGAGAACCUGCAGA	hsa-miR-4746-5p,C[C/U]GGUCCCAGGAGAACCUGCAGA	53	375	4	2.83731
1269	hsa-miR-4746-3p	chr19	+	hsa-mir-4746	No	2	rs373118368	4446024	G > A	1.8e-05	4	AGCGGUGCUCCUGCGGGCCGA	AGCAGUGCUCCUGCGGGCCGA	hsa-miR-4746-3p,AGC[G/A]GUGCUCCUGCGGGCCGA	44	585	5	3.11649
1269	hsa-miR-4746-3p	chr19	+	hsa-mir-4746	No	2	rs777668045	4446023	C > T	2.8e-05	3	AGCGGUGCUCCUGCGGGCCGA	AGUGGUGCUCCUGCGGGCCGA	hsa-miR-4746-3p,AG[C/U]GGUGCUCCUGCGGGCCGA	44	420	6	4.41367
1270	hsa-miR-7-5p	chr19	+	hsa-mir-7-3	No	0
1271	hsa-miR-4747-5p	chr19	+	hsa-mir-4747	No	0
1272	hsa-miR-4747-3p	chr19	+	hsa-mir-4747	No	3	rs779802464	4932720	A > C	9e-06	2	AAGGCCCGGGCUUUCCUCCCAG	ACGGCCCGGGCUUUCCUCCCAG	hsa-miR-4747-3p,A[A/C]GGCCCGGGCUUUCCUCCCAG	171	21	2	3.33751
1272	hsa-miR-4747-3p	chr19	+	hsa-mir-4747	No	3	rs747347309	4932722	G > A	1.7e-05	4	AAGGCCCGGGCUUUCCUCCCAG	AAGACCCGGGCUUUCCUCCCAG	hsa-miR-4747-3p,AAG[G/A]CCCGGGCUUUCCUCCCAG	171	87	11	9.01851
1272	hsa-miR-4747-3p	chr19	+	hsa-mir-4747	No	3	rs77046863	4932725	C > T	0.003252	7	AAGGCCCGGGCUUUCCUCCCAG	AAGGCCUGGGCUUUCCUCCCAG	hsa-miR-4747-3p,AAGGCC[C/U]GGGCUUUCCUCCCAG	171	368	31	12.3578
1273	hsa-miR-6885-5p	chr19	-	hsa-mir-6885	Yes (6389637-6392983:2:hetero:hsa-mir-6885/hsa-mir-6790)	4	rs767032487	6389692	C > T	9e-06	7	AGGGGGGCACUGCGCAAGCAAAGCC	AGGGGGACACUGCGCAAGCAAAGCC	hsa-miR-6885-5p,AGGGGG[G/A]CACUGCGCAAGCAAAGCC	606	615	123	20.148
1273	hsa-miR-6885-5p	chr19	-	hsa-mir-6885	Yes (6389637-6392983:2:hetero:hsa-mir-6885/hsa-mir-6790)	4	rs566814962	6389694	C > G	1.7e-05	5	AGGGGGGCACUGCGCAAGCAAAGCC	AGGGCGGCACUGCGCAAGCAAAGCC	hsa-miR-6885-5p,AGGG[G/C]GGCACUGCGCAAGCAAAGCC	606	157	28	9.07762
1273	hsa-miR-6885-5p	chr19	-	hsa-mir-6885	Yes (6389637-6392983:2:hetero:hsa-mir-6885/hsa-mir-6790)	4	rs539228700	6389695	C > A	0.000181	4	AGGGGGGCACUGCGCAAGCAAAGCC	AGGUGGGCACUGCGCAAGCAAAGCC	hsa-miR-6885-5p,AGG[G/U]GGGCACUGCGCAAGCAAAGCC	606	883	164	22.4196
1273	hsa-miR-6885-5p	chr19	-	hsa-mir-6885	Yes (6389637-6392983:2:hetero:hsa-mir-6885/hsa-mir-6790)	4	rs547090990	6389691	G > A	6e-05	8	AGGGGGGCACUGCGCAAGCAAAGCC	AGGGGGGUACUGCGCAAGCAAAGCC	hsa-miR-6885-5p,AGGGGGG[C/U]ACUGCGCAAGCAAAGCC	606	476	305	56.7885
1274	hsa-miR-6885-3p	chr19	-	hsa-mir-6885	Yes (6389637-6392983:2:hetero:hsa-mir-6885/hsa-mir-6790)	0
1275	hsa-miR-6790-5p	chr19	-	hsa-mir-6790	Yes (6389637-6392983:2:hetero:hsa-mir-6885/hsa-mir-6790)	0
1276	hsa-miR-6790-3p	chr19	-	hsa-mir-6790	Yes (6389637-6392983:2:hetero:hsa-mir-6885/hsa-mir-6790)	1	rs758723985	6392940	A > G	8e-06	6	CGACCUCGGCGACCCCUCACU	CGACCCCGGCGACCCCUCACU	hsa-miR-6790-3p,CGACC[U/C]CGGCGACCCCUCACU	150	122	4	2.95689
1277	hsa-miR-3940-3p	chr19	-	hsa-mir-3940	No	2	rs753266822	6416452	G > C	9e-06	4	CAGCCCGGAUCCCAGCCCACUU	CAGGCCGGAUCCCAGCCCACUU	hsa-miR-3940-3p,CAG[C/G]CCGGAUCCCAGCCCACUU	21	34	0	0
1277	hsa-miR-3940-3p	chr19	-	hsa-mir-3940	No	2	rs766893050	6416450	G > A	9e-06	6	CAGCCCGGAUCCCAGCCCACUU	CAGCCUGGAUCCCAGCCCACUU	hsa-miR-3940-3p,CAGCC[C/U]GGAUCCCAGCCCACUU	21	394	1	1.09937
1278	hsa-miR-3940-5p	chr19	-	hsa-mir-3940	No	1	rs748119109	6416487	C > T	9e-06	3	GUGGGUUGGGGCGGGCUCUG	GUAGGUUGGGGCGGGCUCUG	hsa-miR-3940-5p,GU[G/A]GGUUGGGGCGGGCUCUG	332	328	20	6.06072
1279	hsa-miR-6791-5p	chr19	-	hsa-mir-6791	No	0
1280	hsa-miR-6791-3p	chr19	-	hsa-mir-6791	No	1	rs200895660	6736731	C > A	0.0002	2	UGCCUCCUUGGUCUCCGGCAG	UUCCUCCUUGGUCUCCGGCAG	hsa-miR-6791-3p,U[G/U]CCUCCUUGGUCUCCGGCAG	581	869	103	14.4957
1281	hsa-miR-6792-5p	chr19	+	hsa-mir-6792	No	0
1282	hsa-miR-6792-3p	chr19	+	hsa-mir-6792	No	0
1283	hsa-miR-4999-5p	chr19	-	hsa-mir-4999	No	0
1284	hsa-miR-4999-3p	chr19	-	hsa-mir-4999	No	0
1285	hsa-miR-5589-5p	chr19	+	hsa-mir-5589	No	1	rs202101735	10038360	G > A	0.002796	7	GGCUGGGUGCUCUUGUGCAGU	GGCUGGAUGCUCUUGUGCAGU	hsa-miR-5589-5p,GGCUGG[G/A]UGCUCUUGUGCAGU	935	426	99	15.6864
1286	hsa-miR-5589-3p	chr19	+	hsa-mir-5589	No	1	rs116796353	10038396	A > G	0.040977	6	UGCACAUGGCAACCUAGCUCCCA	UGCACGUGGCAACCUAGCUCCCA	hsa-miR-5589-3p,UGCAC[A/G]UGGCAACCUAGCUCCCA	596	109	17	6.6698
1287	hsa-miR-4322	chr19	+	hsa-mir-4322	No	1	rs114399468	10230461	G > A	0.016614	7	CUGUGGGCUCAGCGCGUGGGG	CUGUGGACUCAGCGCGUGGGG	hsa-miR-4322,CUGUGG[G/A]CUCAGCGCGUGGGG	442	385	47	11.3935
1288	hsa-miR-1181	chr19	-	hsa-mir-1181	No	1	rs769124829	10403523	C > G	1.3e-05	3	CCGUCGCCGCCACCCGAGCCG	CCCUCGCCGCCACCCGAGCCG	hsa-miR-1181,CC[G/C]UCGCCGCCACCCGAGCCG	6	68	0	0
1289	hsa-miR-1238-3p	chr19	+	hsa-mir-1238	No	3	rs200136327	10552190	G > A	7.1e-05	8	CUUCCUCGUCUGUCUGCCCC	CUUCCUCAUCUGUCUGCCCC	hsa-miR-1238-3p,CUUCCUC[G/A]UCUGUCUGCCCC	555	1133	487	61.414
1289	hsa-miR-1238-3p	chr19	+	hsa-mir-1238	No	3	rs749131513	10552184	T > G	8e-06	2	CUUCCUCGUCUGUCUGCCCC	CGUCCUCGUCUGUCUGCCCC	hsa-miR-1238-3p,C[U/G]UCCUCGUCUGUCUGCCCC	555	129	20	7.47461
1289	hsa-miR-1238-3p	chr19	+	hsa-mir-1238	No	3	rs374913540	10552188	T > C	2.5e-05	6	CUUCCUCGUCUGUCUGCCCC	CUUCCCCGUCUGUCUGCCCC	hsa-miR-1238-3p,CUUCC[U/C]CGUCUGUCUGCCCC	555	506	86	16.2284
1290	hsa-miR-1238-5p	chr19	+	hsa-mir-1238	No	1	rs762841570	10552125	A > C	8e-06	4	GUGAGUGGGAGCCCCAGUGUGUG	GUGCGUGGGAGCCCCAGUGUGUG	hsa-miR-1238-5p,GUG[A/C]GUGGGAGCCCCAGUGUGUG	336	39	4	3.49428
1291	hsa-miR-638	chr19	+	hsa-mir-638	No	2	rs758285276	10718424	T > G	4.6e-05	6	AGGGAUCGCGGGCGGGUGGCGGCCU	AGGGAGCGCGGGCGGGUGGCGGCCU	hsa-miR-638,AGGGA[U/G]CGCGGGCGGGUGGCGGCCU	67	204	3	2.56607
1291	hsa-miR-638	chr19	+	hsa-mir-638	No	2	rs750408293	10718423	A > G	2.3e-05	5	AGGGAUCGCGGGCGGGUGGCGGCCU	AGGGGUCGCGGGCGGGUGGCGGCCU	hsa-miR-638,AGGG[A/G]UCGCGGGCGGGUGGCGGCCU	67	110	0	0
1292	hsa-miR-4748	chr19	+	hsa-mir-4748	No	0
1293	hsa-miR-199a-5p	chr19	-	hsa-mir-199a-1	No	1	rs754070987	10817490	G > T	3.9e-05	2	CCCAGUGUUCAGACUACCUGUUC	CACAGUGUUCAGACUACCUGUUC	hsa-miR-199a-5p,C[C/A]CAGUGUUCAGACUACCUGUUC	565	801	93	13.8243
1294	hsa-miR-199a-3p	chr19	-	hsa-mir-199a-1	No	2	rs183664554	10817443	A > G	0.003691	8	ACAGUAGUCUGCACAUUGGUUA	ACAGUAGCCUGCACAUUGGUUA	hsa-miR-199a-3p,ACAGUAG[U/C]CUGCACAUUGGUUA	490	416	150	33.2236
1294	hsa-miR-199a-3p	chr19	-	hsa-mir-199a-1	No	2	rs776326431	10817446	A > G	2.4e-05	5	ACAGUAGUCUGCACAUUGGUUA	ACAGCAGUCUGCACAUUGGUUA	hsa-miR-199a-3p,ACAG[U/C]AGUCUGCACAUUGGUUA	490	1006	87	12.3915
1295	hsa-miR-6793-5p	chr19	+	hsa-mir-6793	No	0
1296	hsa-miR-6793-3p	chr19	+	hsa-mir-6793	No	0
1297	hsa-miR-6886-5p	chr19	+	hsa-mir-6886	No	2	rs201118690	11113480	C > T	2.4e-05	2	CCCGCAGGUGAGAUGAGGGCU	CUCGCAGGUGAGAUGAGGGCU	hsa-miR-6886-5p,C[C/U]CGCAGGUGAGAUGAGGGCU	63	30	0	0
1297	hsa-miR-6886-5p	chr19	+	hsa-mir-6886	No	2	rs6413505	11113481	C > T	0.019911	3	CCCGCAGGUGAGAUGAGGGCU	CCUGCAGGUGAGAUGAGGGCU	hsa-miR-6886-5p,CC[C/U]GCAGGUGAGAUGAGGGCU	63	908	8	3.34485
1298	hsa-miR-6886-3p	chr19	+	hsa-mir-6886	No	0
1299	hsa-miR-7974	chr19	-	hsa-mir-7974	No	0
1300	hsa-miR-5684	chr19	+	hsa-mir-5684	No	0
1301	hsa-miR-6794-5p	chr19	+	hsa-mir-6794	No	4	rs375129841	12852271	G > A	8e-06	7	CAGGGGGACUGGGGGUGAGC	CAGGGGAACUGGGGGUGAGC	hsa-miR-6794-5p,CAGGGG[G/A]ACUGGGGGUGAGC	509	782	104	16.4843
1301	hsa-miR-6794-5p	chr19	+	hsa-mir-6794	No	4	rs373194996	12852268	G > A	5e-05	4	CAGGGGGACUGGGGGUGAGC	CAGAGGGACUGGGGGUGAGC	hsa-miR-6794-5p,CAG[G/A]GGGACUGGGGGUGAGC	509	685	98	16.5967
1301	hsa-miR-6794-5p	chr19	+	hsa-mir-6794	No	4	rs759958051	12852269	G > A	8e-06	5	CAGGGGGACUGGGGGUGAGC	CAGGAGGACUGGGGGUGAGC	hsa-miR-6794-5p,CAGG[G/A]GGACUGGGGGUGAGC	509	931	126	18.3036
1301	hsa-miR-6794-5p	chr19	+	hsa-mir-6794	No	4	rs769236755	12852267	G > A	1.7e-05	3	CAGGGGGACUGGGGGUGAGC	CAAGGGGACUGGGGGUGAGC	hsa-miR-6794-5p,CA[G/A]GGGGACUGGGGGUGAGC	509	605	96	17.2995
1302	hsa-miR-6794-3p	chr19	+	hsa-mir-6794	No	0
1303	hsa-miR-5695	chr19	+	hsa-mir-5695	No	0
1304	hsa-miR-6515-5p	chr19	+	hsa-mir-6515	No	0
1305	hsa-miR-6515-3p	chr19	+	hsa-mir-6515	No	4	rs75453089	12940522	C > T	0.000516	2	UCUCUUCAUCUACCCCCCAG	UUUCUUCAUCUACCCCCCAG	hsa-miR-6515-3p,U[C/U]UCUUCAUCUACCCCCCAG	941	1810	280	21.4548
1305	hsa-miR-6515-3p	chr19	+	hsa-mir-6515	No	4	rs747907310	12940527	C > T	8e-06	7	UCUCUUCAUCUACCCCCCAG	UCUCUUUAUCUACCCCCCAG	hsa-miR-6515-3p,UCUCUU[C/U]AUCUACCCCCCAG	941	1262	232	21.2894
1305	hsa-miR-6515-3p	chr19	+	hsa-mir-6515	No	4	rs373354313	12940523	T > G	8e-06	3	UCUCUUCAUCUACCCCCCAG	UCGCUUCAUCUACCCCCCAG	hsa-miR-6515-3p,UC[U/G]CUUCAUCUACCCCCCAG	941	44	5	2.45725
1305	hsa-miR-6515-3p	chr19	+	hsa-mir-6515	No	4	rs769602728	12940528	A > G	1.7e-05	8	UCUCUUCAUCUACCCCCCAG	UCUCUUCGUCUACCCCCCAG	hsa-miR-6515-3p,UCUCUUC[A/G]UCUACCCCCCAG	941	406	360	58.2431
1306	hsa-miR-24-3p	chr19	-	hsa-mir-24-2	Yes (13836288-13836651:3:hetero:hsa-mir-24-2/hsa-mir-27a/hsa-mir-23a)	0
1307	hsa-miR-24-2-5p	chr19	-	hsa-mir-24-2	Yes (13836288-13836651:3:hetero:hsa-mir-24-2/hsa-mir-27a/hsa-mir-23a)	1	rs369270610	13836345	G > T	9.7e-05	3	UGCCUACUGAGCUGAAACACAG	UGACUACUGAGCUGAAACACAG	hsa-miR-24-2-5p,UG[C/A]CUACUGAGCUGAAACACAG	191	221	18	8.76112
1308	hsa-miR-27a-5p	chr19	-	hsa-mir-27a	Yes (13836288-13836651:3:hetero:hsa-mir-24-2/hsa-mir-27a/hsa-mir-23a)	0
1309	hsa-miR-27a-3p	chr19	-	hsa-mir-27a	Yes (13836288-13836651:3:hetero:hsa-mir-24-2/hsa-mir-27a/hsa-mir-23a)	0
1310	hsa-miR-23a-5p	chr19	-	hsa-mir-23a	Yes (13836288-13836651:3:hetero:hsa-mir-24-2/hsa-mir-27a/hsa-mir-23a)	0
1311	hsa-miR-23a-3p	chr19	-	hsa-mir-23a	Yes (13836288-13836651:3:hetero:hsa-mir-24-2/hsa-mir-27a/hsa-mir-23a)	0
1312	hsa-miR-181c-5p	chr19	+	hsa-mir-181c	Yes (13874724-13874973:2:homo:hsa-mir-181c/hsa-mir-181d)	0
1313	hsa-miR-181c-3p	chr19	+	hsa-mir-181c	Yes (13874724-13874973:2:homo:hsa-mir-181c/hsa-mir-181d)	1	rs757723823	13874769	C > T	8e-06	7	AACCAUCGACCGUUGAGUGGAC	AACCAUUGACCGUUGAGUGGAC	hsa-miR-181c-3p,AACCAU[C/U]GACCGUUGAGUGGAC	121	509	22	8.86484
1314	hsa-miR-181d-5p	chr19	+	hsa-mir-181d	Yes (13874724-13874973:2:homo:hsa-mir-181c/hsa-mir-181d)	2	rs770759381	13874912	C > T	5.9e-05	3	AACAUUCAUUGUUGUCGGUGGGU	AAUAUUCAUUGUUGUCGGUGGGU	hsa-miR-181d-5p,AA[C/U]AUUCAUUGUUGUCGGUGGGU	1297	1271	324	25.2349
1314	hsa-miR-181d-5p	chr19	+	hsa-mir-181d	Yes (13874724-13874973:2:homo:hsa-mir-181c/hsa-mir-181d)	2	rs776351139	13874914	T > G	8e-06	5	AACAUUCAUUGUUGUCGGUGGGU	AACAGUCAUUGUUGUCGGUGGGU	hsa-miR-181d-5p,AACA[U/G]UCAUUGUUGUCGGUGGGU	1297	699	163	17.119
1315	hsa-miR-181d-3p	chr19	+	hsa-mir-181d	Yes (13874724-13874973:2:homo:hsa-mir-181c/hsa-mir-181d)	4	rs762192407	13874960	G > A	9e-06	8	CCACCGGGGGAUGAAUGUCAC	CCACCGGAGGAUGAAUGUCAC	hsa-miR-181d-3p,CCACCGG[G/A]GGAUGAAUGUCAC	36	25	1	3.33333
1315	hsa-miR-181d-3p	chr19	+	hsa-mir-181d	Yes (13874724-13874973:2:homo:hsa-mir-181c/hsa-mir-181d)	4	rs369928561	13874958	G > A	6.6e-05	6	CCACCGGGGGAUGAAUGUCAC	CCACCAGGGGAUGAAUGUCAC	hsa-miR-181d-3p,CCACC[G/A]GGGGAUGAAUGUCAC	36	555	2	1.41492
1315	hsa-miR-181d-3p	chr19	+	hsa-mir-181d	Yes (13874724-13874973:2:homo:hsa-mir-181c/hsa-mir-181d)	4	rs199639120	13874957	C > T	6.8e-05	5	CCACCGGGGGAUGAAUGUCAC	CCACUGGGGGAUGAAUGUCAC	hsa-miR-181d-3p,CCAC[C/U]GGGGGAUGAAUGUCAC	36	651	7	4.57253
1315	hsa-miR-181d-3p	chr19	+	hsa-mir-181d	Yes (13874724-13874973:2:homo:hsa-mir-181c/hsa-mir-181d)	4	rs763074770	13874956	C > T	9e-06	4	CCACCGGGGGAUGAAUGUCAC	CCAUCGGGGGAUGAAUGUCAC	hsa-miR-181d-3p,CCA[C/U]CGGGGGAUGAAUGUCAC	36	24	0	0
1316	hsa-miR-1199-5p	chr19	+	hsa-mir-1199	No	1	rs757334792	14073386	G > A	9.4e-05	6	CCUGAGCCCGGGCCGCGCAG	CCUGAACCCGGGCCGCGCAG	hsa-miR-1199-5p,CCUGA[G/A]CCCGGGCCGCGCAG	531	416	40	8.51072
1317	hsa-miR-1199-3p	chr19	+	hsa-mir-1199	No	0
1318	hsa-miR-639	chr19	+	hsa-mir-639	No	4	rs377544418	14529606	G > C	9.1e-05	4	AUCGCUGCGGUUGCGAGCGCUGU	AUCCCUGCGGUUGCGAGCGCUGU	hsa-miR-639,AUC[G/C]CUGCGGUUGCGAGCGCUGU	45	791	7	3.71025
1318	hsa-miR-639	chr19	+	hsa-mir-639	No	4	rs778865767	14529605	C > G	1e-05	3	AUCGCUGCGGUUGCGAGCGCUGU	AUGGCUGCGGUUGCGAGCGCUGU	hsa-miR-639,AU[C/G]GCUGCGGUUGCGAGCGCUGU	45	681	6	3.42745
1318	hsa-miR-639	chr19	+	hsa-mir-639	No	4	rs778093423	14529610	C > T	9e-06	8	AUCGCUGCGGUUGCGAGCGCUGU	AUCGCUGUGGUUGCGAGCGCUGU	hsa-miR-639,AUCGCUG[C/U]GGUUGCGAGCGCUGU	45	40	5	11.7851
1318	hsa-miR-639	chr19	+	hsa-mir-639	No	4	rs772211952	14529607	C > T	9e-06	5	AUCGCUGCGGUUGCGAGCGCUGU	AUCGUUGCGGUUGCGAGCGCUGU	hsa-miR-639,AUCG[C/U]UGCGGUUGCGAGCGCUGU	45	35	1	2.51976
1319	hsa-miR-6795-5p	chr19	-	hsa-mir-6795	No	1	rs745671800	15179344	C > T	8e-06	2	UGGGGGGACAGGAUGAGAGGCUGU	UAGGGGGACAGGAUGAGAGGCUGU	hsa-miR-6795-5p,U[G/A]GGGGGACAGGAUGAGAGGCUGU	645	509	103	17.9762
1320	hsa-miR-6795-3p	chr19	-	hsa-mir-6795	No	3	rs750789333	15179296	C > T	2.5e-05	8	ACCCCUCGUUUCUUCCCCCAG	ACCCCUCAUUUCUUCCCCCAG	hsa-miR-6795-3p,ACCCCUC[G/A]UUUCUUCCCCCAG	358	672	278	56.6785
1320	hsa-miR-6795-3p	chr19	-	hsa-mir-6795	No	3	rs564737009	15179297	G > A	0.000136	7	ACCCCUCGUUUCUUCCCCCAG	ACCCCUUGUUUCUUCCCCCAG	hsa-miR-6795-3p,ACCCCU[C/U]GUUUCUUCCCCCAG	358	421	36	9.27299
1320	hsa-miR-6795-3p	chr19	-	hsa-mir-6795	No	3	rs765016709	15179300	G > A	8e-06	4	ACCCCUCGUUUCUUCCCCCAG	ACCUCUCGUUUCUUCCCCCAG	hsa-miR-6795-3p,ACC[C/U]CUCGUUUCUUCCCCCAG	358	314	62	18.4921
1321	hsa-miR-1470	chr19	+	hsa-mir-1470	No	0
1322	hsa-miR-3188	chr19	+	hsa-mir-3188	No	0
1323	hsa-miR-3189-3p	chr19	+	hsa-mir-3189	No	0
1324	hsa-miR-3189-5p	chr19	+	hsa-mir-3189	No	2	rs756589279	18386575	C > G	2e-05	6	UGCCCCAUCUGUGCCCUGGGUAGGA	UGCCCGAUCUGUGCCCUGGGUAGGA	hsa-miR-3189-5p,UGCCC[C/G]AUCUGUGCCCUGGGUAGGA	446	16	3	3.55135
1324	hsa-miR-3189-5p	chr19	+	hsa-mir-3189	No	2	rs780163227	18386577	T > C	1e-05	8	UGCCCCAUCUGUGCCCUGGGUAGGA	UGCCCCACCUGUGCCCUGGGUAGGA	hsa-miR-3189-5p,UGCCCCA[U/C]CUGUGCCCUGGGUAGGA	446	554	230	46.2706
1325	hsa-miR-640	chr19	+	hsa-mir-640	No	1	rs765622881	19435124	T > C	8e-06	2	AUGAUCCAGGAACCUGCCUCU	ACGAUCCAGGAACCUGCCUCU	hsa-miR-640,A[U/C]GAUCCAGGAACCUGCCUCU	326	35	6	5.61705
1326	hsa-miR-1270	chr19	-	hsa-mir-1270	No	0
1327	hsa-miR-6887-5p	chr19	+	hsa-mir-6887	No	3	rs777886185	35122707	G > C	1.7e-05	3	UGGGGGGACAGAUGGAGAGGACA	UGCGGGGACAGAUGGAGAGGACA	hsa-miR-6887-5p,UG[G/C]GGGGACAGAUGGAGAGGACA	645	109	22	8.29716
1327	hsa-miR-6887-5p	chr19	+	hsa-mir-6887	No	3	rs368228340	35122712	A > G	9e-06	8	UGGGGGGACAGAUGGAGAGGACA	UGGGGGGGCAGAUGGAGAGGACA	hsa-miR-6887-5p,UGGGGGG[A/G]CAGAUGGAGAGGACA	645	525	344	59.1152
1327	hsa-miR-6887-5p	chr19	+	hsa-mir-6887	No	3	rs758570850	35122706	G > A	1.7e-05	2	UGGGGGGACAGAUGGAGAGGACA	UAGGGGGACAGAUGGAGAGGACA	hsa-miR-6887-5p,U[G/A]GGGGGACAGAUGGAGAGGACA	645	509	103	17.9762
1328	hsa-miR-6887-3p	chr19	+	hsa-mir-6887	No	0
1329	hsa-miR-5196-5p	chr19	+	hsa-mir-5196	No	0
1330	hsa-miR-5196-3p	chr19	+	hsa-mir-5196	No	1	rs758780358	35345588	C > T	2.6e-05	8	UCAUCCUCGUCUCCCUCCCAG	UCAUCCUUGUCUCCCUCCCAG	hsa-miR-5196-3p,UCAUCCU[C/U]GUCUCCCUCCCAG	565	562	209	37.0897
1331	hsa-miR-4530	chr19	-	hsa-mir-4530	No	0
1332	hsa-miR-6719-3p	chr19	-	hsa-mir-6719	No	0
1333	hsa-miR-641	chr19	-	hsa-mir-641	No	0
1334	hsa-miR-6796-5p	chr19	+	hsa-mir-6796	No	2	rs748185367	40369856	G > T	1e-05	6	UUGUGGGGUUGGAGAGCUGGCUG	UUGUGUGGUUGGAGAGCUGGCUG	hsa-miR-6796-5p,UUGUG[G/U]GGUUGGAGAGCUGGCUG	520	932	94	13.5026
1334	hsa-miR-6796-5p	chr19	+	hsa-mir-6796	No	2	rs770021429	40369858	G > T	1e-05	8	UUGUGGGGUUGGAGAGCUGGCUG	UUGUGGGUUUGGAGAGCUGGCUG	hsa-miR-6796-5p,UUGUGGG[G/U]UUGGAGAGCUGGCUG	520	429	189	40.0158
1335	hsa-miR-6796-3p	chr19	+	hsa-mir-6796	No	3	rs750114668	40369892	T > C	2.7e-05	6	GAAGCUCUCCCCUCCCCGCAG	GAAGCCCUCCCCUCCCCGCAG	hsa-miR-6796-3p,GAAGC[U/C]CUCCCCUCCCCGCAG	410	379	28	7.10308
1335	hsa-miR-6796-3p	chr19	+	hsa-mir-6796	No	3	rs776167033	40369890	G > T	2.7e-05	4	GAAGCUCUCCCCUCCCCGCAG	GAAUCUCUCCCCUCCCCGCAG	hsa-miR-6796-3p,GAA[G/U]CUCUCCCCUCCCCGCAG	410	630	61	12.0024
1335	hsa-miR-6796-3p	chr19	+	hsa-mir-6796	No	3	rs3745198	40369893	C > G	0.499646	7	GAAGCUCUCCCCUCCCCGCAG	GAAGCUGUCCCCUCCCCGCAG	hsa-miR-6796-3p,GAAGCU[C/G]UCCCCUCCCCGCAG	410	597	60	12.1275
1336	hsa-miR-6797-5p	chr19	+	hsa-mir-6797	No	0
1337	hsa-miR-6797-3p	chr19	+	hsa-mir-6797	No	1	rs782356785	41869682	C > T	5.8e-05	8	UGCAUGACCCUUCCCUCCCCAC	UGCAUGAUCCUUCCCUCCCCAC	hsa-miR-6797-3p,UGCAUGA[C/U]CCUUCCCUCCCCAC	333	381	135	37.9009
1338	hsa-miR-4323	chr19	-	hsa-mir-4323	No	0
1339	hsa-miR-8077	chr19	+	hsa-mir-8077	No	1	rs769985720	42351179	A > C	1e-05	6	GGCUGAGUGGGGUUCUGACUCC	GGCUGCGUGGGGUUCUGACUCC	hsa-miR-8077,GGCUG[A/C]GUGGGGUUCUGACUCC	597	33	2	1.4249
1340	hsa-miR-4531	chr19	-	hsa-mir-4531	No	0
1341	hsa-miR-8085	chr19	+	hsa-mir-8085	No	2	rs768189924	44758674	G > A	8e-06	8	UGGGAGAGAGGACUGUGAGGC	UGGGAGAAAGGACUGUGAGGC	hsa-miR-8085,UGGGAGA[G/A]AGGACUGUGAGGC	948	1047	470	47.1759
1341	hsa-miR-8085	chr19	+	hsa-mir-8085	No	2	rs746875246	44758668	G > A	4.5e-05	2	UGGGAGAGAGGACUGUGAGGC	UAGGAGAGAGGACUGUGAGGC	hsa-miR-8085,U[G/A]GGAGAGAGGACUGUGAGGC	948	821	170	19.2696
1342	hsa-miR-6088	chr19	+	hsa-mir-6088	No	0
1343	hsa-miR-330-5p	chr19	-	hsa-mir-330	No	1	rs768769902	45639068	A > G	2.5e-05	3	UCUCUGGGCCUGUGUCUUAGGC	UCCCUGGGCCUGUGUCUUAGGC	hsa-miR-330-5p,UC[U/C]CUGGGCCUGUGUCUUAGGC	819	920	176	20.2757
1344	hsa-miR-330-3p	chr19	-	hsa-mir-330	No	0
1345	hsa-miR-642a-5p	chr19	+	hsa-mir-642a	No	2	rs78902025	45674948	T > G	1.6e-05	6	GUCCCUCUCCAAAUGUGUCUUG	GUCCCGCUCCAAAUGUGUCUUG	hsa-miR-642a-5p,GUCCC[U/G]CUCCAAAUGUGUCUUG	759	40	12	6.887
1345	hsa-miR-642a-5p	chr19	+	hsa-mir-642a	No	2	rs374751972	45674950	T > A	1.7e-05	8	GUCCCUCUCCAAAUGUGUCUUG	GUCCCUCACCAAAUGUGUCUUG	hsa-miR-642a-5p,GUCCCUC[U/A]CCAAAUGUGUCUUG	759	644	313	44.7693
1346	hsa-miR-642a-3p	chr19	+	hsa-mir-642a	No	1	rs200255173	45674980	A > G	2.6e-05	3	AGACACAUUUGGAGAGGGAACC	AGGCACAUUUGGAGAGGGAACC	hsa-miR-642a-3p,AG[A/G]CACAUUUGGAGAGGGAACC	685	666	91	13.4728
1347	hsa-miR-642b-3p	chr19	-	hsa-mir-642b	No	1	rs111664333	45674959	G > A	0.5	4	AGACACAUUUGGAGAGGGACCC	AGAUACAUUUGGAGAGGGACCC	hsa-miR-642b-3p,AGA[C/U]ACAUUUGGAGAGGGACCC	685	681	88	12.8844
1348	hsa-miR-642b-5p	chr19	-	hsa-mir-642b	No	3	rs766120138	45674992	A > C	2.8e-05	8	GGUUCCCUCUCCAAAUGUGUCU	GGUUCCCGCUCCAAAUGUGUCU	hsa-miR-642b-5p,GGUUCCC[U/G]CUCCAAAUGUGUCU	389	142	94	39.9953
1348	hsa-miR-642b-5p	chr19	-	hsa-mir-642b	No	3	rs759236044	45674998	C > T	1.9e-05	2	GGUUCCCUCUCCAAAUGUGUCU	GAUUCCCUCUCCAAAUGUGUCU	hsa-miR-642b-5p,G[G/A]UUCCCUCUCCAAAUGUGUCU	389	521	47	10.4401
1348	hsa-miR-642b-5p	chr19	-	hsa-mir-642b	No	3	rs377713506	45674997	A > C	0.000975	3	GGUUCCCUCUCCAAAUGUGUCU	GGGUCCCUCUCCAAAUGUGUCU	hsa-miR-642b-5p,GG[U/G]UCCCUCUCCAAAUGUGUCU	389	319	19	5.39366
1349	hsa-miR-769-5p	chr19	+	hsa-mir-769	No	0
1350	hsa-miR-769-3p	chr19	+	hsa-mir-769	No	0
1351	hsa-miR-320e	chr19	-	hsa-mir-320e	No	0
1352	hsa-miR-3190-5p	chr19	+	hsa-mir-3190	No	0
1353	hsa-miR-3190-3p	chr19	+	hsa-mir-3190	No	0
1354	hsa-miR-3191-3p	chr19	-	hsa-mir-3191	No	0
1355	hsa-miR-3191-5p	chr19	-	hsa-mir-3191	No	0
1356	hsa-miR-6798-5p	chr19	+	hsa-mir-6798	No	1	rs543779690	49009916	G > A	0.0002	6	CCAGGGGGAUGGGCGAGCUUGGG	CCAGGAGGAUGGGCGAGCUUGGG	hsa-miR-6798-5p,CCAGG[G/A]GGAUGGGCGAGCUUGGG	550	1020	134	17.8905
1357	hsa-miR-6798-3p	chr19	+	hsa-mir-6798	No	0
1358	hsa-miR-4324	chr19	-	hsa-mir-4324	No	1	rs759457721	49308825	G > A	9e-06	2	CCCUGAGACCCUAACCUUAA	CUCUGAGACCCUAACCUUAA	hsa-miR-4324,C[C/U]CUGAGACCCUAACCUUAA	727	904	125	15.4191
1359	hsa-miR-150-5p	chr19	-	hsa-mir-150	No	0
1360	hsa-miR-150-3p	chr19	-	hsa-mir-150	No	0
1361	hsa-miR-5088-5p	chr19	+	hsa-mir-5088	No	1	rs762867250	49682124	G > A	8e-06	3	CAGGGCUCAGGGAUUGGAUGGAGG	CAAGGCUCAGGGAUUGGAUGGAGG	hsa-miR-5088-5p,CA[G/A]GGCUCAGGGAUUGGAUGGAGG	398	555	46	9.78746
1362	hsa-miR-5088-3p	chr19	+	hsa-mir-5088	No	0
1363	hsa-miR-6799-5p	chr19	+	hsa-mir-6799	No	1	rs767550469	49791876	G > T	0.000164	6	GGGGAGGUGUGCAGGGCUGG	GGGGAUGUGUGCAGGGCUGG	hsa-miR-6799-5p,GGGGA[G/U]GUGUGCAGGGCUGG	1118	389	87	13.1924
1364	hsa-miR-6799-3p	chr19	+	hsa-mir-6799	No	1	rs780082296	49791913	G > T	2.3e-05	2	UGCCCUGCAUGGUGUCCCCACAG	UUCCCUGCAUGGUGUCCCCACAG	hsa-miR-6799-3p,U[G/U]CCCUGCAUGGUGUCCCCACAG	626	791	123	17.4795
1365	hsa-miR-6800-5p	chr19	+	hsa-mir-6800	No	2	rs749843673	49832029	A > G	1.7e-05	8	GUAGGUGACAGUCAGGGGCGG	GUAGGUGGCAGUCAGGGGCGG	hsa-miR-6800-5p,GUAGGUG[A/G]CAGUCAGGGGCGG	269	233	74	29.5582
1365	hsa-miR-6800-5p	chr19	+	hsa-mir-6800	No	2	rs778380162	49832026	G > C	8e-06	5	GUAGGUGACAGUCAGGGGCGG	GUAGCUGACAGUCAGGGGCGG	hsa-miR-6800-5p,GUAG[G/C]UGACAGUCAGGGGCGG	269	429	14	4.1212
1366	hsa-miR-6800-3p	chr19	+	hsa-mir-6800	No	1	rs570852452	49832078	C > A	1.6e-05	3	CACCUCUCCUGGCAUCGCCCC	CAACUCUCCUGGCAUCGCCCC	hsa-miR-6800-3p,CA[C/A]CUCUCCUGGCAUCGCCCC	361	524	47	10.8063
1367	hsa-miR-4749-5p	chr19	+	hsa-mir-4749	No	4	rs552910419	49854596	G > A	0.000348	4	UGCGGGGACAGGCCAGGGCAUC	UGCAGGGACAGGCCAGGGCAUC	hsa-miR-4749-5p,UGC[G/A]GGGACAGGCCAGGGCAUC	109	886	31	9.97543
1367	hsa-miR-4749-5p	chr19	+	hsa-mir-4749	No	4	rs766523467	49854599	G > T	8e-06	7	UGCGGGGACAGGCCAGGGCAUC	UGCGGGUACAGGCCAGGGCAUC	hsa-miR-4749-5p,UGCGGG[G/U]ACAGGCCAGGGCAUC	109	16	1	2.39457
1367	hsa-miR-4749-5p	chr19	+	hsa-mir-4749	No	4	rs370929811	49854595	C > T	1.6e-05	3	UGCGGGGACAGGCCAGGGCAUC	UGUGGGGACAGGCCAGGGCAUC	hsa-miR-4749-5p,UG[C/U]GGGGACAGGCCAGGGCAUC	109	756	26	9.05731
1367	hsa-miR-4749-5p	chr19	+	hsa-mir-4749	No	4	rs770355657	49854594	G > A	8e-06	2	UGCGGGGACAGGCCAGGGCAUC	UACGGGGACAGGCCAGGGCAUC	hsa-miR-4749-5p,U[G/A]CGGGGACAGGCCAGGGCAUC	109	53	3	3.94703
1368	hsa-miR-4749-3p	chr19	+	hsa-mir-4749	No	4	rs200056596	49854635	C > T	0.0001	4	CGCCCCUCCUGCCCCCACAG	CGCUCCUCCUGCCCCCACAG	hsa-miR-4749-3p,CGC[C/U]CCUCCUGCCCCCACAG	519	512	70	13.5794
1368	hsa-miR-4749-3p	chr19	+	hsa-mir-4749	No	4	rs148982635	49854633	G > A	0.000257	2	CGCCCCUCCUGCCCCCACAG	CACCCCUCCUGCCCCCACAG	hsa-miR-4749-3p,C[G/A]CCCCUCCUGCCCCCACAG	519	242	31	8.74723
1368	hsa-miR-4749-3p	chr19	+	hsa-mir-4749	No	4	rs372882504	49854634	C > T	4.2e-05	3	CGCCCCUCCUGCCCCCACAG	CGUCCCUCCUGCCCCCACAG	hsa-miR-4749-3p,CG[C/U]CCCUCCUGCCCCCACAG	519	383	45	10.0932
1368	hsa-miR-4749-3p	chr19	+	hsa-mir-4749	No	4	rs570340094	49854636	C > T	4.8e-05	5	CGCCCCUCCUGCCCCCACAG	CGCCUCUCCUGCCCCCACAG	hsa-miR-4749-3p,CGCC[C/U]CUCCUGCCCCCACAG	519	545	59	11.0935
1369	hsa-miR-4750-5p	chr19	+	hsa-mir-4750	No	1	rs754420414	49888183	C > G	9e-06	7	CUCGGGCGGAGGUGGUUGAGUG	CUCGGGGGGAGGUGGUUGAGUG	hsa-miR-4750-5p,CUCGGG[C/G]GGAGGUGGUUGAGUG	11	64	1	3.76889
1370	hsa-miR-4750-3p	chr19	+	hsa-mir-4750	No	2	rs750574552	49888214	C > T	8e-06	6	CCUGACCCACCCCCUCCCGCAG	CCUGAUCCACCCCCUCCCGCAG	hsa-miR-4750-3p,CCUGA[C/U]CCACCCCCUCCCGCAG	387	359	26	6.97542
1370	hsa-miR-4750-3p	chr19	+	hsa-mir-4750	No	2	rs528431362	49888215	C > T	0.000661	7	CCUGACCCACCCCCUCCCGCAG	CCUGACUCACCCCCUCCCGCAG	hsa-miR-4750-3p,CCUGAC[C/U]CACCCCCUCCCGCAG	387	405	27	6.81994
1371	hsa-miR-4751	chr19	+	hsa-mir-4751	No	0
1372	hsa-miR-8074	chr19	-	hsa-mir-8074	No	2	rs116137837	51206956	G > A	0.013179	7	CUAUGGCGAGACUGGCAUGUACUC	CUAUGGUGAGACUGGCAUGUACUC	hsa-miR-8074,CUAUGG[C/U]GAGACUGGCAUGUACUC	97	303	8	4.66641
1372	hsa-miR-8074	chr19	-	hsa-mir-8074	No	2	rs547079277	51206960	T > C	0.000599	3	CUAUGGCGAGACUGGCAUGUACUC	CUGUGGCGAGACUGGCAUGUACUC	hsa-miR-8074,CU[A/G]UGGCGAGACUGGCAUGUACUC	97	136	2	1.7413
1373	hsa-miR-99b-5p	chr19	+	hsa-mir-99b	Yes (51692617-51693327:3:hetero:hsa-mir-99b/hsa-let-7e/hsa-mir-125a)	3	rs757194245	51692619	A > C	9e-06	2	CACCCGUAGAACCGACCUUGCG	CCCCCGUAGAACCGACCUUGCG	hsa-miR-99b-5p,C[A/C]CCCGUAGAACCGACCUUGCG	31	36	0	0
1373	hsa-miR-99b-5p	chr19	+	hsa-mir-99b	Yes (51692617-51693327:3:hetero:hsa-mir-99b/hsa-let-7e/hsa-mir-125a)	3	rs745644045	51692623	G > A	9e-06	6	CACCCGUAGAACCGACCUUGCG	CACCCAUAGAACCGACCUUGCG	hsa-miR-99b-5p,CACCC[G/A]UAGAACCGACCUUGCG	31	303	3	3.09542
1373	hsa-miR-99b-5p	chr19	+	hsa-mir-99b	Yes (51692617-51693327:3:hetero:hsa-mir-99b/hsa-let-7e/hsa-mir-125a)	3	rs779007561	51692622	C > T	9e-06	5	CACCCGUAGAACCGACCUUGCG	CACCUGUAGAACCGACCUUGCG	hsa-miR-99b-5p,CACC[C/U]GUAGAACCGACCUUGCG	31	415	1	0.881648
1374	hsa-miR-99b-3p	chr19	+	hsa-mir-99b	Yes (51692617-51693327:3:hetero:hsa-mir-99b/hsa-let-7e/hsa-mir-125a)	1	rs370401647	51692660	C > T	9e-06	5	CAAGCUCGUGUCUGUGGGUCCG	CAAGUUCGUGUCUGUGGGUCCG	hsa-miR-99b-3p,CAAG[C/U]UCGUGUCUGUGGGUCCG	131	222	8	4.69113
1375	hsa-let-7e-5p	chr19	+	hsa-let-7e	Yes (51692617-51693327:3:hetero:hsa-mir-99b/hsa-let-7e/hsa-mir-125a)	0
1376	hsa-let-7e-3p	chr19	+	hsa-let-7e	Yes (51692617-51693327:3:hetero:hsa-mir-99b/hsa-let-7e/hsa-mir-125a)	1	rs752517215	51692844	G > A	1.7e-05	7	CUAUACGGCCUCCUAGCUUUCC	CUAUACAGCCUCCUAGCUUUCC	hsa-let-7e-3p,CUAUAC[G/A]GCCUCCUAGCUUUCC	41	1451	7	2.86994
1377	hsa-miR-125a-5p	chr19	+	hsa-mir-125a	Yes (51692617-51693327:3:hetero:hsa-mir-99b/hsa-let-7e/hsa-mir-125a)	0
1378	hsa-miR-125a-3p	chr19	+	hsa-mir-125a	Yes (51692617-51693327:3:hetero:hsa-mir-99b/hsa-let-7e/hsa-mir-125a)	0
1379	hsa-miR-6801-5p	chr19	+	hsa-mir-6801	No	0
1380	hsa-miR-6801-3p	chr19	+	hsa-mir-6801	No	0
1381	hsa-miR-643	chr19	+	hsa-mir-643	No	1	rs772589607	52281861	G > T	1.8e-05	5	ACUUGUAUGCUAGCUCAGGUAG	ACUUUUAUGCUAGCUCAGGUAG	hsa-miR-643,ACUU[G/U]UAUGCUAGCUCAGGUAG	498	2013	177	17.6781
1382	hsa-miR-512-5p	chr19	+	hsa-mir-512-1	Yes (53666691-53762418:46:HHC:hsa-mir-512-1/hsa-mir-512-2/hsa-mir-1323/hsa-mir-498/hsa-mir-520e/hsa-mir-515-1/hsa-mir-519e/hsa-mir-520f/hsa-mir-515-2/hsa-mir-519c/hsa-mir-1283-1/hsa-mir-520a/hsa-mir-526b/hsa-mir-519b/hsa-mir-525/hsa-mir-523/hsa-mir-518f/hsa-mir-520b/hsa-mir-518b/hsa-mir-526a-1/hsa-mir-520c/hsa-mir-518c/hsa-mir-524/hsa-mir-517a/hsa-mir-519d/hsa-mir-521-2/hsa-mir-520d/hsa-mir-517b/…	0
1383	hsa-miR-512-3p	chr19	+	hsa-mir-512-1	Yes (53666691-53762418:46:HHC:hsa-mir-512-1/hsa-mir-512-2/hsa-mir-1323/hsa-mir-498/hsa-mir-520e/hsa-mir-515-1/hsa-mir-519e/hsa-mir-520f/hsa-mir-515-2/hsa-mir-519c/hsa-mir-1283-1/hsa-mir-520a/hsa-mir-526b/hsa-mir-519b/hsa-mir-525/hsa-mir-523/hsa-mir-518f/hsa-mir-520b/hsa-mir-518b/hsa-mir-526a-1/hsa-mir-520c/hsa-mir-518c/hsa-mir-524/hsa-mir-517a/hsa-mir-519d/hsa-mir-521-2/hsa-mir-520d/hsa-mir-517b/…	3	rs781608931	53666733	G > T	8e-06	5	AAGUGCUGUCAUAGCUGAGGUC	AAGUUCUGUCAUAGCUGAGGUC	hsa-miR-512-3p,AAGU[G/U]CUGUCAUAGCUGAGGUC	436	707	72	12.9682
1383	hsa-miR-512-3p	chr19	+	hsa-mir-512-1	Yes (53666691-53762418:46:HHC:hsa-mir-512-1/hsa-mir-512-2/hsa-mir-1323/hsa-mir-498/hsa-mir-520e/hsa-mir-515-1/hsa-mir-519e/hsa-mir-520f/hsa-mir-515-2/hsa-mir-519c/hsa-mir-1283-1/hsa-mir-520a/hsa-mir-526b/hsa-mir-519b/hsa-mir-525/hsa-mir-523/hsa-mir-518f/hsa-mir-520b/hsa-mir-518b/hsa-mir-526a-1/hsa-mir-520c/hsa-mir-518c/hsa-mir-524/hsa-mir-517a/hsa-mir-519d/hsa-mir-521-2/hsa-mir-520d/hsa-mir-517b/…	3	rs746404558	53666736	G > A	8e-06	8	AAGUGCUGUCAUAGCUGAGGUC	AAGUGCUAUCAUAGCUGAGGUC	hsa-miR-512-3p,AAGUGCU[G/A]UCAUAGCUGAGGUC	436	460	176	39.2998
1383	hsa-miR-512-3p	chr19	+	hsa-mir-512-1	Yes (53666691-53762418:46:HHC:hsa-mir-512-1/hsa-mir-512-2/hsa-mir-1323/hsa-mir-498/hsa-mir-520e/hsa-mir-515-1/hsa-mir-519e/hsa-mir-520f/hsa-mir-515-2/hsa-mir-519c/hsa-mir-1283-1/hsa-mir-520a/hsa-mir-526b/hsa-mir-519b/hsa-mir-525/hsa-mir-523/hsa-mir-518f/hsa-mir-520b/hsa-mir-518b/hsa-mir-526a-1/hsa-mir-520c/hsa-mir-518c/hsa-mir-524/hsa-mir-517a/hsa-mir-519d/hsa-mir-521-2/hsa-mir-520d/hsa-mir-517b/…	3	rs757627265	53666731	G > A	8e-06	3	AAGUGCUGUCAUAGCUGAGGUC	AAAUGCUGUCAUAGCUGAGGUC	hsa-miR-512-3p,AA[G/A]UGCUGUCAUAGCUGAGGUC	436	856	80	13.0951
1384	hsa-miR-512-5p	chr19	+	hsa-mir-512-2	Yes (53666691-53762418:46:HHC:hsa-mir-512-1/hsa-mir-512-2/hsa-mir-1323/hsa-mir-498/hsa-mir-520e/hsa-mir-515-1/hsa-mir-519e/hsa-mir-520f/hsa-mir-515-2/hsa-mir-519c/hsa-mir-1283-1/hsa-mir-520a/hsa-mir-526b/hsa-mir-519b/hsa-mir-525/hsa-mir-523/hsa-mir-518f/hsa-mir-520b/hsa-mir-518b/hsa-mir-526a-1/hsa-mir-520c/hsa-mir-518c/hsa-mir-524/hsa-mir-517a/hsa-mir-519d/hsa-mir-521-2/hsa-mir-520d/hsa-mir-517b/…	2	rs761945604	53669183	C > T	1e-05	8	CACUCAGCCUUGAGGGCACUUUC	CACUCAGUCUUGAGGGCACUUUC	hsa-miR-512-5p,CACUCAG[C/U]CUUGAGGGCACUUUC	453	441	176	39.3771
1384	hsa-miR-512-5p	chr19	+	hsa-mir-512-2	Yes (53666691-53762418:46:HHC:hsa-mir-512-1/hsa-mir-512-2/hsa-mir-1323/hsa-mir-498/hsa-mir-520e/hsa-mir-515-1/hsa-mir-519e/hsa-mir-520f/hsa-mir-515-2/hsa-mir-519c/hsa-mir-1283-1/hsa-mir-520a/hsa-mir-526b/hsa-mir-519b/hsa-mir-525/hsa-mir-523/hsa-mir-518f/hsa-mir-520b/hsa-mir-518b/hsa-mir-526a-1/hsa-mir-520c/hsa-mir-518c/hsa-mir-524/hsa-mir-517a/hsa-mir-519d/hsa-mir-521-2/hsa-mir-520d/hsa-mir-517b/…	2	rs774382474	53669180	C > T	1e-05	5	CACUCAGCCUUGAGGGCACUUUC	CACUUAGCCUUGAGGGCACUUUC	hsa-miR-512-5p,CACU[C/U]AGCCUUGAGGGCACUUUC	453	344	32	8.10628
1385	hsa-miR-512-3p	chr19	+	hsa-mir-512-2	Yes (53666691-53762418:46:HHC:hsa-mir-512-1/hsa-mir-512-2/hsa-mir-1323/hsa-mir-498/hsa-mir-520e/hsa-mir-515-1/hsa-mir-519e/hsa-mir-520f/hsa-mir-515-2/hsa-mir-519c/hsa-mir-1283-1/hsa-mir-520a/hsa-mir-526b/hsa-mir-519b/hsa-mir-525/hsa-mir-523/hsa-mir-518f/hsa-mir-520b/hsa-mir-518b/hsa-mir-526a-1/hsa-mir-520c/hsa-mir-518c/hsa-mir-524/hsa-mir-517a/hsa-mir-519d/hsa-mir-521-2/hsa-mir-520d/hsa-mir-517b/…	1	rs754282354	53669220	G > A	9e-06	8	AAGUGCUGUCAUAGCUGAGGUC	AAGUGCUAUCAUAGCUGAGGUC	hsa-miR-512-3p,AAGUGCU[G/A]UCAUAGCUGAGGUC	436	460	176	39.2998
1386	hsa-miR-1323	chr19	+	hsa-mir-1323	Yes (53666691-53762418:46:HHC:hsa-mir-512-1/hsa-mir-512-2/hsa-mir-1323/hsa-mir-498/hsa-mir-520e/hsa-mir-515-1/hsa-mir-519e/hsa-mir-520f/hsa-mir-515-2/hsa-mir-519c/hsa-mir-1283-1/hsa-mir-520a/hsa-mir-526b/hsa-mir-519b/hsa-mir-525/hsa-mir-523/hsa-mir-518f/hsa-mir-520b/hsa-mir-518b/hsa-mir-526a-1/hsa-mir-520c/hsa-mir-518c/hsa-mir-524/hsa-mir-517a/hsa-mir-519d/hsa-mir-521-2/hsa-mir-520d/hsa-mir-517b/…	0
1387	hsa-miR-498	chr19	+	hsa-mir-498	Yes (53666691-53762418:46:HHC:hsa-mir-512-1/hsa-mir-512-2/hsa-mir-1323/hsa-mir-498/hsa-mir-520e/hsa-mir-515-1/hsa-mir-519e/hsa-mir-520f/hsa-mir-515-2/hsa-mir-519c/hsa-mir-1283-1/hsa-mir-520a/hsa-mir-526b/hsa-mir-519b/hsa-mir-525/hsa-mir-523/hsa-mir-518f/hsa-mir-520b/hsa-mir-518b/hsa-mir-526a-1/hsa-mir-520c/hsa-mir-518c/hsa-mir-524/hsa-mir-517a/hsa-mir-519d/hsa-mir-521-2/hsa-mir-520d/hsa-mir-517b/…	0
1388	hsa-miR-520e	chr19	+	hsa-mir-520e	Yes (53666691-53762418:46:HHC:hsa-mir-512-1/hsa-mir-512-2/hsa-mir-1323/hsa-mir-498/hsa-mir-520e/hsa-mir-515-1/hsa-mir-519e/hsa-mir-520f/hsa-mir-515-2/hsa-mir-519c/hsa-mir-1283-1/hsa-mir-520a/hsa-mir-526b/hsa-mir-519b/hsa-mir-525/hsa-mir-523/hsa-mir-518f/hsa-mir-520b/hsa-mir-518b/hsa-mir-526a-1/hsa-mir-520c/hsa-mir-518c/hsa-mir-524/hsa-mir-517a/hsa-mir-519d/hsa-mir-521-2/hsa-mir-520d/hsa-mir-517b/…	2	rs554870816	53675770	C > T	0.0002	7	AAAGUGCUUCCUUUUUGAGGG	AAAGUGUUUCCUUUUUGAGGG	hsa-miR-520e,AAAGUG[C/U]UUCCUUUUUGAGGG	690	797	116	15.6424
1388	hsa-miR-520e	chr19	+	hsa-mir-520e	Yes (53666691-53762418:46:HHC:hsa-mir-512-1/hsa-mir-512-2/hsa-mir-1323/hsa-mir-498/hsa-mir-520e/hsa-mir-515-1/hsa-mir-519e/hsa-mir-520f/hsa-mir-515-2/hsa-mir-519c/hsa-mir-1283-1/hsa-mir-520a/hsa-mir-526b/hsa-mir-519b/hsa-mir-525/hsa-mir-523/hsa-mir-518f/hsa-mir-520b/hsa-mir-518b/hsa-mir-526a-1/hsa-mir-520c/hsa-mir-518c/hsa-mir-524/hsa-mir-517a/hsa-mir-519d/hsa-mir-521-2/hsa-mir-520d/hsa-mir-517b/…	2	rs778588089	53675767	G > A	8e-06	4	AAAGUGCUUCCUUUUUGAGGG	AAAAUGCUUCCUUUUUGAGGG	hsa-miR-520e,AAA[G/A]UGCUUCCUUUUUGAGGG	690	1435	210	21.1042
1389	hsa-miR-515-5p	chr19	+	hsa-mir-515-1	Yes (53666691-53762418:46:HHC:hsa-mir-512-1/hsa-mir-512-2/hsa-mir-1323/hsa-mir-498/hsa-mir-520e/hsa-mir-515-1/hsa-mir-519e/hsa-mir-520f/hsa-mir-515-2/hsa-mir-519c/hsa-mir-1283-1/hsa-mir-520a/hsa-mir-526b/hsa-mir-519b/hsa-mir-525/hsa-mir-523/hsa-mir-518f/hsa-mir-520b/hsa-mir-518b/hsa-mir-526a-1/hsa-mir-520c/hsa-mir-518c/hsa-mir-524/hsa-mir-517a/hsa-mir-519d/hsa-mir-521-2/hsa-mir-520d/hsa-mir-517b/…	0
1390	hsa-miR-515-3p	chr19	+	hsa-mir-515-1	Yes (53666691-53762418:46:HHC:hsa-mir-512-1/hsa-mir-512-2/hsa-mir-1323/hsa-mir-498/hsa-mir-520e/hsa-mir-515-1/hsa-mir-519e/hsa-mir-520f/hsa-mir-515-2/hsa-mir-519c/hsa-mir-1283-1/hsa-mir-520a/hsa-mir-526b/hsa-mir-519b/hsa-mir-525/hsa-mir-523/hsa-mir-518f/hsa-mir-520b/hsa-mir-518b/hsa-mir-526a-1/hsa-mir-520c/hsa-mir-518c/hsa-mir-524/hsa-mir-517a/hsa-mir-519d/hsa-mir-521-2/hsa-mir-520d/hsa-mir-517b/…	1	rs766968258	53679058	C > G	2.5e-05	6	GAGUGCCUUCUUUUGGAGCGUU	GAGUGGCUUCUUUUGGAGCGUU	hsa-miR-515-3p,GAGUG[C/G]CUUCUUUUGGAGCGUU	280	347	21	6.73714
1391	hsa-miR-519e-5p	chr19	+	hsa-mir-519e	Yes (53666691-53762418:46:HHC:hsa-mir-512-1/hsa-mir-512-2/hsa-mir-1323/hsa-mir-498/hsa-mir-520e/hsa-mir-515-1/hsa-mir-519e/hsa-mir-520f/hsa-mir-515-2/hsa-mir-519c/hsa-mir-1283-1/hsa-mir-520a/hsa-mir-526b/hsa-mir-519b/hsa-mir-525/hsa-mir-523/hsa-mir-518f/hsa-mir-520b/hsa-mir-518b/hsa-mir-526a-1/hsa-mir-520c/hsa-mir-518c/hsa-mir-524/hsa-mir-517a/hsa-mir-519d/hsa-mir-521-2/hsa-mir-520d/hsa-mir-517b/…	2	rs750119870	53679957	C > G	8e-06	5	UUCUCCAAAAGGGAGCACUUUC	UUCUGCAAAAGGGAGCACUUUC	hsa-miR-519e-5p,UUCU[C/G]CAAAAGGGAGCACUUUC	1036	1012	190	18.556
1391	hsa-miR-519e-5p	chr19	+	hsa-mir-519e	Yes (53666691-53762418:46:HHC:hsa-mir-512-1/hsa-mir-512-2/hsa-mir-1323/hsa-mir-498/hsa-mir-520e/hsa-mir-515-1/hsa-mir-519e/hsa-mir-520f/hsa-mir-515-2/hsa-mir-519c/hsa-mir-1283-1/hsa-mir-520a/hsa-mir-526b/hsa-mir-519b/hsa-mir-525/hsa-mir-523/hsa-mir-518f/hsa-mir-520b/hsa-mir-518b/hsa-mir-526a-1/hsa-mir-520c/hsa-mir-518c/hsa-mir-524/hsa-mir-517a/hsa-mir-519d/hsa-mir-521-2/hsa-mir-520d/hsa-mir-517b/…	2	rs767007678	53679954	T > C	8e-06	2	UUCUCCAAAAGGGAGCACUUUC	UCCUCCAAAAGGGAGCACUUUC	hsa-miR-519e-5p,U[U/C]CUCCAAAAGGGAGCACUUUC	1036	718	142	16.4644
1392	hsa-miR-519e-3p	chr19	+	hsa-mir-519e	Yes (53666691-53762418:46:HHC:hsa-mir-512-1/hsa-mir-512-2/hsa-mir-1323/hsa-mir-498/hsa-mir-520e/hsa-mir-515-1/hsa-mir-519e/hsa-mir-520f/hsa-mir-515-2/hsa-mir-519c/hsa-mir-1283-1/hsa-mir-520a/hsa-mir-526b/hsa-mir-519b/hsa-mir-525/hsa-mir-523/hsa-mir-518f/hsa-mir-520b/hsa-mir-518b/hsa-mir-526a-1/hsa-mir-520c/hsa-mir-518c/hsa-mir-524/hsa-mir-517a/hsa-mir-519d/hsa-mir-521-2/hsa-mir-520d/hsa-mir-517b/…	1	rs778834695	53679997	C > T	1.7e-05	7	AAGUGCCUCCUUUUAGAGUGUU	AAGUGCUUCCUUUUAGAGUGUU	hsa-miR-519e-3p,AAGUGC[C/U]UCCUUUUAGAGUGUU	280	607	36	8.73231
1393	hsa-miR-520f-3p	chr19	+	hsa-mir-520f	Yes (53666691-53762418:46:HHC:hsa-mir-512-1/hsa-mir-512-2/hsa-mir-1323/hsa-mir-498/hsa-mir-520e/hsa-mir-515-1/hsa-mir-519e/hsa-mir-520f/hsa-mir-515-2/hsa-mir-519c/hsa-mir-1283-1/hsa-mir-520a/hsa-mir-526b/hsa-mir-519b/hsa-mir-525/hsa-mir-523/hsa-mir-518f/hsa-mir-520b/hsa-mir-518b/hsa-mir-526a-1/hsa-mir-520c/hsa-mir-518c/hsa-mir-524/hsa-mir-517a/hsa-mir-519d/hsa-mir-521-2/hsa-mir-520d/hsa-mir-517b/…	1	rs750699853	53682215	G > A	8e-06	3	AAGUGCUUCCUUUUAGAGGGUU	AAAUGCUUCCUUUUAGAGGGUU	hsa-miR-520f-3p,AA[G/A]UGCUUCCUUUUAGAGGGUU	607	1103	154	18.8208
1394	hsa-miR-520f-5p	chr19	+	hsa-mir-520f	Yes (53666691-53762418:46:HHC:hsa-mir-512-1/hsa-mir-512-2/hsa-mir-1323/hsa-mir-498/hsa-mir-520e/hsa-mir-515-1/hsa-mir-519e/hsa-mir-520f/hsa-mir-515-2/hsa-mir-519c/hsa-mir-1283-1/hsa-mir-520a/hsa-mir-526b/hsa-mir-519b/hsa-mir-525/hsa-mir-523/hsa-mir-518f/hsa-mir-520b/hsa-mir-518b/hsa-mir-526a-1/hsa-mir-520c/hsa-mir-518c/hsa-mir-524/hsa-mir-517a/hsa-mir-519d/hsa-mir-521-2/hsa-mir-520d/hsa-mir-517b/…	2	rs776296229	53682176	C > T	8e-06	4	CCUCUAAAGGGAAGCGCUUUCU	CCUUUAAAGGGAAGCGCUUUCU	hsa-miR-520f-5p,CCU[C/U]UAAAGGGAAGCGCUUUCU	901	2401	370	25.1561
1394	hsa-miR-520f-5p	chr19	+	hsa-mir-520f	Yes (53666691-53762418:46:HHC:hsa-mir-512-1/hsa-mir-512-2/hsa-mir-1323/hsa-mir-498/hsa-mir-520e/hsa-mir-515-1/hsa-mir-519e/hsa-mir-520f/hsa-mir-515-2/hsa-mir-519c/hsa-mir-1283-1/hsa-mir-520a/hsa-mir-526b/hsa-mir-519b/hsa-mir-525/hsa-mir-523/hsa-mir-518f/hsa-mir-520b/hsa-mir-518b/hsa-mir-526a-1/hsa-mir-520c/hsa-mir-518c/hsa-mir-524/hsa-mir-517a/hsa-mir-519d/hsa-mir-521-2/hsa-mir-520d/hsa-mir-517b/…	2	rs747233279	53682175	T > C	1.7e-05	3	CCUCUAAAGGGAAGCGCUUUCU	CCCCUAAAGGGAAGCGCUUUCU	hsa-miR-520f-5p,CC[U/C]CUAAAGGGAAGCGCUUUCU	901	544	125	17.8545
1395	hsa-miR-515-5p	chr19	+	hsa-mir-515-2	Yes (53666691-53762418:46:HHC:hsa-mir-512-1/hsa-mir-512-2/hsa-mir-1323/hsa-mir-498/hsa-mir-520e/hsa-mir-515-1/hsa-mir-519e/hsa-mir-520f/hsa-mir-515-2/hsa-mir-519c/hsa-mir-1283-1/hsa-mir-520a/hsa-mir-526b/hsa-mir-519b/hsa-mir-525/hsa-mir-523/hsa-mir-518f/hsa-mir-520b/hsa-mir-518b/hsa-mir-526a-1/hsa-mir-520c/hsa-mir-518c/hsa-mir-524/hsa-mir-517a/hsa-mir-519d/hsa-mir-521-2/hsa-mir-520d/hsa-mir-517b/…	0
1396	hsa-miR-515-3p	chr19	+	hsa-mir-515-2	Yes (53666691-53762418:46:HHC:hsa-mir-512-1/hsa-mir-512-2/hsa-mir-1323/hsa-mir-498/hsa-mir-520e/hsa-mir-515-1/hsa-mir-519e/hsa-mir-520f/hsa-mir-515-2/hsa-mir-519c/hsa-mir-1283-1/hsa-mir-520a/hsa-mir-526b/hsa-mir-519b/hsa-mir-525/hsa-mir-523/hsa-mir-518f/hsa-mir-520b/hsa-mir-518b/hsa-mir-526a-1/hsa-mir-520c/hsa-mir-518c/hsa-mir-524/hsa-mir-517a/hsa-mir-519d/hsa-mir-521-2/hsa-mir-520d/hsa-mir-517b/…	0
1397	hsa-miR-519c-5p	chr19	+	hsa-mir-519c	Yes (53666691-53762418:46:HHC:hsa-mir-512-1/hsa-mir-512-2/hsa-mir-1323/hsa-mir-498/hsa-mir-520e/hsa-mir-515-1/hsa-mir-519e/hsa-mir-520f/hsa-mir-515-2/hsa-mir-519c/hsa-mir-1283-1/hsa-mir-520a/hsa-mir-526b/hsa-mir-519b/hsa-mir-525/hsa-mir-523/hsa-mir-518f/hsa-mir-520b/hsa-mir-518b/hsa-mir-526a-1/hsa-mir-520c/hsa-mir-518c/hsa-mir-524/hsa-mir-517a/hsa-mir-519d/hsa-mir-521-2/hsa-mir-520d/hsa-mir-517b/…	1	rs374584355	53686488	A > G	9.9e-05	5	CUCUAGAGGGAAGCGCUUUCUG	CUCUGGAGGGAAGCGCUUUCUG	hsa-miR-519c-5p,CUCU[A/G]GAGGGAAGCGCUUUCUG	539	762	89	13.8873
1398	hsa-miR-519c-3p	chr19	+	hsa-mir-519c	Yes (53666691-53762418:46:HHC:hsa-mir-512-1/hsa-mir-512-2/hsa-mir-1323/hsa-mir-498/hsa-mir-520e/hsa-mir-515-1/hsa-mir-519e/hsa-mir-520f/hsa-mir-515-2/hsa-mir-519c/hsa-mir-1283-1/hsa-mir-520a/hsa-mir-526b/hsa-mir-519b/hsa-mir-525/hsa-mir-523/hsa-mir-518f/hsa-mir-520b/hsa-mir-518b/hsa-mir-526a-1/hsa-mir-520c/hsa-mir-518c/hsa-mir-524/hsa-mir-517a/hsa-mir-519d/hsa-mir-521-2/hsa-mir-520d/hsa-mir-517b/…	1	rs764425172	53686529	A > G	8e-06	8	AAAGUGCAUCUUUUUAGAGGAU	AAAGUGCGUCUUUUUAGAGGAU	hsa-miR-519c-3p,AAAGUGC[A/G]UCUUUUUAGAGGAU	756	234	195	46.3624
1399	hsa-miR-1283	chr19	+	hsa-mir-1283-1	Yes (53666691-53762418:46:HHC:hsa-mir-512-1/hsa-mir-512-2/hsa-mir-1323/hsa-mir-498/hsa-mir-520e/hsa-mir-515-1/hsa-mir-519e/hsa-mir-520f/hsa-mir-515-2/hsa-mir-519c/hsa-mir-1283-1/hsa-mir-520a/hsa-mir-526b/hsa-mir-519b/hsa-mir-525/hsa-mir-523/hsa-mir-518f/hsa-mir-520b/hsa-mir-518b/hsa-mir-526a-1/hsa-mir-520c/hsa-mir-518c/hsa-mir-524/hsa-mir-517a/hsa-mir-519d/hsa-mir-521-2/hsa-mir-520d/hsa-mir-517b/…	1	rs372931855	53688497	A > G	1.7e-05	4	UCUACAAAGGAAAGCGCUUUCU	UCUGCAAAGGAAAGCGCUUUCU	hsa-miR-1283,UCU[A/G]CAAAGGAAAGCGCUUUCU	1090	1038	234	21.9991
1400	hsa-miR-520a-5p	chr19	+	hsa-mir-520a	Yes (53666691-53762418:46:HHC:hsa-mir-512-1/hsa-mir-512-2/hsa-mir-1323/hsa-mir-498/hsa-mir-520e/hsa-mir-515-1/hsa-mir-519e/hsa-mir-520f/hsa-mir-515-2/hsa-mir-519c/hsa-mir-1283-1/hsa-mir-520a/hsa-mir-526b/hsa-mir-519b/hsa-mir-525/hsa-mir-523/hsa-mir-518f/hsa-mir-520b/hsa-mir-518b/hsa-mir-526a-1/hsa-mir-520c/hsa-mir-518c/hsa-mir-524/hsa-mir-517a/hsa-mir-519d/hsa-mir-521-2/hsa-mir-520d/hsa-mir-517b/…	1	rs747333607	53690898	C > T	8e-06	4	CUCCAGAGGGAAGUACUUUCU	CUCUAGAGGGAAGUACUUUCU	hsa-miR-520a-5p,CUC[C/U]AGAGGGAAGUACUUUCU	823	539	85	12.7622
1401	hsa-miR-520a-3p	chr19	+	hsa-mir-520a	Yes (53666691-53762418:46:HHC:hsa-mir-512-1/hsa-mir-512-2/hsa-mir-1323/hsa-mir-498/hsa-mir-520e/hsa-mir-515-1/hsa-mir-519e/hsa-mir-520f/hsa-mir-515-2/hsa-mir-519c/hsa-mir-1283-1/hsa-mir-520a/hsa-mir-526b/hsa-mir-519b/hsa-mir-525/hsa-mir-523/hsa-mir-518f/hsa-mir-520b/hsa-mir-518b/hsa-mir-526a-1/hsa-mir-520c/hsa-mir-518c/hsa-mir-524/hsa-mir-517a/hsa-mir-519d/hsa-mir-521-2/hsa-mir-520d/hsa-mir-517b/…	2	rs773901679	53690940	T > C	8e-06	8	AAAGUGCUUCCCUUUGGACUGU	AAAGUGCCUCCCUUUGGACUGU	hsa-miR-520a-3p,AAAGUGC[U/C]UCCCUUUGGACUGU	690	490	232	39.8993
1401	hsa-miR-520a-3p	chr19	+	hsa-mir-520a	Yes (53666691-53762418:46:HHC:hsa-mir-512-1/hsa-mir-512-2/hsa-mir-1323/hsa-mir-498/hsa-mir-520e/hsa-mir-515-1/hsa-mir-519e/hsa-mir-520f/hsa-mir-515-2/hsa-mir-519c/hsa-mir-1283-1/hsa-mir-520a/hsa-mir-526b/hsa-mir-519b/hsa-mir-525/hsa-mir-523/hsa-mir-518f/hsa-mir-520b/hsa-mir-518b/hsa-mir-526a-1/hsa-mir-520c/hsa-mir-518c/hsa-mir-524/hsa-mir-517a/hsa-mir-519d/hsa-mir-521-2/hsa-mir-520d/hsa-mir-517b/…	2	rs770274241	53690937	T > C	8e-06	5	AAAGUGCUUCCCUUUGGACUGU	AAAGCGCUUCCCUUUGGACUGU	hsa-miR-520a-3p,AAAG[U/C]GCUUCCCUUUGGACUGU	690	23	1	0.793801
1402	hsa-miR-526b-5p	chr19	+	hsa-mir-526b	Yes (53666691-53762418:46:HHC:hsa-mir-512-1/hsa-mir-512-2/hsa-mir-1323/hsa-mir-498/hsa-mir-520e/hsa-mir-515-1/hsa-mir-519e/hsa-mir-520f/hsa-mir-515-2/hsa-mir-519c/hsa-mir-1283-1/hsa-mir-520a/hsa-mir-526b/hsa-mir-519b/hsa-mir-525/hsa-mir-523/hsa-mir-518f/hsa-mir-520b/hsa-mir-518b/hsa-mir-526a-1/hsa-mir-520c/hsa-mir-518c/hsa-mir-524/hsa-mir-517a/hsa-mir-519d/hsa-mir-521-2/hsa-mir-520d/hsa-mir-517b/…	0
1403	hsa-miR-526b-3p	chr19	+	hsa-mir-526b	Yes (53666691-53762418:46:HHC:hsa-mir-512-1/hsa-mir-512-2/hsa-mir-1323/hsa-mir-498/hsa-mir-520e/hsa-mir-515-1/hsa-mir-519e/hsa-mir-520f/hsa-mir-515-2/hsa-mir-519c/hsa-mir-1283-1/hsa-mir-520a/hsa-mir-526b/hsa-mir-519b/hsa-mir-525/hsa-mir-523/hsa-mir-518f/hsa-mir-520b/hsa-mir-518b/hsa-mir-526a-1/hsa-mir-520c/hsa-mir-518c/hsa-mir-524/hsa-mir-517a/hsa-mir-519d/hsa-mir-521-2/hsa-mir-520d/hsa-mir-517b/…	0
1404	hsa-miR-519b-5p	chr19	+	hsa-mir-519b	Yes (53666691-53762418:46:HHC:hsa-mir-512-1/hsa-mir-512-2/hsa-mir-1323/hsa-mir-498/hsa-mir-520e/hsa-mir-515-1/hsa-mir-519e/hsa-mir-520f/hsa-mir-515-2/hsa-mir-519c/hsa-mir-1283-1/hsa-mir-520a/hsa-mir-526b/hsa-mir-519b/hsa-mir-525/hsa-mir-523/hsa-mir-518f/hsa-mir-520b/hsa-mir-518b/hsa-mir-526a-1/hsa-mir-520c/hsa-mir-518c/hsa-mir-524/hsa-mir-517a/hsa-mir-519d/hsa-mir-521-2/hsa-mir-520d/hsa-mir-517b/…	1	rs367829576	53695227	C > G	9.7e-05	3	CUCUAGAGGGAAGCGCUUUCUG	CUGUAGAGGGAAGCGCUUUCUG	hsa-miR-519b-5p,CU[C/G]UAGAGGGAAGCGCUUUCUG	539	521	62	11.6998
1405	hsa-miR-519b-3p	chr19	+	hsa-mir-519b	Yes (53666691-53762418:46:HHC:hsa-mir-512-1/hsa-mir-512-2/hsa-mir-1323/hsa-mir-498/hsa-mir-520e/hsa-mir-515-1/hsa-mir-519e/hsa-mir-520f/hsa-mir-515-2/hsa-mir-519c/hsa-mir-1283-1/hsa-mir-520a/hsa-mir-526b/hsa-mir-519b/hsa-mir-525/hsa-mir-523/hsa-mir-518f/hsa-mir-520b/hsa-mir-518b/hsa-mir-526a-1/hsa-mir-520c/hsa-mir-518c/hsa-mir-524/hsa-mir-517a/hsa-mir-519d/hsa-mir-521-2/hsa-mir-520d/hsa-mir-517b/…	0
1406	hsa-miR-525-5p	chr19	+	hsa-mir-525	Yes (53666691-53762418:46:HHC:hsa-mir-512-1/hsa-mir-512-2/hsa-mir-1323/hsa-mir-498/hsa-mir-520e/hsa-mir-515-1/hsa-mir-519e/hsa-mir-520f/hsa-mir-515-2/hsa-mir-519c/hsa-mir-1283-1/hsa-mir-520a/hsa-mir-526b/hsa-mir-519b/hsa-mir-525/hsa-mir-523/hsa-mir-518f/hsa-mir-520b/hsa-mir-518b/hsa-mir-526a-1/hsa-mir-520c/hsa-mir-518c/hsa-mir-524/hsa-mir-517a/hsa-mir-519d/hsa-mir-521-2/hsa-mir-520d/hsa-mir-517b/…	0
1407	hsa-miR-525-3p	chr19	+	hsa-mir-525	Yes (53666691-53762418:46:HHC:hsa-mir-512-1/hsa-mir-512-2/hsa-mir-1323/hsa-mir-498/hsa-mir-520e/hsa-mir-515-1/hsa-mir-519e/hsa-mir-520f/hsa-mir-515-2/hsa-mir-519c/hsa-mir-1283-1/hsa-mir-520a/hsa-mir-526b/hsa-mir-519b/hsa-mir-525/hsa-mir-523/hsa-mir-518f/hsa-mir-520b/hsa-mir-518b/hsa-mir-526a-1/hsa-mir-520c/hsa-mir-518c/hsa-mir-524/hsa-mir-517a/hsa-mir-519d/hsa-mir-521-2/hsa-mir-520d/hsa-mir-517b/…	2	rs190453265	53697589	C > T	4e-05	6	GAAGGCGCUUCCCUUUAGAGCG	GAAGGUGCUUCCCUUUAGAGCG	hsa-miR-525-3p,GAAGG[C/U]GCUUCCCUUUAGAGCG	30	394	0	0
1407	hsa-miR-525-3p	chr19	+	hsa-mir-525	Yes (53666691-53762418:46:HHC:hsa-mir-512-1/hsa-mir-512-2/hsa-mir-1323/hsa-mir-498/hsa-mir-520e/hsa-mir-515-1/hsa-mir-519e/hsa-mir-520f/hsa-mir-515-2/hsa-mir-519c/hsa-mir-1283-1/hsa-mir-520a/hsa-mir-526b/hsa-mir-519b/hsa-mir-525/hsa-mir-523/hsa-mir-518f/hsa-mir-520b/hsa-mir-518b/hsa-mir-526a-1/hsa-mir-520c/hsa-mir-518c/hsa-mir-524/hsa-mir-517a/hsa-mir-519d/hsa-mir-521-2/hsa-mir-520d/hsa-mir-517b/…	2	rs745956492	53697590	G > A	3.3e-05	7	GAAGGCGCUUCCCUUUAGAGCG	GAAGGCACUUCCCUUUAGAGCG	hsa-miR-525-3p,GAAGGC[G/A]CUUCCCUUUAGAGCG	30	1024	4	2.28218
1408	hsa-miR-523-5p	chr19	+	hsa-mir-523	Yes (53666691-53762418:46:HHC:hsa-mir-512-1/hsa-mir-512-2/hsa-mir-1323/hsa-mir-498/hsa-mir-520e/hsa-mir-515-1/hsa-mir-519e/hsa-mir-520f/hsa-mir-515-2/hsa-mir-519c/hsa-mir-1283-1/hsa-mir-520a/hsa-mir-526b/hsa-mir-519b/hsa-mir-525/hsa-mir-523/hsa-mir-518f/hsa-mir-520b/hsa-mir-518b/hsa-mir-526a-1/hsa-mir-520c/hsa-mir-518c/hsa-mir-524/hsa-mir-517a/hsa-mir-519d/hsa-mir-521-2/hsa-mir-520d/hsa-mir-517b/…	0
1409	hsa-miR-523-3p	chr19	+	hsa-mir-523	Yes (53666691-53762418:46:HHC:hsa-mir-512-1/hsa-mir-512-2/hsa-mir-1323/hsa-mir-498/hsa-mir-520e/hsa-mir-515-1/hsa-mir-519e/hsa-mir-520f/hsa-mir-515-2/hsa-mir-519c/hsa-mir-1283-1/hsa-mir-520a/hsa-mir-526b/hsa-mir-519b/hsa-mir-525/hsa-mir-523/hsa-mir-518f/hsa-mir-520b/hsa-mir-518b/hsa-mir-526a-1/hsa-mir-520c/hsa-mir-518c/hsa-mir-524/hsa-mir-517a/hsa-mir-519d/hsa-mir-521-2/hsa-mir-520d/hsa-mir-517b/…	4	rs191624794	53698438	A > C	0.000543	2	GAACGCGCUUCCCUAUAGAGGGU	GCACGCGCUUCCCUAUAGAGGGU	hsa-miR-523-3p,G[A/C]ACGCGCUUCCCUAUAGAGGGU	11	7	0	0
1409	hsa-miR-523-3p	chr19	+	hsa-mir-523	Yes (53666691-53762418:46:HHC:hsa-mir-512-1/hsa-mir-512-2/hsa-mir-1323/hsa-mir-498/hsa-mir-520e/hsa-mir-515-1/hsa-mir-519e/hsa-mir-520f/hsa-mir-515-2/hsa-mir-519c/hsa-mir-1283-1/hsa-mir-520a/hsa-mir-526b/hsa-mir-519b/hsa-mir-525/hsa-mir-523/hsa-mir-518f/hsa-mir-520b/hsa-mir-518b/hsa-mir-526a-1/hsa-mir-520c/hsa-mir-518c/hsa-mir-524/hsa-mir-517a/hsa-mir-519d/hsa-mir-521-2/hsa-mir-520d/hsa-mir-517b/…	4	rs201232958	53698441	G > A	0.000176	5	GAACGCGCUUCCCUAUAGAGGGU	GAACACGCUUCCCUAUAGAGGGU	hsa-miR-523-3p,GAAC[G/A]CGCUUCCCUAUAGAGGGU	11	73	0	0
1409	hsa-miR-523-3p	chr19	+	hsa-mir-523	Yes (53666691-53762418:46:HHC:hsa-mir-512-1/hsa-mir-512-2/hsa-mir-1323/hsa-mir-498/hsa-mir-520e/hsa-mir-515-1/hsa-mir-519e/hsa-mir-520f/hsa-mir-515-2/hsa-mir-519c/hsa-mir-1283-1/hsa-mir-520a/hsa-mir-526b/hsa-mir-519b/hsa-mir-525/hsa-mir-523/hsa-mir-518f/hsa-mir-520b/hsa-mir-518b/hsa-mir-526a-1/hsa-mir-520c/hsa-mir-518c/hsa-mir-524/hsa-mir-517a/hsa-mir-519d/hsa-mir-521-2/hsa-mir-520d/hsa-mir-517b/…	4	rs367566532	53698443	G > A	0.000259	7	GAACGCGCUUCCCUAUAGAGGGU	GAACGCACUUCCCUAUAGAGGGU	hsa-miR-523-3p,GAACGC[G/A]CUUCCCUAUAGAGGGU	11	37	1	4.95682
1409	hsa-miR-523-3p	chr19	+	hsa-mir-523	Yes (53666691-53762418:46:HHC:hsa-mir-512-1/hsa-mir-512-2/hsa-mir-1323/hsa-mir-498/hsa-mir-520e/hsa-mir-515-1/hsa-mir-519e/hsa-mir-520f/hsa-mir-515-2/hsa-mir-519c/hsa-mir-1283-1/hsa-mir-520a/hsa-mir-526b/hsa-mir-519b/hsa-mir-525/hsa-mir-523/hsa-mir-518f/hsa-mir-520b/hsa-mir-518b/hsa-mir-526a-1/hsa-mir-520c/hsa-mir-518c/hsa-mir-524/hsa-mir-517a/hsa-mir-519d/hsa-mir-521-2/hsa-mir-520d/hsa-mir-517b/…	4	rs375309078	53698442	C > T	0.000117	6	GAACGCGCUUCCCUAUAGAGGGU	GAACGUGCUUCCCUAUAGAGGGU	hsa-miR-523-3p,GAACG[C/U]GCUUCCCUAUAGAGGGU	11	77	0	0
1410	hsa-miR-518f-5p	chr19	+	hsa-mir-518f	Yes (53666691-53762418:46:HHC:hsa-mir-512-1/hsa-mir-512-2/hsa-mir-1323/hsa-mir-498/hsa-mir-520e/hsa-mir-515-1/hsa-mir-519e/hsa-mir-520f/hsa-mir-515-2/hsa-mir-519c/hsa-mir-1283-1/hsa-mir-520a/hsa-mir-526b/hsa-mir-519b/hsa-mir-525/hsa-mir-523/hsa-mir-518f/hsa-mir-520b/hsa-mir-518b/hsa-mir-526a-1/hsa-mir-520c/hsa-mir-518c/hsa-mir-524/hsa-mir-517a/hsa-mir-519d/hsa-mir-521-2/hsa-mir-520d/hsa-mir-517b/…	2	rs747675691	53700037	G > A	8e-06	8	CUCUAGAGGGAAGCACUUUCUC	CUCUAGAAGGAAGCACUUUCUC	hsa-miR-518f-5p,CUCUAGA[G/A]GGAAGCACUUUCUC	539	893	291	41.9443
1410	hsa-miR-518f-5p	chr19	+	hsa-mir-518f	Yes (53666691-53762418:46:HHC:hsa-mir-512-1/hsa-mir-512-2/hsa-mir-1323/hsa-mir-498/hsa-mir-520e/hsa-mir-515-1/hsa-mir-519e/hsa-mir-520f/hsa-mir-515-2/hsa-mir-519c/hsa-mir-1283-1/hsa-mir-520a/hsa-mir-526b/hsa-mir-519b/hsa-mir-525/hsa-mir-523/hsa-mir-518f/hsa-mir-520b/hsa-mir-518b/hsa-mir-526a-1/hsa-mir-520c/hsa-mir-518c/hsa-mir-524/hsa-mir-517a/hsa-mir-519d/hsa-mir-521-2/hsa-mir-520d/hsa-mir-517b/…	2	rs778381037	53700034	A > C	8e-06	5	CUCUAGAGGGAAGCACUUUCUC	CUCUCGAGGGAAGCACUUUCUC	hsa-miR-518f-5p,CUCU[A/C]GAGGGAAGCACUUUCUC	539	33	4	2.99922
1411	hsa-miR-518f-3p	chr19	+	hsa-mir-518f	Yes (53666691-53762418:46:HHC:hsa-mir-512-1/hsa-mir-512-2/hsa-mir-1323/hsa-mir-498/hsa-mir-520e/hsa-mir-515-1/hsa-mir-519e/hsa-mir-520f/hsa-mir-515-2/hsa-mir-519c/hsa-mir-1283-1/hsa-mir-520a/hsa-mir-526b/hsa-mir-519b/hsa-mir-525/hsa-mir-523/hsa-mir-518f/hsa-mir-520b/hsa-mir-518b/hsa-mir-526a-1/hsa-mir-520c/hsa-mir-518c/hsa-mir-524/hsa-mir-517a/hsa-mir-519d/hsa-mir-521-2/hsa-mir-520d/hsa-mir-517b/…	1	rs557837040	53700072	C > T	8e-05	6	GAAAGCGCUUCUCUUUAGAGG	GAAAGUGCUUCUCUUUAGAGG	hsa-miR-518f-3p,GAAAG[C/U]GCUUCUCUUUAGAGG	64	1304	14	4.84618
1412	hsa-miR-520b	chr19	+	hsa-mir-520b	Yes (53666691-53762418:46:HHC:hsa-mir-512-1/hsa-mir-512-2/hsa-mir-1323/hsa-mir-498/hsa-mir-520e/hsa-mir-515-1/hsa-mir-519e/hsa-mir-520f/hsa-mir-515-2/hsa-mir-519c/hsa-mir-1283-1/hsa-mir-520a/hsa-mir-526b/hsa-mir-519b/hsa-mir-525/hsa-mir-523/hsa-mir-518f/hsa-mir-520b/hsa-mir-518b/hsa-mir-526a-1/hsa-mir-520c/hsa-mir-518c/hsa-mir-524/hsa-mir-517a/hsa-mir-519d/hsa-mir-521-2/hsa-mir-520d/hsa-mir-517b/…	1	rs748264176	53701272	G > C	8e-06	6	AAAGUGCUUCCUUUUAGAGGG	AAAGUCCUUCCUUUUAGAGGG	hsa-miR-520b,AAAGU[G/C]CUUCCUUUUAGAGGG	690	438	66	12.0056
1413	hsa-miR-518b	chr19	+	hsa-mir-518b	Yes (53666691-53762418:46:HHC:hsa-mir-512-1/hsa-mir-512-2/hsa-mir-1323/hsa-mir-498/hsa-mir-520e/hsa-mir-515-1/hsa-mir-519e/hsa-mir-520f/hsa-mir-515-2/hsa-mir-519c/hsa-mir-1283-1/hsa-mir-520a/hsa-mir-526b/hsa-mir-519b/hsa-mir-525/hsa-mir-523/hsa-mir-518f/hsa-mir-520b/hsa-mir-518b/hsa-mir-526a-1/hsa-mir-520c/hsa-mir-518c/hsa-mir-524/hsa-mir-517a/hsa-mir-519d/hsa-mir-521-2/hsa-mir-520d/hsa-mir-517b/…	2	rs775783296	53702792	C > T	8e-06	6	CAAAGCGCUCCCCUUUAGAGGU	CAAAGUGCUCCCCUUUAGAGGU	hsa-miR-518b,CAAAG[C/U]GCUCCCCUUUAGAGGU	64	1304	14	4.84618
1413	hsa-miR-518b	chr19	+	hsa-mir-518b	Yes (53666691-53762418:46:HHC:hsa-mir-512-1/hsa-mir-512-2/hsa-mir-1323/hsa-mir-498/hsa-mir-520e/hsa-mir-515-1/hsa-mir-519e/hsa-mir-520f/hsa-mir-515-2/hsa-mir-519c/hsa-mir-1283-1/hsa-mir-520a/hsa-mir-526b/hsa-mir-519b/hsa-mir-525/hsa-mir-523/hsa-mir-518f/hsa-mir-520b/hsa-mir-518b/hsa-mir-526a-1/hsa-mir-520c/hsa-mir-518c/hsa-mir-524/hsa-mir-517a/hsa-mir-519d/hsa-mir-521-2/hsa-mir-520d/hsa-mir-517b/…	2	rs370559290	53702793	G > A	8e-06	7	CAAAGCGCUCCCCUUUAGAGGU	CAAAGCACUCCCCUUUAGAGGU	hsa-miR-518b,CAAAGC[G/A]CUCCCCUUUAGAGGU	64	1668	22	6.7334
1414	hsa-miR-526a	chr19	+	hsa-mir-526a-1	Yes (53666691-53762418:46:HHC:hsa-mir-512-1/hsa-mir-512-2/hsa-mir-1323/hsa-mir-498/hsa-mir-520e/hsa-mir-515-1/hsa-mir-519e/hsa-mir-520f/hsa-mir-515-2/hsa-mir-519c/hsa-mir-1283-1/hsa-mir-520a/hsa-mir-526b/hsa-mir-519b/hsa-mir-525/hsa-mir-523/hsa-mir-518f/hsa-mir-520b/hsa-mir-518b/hsa-mir-526a-1/hsa-mir-520c/hsa-mir-518c/hsa-mir-524/hsa-mir-517a/hsa-mir-519d/hsa-mir-521-2/hsa-mir-520d/hsa-mir-517b/…	1	rs577158584	53706273	G > A	7.1e-05	8	CUCUAGAGGGAAGCACUUUCUG	CUCUAGAAGGAAGCACUUUCUG	hsa-miR-526a,CUCUAGA[G/A]GGAAGCACUUUCUG	539	474	267	52.8236
1415	hsa-miR-520c-5p	chr19	+	hsa-mir-520c	Yes (53666691-53762418:46:HHC:hsa-mir-512-1/hsa-mir-512-2/hsa-mir-1323/hsa-mir-498/hsa-mir-520e/hsa-mir-515-1/hsa-mir-519e/hsa-mir-520f/hsa-mir-515-2/hsa-mir-519c/hsa-mir-1283-1/hsa-mir-520a/hsa-mir-526b/hsa-mir-519b/hsa-mir-525/hsa-mir-523/hsa-mir-518f/hsa-mir-520b/hsa-mir-518b/hsa-mir-526a-1/hsa-mir-520c/hsa-mir-518c/hsa-mir-524/hsa-mir-517a/hsa-mir-519d/hsa-mir-521-2/hsa-mir-520d/hsa-mir-517b/…	1	rs765583544	53707475	G > A	8e-06	8	CUCUAGAGGGAAGCACUUUCUG	CUCUAGAAGGAAGCACUUUCUG	hsa-miR-520c-5p,CUCUAGA[G/A]GGAAGCACUUUCUG	539	893	291	41.9443
1416	hsa-miR-520c-3p	chr19	+	hsa-mir-520c	Yes (53666691-53762418:46:HHC:hsa-mir-512-1/hsa-mir-512-2/hsa-mir-1323/hsa-mir-498/hsa-mir-520e/hsa-mir-515-1/hsa-mir-519e/hsa-mir-520f/hsa-mir-515-2/hsa-mir-519c/hsa-mir-1283-1/hsa-mir-520a/hsa-mir-526b/hsa-mir-519b/hsa-mir-525/hsa-mir-523/hsa-mir-518f/hsa-mir-520b/hsa-mir-518b/hsa-mir-526a-1/hsa-mir-520c/hsa-mir-518c/hsa-mir-524/hsa-mir-517a/hsa-mir-519d/hsa-mir-521-2/hsa-mir-520d/hsa-mir-517b/…	0
1417	hsa-miR-518c-5p	chr19	+	hsa-mir-518c	Yes (53666691-53762418:46:HHC:hsa-mir-512-1/hsa-mir-512-2/hsa-mir-1323/hsa-mir-498/hsa-mir-520e/hsa-mir-515-1/hsa-mir-519e/hsa-mir-520f/hsa-mir-515-2/hsa-mir-519c/hsa-mir-1283-1/hsa-mir-520a/hsa-mir-526b/hsa-mir-519b/hsa-mir-525/hsa-mir-523/hsa-mir-518f/hsa-mir-520b/hsa-mir-518b/hsa-mir-526a-1/hsa-mir-520c/hsa-mir-518c/hsa-mir-524/hsa-mir-517a/hsa-mir-519d/hsa-mir-521-2/hsa-mir-520d/hsa-mir-517b/…	0
1418	hsa-miR-518c-3p	chr19	+	hsa-mir-518c	Yes (53666691-53762418:46:HHC:hsa-mir-512-1/hsa-mir-512-2/hsa-mir-1323/hsa-mir-498/hsa-mir-520e/hsa-mir-515-1/hsa-mir-519e/hsa-mir-520f/hsa-mir-515-2/hsa-mir-519c/hsa-mir-1283-1/hsa-mir-520a/hsa-mir-526b/hsa-mir-519b/hsa-mir-525/hsa-mir-523/hsa-mir-518f/hsa-mir-520b/hsa-mir-518b/hsa-mir-526a-1/hsa-mir-520c/hsa-mir-518c/hsa-mir-524/hsa-mir-517a/hsa-mir-519d/hsa-mir-521-2/hsa-mir-520d/hsa-mir-517b/…	0
1419	hsa-miR-524-5p	chr19	+	hsa-mir-524	Yes (53666691-53762418:46:HHC:hsa-mir-512-1/hsa-mir-512-2/hsa-mir-1323/hsa-mir-498/hsa-mir-520e/hsa-mir-515-1/hsa-mir-519e/hsa-mir-520f/hsa-mir-515-2/hsa-mir-519c/hsa-mir-1283-1/hsa-mir-520a/hsa-mir-526b/hsa-mir-519b/hsa-mir-525/hsa-mir-523/hsa-mir-518f/hsa-mir-520b/hsa-mir-518b/hsa-mir-526a-1/hsa-mir-520c/hsa-mir-518c/hsa-mir-524/hsa-mir-517a/hsa-mir-519d/hsa-mir-521-2/hsa-mir-520d/hsa-mir-517b/…	1	rs374426690	53711021	A > G	5.8e-05	5	CUACAAAGGGAAGCACUUUCUC	CUACGAAGGGAAGCACUUUCUC	hsa-miR-524-5p,CUAC[A/G]AAGGGAAGCACUUUCUC	2503	70	32	7.64488
1420	hsa-miR-524-3p	chr19	+	hsa-mir-524	Yes (53666691-53762418:46:HHC:hsa-mir-512-1/hsa-mir-512-2/hsa-mir-1323/hsa-mir-498/hsa-mir-520e/hsa-mir-515-1/hsa-mir-519e/hsa-mir-520f/hsa-mir-515-2/hsa-mir-519c/hsa-mir-1283-1/hsa-mir-520a/hsa-mir-526b/hsa-mir-519b/hsa-mir-525/hsa-mir-523/hsa-mir-518f/hsa-mir-520b/hsa-mir-518b/hsa-mir-526a-1/hsa-mir-520c/hsa-mir-518c/hsa-mir-524/hsa-mir-517a/hsa-mir-519d/hsa-mir-521-2/hsa-mir-520d/hsa-mir-517b/…	3	rs778994994	53711056	A > T	1.7e-05	3	GAAGGCGCUUCCCUUUGGAGU	GAUGGCGCUUCCCUUUGGAGU	hsa-miR-524-3p,GA[A/U]GGCGCUUCCCUUUGGAGU	30	31	0	0
1420	hsa-miR-524-3p	chr19	+	hsa-mir-524	Yes (53666691-53762418:46:HHC:hsa-mir-512-1/hsa-mir-512-2/hsa-mir-1323/hsa-mir-498/hsa-mir-520e/hsa-mir-515-1/hsa-mir-519e/hsa-mir-520f/hsa-mir-515-2/hsa-mir-519c/hsa-mir-1283-1/hsa-mir-520a/hsa-mir-526b/hsa-mir-519b/hsa-mir-525/hsa-mir-523/hsa-mir-518f/hsa-mir-520b/hsa-mir-518b/hsa-mir-526a-1/hsa-mir-520c/hsa-mir-518c/hsa-mir-524/hsa-mir-517a/hsa-mir-519d/hsa-mir-521-2/hsa-mir-520d/hsa-mir-517b/…	3	rs747268431	53711060	G > A	8e-06	7	GAAGGCGCUUCCCUUUGGAGU	GAAGGCACUUCCCUUUGGAGU	hsa-miR-524-3p,GAAGGC[G/A]CUUCCCUUUGGAGU	30	1024	4	2.28218
1420	hsa-miR-524-3p	chr19	+	hsa-mir-524	Yes (53666691-53762418:46:HHC:hsa-mir-512-1/hsa-mir-512-2/hsa-mir-1323/hsa-mir-498/hsa-mir-520e/hsa-mir-515-1/hsa-mir-519e/hsa-mir-520f/hsa-mir-515-2/hsa-mir-519c/hsa-mir-1283-1/hsa-mir-520a/hsa-mir-526b/hsa-mir-519b/hsa-mir-525/hsa-mir-523/hsa-mir-518f/hsa-mir-520b/hsa-mir-518b/hsa-mir-526a-1/hsa-mir-520c/hsa-mir-518c/hsa-mir-524/hsa-mir-517a/hsa-mir-519d/hsa-mir-521-2/hsa-mir-520d/hsa-mir-517b/…	3	rs777997979	53711059	C > T	8e-06	6	GAAGGCGCUUCCCUUUGGAGU	GAAGGUGCUUCCCUUUGGAGU	hsa-miR-524-3p,GAAGG[C/U]GCUUCCCUUUGGAGU	30	394	0	0
1421	hsa-miR-517-5p	chr19	+	hsa-mir-517a	Yes (53666691-53762418:46:HHC:hsa-mir-512-1/hsa-mir-512-2/hsa-mir-1323/hsa-mir-498/hsa-mir-520e/hsa-mir-515-1/hsa-mir-519e/hsa-mir-520f/hsa-mir-515-2/hsa-mir-519c/hsa-mir-1283-1/hsa-mir-520a/hsa-mir-526b/hsa-mir-519b/hsa-mir-525/hsa-mir-523/hsa-mir-518f/hsa-mir-520b/hsa-mir-518b/hsa-mir-526a-1/hsa-mir-520c/hsa-mir-518c/hsa-mir-524/hsa-mir-517a/hsa-mir-519d/hsa-mir-521-2/hsa-mir-520d/hsa-mir-517b/…	1	rs756402670	53712288	G > C	8e-06	7	CCUCUAGAUGGAAGCACUGUCU	CCUCUACAUGGAAGCACUGUCU	hsa-miR-517-5p,CCUCUA[G/C]AUGGAAGCACUGUCU	433	505	41	8.76787
1422	hsa-miR-517a-3p	chr19	+	hsa-mir-517a	Yes (53666691-53762418:46:HHC:hsa-mir-512-1/hsa-mir-512-2/hsa-mir-1323/hsa-mir-498/hsa-mir-520e/hsa-mir-515-1/hsa-mir-519e/hsa-mir-520f/hsa-mir-515-2/hsa-mir-519c/hsa-mir-1283-1/hsa-mir-520a/hsa-mir-526b/hsa-mir-519b/hsa-mir-525/hsa-mir-523/hsa-mir-518f/hsa-mir-520b/hsa-mir-518b/hsa-mir-526a-1/hsa-mir-520c/hsa-mir-518c/hsa-mir-524/hsa-mir-517a/hsa-mir-519d/hsa-mir-521-2/hsa-mir-520d/hsa-mir-517b/…	2	rs746533919	53712326	G > C	8e-06	6	AUCGUGCAUCCCUUUAGAGUGU	AUCGUCCAUCCCUUUAGAGUGU	hsa-miR-517a-3p,AUCGU[G/C]CAUCCCUUUAGAGUGU	41	41	0	0
1422	hsa-miR-517a-3p	chr19	+	hsa-mir-517a	Yes (53666691-53762418:46:HHC:hsa-mir-512-1/hsa-mir-512-2/hsa-mir-1323/hsa-mir-498/hsa-mir-520e/hsa-mir-515-1/hsa-mir-519e/hsa-mir-520f/hsa-mir-515-2/hsa-mir-519c/hsa-mir-1283-1/hsa-mir-520a/hsa-mir-526b/hsa-mir-519b/hsa-mir-525/hsa-mir-523/hsa-mir-518f/hsa-mir-520b/hsa-mir-518b/hsa-mir-526a-1/hsa-mir-520c/hsa-mir-518c/hsa-mir-524/hsa-mir-517a/hsa-mir-519d/hsa-mir-521-2/hsa-mir-520d/hsa-mir-517b/…	2	rs772783734	53712324	G > A	8e-06	4	AUCGUGCAUCCCUUUAGAGUGU	AUCAUGCAUCCCUUUAGAGUGU	hsa-miR-517a-3p,AUC[G/A]UGCAUCCCUUUAGAGUGU	41	577	4	2.60064
1423	hsa-miR-519d-3p	chr19	+	hsa-mir-519d	Yes (53666691-53762418:46:HHC:hsa-mir-512-1/hsa-mir-512-2/hsa-mir-1323/hsa-mir-498/hsa-mir-520e/hsa-mir-515-1/hsa-mir-519e/hsa-mir-520f/hsa-mir-515-2/hsa-mir-519c/hsa-mir-1283-1/hsa-mir-520a/hsa-mir-526b/hsa-mir-519b/hsa-mir-525/hsa-mir-523/hsa-mir-518f/hsa-mir-520b/hsa-mir-518b/hsa-mir-526a-1/hsa-mir-520c/hsa-mir-518c/hsa-mir-524/hsa-mir-517a/hsa-mir-519d/hsa-mir-521-2/hsa-mir-520d/hsa-mir-517b/…	2	rs764695340	53713405	T > G	4.1e-05	6	CAAAGUGCCUCCCUUUAGAGUG	CAAAGGGCCUCCCUUUAGAGUG	hsa-miR-519d-3p,CAAAG[U/G]GCCUCCCUUUAGAGUG	1304	730	178	18.244
1423	hsa-miR-519d-3p	chr19	+	hsa-mir-519d	Yes (53666691-53762418:46:HHC:hsa-mir-512-1/hsa-mir-512-2/hsa-mir-1323/hsa-mir-498/hsa-mir-520e/hsa-mir-515-1/hsa-mir-519e/hsa-mir-520f/hsa-mir-515-2/hsa-mir-519c/hsa-mir-1283-1/hsa-mir-520a/hsa-mir-526b/hsa-mir-519b/hsa-mir-525/hsa-mir-523/hsa-mir-518f/hsa-mir-520b/hsa-mir-518b/hsa-mir-526a-1/hsa-mir-520c/hsa-mir-518c/hsa-mir-524/hsa-mir-517a/hsa-mir-519d/hsa-mir-521-2/hsa-mir-520d/hsa-mir-517b/…	2	rs752048127	53713406	G > T	8e-06	7	CAAAGUGCCUCCCUUUAGAGUG	CAAAGUUCCUCCCUUUAGAGUG	hsa-miR-519d-3p,CAAAGU[G/U]CCUCCCUUUAGAGUG	1304	1433	365	26.7012
1424	hsa-miR-519d-5p	chr19	+	hsa-mir-519d	Yes (53666691-53762418:46:HHC:hsa-mir-512-1/hsa-mir-512-2/hsa-mir-1323/hsa-mir-498/hsa-mir-520e/hsa-mir-515-1/hsa-mir-519e/hsa-mir-520f/hsa-mir-515-2/hsa-mir-519c/hsa-mir-1283-1/hsa-mir-520a/hsa-mir-526b/hsa-mir-519b/hsa-mir-525/hsa-mir-523/hsa-mir-518f/hsa-mir-520b/hsa-mir-518b/hsa-mir-526a-1/hsa-mir-520c/hsa-mir-518c/hsa-mir-524/hsa-mir-517a/hsa-mir-519d/hsa-mir-521-2/hsa-mir-520d/hsa-mir-517b/…	3	rs376138952	53713362	C > T	0.000111	2	CCUCCAAAGGGAAGCGCUUUCUGUU	CUUCCAAAGGGAAGCGCUUUCUGUU	hsa-miR-519d-5p,C[C/U]UCCAAAGGGAAGCGCUUUCUGUU	1027	1929	328	23.3036
1424	hsa-miR-519d-5p	chr19	+	hsa-mir-519d	Yes (53666691-53762418:46:HHC:hsa-mir-512-1/hsa-mir-512-2/hsa-mir-1323/hsa-mir-498/hsa-mir-520e/hsa-mir-515-1/hsa-mir-519e/hsa-mir-520f/hsa-mir-515-2/hsa-mir-519c/hsa-mir-1283-1/hsa-mir-520a/hsa-mir-526b/hsa-mir-519b/hsa-mir-525/hsa-mir-523/hsa-mir-518f/hsa-mir-520b/hsa-mir-518b/hsa-mir-526a-1/hsa-mir-520c/hsa-mir-518c/hsa-mir-524/hsa-mir-517a/hsa-mir-519d/hsa-mir-521-2/hsa-mir-520d/hsa-mir-517b/…	3	rs754087399	53713365	C > T	6.6e-05	5	CCUCCAAAGGGAAGCGCUUUCUGUU	CCUCUAAAGGGAAGCGCUUUCUGUU	hsa-miR-519d-5p,CCUC[C/U]AAAGGGAAGCGCUUUCUGUU	1027	901	170	17.6726
1424	hsa-miR-519d-5p	chr19	+	hsa-mir-519d	Yes (53666691-53762418:46:HHC:hsa-mir-512-1/hsa-mir-512-2/hsa-mir-1323/hsa-mir-498/hsa-mir-520e/hsa-mir-515-1/hsa-mir-519e/hsa-mir-520f/hsa-mir-515-2/hsa-mir-519c/hsa-mir-1283-1/hsa-mir-520a/hsa-mir-526b/hsa-mir-519b/hsa-mir-525/hsa-mir-523/hsa-mir-518f/hsa-mir-520b/hsa-mir-518b/hsa-mir-526a-1/hsa-mir-520c/hsa-mir-518c/hsa-mir-524/hsa-mir-517a/hsa-mir-519d/hsa-mir-521-2/hsa-mir-520d/hsa-mir-517b/…	3	rs766604553	53713364	C > A	8e-06	4	CCUCCAAAGGGAAGCGCUUUCUGUU	CCUACAAAGGGAAGCGCUUUCUGUU	hsa-miR-519d-5p,CCU[C/A]CAAAGGGAAGCGCUUUCUGUU	1027	1090	209	19.7537
1425	hsa-miR-521	chr19	+	hsa-mir-521-2	Yes (53666691-53762418:46:HHC:hsa-mir-512-1/hsa-mir-512-2/hsa-mir-1323/hsa-mir-498/hsa-mir-520e/hsa-mir-515-1/hsa-mir-519e/hsa-mir-520f/hsa-mir-515-2/hsa-mir-519c/hsa-mir-1283-1/hsa-mir-520a/hsa-mir-526b/hsa-mir-519b/hsa-mir-525/hsa-mir-523/hsa-mir-518f/hsa-mir-520b/hsa-mir-518b/hsa-mir-526a-1/hsa-mir-520c/hsa-mir-518c/hsa-mir-524/hsa-mir-517a/hsa-mir-519d/hsa-mir-521-2/hsa-mir-520d/hsa-mir-517b/…	2	rs372430140	53716650	G > A	0.000119	4	AACGCACUUCCCUUUAGAGUGU	AACACACUUCCCUUUAGAGUGU	hsa-miR-521,AAC[G/A]CACUUCCCUUUAGAGUGU	49	1436	18	6.78574
1425	hsa-miR-521	chr19	+	hsa-mir-521-2	Yes (53666691-53762418:46:HHC:hsa-mir-512-1/hsa-mir-512-2/hsa-mir-1323/hsa-mir-498/hsa-mir-520e/hsa-mir-515-1/hsa-mir-519e/hsa-mir-520f/hsa-mir-515-2/hsa-mir-519c/hsa-mir-1283-1/hsa-mir-520a/hsa-mir-526b/hsa-mir-519b/hsa-mir-525/hsa-mir-523/hsa-mir-518f/hsa-mir-520b/hsa-mir-518b/hsa-mir-526a-1/hsa-mir-520c/hsa-mir-518c/hsa-mir-524/hsa-mir-517a/hsa-mir-519d/hsa-mir-521-2/hsa-mir-520d/hsa-mir-517b/…	2	rs777553091	53716648	A > G	8e-06	2	AACGCACUUCCCUUUAGAGUGU	AGCGCACUUCCCUUUAGAGUGU	hsa-miR-521,A[A/G]CGCACUUCCCUUUAGAGUGU	49	22	0	0
1426	hsa-miR-520d-5p	chr19	+	hsa-mir-520d	Yes (53666691-53762418:46:HHC:hsa-mir-512-1/hsa-mir-512-2/hsa-mir-1323/hsa-mir-498/hsa-mir-520e/hsa-mir-515-1/hsa-mir-519e/hsa-mir-520f/hsa-mir-515-2/hsa-mir-519c/hsa-mir-1283-1/hsa-mir-520a/hsa-mir-526b/hsa-mir-519b/hsa-mir-525/hsa-mir-523/hsa-mir-518f/hsa-mir-520b/hsa-mir-518b/hsa-mir-526a-1/hsa-mir-520c/hsa-mir-518c/hsa-mir-524/hsa-mir-517a/hsa-mir-519d/hsa-mir-521-2/hsa-mir-520d/hsa-mir-517b/…	1	rs763748792	53720113	A > G	8e-06	3	CUACAAAGGGAAGCCCUUUC	CUGCAAAGGGAAGCCCUUUC	hsa-miR-520d-5p,CU[A/G]CAAAGGGAAGCCCUUUC	2503	1258	595	33.531
1427	hsa-miR-520d-3p	chr19	+	hsa-mir-520d	Yes (53666691-53762418:46:HHC:hsa-mir-512-1/hsa-mir-512-2/hsa-mir-1323/hsa-mir-498/hsa-mir-520e/hsa-mir-515-1/hsa-mir-519e/hsa-mir-520f/hsa-mir-515-2/hsa-mir-519c/hsa-mir-1283-1/hsa-mir-520a/hsa-mir-526b/hsa-mir-519b/hsa-mir-525/hsa-mir-523/hsa-mir-518f/hsa-mir-520b/hsa-mir-518b/hsa-mir-526a-1/hsa-mir-520c/hsa-mir-518c/hsa-mir-524/hsa-mir-517a/hsa-mir-519d/hsa-mir-521-2/hsa-mir-520d/hsa-mir-517b/…	2	rs779020662	53720150	A > C	8e-06	2	AAAGUGCUUCUCUUUGGUGGGU	ACAGUGCUUCUCUUUGGUGGGU	hsa-miR-520d-3p,A[A/C]AGUGCUUCUCUUUGGUGGGU	690	579	75	11.8658
1427	hsa-miR-520d-3p	chr19	+	hsa-mir-520d	Yes (53666691-53762418:46:HHC:hsa-mir-512-1/hsa-mir-512-2/hsa-mir-1323/hsa-mir-498/hsa-mir-520e/hsa-mir-515-1/hsa-mir-519e/hsa-mir-520f/hsa-mir-515-2/hsa-mir-519c/hsa-mir-1283-1/hsa-mir-520a/hsa-mir-526b/hsa-mir-519b/hsa-mir-525/hsa-mir-523/hsa-mir-518f/hsa-mir-520b/hsa-mir-518b/hsa-mir-526a-1/hsa-mir-520c/hsa-mir-518c/hsa-mir-524/hsa-mir-517a/hsa-mir-519d/hsa-mir-521-2/hsa-mir-520d/hsa-mir-517b/…	2	rs201279305	53720154	G > A	8e-06	6	AAAGUGCUUCUCUUUGGUGGGU	AAAGUACUUCUCUUUGGUGGGU	hsa-miR-520d-3p,AAAGU[G/A]CUUCUCUUUGGUGGGU	690	622	103	15.7224
1428	hsa-miR-517-5p	chr19	+	hsa-mir-517b	Yes (53666691-53762418:46:HHC:hsa-mir-512-1/hsa-mir-512-2/hsa-mir-1323/hsa-mir-498/hsa-mir-520e/hsa-mir-515-1/hsa-mir-519e/hsa-mir-520f/hsa-mir-515-2/hsa-mir-519c/hsa-mir-1283-1/hsa-mir-520a/hsa-mir-526b/hsa-mir-519b/hsa-mir-525/hsa-mir-523/hsa-mir-518f/hsa-mir-520b/hsa-mir-518b/hsa-mir-526a-1/hsa-mir-520c/hsa-mir-518c/hsa-mir-524/hsa-mir-517a/hsa-mir-519d/hsa-mir-521-2/hsa-mir-520d/hsa-mir-517b/…	1	rs776487317	53721082	C > T	8e-06	2	CCUCUAGAUGGAAGCACUGUCU	CUUCUAGAUGGAAGCACUGUCU	hsa-miR-517-5p,C[C/U]UCUAGAUGGAAGCACUGUCU	433	923	81	12.8127
1429	hsa-miR-517b-3p	chr19	+	hsa-mir-517b	Yes (53666691-53762418:46:HHC:hsa-mir-512-1/hsa-mir-512-2/hsa-mir-1323/hsa-mir-498/hsa-mir-520e/hsa-mir-515-1/hsa-mir-519e/hsa-mir-520f/hsa-mir-515-2/hsa-mir-519c/hsa-mir-1283-1/hsa-mir-520a/hsa-mir-526b/hsa-mir-519b/hsa-mir-525/hsa-mir-523/hsa-mir-518f/hsa-mir-520b/hsa-mir-518b/hsa-mir-526a-1/hsa-mir-520c/hsa-mir-518c/hsa-mir-524/hsa-mir-517a/hsa-mir-519d/hsa-mir-521-2/hsa-mir-520d/hsa-mir-517b/…	0
1430	hsa-miR-520g-3p	chr19	+	hsa-mir-520g	Yes (53666691-53762418:46:HHC:hsa-mir-512-1/hsa-mir-512-2/hsa-mir-1323/hsa-mir-498/hsa-mir-520e/hsa-mir-515-1/hsa-mir-519e/hsa-mir-520f/hsa-mir-515-2/hsa-mir-519c/hsa-mir-1283-1/hsa-mir-520a/hsa-mir-526b/hsa-mir-519b/hsa-mir-525/hsa-mir-523/hsa-mir-518f/hsa-mir-520b/hsa-mir-518b/hsa-mir-526a-1/hsa-mir-520c/hsa-mir-518c/hsa-mir-524/hsa-mir-517a/hsa-mir-519d/hsa-mir-521-2/hsa-mir-520d/hsa-mir-517b/…	2	rs755388007	53722222	A > G	8e-06	3	ACAAAGUGCUUCCCUUUAGAGUGU	ACGAAGUGCUUCCCUUUAGAGUGU	hsa-miR-520g-3p,AC[A/G]AAGUGCUUCCCUUUAGAGUGU	1062	48	11	4.87203
1430	hsa-miR-520g-3p	chr19	+	hsa-mir-520g	Yes (53666691-53762418:46:HHC:hsa-mir-512-1/hsa-mir-512-2/hsa-mir-1323/hsa-mir-498/hsa-mir-520e/hsa-mir-515-1/hsa-mir-519e/hsa-mir-520f/hsa-mir-515-2/hsa-mir-519c/hsa-mir-1283-1/hsa-mir-520a/hsa-mir-526b/hsa-mir-519b/hsa-mir-525/hsa-mir-523/hsa-mir-518f/hsa-mir-520b/hsa-mir-518b/hsa-mir-526a-1/hsa-mir-520c/hsa-mir-518c/hsa-mir-524/hsa-mir-517a/hsa-mir-519d/hsa-mir-521-2/hsa-mir-520d/hsa-mir-517b/…	2	rs765799681	53722227	G > A	4.1e-05	8	ACAAAGUGCUUCCCUUUAGAGUGU	ACAAAGUACUUCCCUUUAGAGUGU	hsa-miR-520g-3p,ACAAAGU[G/A]CUUCCCUUUAGAGUGU	1062	1217	650	57.175
1431	hsa-miR-520g-5p	chr19	+	hsa-mir-520g	Yes (53666691-53762418:46:HHC:hsa-mir-512-1/hsa-mir-512-2/hsa-mir-1323/hsa-mir-498/hsa-mir-520e/hsa-mir-515-1/hsa-mir-519e/hsa-mir-520f/hsa-mir-515-2/hsa-mir-519c/hsa-mir-1283-1/hsa-mir-520a/hsa-mir-526b/hsa-mir-519b/hsa-mir-525/hsa-mir-523/hsa-mir-518f/hsa-mir-520b/hsa-mir-518b/hsa-mir-526a-1/hsa-mir-520c/hsa-mir-518c/hsa-mir-524/hsa-mir-517a/hsa-mir-519d/hsa-mir-521-2/hsa-mir-520d/hsa-mir-517b/…	3	rs761921741	53722189	G > A	8e-06	8	UCUAGAGGAAGCACUUUCUGUUU	UCUAGAGAAAGCACUUUCUGUUU	hsa-miR-520g-5p,UCUAGAG[G/A]AAGCACUUUCUGUUU	321	432	116	31.1504
1431	hsa-miR-520g-5p	chr19	+	hsa-mir-520g	Yes (53666691-53762418:46:HHC:hsa-mir-512-1/hsa-mir-512-2/hsa-mir-1323/hsa-mir-498/hsa-mir-520e/hsa-mir-515-1/hsa-mir-519e/hsa-mir-520f/hsa-mir-515-2/hsa-mir-519c/hsa-mir-1283-1/hsa-mir-520a/hsa-mir-526b/hsa-mir-519b/hsa-mir-525/hsa-mir-523/hsa-mir-518f/hsa-mir-520b/hsa-mir-518b/hsa-mir-526a-1/hsa-mir-520c/hsa-mir-518c/hsa-mir-524/hsa-mir-517a/hsa-mir-519d/hsa-mir-521-2/hsa-mir-520d/hsa-mir-517b/…	3	rs182126774	53722183	C > G	1.6e-05	2	UCUAGAGGAAGCACUUUCUGUUU	UGUAGAGGAAGCACUUUCUGUUU	hsa-miR-520g-5p,U[C/G]UAGAGGAAGCACUUUCUGUUU	321	247	14	4.97195
1431	hsa-miR-520g-5p	chr19	+	hsa-mir-520g	Yes (53666691-53762418:46:HHC:hsa-mir-512-1/hsa-mir-512-2/hsa-mir-1323/hsa-mir-498/hsa-mir-520e/hsa-mir-515-1/hsa-mir-519e/hsa-mir-520f/hsa-mir-515-2/hsa-mir-519c/hsa-mir-1283-1/hsa-mir-520a/hsa-mir-526b/hsa-mir-519b/hsa-mir-525/hsa-mir-523/hsa-mir-518f/hsa-mir-520b/hsa-mir-518b/hsa-mir-526a-1/hsa-mir-520c/hsa-mir-518c/hsa-mir-524/hsa-mir-517a/hsa-mir-519d/hsa-mir-521-2/hsa-mir-520d/hsa-mir-517b/…	3	rs201667611	53722188	G > A	0.001	7	UCUAGAGGAAGCACUUUCUGUUU	UCUAGAAGAAGCACUUUCUGUUU	hsa-miR-520g-5p,UCUAGA[G/A]GAAGCACUUUCUGUUU	321	670	43	9.27211
1432	hsa-miR-516b-5p	chr19	+	hsa-mir-516b-2	Yes (53666691-53762418:46:HHC:hsa-mir-512-1/hsa-mir-512-2/hsa-mir-1323/hsa-mir-498/hsa-mir-520e/hsa-mir-515-1/hsa-mir-519e/hsa-mir-520f/hsa-mir-515-2/hsa-mir-519c/hsa-mir-1283-1/hsa-mir-520a/hsa-mir-526b/hsa-mir-519b/hsa-mir-525/hsa-mir-523/hsa-mir-518f/hsa-mir-520b/hsa-mir-518b/hsa-mir-526a-1/hsa-mir-520c/hsa-mir-518c/hsa-mir-524/hsa-mir-517a/hsa-mir-519d/hsa-mir-521-2/hsa-mir-520d/hsa-mir-517b/…	1	rs759747139	53725462	G > A	8e-06	6	AUCUGGAGGUAAGAAGCACUUU	AUCUGAAGGUAAGAAGCACUUU	hsa-miR-516b-5p,AUCUG[G/A]AGGUAAGAAGCACUUU	762	1313	173	17.2956
1433	hsa-miR-516b-3p	chr19	+	hsa-mir-516b-2	Yes (53666691-53762418:46:HHC:hsa-mir-512-1/hsa-mir-512-2/hsa-mir-1323/hsa-mir-498/hsa-mir-520e/hsa-mir-515-1/hsa-mir-519e/hsa-mir-520f/hsa-mir-515-2/hsa-mir-519c/hsa-mir-1283-1/hsa-mir-520a/hsa-mir-526b/hsa-mir-519b/hsa-mir-525/hsa-mir-523/hsa-mir-518f/hsa-mir-520b/hsa-mir-518b/hsa-mir-526a-1/hsa-mir-520c/hsa-mir-518c/hsa-mir-524/hsa-mir-517a/hsa-mir-519d/hsa-mir-521-2/hsa-mir-520d/hsa-mir-517b/…	1	rs752101959	53725499	C > T	3e-05	3	UGCUUCCUUUCAGAGGGU	UGUUUCCUUUCAGAGGGU	hsa-miR-516b-3p,UG[C/U]UUCCUUUCAGAGGGU	591	933	84	11.3121
1434	hsa-miR-526a	chr19	+	hsa-mir-526a-2	Yes (53666691-53762418:46:HHC:hsa-mir-512-1/hsa-mir-512-2/hsa-mir-1323/hsa-mir-498/hsa-mir-520e/hsa-mir-515-1/hsa-mir-519e/hsa-mir-520f/hsa-mir-515-2/hsa-mir-519c/hsa-mir-1283-1/hsa-mir-520a/hsa-mir-526b/hsa-mir-519b/hsa-mir-525/hsa-mir-523/hsa-mir-518f/hsa-mir-520b/hsa-mir-518b/hsa-mir-526a-1/hsa-mir-520c/hsa-mir-518c/hsa-mir-524/hsa-mir-517a/hsa-mir-519d/hsa-mir-521-2/hsa-mir-520d/hsa-mir-517b/…	1	rs745969133	53726935	G > C	8e-06	8	CUCUAGAGGGAAGCACUUUCUG	CUCUAGACGGAAGCACUUUCUG	hsa-miR-526a,CUCUAGA[G/C]GGAAGCACUUUCUG	539	474	267	52.8236
1435	hsa-miR-518e-5p	chr19	+	hsa-mir-518e	Yes (53666691-53762418:46:HHC:hsa-mir-512-1/hsa-mir-512-2/hsa-mir-1323/hsa-mir-498/hsa-mir-520e/hsa-mir-515-1/hsa-mir-519e/hsa-mir-520f/hsa-mir-515-2/hsa-mir-519c/hsa-mir-1283-1/hsa-mir-520a/hsa-mir-526b/hsa-mir-519b/hsa-mir-525/hsa-mir-523/hsa-mir-518f/hsa-mir-520b/hsa-mir-518b/hsa-mir-526a-1/hsa-mir-520c/hsa-mir-518c/hsa-mir-524/hsa-mir-517a/hsa-mir-519d/hsa-mir-521-2/hsa-mir-520d/hsa-mir-517b/…	0
1436	hsa-miR-518e-3p	chr19	+	hsa-mir-518e	Yes (53666691-53762418:46:HHC:hsa-mir-512-1/hsa-mir-512-2/hsa-mir-1323/hsa-mir-498/hsa-mir-520e/hsa-mir-515-1/hsa-mir-519e/hsa-mir-520f/hsa-mir-515-2/hsa-mir-519c/hsa-mir-1283-1/hsa-mir-520a/hsa-mir-526b/hsa-mir-519b/hsa-mir-525/hsa-mir-523/hsa-mir-518f/hsa-mir-520b/hsa-mir-518b/hsa-mir-526a-1/hsa-mir-520c/hsa-mir-518c/hsa-mir-524/hsa-mir-517a/hsa-mir-519d/hsa-mir-521-2/hsa-mir-520d/hsa-mir-517b/…	1	rs758672750	53729896	G > A	2.5e-05	6	AAAGCGCUUCCCUUCAGAGUG	AAAGCACUUCCCUUCAGAGUG	hsa-miR-518e-3p,AAAGC[G/A]CUUCCCUUCAGAGUG	23	649	3	2.45547
1437	hsa-miR-518a-5p	chr19	+	hsa-mir-518a-1	Yes (53666691-53762418:46:HHC:hsa-mir-512-1/hsa-mir-512-2/hsa-mir-1323/hsa-mir-498/hsa-mir-520e/hsa-mir-515-1/hsa-mir-519e/hsa-mir-520f/hsa-mir-515-2/hsa-mir-519c/hsa-mir-1283-1/hsa-mir-520a/hsa-mir-526b/hsa-mir-519b/hsa-mir-525/hsa-mir-523/hsa-mir-518f/hsa-mir-520b/hsa-mir-518b/hsa-mir-526a-1/hsa-mir-520c/hsa-mir-518c/hsa-mir-524/hsa-mir-517a/hsa-mir-519d/hsa-mir-521-2/hsa-mir-520d/hsa-mir-517b/…	0
1438	hsa-miR-518a-3p	chr19	+	hsa-mir-518a-1	Yes (53666691-53762418:46:HHC:hsa-mir-512-1/hsa-mir-512-2/hsa-mir-1323/hsa-mir-498/hsa-mir-520e/hsa-mir-515-1/hsa-mir-519e/hsa-mir-520f/hsa-mir-515-2/hsa-mir-519c/hsa-mir-1283-1/hsa-mir-520a/hsa-mir-526b/hsa-mir-519b/hsa-mir-525/hsa-mir-523/hsa-mir-518f/hsa-mir-520b/hsa-mir-518b/hsa-mir-526a-1/hsa-mir-520c/hsa-mir-518c/hsa-mir-524/hsa-mir-517a/hsa-mir-519d/hsa-mir-521-2/hsa-mir-520d/hsa-mir-517b/…	3	rs747723702	53731063	C > T	8e-06	8	GAAAGCGCUUCCCUUUGCUGGA	GAAAGCGUUUCCCUUUGCUGGA	hsa-miR-518a-3p,GAAAGCG[C/U]UUCCCUUUGCUGGA	64	68	6	9.09509
1438	hsa-miR-518a-3p	chr19	+	hsa-mir-518a-1	Yes (53666691-53762418:46:HHC:hsa-mir-512-1/hsa-mir-512-2/hsa-mir-1323/hsa-mir-498/hsa-mir-520e/hsa-mir-515-1/hsa-mir-519e/hsa-mir-520f/hsa-mir-515-2/hsa-mir-519c/hsa-mir-1283-1/hsa-mir-520a/hsa-mir-526b/hsa-mir-519b/hsa-mir-525/hsa-mir-523/hsa-mir-518f/hsa-mir-520b/hsa-mir-518b/hsa-mir-526a-1/hsa-mir-520c/hsa-mir-518c/hsa-mir-524/hsa-mir-517a/hsa-mir-519d/hsa-mir-521-2/hsa-mir-520d/hsa-mir-517b/…	3	rs768061655	53731058	A > T	1.7e-05	3	GAAAGCGCUUCCCUUUGCUGGA	GAUAGCGCUUCCCUUUGCUGGA	hsa-miR-518a-3p,GA[A/U]AGCGCUUCCCUUUGCUGGA	64	20	0	0
1438	hsa-miR-518a-3p	chr19	+	hsa-mir-518a-1	Yes (53666691-53762418:46:HHC:hsa-mir-512-1/hsa-mir-512-2/hsa-mir-1323/hsa-mir-498/hsa-mir-520e/hsa-mir-515-1/hsa-mir-519e/hsa-mir-520f/hsa-mir-515-2/hsa-mir-519c/hsa-mir-1283-1/hsa-mir-520a/hsa-mir-526b/hsa-mir-519b/hsa-mir-525/hsa-mir-523/hsa-mir-518f/hsa-mir-520b/hsa-mir-518b/hsa-mir-526a-1/hsa-mir-520c/hsa-mir-518c/hsa-mir-524/hsa-mir-517a/hsa-mir-519d/hsa-mir-521-2/hsa-mir-520d/hsa-mir-517b/…	3	rs200532946	53731062	G > A	8e-06	7	GAAAGCGCUUCCCUUUGCUGGA	GAAAGCACUUCCCUUUGCUGGA	hsa-miR-518a-3p,GAAAGC[G/A]CUUCCCUUUGCUGGA	64	1668	22	6.7334
1439	hsa-miR-518d-5p	chr19	+	hsa-mir-518d	Yes (53666691-53762418:46:HHC:hsa-mir-512-1/hsa-mir-512-2/hsa-mir-1323/hsa-mir-498/hsa-mir-520e/hsa-mir-515-1/hsa-mir-519e/hsa-mir-520f/hsa-mir-515-2/hsa-mir-519c/hsa-mir-1283-1/hsa-mir-520a/hsa-mir-526b/hsa-mir-519b/hsa-mir-525/hsa-mir-523/hsa-mir-518f/hsa-mir-520b/hsa-mir-518b/hsa-mir-526a-1/hsa-mir-520c/hsa-mir-518c/hsa-mir-524/hsa-mir-517a/hsa-mir-519d/hsa-mir-521-2/hsa-mir-520d/hsa-mir-517b/…	0
1440	hsa-miR-518d-3p	chr19	+	hsa-mir-518d	Yes (53666691-53762418:46:HHC:hsa-mir-512-1/hsa-mir-512-2/hsa-mir-1323/hsa-mir-498/hsa-mir-520e/hsa-mir-515-1/hsa-mir-519e/hsa-mir-520f/hsa-mir-515-2/hsa-mir-519c/hsa-mir-1283-1/hsa-mir-520a/hsa-mir-526b/hsa-mir-519b/hsa-mir-525/hsa-mir-523/hsa-mir-518f/hsa-mir-520b/hsa-mir-518b/hsa-mir-526a-1/hsa-mir-520c/hsa-mir-518c/hsa-mir-524/hsa-mir-517a/hsa-mir-519d/hsa-mir-521-2/hsa-mir-520d/hsa-mir-517b/…	3	rs768503953	53734934	C > T	8e-06	6	CAAAGCGCUUCCCUUUGGAGC	CAAAGUGCUUCCCUUUGGAGC	hsa-miR-518d-3p,CAAAG[C/U]GCUUCCCUUUGGAGC	64	1304	14	4.84618
1440	hsa-miR-518d-3p	chr19	+	hsa-mir-518d	Yes (53666691-53762418:46:HHC:hsa-mir-512-1/hsa-mir-512-2/hsa-mir-1323/hsa-mir-498/hsa-mir-520e/hsa-mir-515-1/hsa-mir-519e/hsa-mir-520f/hsa-mir-515-2/hsa-mir-519c/hsa-mir-1283-1/hsa-mir-520a/hsa-mir-526b/hsa-mir-519b/hsa-mir-525/hsa-mir-523/hsa-mir-518f/hsa-mir-520b/hsa-mir-518b/hsa-mir-526a-1/hsa-mir-520c/hsa-mir-518c/hsa-mir-524/hsa-mir-517a/hsa-mir-519d/hsa-mir-521-2/hsa-mir-520d/hsa-mir-517b/…	3	rs73602910	53734935	G > A	0.001001	7	CAAAGCGCUUCCCUUUGGAGC	CAAAGCACUUCCCUUUGGAGC	hsa-miR-518d-3p,CAAAGC[G/A]CUUCCCUUUGGAGC	64	1668	22	6.7334
1440	hsa-miR-518d-3p	chr19	+	hsa-mir-518d	Yes (53666691-53762418:46:HHC:hsa-mir-512-1/hsa-mir-512-2/hsa-mir-1323/hsa-mir-498/hsa-mir-520e/hsa-mir-515-1/hsa-mir-519e/hsa-mir-520f/hsa-mir-515-2/hsa-mir-519c/hsa-mir-1283-1/hsa-mir-520a/hsa-mir-526b/hsa-mir-519b/hsa-mir-525/hsa-mir-523/hsa-mir-518f/hsa-mir-520b/hsa-mir-518b/hsa-mir-526a-1/hsa-mir-520c/hsa-mir-518c/hsa-mir-524/hsa-mir-517a/hsa-mir-519d/hsa-mir-521-2/hsa-mir-520d/hsa-mir-517b/…	3	rs373234901	53734936	C > T	2.5e-05	8	CAAAGCGCUUCCCUUUGGAGC	CAAAGCGUUUCCCUUUGGAGC	hsa-miR-518d-3p,CAAAGCG[C/U]UUCCCUUUGGAGC	64	68	6	9.09509
1441	hsa-miR-516b-5p	chr19	+	hsa-mir-516b-1	Yes (53666691-53762418:46:HHC:hsa-mir-512-1/hsa-mir-512-2/hsa-mir-1323/hsa-mir-498/hsa-mir-520e/hsa-mir-515-1/hsa-mir-519e/hsa-mir-520f/hsa-mir-515-2/hsa-mir-519c/hsa-mir-1283-1/hsa-mir-520a/hsa-mir-526b/hsa-mir-519b/hsa-mir-525/hsa-mir-523/hsa-mir-518f/hsa-mir-520b/hsa-mir-518b/hsa-mir-526a-1/hsa-mir-520c/hsa-mir-518c/hsa-mir-524/hsa-mir-517a/hsa-mir-519d/hsa-mir-521-2/hsa-mir-520d/hsa-mir-517b/…	1	rs754712551	53736862	C > T	8e-06	3	AUCUGGAGGUAAGAAGCACUUU	AUUUGGAGGUAAGAAGCACUUU	hsa-miR-516b-5p,AU[C/U]UGGAGGUAAGAAGCACUUU	762	915	137	16.4071
1442	hsa-miR-516b-3p	chr19	+	hsa-mir-516b-1	Yes (53666691-53762418:46:HHC:hsa-mir-512-1/hsa-mir-512-2/hsa-mir-1323/hsa-mir-498/hsa-mir-520e/hsa-mir-515-1/hsa-mir-519e/hsa-mir-520f/hsa-mir-515-2/hsa-mir-519c/hsa-mir-1283-1/hsa-mir-520a/hsa-mir-526b/hsa-mir-519b/hsa-mir-525/hsa-mir-523/hsa-mir-518f/hsa-mir-520b/hsa-mir-518b/hsa-mir-526a-1/hsa-mir-520c/hsa-mir-518c/hsa-mir-524/hsa-mir-517a/hsa-mir-519d/hsa-mir-521-2/hsa-mir-520d/hsa-mir-517b/…	2	rs770077784	53736908	T > C	8e-06	4	UGCUUCCUUUCAGAGGGU	UGCCUCCUUUCAGAGGGU	hsa-miR-516b-3p,UGC[U/C]UCCUUUCAGAGGGU	591	581	62	10.5806
1442	hsa-miR-516b-3p	chr19	+	hsa-mir-516b-1	Yes (53666691-53762418:46:HHC:hsa-mir-512-1/hsa-mir-512-2/hsa-mir-1323/hsa-mir-498/hsa-mir-520e/hsa-mir-515-1/hsa-mir-519e/hsa-mir-520f/hsa-mir-515-2/hsa-mir-519c/hsa-mir-1283-1/hsa-mir-520a/hsa-mir-526b/hsa-mir-519b/hsa-mir-525/hsa-mir-523/hsa-mir-518f/hsa-mir-520b/hsa-mir-518b/hsa-mir-526a-1/hsa-mir-520c/hsa-mir-518c/hsa-mir-524/hsa-mir-517a/hsa-mir-519d/hsa-mir-521-2/hsa-mir-520d/hsa-mir-517b/…	2	rs746170707	53736906	G > T	1.7e-05	2	UGCUUCCUUUCAGAGGGU	UUCUUCCUUUCAGAGGGU	hsa-miR-516b-3p,U[G/U]CUUCCUUUCAGAGGGU	591	1235	121	14.1631
1443	hsa-miR-518a-5p	chr19	+	hsa-mir-518a-2	Yes (53666691-53762418:46:HHC:hsa-mir-512-1/hsa-mir-512-2/hsa-mir-1323/hsa-mir-498/hsa-mir-520e/hsa-mir-515-1/hsa-mir-519e/hsa-mir-520f/hsa-mir-515-2/hsa-mir-519c/hsa-mir-1283-1/hsa-mir-520a/hsa-mir-526b/hsa-mir-519b/hsa-mir-525/hsa-mir-523/hsa-mir-518f/hsa-mir-520b/hsa-mir-518b/hsa-mir-526a-1/hsa-mir-520c/hsa-mir-518c/hsa-mir-524/hsa-mir-517a/hsa-mir-519d/hsa-mir-521-2/hsa-mir-520d/hsa-mir-517b/…	1	rs748541083	53739350	G > A	2.5e-05	3	CUGCAAAGGGAAGCCCUUUC	CUACAAAGGGAAGCCCUUUC	hsa-miR-518a-5p,CU[G/A]CAAAGGGAAGCCCUUUC	1258	2503	595	33.531
1444	hsa-miR-518a-3p	chr19	+	hsa-mir-518a-2	Yes (53666691-53762418:46:HHC:hsa-mir-512-1/hsa-mir-512-2/hsa-mir-1323/hsa-mir-498/hsa-mir-520e/hsa-mir-515-1/hsa-mir-519e/hsa-mir-520f/hsa-mir-515-2/hsa-mir-519c/hsa-mir-1283-1/hsa-mir-520a/hsa-mir-526b/hsa-mir-519b/hsa-mir-525/hsa-mir-523/hsa-mir-518f/hsa-mir-520b/hsa-mir-518b/hsa-mir-526a-1/hsa-mir-520c/hsa-mir-518c/hsa-mir-524/hsa-mir-517a/hsa-mir-519d/hsa-mir-521-2/hsa-mir-520d/hsa-mir-517b/…	3	rs761619523	53739392	C > T	1.7e-05	8	GAAAGCGCUUCCCUUUGCUGGA	GAAAGCGUUUCCCUUUGCUGGA	hsa-miR-518a-3p,GAAAGCG[C/U]UUCCCUUUGCUGGA	64	68	6	9.09509
1444	hsa-miR-518a-3p	chr19	+	hsa-mir-518a-2	Yes (53666691-53762418:46:HHC:hsa-mir-512-1/hsa-mir-512-2/hsa-mir-1323/hsa-mir-498/hsa-mir-520e/hsa-mir-515-1/hsa-mir-519e/hsa-mir-520f/hsa-mir-515-2/hsa-mir-519c/hsa-mir-1283-1/hsa-mir-520a/hsa-mir-526b/hsa-mir-519b/hsa-mir-525/hsa-mir-523/hsa-mir-518f/hsa-mir-520b/hsa-mir-518b/hsa-mir-526a-1/hsa-mir-520c/hsa-mir-518c/hsa-mir-524/hsa-mir-517a/hsa-mir-519d/hsa-mir-521-2/hsa-mir-520d/hsa-mir-517b/…	3	rs199969520	53739391	G > A	0.000141	7	GAAAGCGCUUCCCUUUGCUGGA	GAAAGCACUUCCCUUUGCUGGA	hsa-miR-518a-3p,GAAAGC[G/A]CUUCCCUUUGCUGGA	64	1668	22	6.7334
1444	hsa-miR-518a-3p	chr19	+	hsa-mir-518a-2	Yes (53666691-53762418:46:HHC:hsa-mir-512-1/hsa-mir-512-2/hsa-mir-1323/hsa-mir-498/hsa-mir-520e/hsa-mir-515-1/hsa-mir-519e/hsa-mir-520f/hsa-mir-515-2/hsa-mir-519c/hsa-mir-1283-1/hsa-mir-520a/hsa-mir-526b/hsa-mir-519b/hsa-mir-525/hsa-mir-523/hsa-mir-518f/hsa-mir-520b/hsa-mir-518b/hsa-mir-526a-1/hsa-mir-520c/hsa-mir-518c/hsa-mir-524/hsa-mir-517a/hsa-mir-519d/hsa-mir-521-2/hsa-mir-520d/hsa-mir-517b/…	3	rs768279096	53739390	C > T	8e-06	6	GAAAGCGCUUCCCUUUGCUGGA	GAAAGUGCUUCCCUUUGCUGGA	hsa-miR-518a-3p,GAAAG[C/U]GCUUCCCUUUGCUGGA	64	1304	14	4.84618
1445	hsa-miR-517-5p	chr19	+	hsa-mir-517c	Yes (53666691-53762418:46:HHC:hsa-mir-512-1/hsa-mir-512-2/hsa-mir-1323/hsa-mir-498/hsa-mir-520e/hsa-mir-515-1/hsa-mir-519e/hsa-mir-520f/hsa-mir-515-2/hsa-mir-519c/hsa-mir-1283-1/hsa-mir-520a/hsa-mir-526b/hsa-mir-519b/hsa-mir-525/hsa-mir-523/hsa-mir-518f/hsa-mir-520b/hsa-mir-518b/hsa-mir-526a-1/hsa-mir-520c/hsa-mir-518c/hsa-mir-524/hsa-mir-517a/hsa-mir-519d/hsa-mir-521-2/hsa-mir-520d/hsa-mir-517b/…	2	rs776709891	53741333	C > T	1.7e-05	2	CCUCUAGAUGGAAGCACUGUCU	CUUCUAGAUGGAAGCACUGUCU	hsa-miR-517-5p,C[C/U]UCUAGAUGGAAGCACUGUCU	433	923	81	12.8127
1445	hsa-miR-517-5p	chr19	+	hsa-mir-517c	Yes (53666691-53762418:46:HHC:hsa-mir-512-1/hsa-mir-512-2/hsa-mir-1323/hsa-mir-498/hsa-mir-520e/hsa-mir-515-1/hsa-mir-519e/hsa-mir-520f/hsa-mir-515-2/hsa-mir-519c/hsa-mir-1283-1/hsa-mir-520a/hsa-mir-526b/hsa-mir-519b/hsa-mir-525/hsa-mir-523/hsa-mir-518f/hsa-mir-520b/hsa-mir-518b/hsa-mir-526a-1/hsa-mir-520c/hsa-mir-518c/hsa-mir-524/hsa-mir-517a/hsa-mir-519d/hsa-mir-521-2/hsa-mir-520d/hsa-mir-517b/…	2	rs759633354	53741337	A > G	8e-06	6	CCUCUAGAUGGAAGCACUGUCU	CCUCUGGAUGGAAGCACUGUCU	hsa-miR-517-5p,CCUCU[A/G]GAUGGAAGCACUGUCU	433	836	59	9.80629
1446	hsa-miR-517c-3p	chr19	+	hsa-mir-517c	Yes (53666691-53762418:46:HHC:hsa-mir-512-1/hsa-mir-512-2/hsa-mir-1323/hsa-mir-498/hsa-mir-520e/hsa-mir-515-1/hsa-mir-519e/hsa-mir-520f/hsa-mir-515-2/hsa-mir-519c/hsa-mir-1283-1/hsa-mir-520a/hsa-mir-526b/hsa-mir-519b/hsa-mir-525/hsa-mir-523/hsa-mir-518f/hsa-mir-520b/hsa-mir-518b/hsa-mir-526a-1/hsa-mir-520c/hsa-mir-518c/hsa-mir-524/hsa-mir-517a/hsa-mir-519d/hsa-mir-521-2/hsa-mir-520d/hsa-mir-517b/…	3	rs757862473	53741376	A > G	8e-06	8	AUCGUGCAUCCUUUUAGAGUGU	AUCGUGCGUCCUUUUAGAGUGU	hsa-miR-517c-3p,AUCGUGC[A/G]UCCUUUUAGAGUGU	41	8	3	16.5647
1446	hsa-miR-517c-3p	chr19	+	hsa-mir-517c	Yes (53666691-53762418:46:HHC:hsa-mir-512-1/hsa-mir-512-2/hsa-mir-1323/hsa-mir-498/hsa-mir-520e/hsa-mir-515-1/hsa-mir-519e/hsa-mir-520f/hsa-mir-515-2/hsa-mir-519c/hsa-mir-1283-1/hsa-mir-520a/hsa-mir-526b/hsa-mir-519b/hsa-mir-525/hsa-mir-523/hsa-mir-518f/hsa-mir-520b/hsa-mir-518b/hsa-mir-526a-1/hsa-mir-520c/hsa-mir-518c/hsa-mir-524/hsa-mir-517a/hsa-mir-519d/hsa-mir-521-2/hsa-mir-520d/hsa-mir-517b/…	3	rs764618172	53741372	G > A	1.7e-05	4	AUCGUGCAUCCUUUUAGAGUGU	AUCAUGCAUCCUUUUAGAGUGU	hsa-miR-517c-3p,AUC[G/A]UGCAUCCUUUUAGAGUGU	41	577	4	2.60064
1446	hsa-miR-517c-3p	chr19	+	hsa-mir-517c	Yes (53666691-53762418:46:HHC:hsa-mir-512-1/hsa-mir-512-2/hsa-mir-1323/hsa-mir-498/hsa-mir-520e/hsa-mir-515-1/hsa-mir-519e/hsa-mir-520f/hsa-mir-515-2/hsa-mir-519c/hsa-mir-1283-1/hsa-mir-520a/hsa-mir-526b/hsa-mir-519b/hsa-mir-525/hsa-mir-523/hsa-mir-518f/hsa-mir-520b/hsa-mir-518b/hsa-mir-526a-1/hsa-mir-520c/hsa-mir-518c/hsa-mir-524/hsa-mir-517a/hsa-mir-519d/hsa-mir-521-2/hsa-mir-520d/hsa-mir-517b/…	3	rs752057534	53741374	G > A	8e-06	6	AUCGUGCAUCCUUUUAGAGUGU	AUCGUACAUCCUUUUAGAGUGU	hsa-miR-517c-3p,AUCGU[G/A]CAUCCUUUUAGAGUGU	41	62	0	0
1447	hsa-miR-520h	chr19	+	hsa-mir-520h	Yes (53666691-53762418:46:HHC:hsa-mir-512-1/hsa-mir-512-2/hsa-mir-1323/hsa-mir-498/hsa-mir-520e/hsa-mir-515-1/hsa-mir-519e/hsa-mir-520f/hsa-mir-515-2/hsa-mir-519c/hsa-mir-1283-1/hsa-mir-520a/hsa-mir-526b/hsa-mir-519b/hsa-mir-525/hsa-mir-523/hsa-mir-518f/hsa-mir-520b/hsa-mir-518b/hsa-mir-526a-1/hsa-mir-520c/hsa-mir-518c/hsa-mir-524/hsa-mir-517a/hsa-mir-519d/hsa-mir-521-2/hsa-mir-520d/hsa-mir-517b/…	0
1448	hsa-miR-521	chr19	+	hsa-mir-521-1	Yes (53666691-53762418:46:HHC:hsa-mir-512-1/hsa-mir-512-2/hsa-mir-1323/hsa-mir-498/hsa-mir-520e/hsa-mir-515-1/hsa-mir-519e/hsa-mir-520f/hsa-mir-515-2/hsa-mir-519c/hsa-mir-1283-1/hsa-mir-520a/hsa-mir-526b/hsa-mir-519b/hsa-mir-525/hsa-mir-523/hsa-mir-518f/hsa-mir-520b/hsa-mir-518b/hsa-mir-526a-1/hsa-mir-520c/hsa-mir-518c/hsa-mir-524/hsa-mir-517a/hsa-mir-519d/hsa-mir-521-2/hsa-mir-520d/hsa-mir-517b/…	2	rs375560385	53748696	T > C	8e-06	8	AACGCACUUCCCUUUAGAGUGU	AACGCACCUCCCUUUAGAGUGU	hsa-miR-521,AACGCAC[U/C]UCCCUUUAGAGUGU	49	37	14	32.8798
1448	hsa-miR-521	chr19	+	hsa-mir-521-1	Yes (53666691-53762418:46:HHC:hsa-mir-512-1/hsa-mir-512-2/hsa-mir-1323/hsa-mir-498/hsa-mir-520e/hsa-mir-515-1/hsa-mir-519e/hsa-mir-520f/hsa-mir-515-2/hsa-mir-519c/hsa-mir-1283-1/hsa-mir-520a/hsa-mir-526b/hsa-mir-519b/hsa-mir-525/hsa-mir-523/hsa-mir-518f/hsa-mir-520b/hsa-mir-518b/hsa-mir-526a-1/hsa-mir-520c/hsa-mir-518c/hsa-mir-524/hsa-mir-517a/hsa-mir-519d/hsa-mir-521-2/hsa-mir-520d/hsa-mir-517b/…	2	rs754991754	53748692	G > A	1.7e-05	4	AACGCACUUCCCUUUAGAGUGU	AACACACUUCCCUUUAGAGUGU	hsa-miR-521,AAC[G/A]CACUUCCCUUUAGAGUGU	49	1436	18	6.78574
1449	hsa-miR-522-5p	chr19	+	hsa-mir-522	Yes (53666691-53762418:46:HHC:hsa-mir-512-1/hsa-mir-512-2/hsa-mir-1323/hsa-mir-498/hsa-mir-520e/hsa-mir-515-1/hsa-mir-519e/hsa-mir-520f/hsa-mir-515-2/hsa-mir-519c/hsa-mir-1283-1/hsa-mir-520a/hsa-mir-526b/hsa-mir-519b/hsa-mir-525/hsa-mir-523/hsa-mir-518f/hsa-mir-520b/hsa-mir-518b/hsa-mir-526a-1/hsa-mir-520c/hsa-mir-518c/hsa-mir-524/hsa-mir-517a/hsa-mir-519d/hsa-mir-521-2/hsa-mir-520d/hsa-mir-517b/…	0
1450	hsa-miR-522-3p	chr19	+	hsa-mir-522	Yes (53666691-53762418:46:HHC:hsa-mir-512-1/hsa-mir-512-2/hsa-mir-1323/hsa-mir-498/hsa-mir-520e/hsa-mir-515-1/hsa-mir-519e/hsa-mir-520f/hsa-mir-515-2/hsa-mir-519c/hsa-mir-1283-1/hsa-mir-520a/hsa-mir-526b/hsa-mir-519b/hsa-mir-525/hsa-mir-523/hsa-mir-518f/hsa-mir-520b/hsa-mir-518b/hsa-mir-526a-1/hsa-mir-520c/hsa-mir-518c/hsa-mir-524/hsa-mir-517a/hsa-mir-519d/hsa-mir-521-2/hsa-mir-520d/hsa-mir-517b/…	0
1451	hsa-miR-519a-5p	chr19	+	hsa-mir-519a-1	Yes (53666691-53762418:46:HHC:hsa-mir-512-1/hsa-mir-512-2/hsa-mir-1323/hsa-mir-498/hsa-mir-520e/hsa-mir-515-1/hsa-mir-519e/hsa-mir-520f/hsa-mir-515-2/hsa-mir-519c/hsa-mir-1283-1/hsa-mir-520a/hsa-mir-526b/hsa-mir-519b/hsa-mir-525/hsa-mir-523/hsa-mir-518f/hsa-mir-520b/hsa-mir-518b/hsa-mir-526a-1/hsa-mir-520c/hsa-mir-518c/hsa-mir-524/hsa-mir-517a/hsa-mir-519d/hsa-mir-521-2/hsa-mir-520d/hsa-mir-517b/…	2	rs367544158	53752418	G > A	8e-06	8	CUCUAGAGGGAAGCGCUUUCUG	CUCUAGAAGGAAGCGCUUUCUG	hsa-miR-519a-5p,CUCUAGA[G/A]GGAAGCGCUUUCUG	539	893	291	41.9443
1451	hsa-miR-519a-5p	chr19	+	hsa-mir-519a-1	Yes (53666691-53762418:46:HHC:hsa-mir-512-1/hsa-mir-512-2/hsa-mir-1323/hsa-mir-498/hsa-mir-520e/hsa-mir-515-1/hsa-mir-519e/hsa-mir-520f/hsa-mir-515-2/hsa-mir-519c/hsa-mir-1283-1/hsa-mir-520a/hsa-mir-526b/hsa-mir-519b/hsa-mir-525/hsa-mir-523/hsa-mir-518f/hsa-mir-520b/hsa-mir-518b/hsa-mir-526a-1/hsa-mir-520c/hsa-mir-518c/hsa-mir-524/hsa-mir-517a/hsa-mir-519d/hsa-mir-521-2/hsa-mir-520d/hsa-mir-517b/…	2	rs768403810	53752417	A > G	8e-06	7	CUCUAGAGGGAAGCGCUUUCUG	CUCUAGGGGGAAGCGCUUUCUG	hsa-miR-519a-5p,CUCUAG[A/G]GGGAAGCGCUUUCUG	539	331	42	9.94354
1452	hsa-miR-519a-3p	chr19	+	hsa-mir-519a-1	Yes (53666691-53762418:46:HHC:hsa-mir-512-1/hsa-mir-512-2/hsa-mir-1323/hsa-mir-498/hsa-mir-520e/hsa-mir-515-1/hsa-mir-519e/hsa-mir-520f/hsa-mir-515-2/hsa-mir-519c/hsa-mir-1283-1/hsa-mir-520a/hsa-mir-526b/hsa-mir-519b/hsa-mir-525/hsa-mir-523/hsa-mir-518f/hsa-mir-520b/hsa-mir-518b/hsa-mir-526a-1/hsa-mir-520c/hsa-mir-518c/hsa-mir-524/hsa-mir-517a/hsa-mir-519d/hsa-mir-521-2/hsa-mir-520d/hsa-mir-517b/…	0
1453	hsa-miR-527	chr19	+	hsa-mir-527	Yes (53666691-53762418:46:HHC:hsa-mir-512-1/hsa-mir-512-2/hsa-mir-1323/hsa-mir-498/hsa-mir-520e/hsa-mir-515-1/hsa-mir-519e/hsa-mir-520f/hsa-mir-515-2/hsa-mir-519c/hsa-mir-1283-1/hsa-mir-520a/hsa-mir-526b/hsa-mir-519b/hsa-mir-525/hsa-mir-523/hsa-mir-518f/hsa-mir-520b/hsa-mir-518b/hsa-mir-526a-1/hsa-mir-520c/hsa-mir-518c/hsa-mir-524/hsa-mir-517a/hsa-mir-519d/hsa-mir-521-2/hsa-mir-520d/hsa-mir-517b/…	2	rs755585957	53754033	G > A	2.5e-05	3	CUGCAAAGGGAAGCCCUUUC	CUACAAAGGGAAGCCCUUUC	hsa-miR-527,CU[G/A]CAAAGGGAAGCCCUUUC	1258	2503	595	33.531
1453	hsa-miR-527	chr19	+	hsa-mir-527	Yes (53666691-53762418:46:HHC:hsa-mir-512-1/hsa-mir-512-2/hsa-mir-1323/hsa-mir-498/hsa-mir-520e/hsa-mir-515-1/hsa-mir-519e/hsa-mir-520f/hsa-mir-515-2/hsa-mir-519c/hsa-mir-1283-1/hsa-mir-520a/hsa-mir-526b/hsa-mir-519b/hsa-mir-525/hsa-mir-523/hsa-mir-518f/hsa-mir-520b/hsa-mir-518b/hsa-mir-526a-1/hsa-mir-520c/hsa-mir-518c/hsa-mir-524/hsa-mir-517a/hsa-mir-519d/hsa-mir-521-2/hsa-mir-520d/hsa-mir-517b/…	2	rs377171698	53754038	G > A	2.5e-05	8	CUGCAAAGGGAAGCCCUUUC	CUGCAAAAGGAAGCCCUUUC	hsa-miR-527,CUGCAAA[G/A]GGAAGCCCUUUC	1258	1691	834	57.1813
1454	hsa-miR-516a-5p	chr19	+	hsa-mir-516a-1	Yes (53666691-53762418:46:HHC:hsa-mir-512-1/hsa-mir-512-2/hsa-mir-1323/hsa-mir-498/hsa-mir-520e/hsa-mir-515-1/hsa-mir-519e/hsa-mir-520f/hsa-mir-515-2/hsa-mir-519c/hsa-mir-1283-1/hsa-mir-520a/hsa-mir-526b/hsa-mir-519b/hsa-mir-525/hsa-mir-523/hsa-mir-518f/hsa-mir-520b/hsa-mir-518b/hsa-mir-526a-1/hsa-mir-520c/hsa-mir-518c/hsa-mir-524/hsa-mir-517a/hsa-mir-519d/hsa-mir-521-2/hsa-mir-520d/hsa-mir-517b/…	2	rs768970894	53756758	C > T	1.7e-05	3	UUCUCGAGGAAAGAAGCACUUUC	UUUUCGAGGAAAGAAGCACUUUC	hsa-miR-516a-5p,UU[C/U]UCGAGGAAAGAAGCACUUUC	33	65	0	0
1454	hsa-miR-516a-5p	chr19	+	hsa-mir-516a-1	Yes (53666691-53762418:46:HHC:hsa-mir-512-1/hsa-mir-512-2/hsa-mir-1323/hsa-mir-498/hsa-mir-520e/hsa-mir-515-1/hsa-mir-519e/hsa-mir-520f/hsa-mir-515-2/hsa-mir-519c/hsa-mir-1283-1/hsa-mir-520a/hsa-mir-526b/hsa-mir-519b/hsa-mir-525/hsa-mir-523/hsa-mir-518f/hsa-mir-520b/hsa-mir-518b/hsa-mir-526a-1/hsa-mir-520c/hsa-mir-518c/hsa-mir-524/hsa-mir-517a/hsa-mir-519d/hsa-mir-521-2/hsa-mir-520d/hsa-mir-517b/…	2	rs774686706	53756761	G > A	4.1e-05	6	UUCUCGAGGAAAGAAGCACUUUC	UUCUCAAGGAAAGAAGCACUUUC	hsa-miR-516a-5p,UUCUC[G/A]AGGAAAGAAGCACUUUC	33	955	5	2.81651
1455	hsa-miR-516a-3p	chr19	+	hsa-mir-516a-1	Yes (53666691-53762418:46:HHC:hsa-mir-512-1/hsa-mir-512-2/hsa-mir-1323/hsa-mir-498/hsa-mir-520e/hsa-mir-515-1/hsa-mir-519e/hsa-mir-520f/hsa-mir-515-2/hsa-mir-519c/hsa-mir-1283-1/hsa-mir-520a/hsa-mir-526b/hsa-mir-519b/hsa-mir-525/hsa-mir-523/hsa-mir-518f/hsa-mir-520b/hsa-mir-518b/hsa-mir-526a-1/hsa-mir-520c/hsa-mir-518c/hsa-mir-524/hsa-mir-517a/hsa-mir-519d/hsa-mir-521-2/hsa-mir-520d/hsa-mir-517b/…	0
1456	hsa-miR-1283	chr19	+	hsa-mir-1283-2	Yes (53666691-53762418:46:HHC:hsa-mir-512-1/hsa-mir-512-2/hsa-mir-1323/hsa-mir-498/hsa-mir-520e/hsa-mir-515-1/hsa-mir-519e/hsa-mir-520f/hsa-mir-515-2/hsa-mir-519c/hsa-mir-1283-1/hsa-mir-520a/hsa-mir-526b/hsa-mir-519b/hsa-mir-525/hsa-mir-523/hsa-mir-518f/hsa-mir-520b/hsa-mir-518b/hsa-mir-526a-1/hsa-mir-520c/hsa-mir-518c/hsa-mir-524/hsa-mir-517a/hsa-mir-519d/hsa-mir-521-2/hsa-mir-520d/hsa-mir-517b/…	4	rs768001492	53758246	C > G	9.1e-05	2	UCUACAAAGGAAAGCGCUUUCU	UGUACAAAGGAAAGCGCUUUCU	hsa-miR-1283,U[C/G]UACAAAGGAAAGCGCUUUCU	1090	1406	243	19.6291
1456	hsa-miR-1283	chr19	+	hsa-mir-1283-2	Yes (53666691-53762418:46:HHC:hsa-mir-512-1/hsa-mir-512-2/hsa-mir-1323/hsa-mir-498/hsa-mir-520e/hsa-mir-515-1/hsa-mir-519e/hsa-mir-520f/hsa-mir-515-2/hsa-mir-519c/hsa-mir-1283-1/hsa-mir-520a/hsa-mir-526b/hsa-mir-519b/hsa-mir-525/hsa-mir-523/hsa-mir-518f/hsa-mir-520b/hsa-mir-518b/hsa-mir-526a-1/hsa-mir-520c/hsa-mir-518c/hsa-mir-524/hsa-mir-517a/hsa-mir-519d/hsa-mir-521-2/hsa-mir-520d/hsa-mir-517b/…	4	rs773942654	53758248	A > G	8e-06	4	UCUACAAAGGAAAGCGCUUUCU	UCUGCAAAGGAAAGCGCUUUCU	hsa-miR-1283,UCU[A/G]CAAAGGAAAGCGCUUUCU	1090	1038	234	21.9991
1456	hsa-miR-1283	chr19	+	hsa-mir-1283-2	Yes (53666691-53762418:46:HHC:hsa-mir-512-1/hsa-mir-512-2/hsa-mir-1323/hsa-mir-498/hsa-mir-520e/hsa-mir-515-1/hsa-mir-519e/hsa-mir-520f/hsa-mir-515-2/hsa-mir-519c/hsa-mir-1283-1/hsa-mir-520a/hsa-mir-526b/hsa-mir-519b/hsa-mir-525/hsa-mir-523/hsa-mir-518f/hsa-mir-520b/hsa-mir-518b/hsa-mir-526a-1/hsa-mir-520c/hsa-mir-518c/hsa-mir-524/hsa-mir-517a/hsa-mir-519d/hsa-mir-521-2/hsa-mir-520d/hsa-mir-517b/…	4	rs761267993	53758249	C > G	8e-06	5	UCUACAAAGGAAAGCGCUUUCU	UCUAGAAAGGAAAGCGCUUUCU	hsa-miR-1283,UCUA[C/G]AAAGGAAAGCGCUUUCU	1090	1069	244	22.6041
1456	hsa-miR-1283	chr19	+	hsa-mir-1283-2	Yes (53666691-53762418:46:HHC:hsa-mir-512-1/hsa-mir-512-2/hsa-mir-1323/hsa-mir-498/hsa-mir-520e/hsa-mir-515-1/hsa-mir-519e/hsa-mir-520f/hsa-mir-515-2/hsa-mir-519c/hsa-mir-1283-1/hsa-mir-520a/hsa-mir-526b/hsa-mir-519b/hsa-mir-525/hsa-mir-523/hsa-mir-518f/hsa-mir-520b/hsa-mir-518b/hsa-mir-526a-1/hsa-mir-520c/hsa-mir-518c/hsa-mir-524/hsa-mir-517a/hsa-mir-519d/hsa-mir-521-2/hsa-mir-520d/hsa-mir-517b/…	4	rs372935961	53758251	A > G	8e-06	7	UCUACAAAGGAAAGCGCUUUCU	UCUACAGAGGAAAGCGCUUUCU	hsa-miR-1283,UCUACA[A/G]AGGAAAGCGCUUUCU	1090	679	161	18.7145
1457	hsa-miR-516a-5p	chr19	+	hsa-mir-516a-2	Yes (53666691-53762418:46:HHC:hsa-mir-512-1/hsa-mir-512-2/hsa-mir-1323/hsa-mir-498/hsa-mir-520e/hsa-mir-515-1/hsa-mir-519e/hsa-mir-520f/hsa-mir-515-2/hsa-mir-519c/hsa-mir-1283-1/hsa-mir-520a/hsa-mir-526b/hsa-mir-519b/hsa-mir-525/hsa-mir-523/hsa-mir-518f/hsa-mir-520b/hsa-mir-518b/hsa-mir-526a-1/hsa-mir-520c/hsa-mir-518c/hsa-mir-524/hsa-mir-517a/hsa-mir-519d/hsa-mir-521-2/hsa-mir-520d/hsa-mir-517b/…	2	rs766662891	53761152	C > T	3.3e-05	5	UUCUCGAGGAAAGAAGCACUUUC	UUCUUGAGGAAAGAAGCACUUUC	hsa-miR-516a-5p,UUCU[C/U]GAGGAAAGAAGCACUUUC	33	629	3	2.08228
1457	hsa-miR-516a-5p	chr19	+	hsa-mir-516a-2	Yes (53666691-53762418:46:HHC:hsa-mir-512-1/hsa-mir-512-2/hsa-mir-1323/hsa-mir-498/hsa-mir-520e/hsa-mir-515-1/hsa-mir-519e/hsa-mir-520f/hsa-mir-515-2/hsa-mir-519c/hsa-mir-1283-1/hsa-mir-520a/hsa-mir-526b/hsa-mir-519b/hsa-mir-525/hsa-mir-523/hsa-mir-518f/hsa-mir-520b/hsa-mir-518b/hsa-mir-526a-1/hsa-mir-520c/hsa-mir-518c/hsa-mir-524/hsa-mir-517a/hsa-mir-519d/hsa-mir-521-2/hsa-mir-520d/hsa-mir-517b/…	2	rs754319127	53761153	G > A	3.3e-05	6	UUCUCGAGGAAAGAAGCACUUUC	UUCUCAAGGAAAGAAGCACUUUC	hsa-miR-516a-5p,UUCUC[G/A]AGGAAAGAAGCACUUUC	33	955	5	2.81651
1458	hsa-miR-516a-3p	chr19	+	hsa-mir-516a-2	Yes (53666691-53762418:46:HHC:hsa-mir-512-1/hsa-mir-512-2/hsa-mir-1323/hsa-mir-498/hsa-mir-520e/hsa-mir-515-1/hsa-mir-519e/hsa-mir-520f/hsa-mir-515-2/hsa-mir-519c/hsa-mir-1283-1/hsa-mir-520a/hsa-mir-526b/hsa-mir-519b/hsa-mir-525/hsa-mir-523/hsa-mir-518f/hsa-mir-520b/hsa-mir-518b/hsa-mir-526a-1/hsa-mir-520c/hsa-mir-518c/hsa-mir-524/hsa-mir-517a/hsa-mir-519d/hsa-mir-521-2/hsa-mir-520d/hsa-mir-517b/…	0
1459	hsa-miR-519a-3p	chr19	+	hsa-mir-519a-2	Yes (53666691-53762418:46:HHC:hsa-mir-512-1/hsa-mir-512-2/hsa-mir-1323/hsa-mir-498/hsa-mir-520e/hsa-mir-515-1/hsa-mir-519e/hsa-mir-520f/hsa-mir-515-2/hsa-mir-519c/hsa-mir-1283-1/hsa-mir-520a/hsa-mir-526b/hsa-mir-519b/hsa-mir-525/hsa-mir-523/hsa-mir-518f/hsa-mir-520b/hsa-mir-518b/hsa-mir-526a-1/hsa-mir-520c/hsa-mir-518c/hsa-mir-524/hsa-mir-517a/hsa-mir-519d/hsa-mir-521-2/hsa-mir-520d/hsa-mir-517b/…	2	rs571969785	53762404	A > T	1.6e-05	8	AAAGUGCAUCCUUUUAGAGUGU	AAAGUGCUUCCUUUUAGAGUGU	hsa-miR-519a-3p,AAAGUGC[A/U]UCCUUUUAGAGUGU	756	690	266	36.8295
1459	hsa-miR-519a-3p	chr19	+	hsa-mir-519a-2	Yes (53666691-53762418:46:HHC:hsa-mir-512-1/hsa-mir-512-2/hsa-mir-1323/hsa-mir-498/hsa-mir-520e/hsa-mir-515-1/hsa-mir-519e/hsa-mir-520f/hsa-mir-515-2/hsa-mir-519c/hsa-mir-1283-1/hsa-mir-520a/hsa-mir-526b/hsa-mir-519b/hsa-mir-525/hsa-mir-523/hsa-mir-518f/hsa-mir-520b/hsa-mir-518b/hsa-mir-526a-1/hsa-mir-520c/hsa-mir-518c/hsa-mir-524/hsa-mir-517a/hsa-mir-519d/hsa-mir-521-2/hsa-mir-520d/hsa-mir-517b/…	2	rs764494592	53762402	G > A	8e-06	6	AAAGUGCAUCCUUUUAGAGUGU	AAAGUACAUCCUUUUAGAGUGU	hsa-miR-519a-3p,AAAGU[G/A]CAUCCUUUUAGAGUGU	756	863	155	19.1896
1460	hsa-miR-371a-5p	chr19	+	hsa-mir-371a	Yes (53787677-53788770:3:HHC:hsa-mir-371a/hsa-mir-372/hsa-mir-373)	0
1461	hsa-miR-371a-3p	chr19	+	hsa-mir-371a	Yes (53787677-53788770:3:HHC:hsa-mir-371a/hsa-mir-372/hsa-mir-373)	2	rs751339395	53787723	G > T	5.8e-05	8	AAGUGCCGCCAUCUUUUGAGUGU	AAGUGCCUCCAUCUUUUGAGUGU	hsa-miR-371a-3p,AAGUGCC[G/U]CCAUCUUUUGAGUGU	79	280	54	36.3079
1461	hsa-miR-371a-3p	chr19	+	hsa-mir-371a	Yes (53787677-53788770:3:HHC:hsa-mir-371a/hsa-mir-372/hsa-mir-373)	2	rs763757401	53787719	T > A	8e-06	4	AAGUGCCGCCAUCUUUUGAGUGU	AAGAGCCGCCAUCUUUUGAGUGU	hsa-miR-371a-3p,AAG[U/A]GCCGCCAUCUUUUGAGUGU	79	121	1	1.02281
1462	hsa-miR-371b-5p	chr19	-	hsa-mir-371b	Yes (53787677-53788770:3:HHC:hsa-mir-371a/hsa-mir-372/hsa-mir-373)	1	rs767556394	53787734	A > T	5e-05	3	ACUCAAAAGAUGGCGGCACUUU	ACACAAAAGAUGGCGGCACUUU	hsa-miR-371b-5p,AC[U/A]CAAAAGAUGGCGGCACUUU	1778	2143	690	35.3486
1463	hsa-miR-371b-3p	chr19	-	hsa-mir-371b	Yes (53787677-53788770:3:HHC:hsa-mir-371a/hsa-mir-372/hsa-mir-373)	1	rs773769548	53787695	G > T	0.0001	6	AAGUGCCCCCACAGUUUGAGUGC	AAGUGACCCCACAGUUUGAGUGC	hsa-miR-371b-3p,AAGUG[C/A]CCCCACAGUUUGAGUGC	250	320	17	6.01041
1464	hsa-miR-372-3p	chr19	+	hsa-mir-372	Yes (53787677-53788770:3:HHC:hsa-mir-371a/hsa-mir-372/hsa-mir-373)	0
1465	hsa-miR-372-5p	chr19	+	hsa-mir-372	Yes (53787677-53788770:3:HHC:hsa-mir-371a/hsa-mir-372/hsa-mir-373)	3	rs370207124	53787900	A > C	9.7e-05	6	CCUCAAAUGUGGAGCACUAUUCU	CCUCACAUGUGGAGCACUAUUCU	hsa-miR-372-5p,CCUCA[A/C]AUGUGGAGCACUAUUCU	1276	697	173	18.3444
1465	hsa-miR-372-5p	chr19	+	hsa-mir-372	Yes (53787677-53788770:3:HHC:hsa-mir-371a/hsa-mir-372/hsa-mir-373)	3	rs759597789	53787901	A > G	1.7e-05	7	CCUCAAAUGUGGAGCACUAUUCU	CCUCAAGUGUGGAGCACUAUUCU	hsa-miR-372-5p,CCUCAA[A/G]UGUGGAGCACUAUUCU	1276	637	172	19.078
1465	hsa-miR-372-5p	chr19	+	hsa-mir-372	Yes (53787677-53788770:3:HHC:hsa-mir-371a/hsa-mir-372/hsa-mir-373)	3	rs765248574	53787902	T > C	3.3e-05	8	CCUCAAAUGUGGAGCACUAUUCU	CCUCAAACGUGGAGCACUAUUCU	hsa-miR-372-5p,CCUCAAA[U/C]GUGGAGCACUAUUCU	1276	1265	730	57.4582
1466	hsa-miR-373-5p	chr19	+	hsa-mir-373	Yes (53787677-53788770:3:HHC:hsa-mir-371a/hsa-mir-372/hsa-mir-373)	1	rs539819650	53788711	C > T	0.0002	2	ACUCAAAAUGGGGGCGCUUUCC	AUUCAAAAUGGGGGCGCUUUCC	hsa-miR-373-5p,A[C/U]UCAAAAUGGGGGCGCUUUCC	1778	3030	844	36.3626
1467	hsa-miR-373-3p	chr19	+	hsa-mir-373	Yes (53787677-53788770:3:HHC:hsa-mir-371a/hsa-mir-372/hsa-mir-373)	1	rs749244544	53788750	A > G	4.6e-05	3	GAAGUGCUUCGAUUUUGGGGUGU	GAGGUGCUUCGAUUUUGGGGUGU	hsa-miR-373-3p,GA[A/G]GUGCUUCGAUUUUGGGGUGU	690	281	43	9.76542
1468	hsa-miR-935	chr19	+	hsa-mir-935	No	0
1469	hsa-miR-4752	chr19	+	hsa-mir-4752	No	0
1470	hsa-miR-8061	chr19	+	hsa-mir-8061	No	1	rs555660466	54645323	G > T	0.002196	5	CUUAGAUUAGAGGAUAUUGUU	CUUAUAUUAGAGGAUAUUGUU	hsa-miR-8061,CUUA[G/U]AUUAGAGGAUAUUGUU	779	2041	336	26.647
1471	hsa-miR-7975	chr19	-	hsa-mir-7975	No	0
1472	hsa-miR-6804-5p	chr19	-	hsa-mir-6804	Yes (55230884-55245245:3:hetero:hsa-mir-6804/hsa-mir-6802/hsa-mir-6803)	2	rs747708633	55230944	C > T	0.000125	4	UGAGGGUGUCAGCAGGUGACG	UGAAGGUGUCAGCAGGUGACG	hsa-miR-6804-5p,UGA[G/A]GGUGUCAGCAGGUGACG	419	439	37	8.62705
1472	hsa-miR-6804-5p	chr19	-	hsa-mir-6804	Yes (55230884-55245245:3:hetero:hsa-mir-6804/hsa-mir-6802/hsa-mir-6803)	2	rs778661617	55230942	C > T	2.1e-05	6	UGAGGGUGUCAGCAGGUGACG	UGAGGAUGUCAGCAGGUGACG	hsa-miR-6804-5p,UGAGG[G/A]UGUCAGCAGGUGACG	419	409	36	8.69629
1473	hsa-miR-6804-3p	chr19	-	hsa-mir-6804	Yes (55230884-55245245:3:hetero:hsa-mir-6804/hsa-mir-6802/hsa-mir-6803)	2	rs773226883	55230903	T > G	5.7e-05	4	CGCACCUGCCUCUCACCCACAG	CGCCCCUGCCUCUCACCCACAG	hsa-miR-6804-3p,CGC[A/C]CCUGCCUCUCACCCACAG	375	450	37	9.00699
1473	hsa-miR-6804-3p	chr19	-	hsa-mir-6804	Yes (55230884-55245245:3:hetero:hsa-mir-6804/hsa-mir-6802/hsa-mir-6803)	2	rs771445589	55230899	C > T	1.1e-05	8	CGCACCUGCCUCUCACCCACAG	CGCACCUACCUCUCACCCACAG	hsa-miR-6804-3p,CGCACCU[G/A]CCUCUCACCCACAG	375	224	85	29.3278
1474	hsa-miR-6802-5p	chr19	-	hsa-mir-6802	Yes (55230884-55245245:3:hetero:hsa-mir-6804/hsa-mir-6802/hsa-mir-6803)	3	rs748290466	55239969	T > A	1.1e-05	3	CUAGGUGGGGGGCUUGAAGC	CUUGGUGGGGGGCUUGAAGC	hsa-miR-6802-5p,CU[A/U]GGUGGGGGGCUUGAAGC	233	498	29	8.51345
1474	hsa-miR-6802-5p	chr19	-	hsa-mir-6802	Yes (55230884-55245245:3:hetero:hsa-mir-6804/hsa-mir-6802/hsa-mir-6803)	3	rs369838840	55239965	C > T	1e-05	7	CUAGGUGGGGGGCUUGAAGC	CUAGGUAGGGGGCUUGAAGC	hsa-miR-6802-5p,CUAGGU[G/A]GGGGGCUUGAAGC	233	307	20	7.47796
1474	hsa-miR-6802-5p	chr19	-	hsa-mir-6802	Yes (55230884-55245245:3:hetero:hsa-mir-6804/hsa-mir-6802/hsa-mir-6803)	3	rs575428797	55239967	C > T	2e-05	5	CUAGGUGGGGGGCUUGAAGC	CUAGAUGGGGGGCUUGAAGC	hsa-miR-6802-5p,CUAG[G/A]UGGGGGGCUUGAAGC	233	333	17	6.10308
1475	hsa-miR-6802-3p	chr19	-	hsa-mir-6802	Yes (55230884-55245245:3:hetero:hsa-mir-6804/hsa-mir-6802/hsa-mir-6803)	3	rs761048265	55239926	G > A	1.7e-05	8	UUCACCCCUCUCACCUAAGCAG	UUCACCCUUCUCACCUAAGCAG	hsa-miR-6802-3p,UUCACCC[C/U]UCUCACCUAAGCAG	346	349	110	31.655
1475	hsa-miR-6802-3p	chr19	-	hsa-mir-6802	Yes (55230884-55245245:3:hetero:hsa-mir-6804/hsa-mir-6802/hsa-mir-6803)	3	rs374824483	55239927	G > A	2.6e-05	7	UUCACCCCUCUCACCUAAGCAG	UUCACCUCUCUCACCUAAGCAG	hsa-miR-6802-3p,UUCACC[C/U]CUCUCACCUAAGCAG	346	473	29	7.16852
1475	hsa-miR-6802-3p	chr19	-	hsa-mir-6802	Yes (55230884-55245245:3:hetero:hsa-mir-6804/hsa-mir-6802/hsa-mir-6803)	3	rs766240859	55239929	G > A	9e-06	5	UUCACCCCUCUCACCUAAGCAG	UUCAUCCCUCUCACCUAAGCAG	hsa-miR-6802-3p,UUCA[C/U]CCCUCUCACCUAAGCAG	346	423	36	9.4101
1476	hsa-miR-6803-5p	chr19	-	hsa-mir-6803	Yes (55230884-55245245:3:hetero:hsa-mir-6804/hsa-mir-6802/hsa-mir-6803)	1	rs766577968	55245243	C > A	1.3e-05	3	CUGGGGGUGGGGGGCUGGGCGU	CUUGGGGUGGGGGGCUGGGCGU	hsa-miR-6803-5p,CU[G/U]GGGGUGGGGGGCUGGGCGU	721	580	131	20.2577
1477	hsa-miR-6803-3p	chr19	-	hsa-mir-6803	Yes (55230884-55245245:3:hetero:hsa-mir-6804/hsa-mir-6802/hsa-mir-6803)	2	rs200798929	55245202	G > A	2e-05	6	UCCCUCGCCUUCUCACCCUCAG	UCCCUUGCCUUCUCACCCUCAG	hsa-miR-6803-3p,UCCCU[C/U]GCCUUCUCACCCUCAG	63	368	4	2.62703
1477	hsa-miR-6803-3p	chr19	-	hsa-mir-6803	Yes (55230884-55245245:3:hetero:hsa-mir-6804/hsa-mir-6802/hsa-mir-6803)	2	rs772366826	55245201	C > T	2.1e-05	7	UCCCUCGCCUUCUCACCCUCAG	UCCCUCACCUUCUCACCCUCAG	hsa-miR-6803-3p,UCCCUC[G/A]CCUUCUCACCCUCAG	63	522	5	2.75718
1478	hsa-miR-6805-5p	chr19	+	hsa-mir-6805	No	2	rs201627498	55388193	C > T	0.000238	8	UAGGGGGCGGCUUGUGGAGUGU	UAGGGGGUGGCUUGUGGAGUGU	hsa-miR-6805-5p,UAGGGGG[C/U]GGCUUGUGGAGUGU	448	341	171	43.7502
1478	hsa-miR-6805-5p	chr19	+	hsa-mir-6805	No	2	rs777273918	55388188	G > A	8e-06	3	UAGGGGGCGGCUUGUGGAGUGU	UAAGGGGCGGCUUGUGGAGUGU	hsa-miR-6805-5p,UA[G/A]GGGGCGGCUUGUGGAGUGU	448	459	81	17.8624
1479	hsa-miR-6805-3p	chr19	+	hsa-mir-6805	No	3	rs368617558	55388224	T > C	0.000676	5	UUGCUCUGCUCCCCCGCCCCCAG	UUGCCCUGCUCCCCCGCCCCCAG	hsa-miR-6805-3p,UUGC[U/C]CUGCUCCCCCGCCCCCAG	826	433	61	10.1999
1479	hsa-miR-6805-3p	chr19	+	hsa-mir-6805	No	3	rs376029266	55388223	C > T	3.3e-05	4	UUGCUCUGCUCCCCCGCCCCCAG	UUGUUCUGCUCCCCCGCCCCCAG	hsa-miR-6805-3p,UUG[C/U]UCUGCUCCCCCGCCCCCAG	826	832	120	14.4754
1479	hsa-miR-6805-3p	chr19	+	hsa-mir-6805	No	3	rs768027499	55388227	G > A	8e-06	8	UUGCUCUGCUCCCCCGCCCCCAG	UUGCUCUACUCCCCCGCCCCCAG	hsa-miR-6805-3p,UUGCUCU[G/A]CUCCCCCGCCCCCAG	826	572	282	41.0262
1480	hsa-miR-6806-5p	chr19	+	hsa-mir-6806	No	1	rs758969264	58334700	A > T	1e-05	8	UGUAGGCAUGAGGCAGGGCCCAGG	UGUAGGCUUGAGGCAGGGCCCAGG	hsa-miR-6806-5p,UGUAGGC[A/U]UGAGGCAGGGCCCAGG	225	169	34	17.4359
1481	hsa-miR-6806-3p	chr19	+	hsa-mir-6806	No	2	rs778043693	58334735	C > G	0.000112	6	UGAAGCUCUGACAUUCCUGCAG	UGAAGGUCUGACAUUCCUGCAG	hsa-miR-6806-3p,UGAAG[C/G]UCUGACAUUCCUGCAG	459	410	41	9.45117
1481	hsa-miR-6806-3p	chr19	+	hsa-mir-6806	No	2	rs751931935	58334736	T > G	1.7e-05	7	UGAAGCUCUGACAUUCCUGCAG	UGAAGCGCUGACAUUCCUGCAG	hsa-miR-6806-3p,UGAAGC[U/G]CUGACAUUCCUGCAG	459	40	2	1.47602
1482	hsa-miR-4754	chr19	-	hsa-mir-4754	No	0
1483	hsa-miR-6807-5p	chr19	+	hsa-mir-6807	No	1	rs751886149	58550292	A > G	1.6e-05	8	GUGAGCCAGUGGAAUGGAGAGG	GUGAGCCGGUGGAAUGGAGAGG	hsa-miR-6807-5p,GUGAGCC[A/G]GUGGAAUGGAGAGG	345	142	88	39.7584
1484	hsa-miR-6807-3p	chr19	+	hsa-mir-6807	No	1	rs531103442	58550355	A > G	2.4e-05	2	CACUGCAUUCCUGCUUGGCCCAG	CGCUGCAUUCCUGCUUGGCCCAG	hsa-miR-6807-3p,C[A/G]CUGCAUUCCUGCUUGGCCCAG	833	489	102	15.9817
1485	hsa-miR-7158-5p	chr2	+	hsa-mir-7158	No	0
1486	hsa-miR-7158-3p	chr2	+	hsa-mir-7158	No	0
1487	hsa-miR-7515	chr2	+	hsa-mir-7515	No	1	rs576086800	6650420	A > G	0.0002	3	AGAAGGGAAGAUGGUGAC	AGGAGGGAAGAUGGUGAC	hsa-miR-7515,AG[A/G]AGGGAAGAUGGUGAC	810	1101	188	19.9077
1488	hsa-miR-4261	chr2	-	hsa-mir-4261	No	0
1489	hsa-miR-4429	chr2	-	hsa-mir-4429	No	0
1490	hsa-miR-548s	chr2	+	hsa-mir-548s	No	0
1491	hsa-miR-4262	chr2	-	hsa-mir-4262	No	0
1492	hsa-miR-3681-5p	chr2	+	hsa-mir-3681	No	1	rs773395905	12199142	G > A	0.00066	5	UAGUGGAUGAUGCACUCUGUGC	UAGUAGAUGAUGCACUCUGUGC	hsa-miR-3681-5p,UAGU[G/A]GAUGAUGCACUCUGUGC	267	389	30	9.30874
1493	hsa-miR-3681-3p	chr2	+	hsa-mir-3681	No	0
1494	hsa-miR-3125	chr2	+	hsa-mir-3125	No	0
1495	hsa-miR-4757-5p	chr2	+	hsa-mir-4757	No	0
1496	hsa-miR-4757-3p	chr2	+	hsa-mir-4757	No	0
1497	hsa-miR-1301-3p	chr2	-	hsa-mir-1301	No	1	rs775188648	25328669	C > G	1.7e-05	6	UUGCAGCUGCCUGGGAGUGACUUC	UUGCACCUGCCUGGGAGUGACUUC	hsa-miR-1301-3p,UUGCA[G/C]CUGCCUGGGAGUGACUUC	481	273	26	7.17496
1498	hsa-miR-1301-5p	chr2	-	hsa-mir-1301	No	1	rs774581822	25328703	G > T	2e-05	5	CGCUCUAGGCACCGCAGCA	CGCUAUAGGCACCGCAGCA	hsa-miR-1301-5p,CGCU[C/A]UAGGCACCGCAGCA	254	350	22	7.37856
1499	hsa-miR-4263	chr2	+	hsa-mir-4263	No	0
1500	hsa-miR-558	chr2	+	hsa-mir-558	No	1	rs745706952	32532218	T > G	9e-06	6	UGAGCUGCUGUACCAAAAU	UGAGCGGCUGUACCAAAAU	hsa-miR-558,UGAGC[U/G]GCUGUACCAAAAU	557	46	8	4.99785
1501	hsa-miR-4765	chr2	+	hsa-mir-4765	No	0
1502	hsa-miR-4430	chr2	+	hsa-mir-4430	No	0
1503	hsa-miR-548ad-3p	chr2	+	hsa-mir-548ad	No	0
1504	hsa-miR-548ad-5p	chr2	+	hsa-mir-548ad	No	0
1505	hsa-miR-559	chr2	+	hsa-mir-559	No	2	rs778454448	47377696	A > G	8.8e-05	7	UAAAGUAAAUAUGCACCAAAA	UAAAGUGAAUAUGCACCAAAA	hsa-miR-559,UAAAGU[A/G]AAUAUGCACCAAAA	1737	1302	430	28.5932
1505	hsa-miR-559	chr2	+	hsa-mir-559	No	2	rs755115673	47377691	A > G	9.3e-05	2	UAAAGUAAAUAUGCACCAAAA	UGAAGUAAAUAUGCACCAAAA	hsa-miR-559,U[A/G]AAGUAAAUAUGCACCAAAA	1737	679	236	21.7309
1506	hsa-miR-548ba	chr2	+	hsa-mir-548ba	No	0
1507	hsa-miR-8485	chr2	-	hsa-mir-8485	No	0
1508	hsa-miR-4431	chr2	-	hsa-mir-4431	No	2	rs527283056	52702603	G > A	0.0002	7	GCGACUCUGAAAACUAGAAGGU	GCGACUUUGAAAACUAGAAGGU	hsa-miR-4431,GCGACU[C/U]UGAAAACUAGAAGGU	23	43	0	0
1508	hsa-miR-4431	chr2	-	hsa-mir-4431	No	2	rs540996200	52702605	G > C	0.0002	5	GCGACUCUGAAAACUAGAAGGU	GCGAGUCUGAAAACUAGAAGGU	hsa-miR-4431,GCGA[C/G]UCUGAAAACUAGAAGGU	23	54	0	0
1509	hsa-miR-3682-3p	chr2	-	hsa-mir-3682	No	0
1510	hsa-miR-3682-5p	chr2	-	hsa-mir-3682	No	1	rs116380885	53849189	T > C	0.006701	3	CUACUUCUACCUGUGUUAUCAU	CUGCUUCUACCUGUGUUAUCAU	hsa-miR-3682-5p,CU[A/G]CUUCUACCUGUGUUAUCAU	660	767	97	13.6333
1511	hsa-miR-217	chr2	-	hsa-mir-217	Yes (55983019-55989041:2:hetero:hsa-mir-217/hsa-mir-216a)	0
1512	hsa-miR-216a-5p	chr2	-	hsa-mir-216a	Yes (55983019-55989041:2:hetero:hsa-mir-217/hsa-mir-216a)	2	rs746980700	55989034	T > G	4.1e-05	8	UAAUCUCAGCUGGCAACUGUGA	UAAUCUCCGCUGGCAACUGUGA	hsa-miR-216a-5p,UAAUCUC[A/C]GCUGGCAACUGUGA	688	458	212	37.7667
1512	hsa-miR-216a-5p	chr2	-	hsa-mir-216a	Yes (55983019-55989041:2:hetero:hsa-mir-217/hsa-mir-216a)	2	rs757094946	55989040	T > G	8e-06	2	UAAUCUCAGCUGGCAACUGUGA	UCAUCUCAGCUGGCAACUGUGA	hsa-miR-216a-5p,U[A/C]AUCUCAGCUGGCAACUGUGA	688	704	87	12.5008
1513	hsa-miR-216a-3p	chr2	-	hsa-mir-216a	Yes (55983019-55989041:2:hetero:hsa-mir-217/hsa-mir-216a)	1	rs762165228	55988995	C > A	1.7e-05	8	UCACAGUGGUCUCUGGGAUUAU	UCACAGUUGUCUCUGGGAUUAU	hsa-miR-216a-3p,UCACAGU[G/U]GUCUCUGGGAUUAU	994	1000	480	48.1447
1514	hsa-miR-216b-5p	chr2	-	hsa-mir-216b	No	0
1515	hsa-miR-216b-3p	chr2	-	hsa-mir-216b	No	0
1516	hsa-miR-4432	chr2	-	hsa-mir-4432	No	0
1517	hsa-miR-5192	chr2	+	hsa-mir-5192	No	0
1518	hsa-miR-4433b-5p	chr2	-	hsa-mir-4433b	No	1	rs557760377	64340823	G > A	0.0002	7	AUGUCCCACCCCCACUCCUGU	AUGUCCUACCCCCACUCCUGU	hsa-miR-4433b-5p,AUGUCC[C/U]ACCCCCACUCCUGU	404	436	39	9.29246
1519	hsa-miR-4433b-3p	chr2	-	hsa-mir-4433b	No	0
1520	hsa-miR-4433a-3p	chr2	+	hsa-mir-4433a	No	0
1521	hsa-miR-4433a-5p	chr2	+	hsa-mir-4433a	No	0
1522	hsa-miR-4434	chr2	+	hsa-mir-4434	No	0
1523	hsa-miR-4778-5p	chr2	-	hsa-mir-4778	No	0
1524	hsa-miR-4778-3p	chr2	-	hsa-mir-4778	No	1	rs184768286	66358271	G > A	0.0002	8	UCUUCUUCCUUUGCAGAGUUGA	UCUUCUUUCUUUGCAGAGUUGA	hsa-miR-4778-3p,UCUUCUU[C/U]CUUUGCAGAGUUGA	1105	1464	693	54.4856
1525	hsa-miR-3126-5p	chr2	+	hsa-mir-3126	No	2	rs187256070	69103693	A > T	0.000799	3	UGAGGGACAGAUGCCAGAAGCA	UGUGGGACAGAUGCCAGAAGCA	hsa-miR-3126-5p,UG[A/U]GGGACAGAUGCCAGAAGCA	598	368	62	13.2165
1525	hsa-miR-3126-5p	chr2	+	hsa-mir-3126	No	2	rs182148652	69103692	G > A	0.000799	2	UGAGGGACAGAUGCCAGAAGCA	UAAGGGACAGAUGCCAGAAGCA	hsa-miR-3126-5p,U[G/A]AGGGACAGAUGCCAGAAGCA	598	587	82	13.8403
1526	hsa-miR-3126-3p	chr2	+	hsa-mir-3126	No	1	rs770252266	69103733	G > A	0.001287	7	CAUCUGGCAUCCGUCACACAGA	CAUCUGACAUCCGUCACACAGA	hsa-miR-3126-3p,CAUCUG[G/A]CAUCCGUCACACAGA	385	576	47	9.98059
1527	hsa-miR-1285-3p	chr2	-	hsa-mir-1285-2	No	0
1528	hsa-miR-5000-5p	chr2	+	hsa-mir-5000	No	0
1529	hsa-miR-5000-3p	chr2	+	hsa-mir-5000	No	0
1530	hsa-miR-4264	chr2	-	hsa-mir-4264	No	0
1531	hsa-miR-8080	chr2	-	hsa-mir-8080	No	0
1532	hsa-miR-6071	chr2	-	hsa-mir-6071	No	0
1533	hsa-miR-4779	chr2	-	hsa-mir-4779	No	0
1534	hsa-miR-4771	chr2	+	hsa-mir-4771-1	No	0
1535	hsa-miR-4435	chr2	+	hsa-mir-4435-1	No	0
1536	hsa-miR-4780	chr2	-	hsa-mir-4780	No	0
1537	hsa-miR-4436a	chr2	+	hsa-mir-4436a	No	0
1538	hsa-miR-3127-5p	chr2	+	hsa-mir-3127	No	0
1539	hsa-miR-3127-3p	chr2	+	hsa-mir-3127	No	0
1540	hsa-miR-5696	chr2	+	hsa-mir-5696	No	1	rs571745487	101309455	C > T	0.0002	3	CUCAUUUAAGUAGUCUGAUGCC	CUUAUUUAAGUAGUCUGAUGCC	hsa-miR-5696,CU[C/U]AUUUAAGUAGUCUGAUGCC	2290	4071	1282	41.9875
1541	hsa-miR-4772-5p	chr2	+	hsa-mir-4772	No	0
1542	hsa-miR-4772-3p	chr2	+	hsa-mir-4772	No	0
1543	hsa-miR-4265	chr2	-	hsa-mir-4265	No	1	rs547651740	109141513	C > G	0.000305	6	CUGUGGGCUCAGCUCUGGG	CUGUGCGCUCAGCUCUGGG	hsa-miR-4265,CUGUG[G/C]GCUCAGCUCUGGG	442	29	5	4.41631
1544	hsa-miR-4266	chr2	-	hsa-mir-4266	No	0
1545	hsa-miR-4267	chr2	-	hsa-mir-4267	No	0
1546	hsa-miR-4436b-5p	chr2	-	hsa-mir-4436b-1	No	0
1547	hsa-miR-4436b-3p	chr2	-	hsa-mir-4436b-1	No	0
1548	hsa-miR-4436b-5p	chr2	+	hsa-mir-4436b-2	No	0
1549	hsa-miR-4436b-3p	chr2	+	hsa-mir-4436b-2	No	0
1550	hsa-miR-4435	chr2	-	hsa-mir-4435-2	No	0
1551	hsa-miR-4771	chr2	-	hsa-mir-4771-2	No	0
1552	hsa-miR-1302	chr2	-	hsa-mir-1302-3	No	3	rs767181382	113583019	T > C	8e-06	6	UUGGGACAUACUUAUGCUAAA	UUGGGGCAUACUUAUGCUAAA	hsa-miR-1302,UUGGG[A/G]CAUACUUAUGCUAAA	360	545	46	10.385
1552	hsa-miR-1302	chr2	-	hsa-mir-1302-3	No	3	rs759420198	113583018	G > T	8e-06	7	UUGGGACAUACUUAUGCUAAA	UUGGGAAAUACUUAUGCUAAA	hsa-miR-1302,UUGGGA[C/A]AUACUUAUGCUAAA	360	440	31	7.78904
1552	hsa-miR-1302	chr2	-	hsa-mir-1302-3	No	3	rs764285103	113583022	C > T	8e-06	3	UUGGGACAUACUUAUGCUAAA	UUAGGACAUACUUAUGCUAAA	hsa-miR-1302,UU[G/A]GGACAUACUUAUGCUAAA	360	24	1	1.07583
1553	hsa-miR-4782-5p	chr2	-	hsa-mir-4782	No	0
1554	hsa-miR-4782-3p	chr2	-	hsa-mir-4782	No	1	rs556842072	113721314	C > T	0.001797	6	UGAUUGUCUUCAUAUCUAGAAC	UGAUUAUCUUCAUAUCUAGAAC	hsa-miR-4782-3p,UGAUU[G/A]UCUUCAUAUCUAGAAC	297	488	37	9.71882
1555	hsa-miR-4783-5p	chr2	-	hsa-mir-4783	No	0
1556	hsa-miR-4783-3p	chr2	-	hsa-mir-4783	No	0
1557	hsa-miR-4784	chr2	-	hsa-mir-4784	No	0
1558	hsa-miR-663b	chr2	-	hsa-mir-663b	No	2	rs753757490	132256989	A > G	9e-06	3	GGUGGCCCGGCCGUGCCUGAGG	GGCGGCCCGGCCGUGCCUGAGG	hsa-miR-663b,GG[U/C]GGCCCGGCCGUGCCUGAGG	444	71	8	4.50577
1558	hsa-miR-663b	chr2	-	hsa-mir-663b	No	2	rs577757339	132256985	G > A	1.7e-05	7	GGUGGCCCGGCCGUGCCUGAGG	GGUGGCUCGGCCGUGCCUGAGG	hsa-miR-663b,GGUGGC[C/U]CGGCCGUGCCUGAGG	444	649	65	12.1088
1559	hsa-miR-3679-5p	chr2	+	hsa-mir-3679	No	0
1560	hsa-miR-3679-3p	chr2	+	hsa-mir-3679	No	0
1561	hsa-miR-5590-5p	chr2	+	hsa-mir-5590	No	0
1562	hsa-miR-5590-3p	chr2	+	hsa-mir-5590	No	0
1563	hsa-miR-128-3p	chr2	+	hsa-mir-128-1	No	1	rs752296690	135665450	A > G	8e-06	5	UCACAGUGAACCGGUCUCUUU	UCACGGUGAACCGGUCUCUUU	hsa-miR-128-3p,UCAC[A/G]GUGAACCGGUCUCUUU	994	69	8	3.05473
1564	hsa-miR-128-1-5p	chr2	+	hsa-mir-128-1	No	2	rs117812383	135665418	G > A	1.6e-05	8	CGGGGCCGUAGCACUGUCUGAGA	CGGGGCCAUAGCACUGUCUGAGA	hsa-miR-128-1-5p,CGGGGCC[G/A]UAGCACUGUCUGAGA	337	558	230	53.0391
1564	hsa-miR-128-1-5p	chr2	+	hsa-mir-128-1	No	2	rs368374639	135665414	G > A	8e-06	4	CGGGGCCGUAGCACUGUCUGAGA	CGGAGCCGUAGCACUGUCUGAGA	hsa-miR-128-1-5p,CGG[G/A]GCCGUAGCACUGUCUGAGA	337	179	29	11.8075
1565	hsa-miR-7157-5p	chr2	-	hsa-mir-7157	No	0
1566	hsa-miR-7157-3p	chr2	-	hsa-mir-7157	No	0
1567	hsa-miR-4773	chr2	-	hsa-mir-4773-2	No	0
1568	hsa-miR-4773	chr2	+	hsa-mir-4773-1	No	0
1569	hsa-miR-6888-5p	chr2	+	hsa-mir-6888	No	1	rs766276740	159186843	G > C	0.000179	4	AAGGAGAUGCUCAGGCAGAU	AAGCAGAUGCUCAGGCAGAU	hsa-miR-6888-5p,AAG[G/C]AGAUGCUCAGGCAGAU	631	623	111	17.7037
1570	hsa-miR-6888-3p	chr2	+	hsa-mir-6888	No	2	rs766978841	159186883	C > A	8e-06	3	AUCUGUCUCGAUUGUUUCCAG	AUAUGUCUCGAUUGUUUCCAG	hsa-miR-6888-3p,AU[C/A]UGUCUCGAUUGUUUCCAG	698	455	52	9.2272
1570	hsa-miR-6888-3p	chr2	+	hsa-mir-6888	No	2	rs372198237	159186888	T > G	8e-06	8	AUCUGUCUCGAUUGUUUCCAG	AUCUGUCGCGAUUGUUUCCAG	hsa-miR-6888-3p,AUCUGUC[U/G]CGAUUGUUUCCAG	698	281	230	51.9334
1571	hsa-miR-4785	chr2	-	hsa-mir-4785	No	0
1572	hsa-miR-4774-5p	chr2	+	hsa-mir-4774	No	0
1573	hsa-miR-4774-3p	chr2	+	hsa-mir-4774	No	0
1574	hsa-miR-933	chr2	-	hsa-mir-933	No	2	rs377081458	175167660	C > A	0.000267	4	UGUGCGCAGGGAGACCUCUCCC	UGUUCGCAGGGAGACCUCUCCC	hsa-miR-933,UGU[G/U]CGCAGGGAGACCUCUCCC	33	30	0	0
1574	hsa-miR-933	chr2	-	hsa-mir-933	No	2	rs139770589	175167656	T > C	0.004111	8	UGUGCGCAGGGAGACCUCUCCC	UGUGCGCGGGGAGACCUCUCCC	hsa-miR-933,UGUGCGC[A/G]GGGAGACCUCUCCC	33	20	2	7.78499
1575	hsa-miR-10b-5p	chr2	+	hsa-mir-10b	No	1	rs747667744	176150332	C > T	9e-06	4	UACCCUGUAGAACCGAAUUUGUG	UACUCUGUAGAACCGAAUUUGUG	hsa-miR-10b-5p,UAC[C/U]CUGUAGAACCGAAUUUGUG	334	522	24	5.74781
1576	hsa-miR-10b-3p	chr2	+	hsa-mir-10b	No	1	rs770679233	176150369	C > T	1.7e-05	2	ACAGAUUCGAUUCUAGGGGAAU	AUAGAUUCGAUUCUAGGGGAAU	hsa-miR-10b-3p,A[C/U]AGAUUCGAUUCUAGGGGAAU	713	594	94	14.4441
1577	hsa-miR-7704	chr2	+	hsa-mir-7704	No	1	rs746543378	176188848	T > G	0.000368	6	CGGGGUCGGCGGCGACGUG	CGGGGGCGGCGGCGACGUG	hsa-miR-7704,CGGGG[U/G]CGGCGGCGACGUG	110	383	20	9.74393
1578	hsa-miR-1246	chr2	-	hsa-mir-1246	No	1	rs757265617	176601037	T > C	2.5e-05	6	AAUGGAUUUUUGGAGCAGG	AAUGGGUUUUUGGAGCAGG	hsa-miR-1246,AAUGG[A/G]UUUUUGGAGCAGG	540	323	38	9.09883
1579	hsa-miR-4444	chr2	+	hsa-mir-4444-1	No	3	rs746587138	177212770	C > A	7.8e-05	3	CUCGAGUUGGAAGAGGCG	CUAGAGUUGGAAGAGGCG	hsa-miR-4444,CU[C/A]GAGUUGGAAGAGGCG	62	465	3	1.76685
1579	hsa-miR-4444	chr2	+	hsa-mir-4444-1	No	3	rs768306188	177212771	G > C	9e-06	4	CUCGAGUUGGAAGAGGCG	CUCCAGUUGGAAGAGGCG	hsa-miR-4444,CUC[G/C]AGUUGGAAGAGGCG	62	854	5	2.17293
1579	hsa-miR-4444	chr2	+	hsa-mir-4444-1	No	3	rs780893829	177212775	T > G	5.4e-05	8	CUCGAGUUGGAAGAGGCG	CUCGAGUGGGAAGAGGCG	hsa-miR-4444,CUCGAGU[U/G]GGAAGAGGCG	62	51	3	5.33507
1580	hsa-miR-3128	chr2	-	hsa-mir-3128	No	0
1581	hsa-miR-6512-5p	chr2	-	hsa-mir-6512	No	0
1582	hsa-miR-6512-3p	chr2	-	hsa-mir-6512	No	0
1583	hsa-miR-1258	chr2	-	hsa-mir-1258	No	0
1584	hsa-miR-4437	chr2	-	hsa-mir-4437	No	1	rs574201149	181305612	C > T	0.0002	2	UGGGCUCAGGGUACAAAGGUU	UAGGCUCAGGGUACAAAGGUU	hsa-miR-4437,U[G/A]GGCUCAGGGUACAAAGGUU	443	320	33	8.7647
1585	hsa-miR-548ae-3p	chr2	+	hsa-mir-548ae-1	No	0
1586	hsa-miR-561-3p	chr2	+	hsa-mir-561	No	0
1587	hsa-miR-561-5p	chr2	+	hsa-mir-561	No	1	rs770120005	188297521	A > G	7.5e-05	5	AUCAAGGAUCUUAAACUUUGCC	AUCAGGGAUCUUAAACUUUGCC	hsa-miR-561-5p,AUCA[A/G]GGAUCUUAAACUUUGCC	670	653	76	11.49
1588	hsa-miR-1245a	chr2	+	hsa-mir-1245a	No	1	rs780486044	188978141	A > G	9e-05	6	AAGUGAUCUAAAGGCCUACAU	AAGUGGUCUAAAGGCCUACAU	hsa-miR-1245a,AAGUG[A/G]UCUAAAGGCCUACAU	365	280	31	9.69697
1589	hsa-miR-1245b-5p	chr2	-	hsa-mir-1245b	No	0
1590	hsa-miR-1245b-3p	chr2	-	hsa-mir-1245b	No	1	rs748755619	188978117	C > T	7.3e-05	4	UCAGAUGAUCUAAAGGCCUAUA	UCAAAUGAUCUAAAGGCCUAUA	hsa-miR-1245b-3p,UCA[G/A]AUGAUCUAAAGGCCUAUA	719	1436	196	19.2892
1591	hsa-miR-3606-5p	chr2	+	hsa-mir-3606	No	0
1592	hsa-miR-3606-3p	chr2	+	hsa-mir-3606	No	1	rs768697971	188995675	T > C	5.9e-05	5	AAAAUUUCUUUCACUACUUAG	AAAACUUCUUUCACUACUUAG	hsa-miR-3606-3p,AAAA[U/C]UUCUUUCACUACUUAG	2546	1361	677	36.3689
1593	hsa-miR-3129-5p	chr2	-	hsa-mir-3129	No	0
1594	hsa-miR-3129-3p	chr2	-	hsa-mir-3129	No	0
1595	hsa-miR-3130-5p	chr2	-	hsa-mir-3130-1	No	0
1596	hsa-miR-3130-3p	chr2	-	hsa-mir-3130-1	No	1	rs754690230	206783258	G > A	0.000247	8	GCUGCACCGGAGACUGGGUAA	GCUGCACUGGAGACUGGGUAA	hsa-miR-3130-3p,GCUGCAC[C/U]GGAGACUGGGUAA	438	431	158	36.3648
1597	hsa-miR-3130-5p	chr2	+	hsa-mir-3130-2	No	1	rs780109357	206783247	A > T	0.000428	2	UACCCAGUCUCCGGUGCAGCC	UUCCCAGUCUCCGGUGCAGCC	hsa-miR-3130-5p,U[A/U]CCCAGUCUCCGGUGCAGCC	453	887	78	12.3051
1598	hsa-miR-3130-3p	chr2	+	hsa-mir-3130-2	No	0
1599	hsa-miR-2355-5p	chr2	-	hsa-mir-2355	No	0
1600	hsa-miR-2355-3p	chr2	-	hsa-mir-2355	No	2	rs528811975	207110017	C > A	0.0002	4	AUUGUCCUUGCUGUUUGGAGAU	AUUUUCCUUGCUGUUUGGAGAU	hsa-miR-2355-3p,AUU[G/U]UCCUUGCUGUUUGGAGAU	529	2347	221	19.8339
1600	hsa-miR-2355-3p	chr2	-	hsa-mir-2355	No	2	rs565921099	207110014	G > T	0.0002	7	AUUGUCCUUGCUGUUUGGAGAU	AUUGUCAUUGCUGUUUGGAGAU	hsa-miR-2355-3p,AUUGUC[C/A]UUGCUGUUUGGAGAU	529	771	75	11.7437
1601	hsa-miR-7845-5p	chr2	+	hsa-mir-7845	No	0
1602	hsa-miR-1302	chr2	-	hsa-mir-1302-4	No	2	rs373943952	207269341	T > C	8e-06	8	UUGGGACAUACUUAUGCUAAA	UUGGGACGUACUUAUGCUAAA	hsa-miR-1302,UUGGGAC[A/G]UACUUAUGCUAAA	360	109	65	32.8132
[truncated: 1,468 more rows]
